# Supplementary material for: Changes of Milk Metabolomic Profiles Resulting from a Mycotoxins-Contaminated Corn Silage Intake by Dairy Cows
Source: MDPI journal article supplement (doi:10.3390/metabo11080475), 2021-07-23

**Supplementary Figure S1.** Metabolomic view map according to metabolites identified in milk from dairy cows fed with mycotoxins-contaminated corn silages. The x-axis represents the pathway impact, and y-axis represents the pathway enrichment. Larger sizes and darker colors represent higher pathway enrichment and higher pathway impact values, respectively.

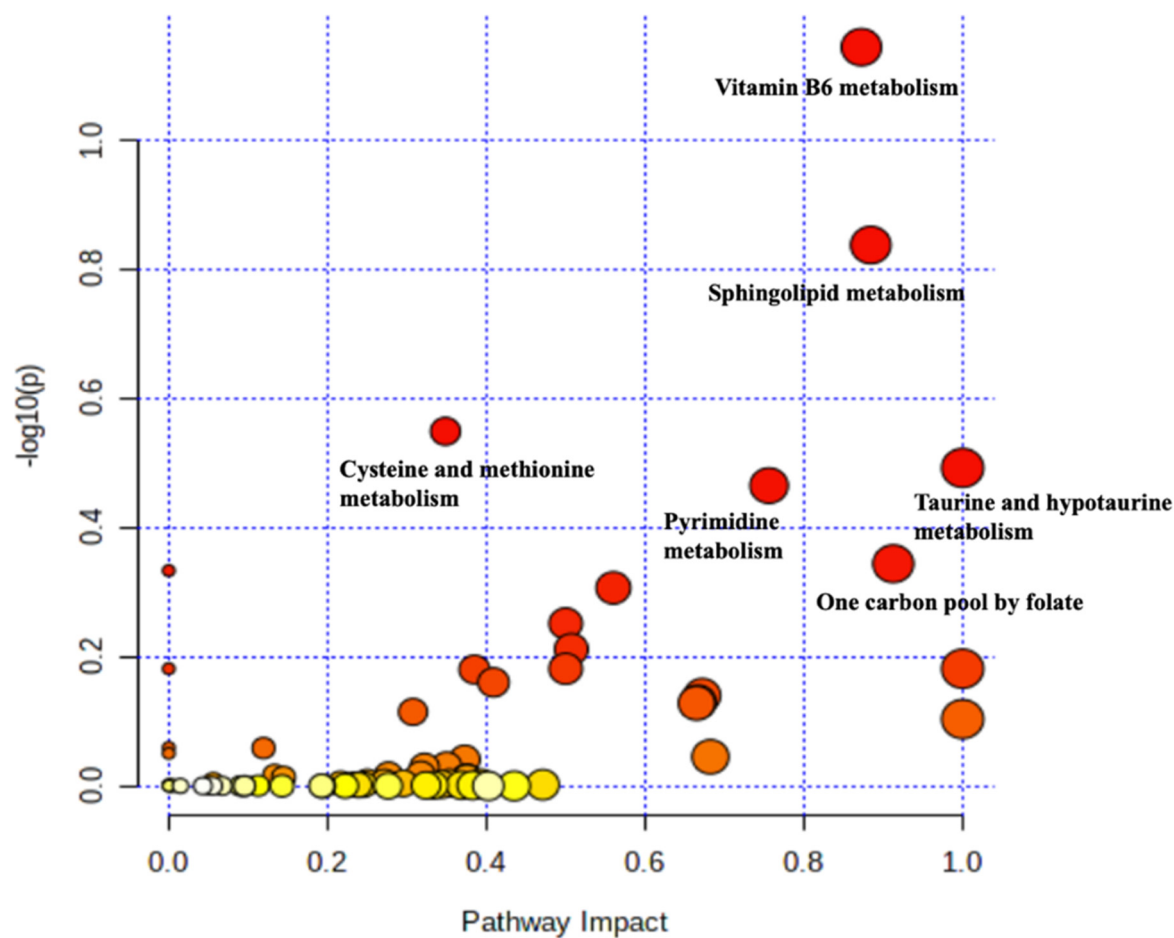

Supplement: s1 [file s1]
