# Supplementary material for: Changes of Milk Metabolomic Profiles Resulting from a Mycotoxins-Contaminated Corn Silage Intake by Dairy Cows
Source: Metabolites. 2021 Jul 23;11(8):475. doi: 10.3390/metabo11080475 (PMC8400352; doi:10.3390/metabo11080475)
Supplement: Supplementary file 1 [file metabolites-11-00475-s001.zip › Table S1.xlsx]

## Sheet: sample legend
Sample	Cluster corn silage
2	cluster 1
6	cluster 1
11	cluster 1
14	cluster 1
16	cluster 1			Cluster 1 = 18
19	cluster 1
20	cluster 1			Cluster 2 = 17
22	cluster 1
25	cluster 1			Cluster 3 = 2
29	cluster 1
33	cluster 1			Cluster 4 = 5
36	cluster 1
37	cluster 1			Cluster 5 = 3
38	cluster 1
39	cluster 1
40	cluster 1
43	cluster 1
45	cluster 1
1	cluster 2
3	cluster 2
7	cluster 2
10	cluster 2
13	cluster 2
15	cluster 2
17	cluster 2
21	cluster 2
23	cluster 2
24	cluster 2
26	cluster 2
30	cluster 2
31	cluster 2
32	cluster 2
34	cluster 2
42	cluster 2
44	cluster 2
5	cluster 3
8	cluster 3
9	cluster 4
12	cluster 4
18	cluster 4
27	cluster 4
46	cluster 4
4	cluster 5
28	cluster 5
41	cluster 5

## Sheet: raw features UHPLC-HRMS
Metabolite name	Annotation level	Formula	MS1 isotopic spectrum	MS/MS spectrum	QC_pos_1	QC_pos_2	QC_pos_3	QC_pos_4	QC_pos_5	QC_pos_6	QC_pos_7	QC_pos_8	Sample1_rep1	Sample1_rep2	Sample1_rep3	Sample2_rep1	Sample2_rep2	Sample2_rep3	Sample3_rep1	Sample3_rep2	Sample3_rep3	Sample4_rep1	Sample4_rep2	Sample4_rep3	Sample5_rep1	Sample5_rep2	Sample5_rep3	Sample6_rep1	Sample6_rep2	Sample6_rep3	Sample7_rep1	Sample7_rep2	Sample7_rep3	Sample8_rep1	Sample8_rep2	Sample8_rep3	Sample9_rep1	Sample9_rep2	Sample9_rep3	Sample10_rep1	Sample10_rep2	Sample10_rep3	Sample11_rep1	Sample11_rep2	Sample11_rep3	Sample12_rep1	Sample12_rep2	Sample12_rep3	Sample13_rep1
(-)-Matairesinol	MSMS	C22H23ClN2O2	381.13089:5610280 382.13424:1215163 383.1376:189958	51.63469:2168 57.98151:2413 85.47357:2479 97.36581:2985 129.71454:2508 165.71777:2456 381.13068:86384 381.17404:3537	43656984	44525652	44630260	44950400	46989004	47191860	47257288	46744828	3207	3883	2762	2754	4468	7538	7213	6097	7161	352152	405218	356143	7815	14041	6951	3389	10551	13726	2780	15349	3193	4372	11516	4517	6584	3626	2986	5012	3993	5496	3518	14305	4073	516228	917134	955422	4861
(-)-Pinoresinol	MSMS	C16H18N6O4	359.14914:2854366 360.15249:646700 361.15585:91067	53.03947:968 55.05503:3880 57.03441:2313 57.07082:7729 65.03959:5957 67.05506:2173 69.03432:7836 69.07077:2416 71.04967:1345 71.08616:4597 75.40012:1165 77.05436:966 77.58373:1041 79.05502:3366 79.24439:1177 81.03449:5856 81.07058:2757 83.04985:2363 85.02901:1831 85.10195:1671 91.05482:282466 95.04951:2339 95.08601:2434 97.02898:1456 97.18626:1145 105.03385:11559 107.04913:3009 125.92439:1182 206…	21212334	21371882	21574898	20561892	22676514	22490968	21841328	21955928	3259	239.196	239.196	3415	3169	2934	4158	239.196	25939	3170	9923	3034	2841	3483	3581	15534	27707	3266	17245	239.196	2392	239.196	2848	23821	3553	239.196	239.196	3029	3236	3724	2815	3673	7134	295099	231497	3370	3219
(+)-(1R,2R)-1,2-Diphenylethane-1,2-diol	MSMS	C14H14O2	215.12537:1254871 216.12872:154798 217.13208:1564086	52.05883:650 55.05504:4337 59.99094:3089 60.55038:600 66.64364:764 67.05504:1116 74.09701:2394 80.30148:717 83.08613:1162 88.02184:1084 91.05502:952 106.98961:859 128.57312:736 132.56149:634 145.9697:765 215.12486:4767	3939012	20144562	113197	15604100	9237048	10437596	8426558	20881714	123151	771152	76926	529429	751106	118034	82409	153308	761922	753049	102041	1131024	1429804	571921	4254780	1146409	1360986	769353	921364	1171054	1112930	1028159	682094	907306	640306	434316	5922956	42245060	41171212	7783990	31829422	40629160	36005076	1043968	620562	2591994	11105278
(+)-Limonene	MSMS	C10H16	137.13239:1899844 138.13574:236624 139.1391:156283	51.02375:3537 53.00316:5011 53.03952:11906 53.48167:1076 55.05513:12881 57.68096:1025 59.84922:936 63.51846:1005 65.03941:7203 66.04713:2049 67.05502:10917 77.039:1328 79.05495:11640 81.07054:9698 91.05463:4821 92.05824:1293 93.07015:2067 95.04959:5290 95.08598:4109 105.04502:1749 112.3549:1050 116.18489:1215	26677326	27382422	25822694	27253468	29342062	17473792	26862846	26376944	35805112	35120964	36311368	6193032	3212211	8847027	15511194	14277835	29056130	3590674	5239771	1703257	8472742	5376814	6143997	7270099	4151331	8769208	21034248	40803104	42094340	32678386	34185324	33978716	40281912	20542414	38874284	4553224	7375103	5316228	3825736	4783732	5956252	21241724	16048519	21433480	6521339
(3R,7R)-1,3,7-Octanetriol	MSMS	C10H14N2	163.13295:2930719 164.1363:344965 165.13966:78758	51.02375:1043 52.67164:699 53.03943:1360 53.70493:606 55.05523:834 57.07069:1008 63.92921:2036 63.94312:2126 65.03934:1283 68.4662:574 78.03363:677 79.05485:742 80.93179:2191 80.94582:1143 84.64494:630 90.04689:784 91.05467:2469 91.60918:659 92.73535:643 95.04942:2363 98.94238:1043 105.04532:846 116.96655:6573 117.05769:3254 130.0652:1390 131.50554:722 155.07475:685	55231488	58039872	27834526	32700700	33337472	30226494	33999212	58170412	42029512	25706716	3352594	36009344	1572805	33399272	26227888	7468620	24621542	26420282	25916658	22291122	53139048	26975828	29289030	22364576	51597444	31130614	6725025	29346278	35465876	6529584	27147292	24165124	26923800	29214376	23996550	7282101	21115298	53785552	26756500	17600928	28721572	11856396	27264826	56063280	16167696
(4E,6E,d14:2) sphingosine	in silico MSMS	C14H27NO2	242.21109:902598 243.21444:152801 244.2178:86945	53.00308:1202 54.81224:661 55.01862:694 55.05508:16544 57.03425:979 57.07057:1948 60.59598:624 65.03906:1106 67.05144:942 67.05498:18563 69.07052:5756 79.05485:3930 81.0704:9310 82.89767:839 83.08614:1069 88.32408:797 91.0545:2118 93.07031:2512 95.04934:747 95.08584:8570 109.10134:1928 126.25476:741 160.37724:859 174.15009:864 183.99211:801 195.47389:830 218.91702:799	13248960	12790261	13070354	13297519	6511248	13247795	13247294	13297532	7255096	8274271	7255666	6499755	12948870	13120595	5810004	12792651	13008579	6910086	12753915	6552948	12731862	12200046	12453602	12594577	6702994	12767909	12750218	5495231	8255086	7905884	6486227	12778843	6882396	7624390	6171808	6052657	12395714	2151420	6473434	6564994	7727522	7123266	1948239	12771912	12600868
(7Z)-14-hydroxy-10,13-dioxoheptadec-7-enoic acid	MSMS	C21H28O2	311.18521:949676 312.18856:248102 313.19192:39917	53.93683:757 54.47742:831 55.01864:2576 55.055:2278 55.72187:816 57.07075:26655 67.05492:1714 68.99796:1952 69.07053:2206 71.01356:1014 76.24987:841 79.05484:1908 81.07066:2059 83.04981:6929 83.42514:874 91.05493:1343 93.03429:854 93.07045:1942 95.08584:1432 97.06513:1678 107.04964:3080 107.08627:1189 109.02872:4307 111.04437:13344 111.08083:1032 121.10062:1479 125.05991:4856 135.04376:3627 153.0…	8922384	8877932	9318762	9363892	9015598	9394752	9619973	9121691	3990300	8032608	8314144	8360958	8202798	8355534	6588906	6661821	6625447	9981472	5156517	5203264	8148654	8388906	8427169	8215316	8351628	8718772	9497500	9630363	9528396	5286771	8684284	8694531	4305433	7722004	7824888	8451690	4973744	8524376	8156462	8029543	8355742	9908532	9741613	9643123	7912242
(E)-4-Octene	MSMS	C8H16	111.11716:609448 112.12051:96289 113.12387:609136	51.0239:1220 52.61707:771 53.00313:6791 53.03955:1278 55.01872:1802 55.055:2072 57.60809:896 57.93289:1387 57.9357:23769 58.93357:2147 69.30591:869 69.55345:806 70.98015:961 73.68588:869 95.09026:1018	8129626	7733421	8501719	4498371	5208970	8331312	8908945	8442825	2810390	3595606	694224	3593968	3501314	3004388	3275077	3772754	6393588	3299066	3221325	2706939	6502786	3432246	3390616	4576488	6829478	3422823	7082305	3254822	7260124	7198640	4553706	3851210	4735792	3458120	6755266	7089576	4021413	3903330	6777534	4618282	4621874	7434266	6847028	4219762	4655682
(R)-1-Octen-3-ol	MSMS	C8H16O	129.12752:622835 130.13087:128658 131.13423:687862	51.49122:493 53.00296:1381 53.93985:1147 55.05511:1782 66.74532:621 68.9435:562 69.07054:876 70.9425:3281 77.91388:596 80.06763:539 88.95288:1569 104.48782:542 106.96329:609	7642568	7986666	7860146	7801406	7550458	7551121	7681944	7529072	3136450	3178517	3366725	2957956	5537988	4304207	3100958	1270466	3568497	5879294	3429914	6122645	3327275	3668403	926342	6301218	6737882	3472147	6462206	6474599	4234674	6482816	3866981	4077846	5370650	3628385	6112102	3628900	6717448	6669592	6707618	6377711	3910511	6541876	6466816	4179363	5619986
(S)-9-Hydroxy-10-undecenoic acid	MSMS	C10H20N2O2	201.14847:1836407 202.15182:580382 203.15518:161769	51.68813:553 53.00304:1687 55.05502:3190 55.93514:3307 56.93562:1458 57.03437:7566 57.06826:1012 57.07077:14464 60.37559:613 67.05494:2346 67.93567:1438 72.93774:3140 73.04589:618 73.44137:806 75.04456:623 81.07022:758 89.0601:889 90.94797:1505 91.67008:753 95.33115:708 128.06207:696 135.96175:633 136.28531:827 140.59085:884 201.14864:1772	15203447	15414940	15516013	16174751	15302435	3443995	3376600	15560731	28480128	28631868	29047990	8143541	19694006	8442859	3926088	1239570	1226911	815812	2330334	2374675	4052790	1240489	1052442	29711046	9639657	30072510	18648688	18473000	18495596	2846941	2504142	1559943	13464359	13495631	13552425	6726237	6766818	6916811	5726893	5775627	5758182	9767754	9861374	9927274	9196169
(S)-Homostachydrine	MSMS	C8H17NO2	158.11755:40861152 159.1209:3756205 160.12426:1520756	53.62487:22026 55.05515:42863 56.05042:182842 58.06602:633000 65.03954:39315 67.05492:103660 68.14908:25127 70.06583:154175 71.07362:112504 82.06554:39720 82.45643:25536 84.08144:50273 94.50603:26560 97.00788:30751 97.56256:26595 98.09689:243440 100.92953:27557 109.39447:26335 141.19954:33091 158.11763:486150	363011488	4478738	360568704	363341536	3440802	367890560	361892640	363641408	552301312	546271360	550854272	32152538	33657732	30886272	159808720	158954416	159780768	930877376	923268288	925072256	78438976	79373648	78947072	3967182	2080231	2684303	38575608	38587220	38332892	8849022	5196626	7987367	1540477184	6998687	3668583	487653696	483835168	485580896	1311326	20981572	22037400	70909880	68916928	68937728	102187344
(S)-Reticuline	MSMS	C19H23NO4	328.15182:2723472 329.15517:445022 330.15853:0	51.25634:722 51.54124:853 57.03432:1140 58.04833:1040 60.08159:11032 71.04989:5411 71.07358:5177 86.09695:38043 86.10212:2343 89.06031:2578 92.02324:1014 96.30635:1118 98.98448:4149 104.10744:33901 124.99988:22102 145.08594:3111 184.0732:21426 213.36627:1095 328.15125:4758	12635793	13020616	12520083	12828757	12936069	12748161	13244089	12877627	13722030	13792857	13577136	18073372	18268798	18553448	15459294	15335533	15589802	19631644	19381034	19380262	17533708	17326816	17264344	15244438	15386967	15784818	14843294	14780517	14414668	16932298	17179886	17309032	7383880	7508244	7434696	15969532	15280312	15574289	15195985	15044840	14995592	16563230	16198157	16157715	13472718
[8]-Shogaol	MSMS	C15H22N2O3	277.17978:3534743 278.18313:692748 279.18649:483158	52.25532:2401 55.01854:2606 57.07077:142073 76.58843:2115 90.07247:2355 91.05426:2768 91.55117:2305 95.04947:6362 99.16672:2471 105.06997:3537 107.0494:4555 119.08571:3060 123.04435:5811 137.05971:7668 156.93817:2531 161.09502:2970 163.07524:3414 179.10687:15382 214.83603:2600 217.15948:3287 219.13795:5815 235.16911:51597 277.1796:28939	47085904	49327200	49853872	51102188	47308260	18115748	14717032	46244976	1220428	2167749	2167283	72780064	7840112	1244616	1247194	1681393	2242306	1335696	2225171	23038276	21345256	35053528	59086152	38017560	67635648	16395343	37792808	37371092	16200907	34767504	20390610	36050084	4538919	3467172	20516046	29919912	34359796	31441462	67643648	55840824	24984104	20639346	19824074	17439636	12775201
1-(beta-D-Ribofuranosyl)-1,4-dihydronicotinamide	MSMS	C11H16N2O5	257.1131:6114371 258.11645:861535 259.11981:208867	50.93432:3708 51.77569:3032 53.03949:54419 54.03478:10547 55.01861:13554 55.04233:4133 55.05508:6506 56.05028:5394 57.03431:5491 57.13528:3186 66.03442:5947 66.0471:4595 67.04261:5135 67.05485:3716 68.05019:5388 69.0344:22321 74.76083:4081 80.05015:97066 81.05808:28668 82.06585:70955 82.34801:4237 85.02888:7316 89.81033:3650 96.04482:18290 97.02877:6249 101.20947:4387 103.90072:3894 108.04479:246…	23553586	22991994	22643600	22959636	21852880	22247198	21211414	21720774	26386410	25766056	25576204	25076590	25253502	26132676	110596	24293844	24423926	26797156	26502528	26441830	25600442	26054710	25598082	21330210	22089168	21565336	24042440	24051198	24061364	24902058	25019814	24434520	22508710	22547752	22424794	24907510	24989412	24991426	21876172	21692212	22183410	22093258	21715010	21937480	22793166
1-Aminopyrene	MSMS	C16H11N	218.10231:184314 219.10566:0 220.10902:0	53.03936:1357 56.05038:864 56.91879:791 65.03939:1239 69.8149:660 75.98133:767 79.05473:1981 79.48515:661 91.05482:1851 96.04474:1642 105.05752:786 105.07037:1125 106.06556:2469 107.04919:2853 111.04452:1016 117.05704:754 118.06529:2643 119.07339:1105 119.56779:835 120.0808:2247 122.0603:1973 129.06978:1033 130.06566:969 131.07301:2173 132.08083:2007 133.05238:6308 134.05992:5768 134.94189:794 14…	1989433	1979355	1959705	1431831	1605763	2162986	1767057	1823683	1217253	928490	622516	2765934	2829630	2703084	768897	226930	645731	863402	1542716	563001	1151225	1154498	2118996	1660138	1574267	1251542	1485403	1059263	1948134	2020366	1948383	1803352	283529	233122	220755	1019590	1564737	1173096	2314334	1974094	2230278	1856117	2155659	2132026	1886623
1-Benzyl-1,2,3,4-tetrahydroisoquinoline	MSMS	C16H17N	222.14616:1028611 223.14951:260145 224.15287:29718	59.27783:791 67.0548:853 70.94241:1229 75.71693:865 77.41808:672 90.46276:703 91.05455:1966 94.94247:689 112.8956:792 152.38326:751 178.11501:863 222.14604:2705	14278174	13840081	14962448	14203207	14765235	14509477	15081067	15315925	7736473	13606991	13904162	12045697	11863652	12532762	14124130	7655764	13987535	7221711	12349414	12092102	12041855	6591891	12581598	7898286	12345327	12654053	14129094	13932654	14161490	6890823	14240080	13843291	14613604	14341006	14588527	7967682	12723352	12419990	12621240	12399935	12524827	14592060	14439608	14265537	12991459
1-deoxytetradecasphinganine	MSMS	C14H31NO	230.24808:1742298 231.25143:310964 232.25479:0	55.05505:2832 56.05846:1081 56.99409:834 57.07086:6108 58.06603:88316 62.06087:2510 62.29913:827 62.76635:976 67.05486:2369 68.53719:930 69.07064:1092 71.08625:855 78.18856:896 81.07053:1186 119.15234:1006 137.40601:892 149.07216:883 160.17723:926 184.56821:981 195.40518:884 203.50555:981 212.23776:1137 230.2485:7170	12186941	12429007	12686213	12386276	12405024	12555965	12381326	12361980	6861452	6962134	6571803	9556008	9297251	9605847	6425854	6433998	6556894	6740294	6518646	6464907	6559106	6463340	6470090	7790997	8136684	8003485	6458082	6771412	6528268	6153832	6403720	6070276	5715582	5743972	5765771	6262212	6081510	6087748	7391054	7744337	7496372	6707206	6787460	6716441	3269690
1-Piperidinecarboxaldehyde	in silico MSMS	C6H11NO	114.09158:34070568 115.09493:2677572 116.09829:293274	51.02378:26232 53.00303:28423 53.03941:35571 55.01875:51041 55.0552:104667 55.93512:32224 63.52528:17067 69.07048:32573 69.77197:17565 72.93777:40241 73.45006:19264 79.05493:41008 88.4855:21744 93.6321:16421 95.04941:24176 96.08162:19151 114.09137:89716	1099554176	665597760	657024768	582754048	553625856	654575104	587920256	1162669056	600774592	622617664	697342848	2589660	5273221	845690	567466112	12259334	67172416	3269797	3109364	1239418	4602951	2189106	2984423	2275488	7956054	1284839	868499584	758272640	89829128	802744960	873491648	798044288	715580224	691250560	506651936	2730670	1589878	909900	1192833	2020871	1367998	569656576	784099904	785976000	3149254
1,11-Undecanedicarboxylic acid	in silico MSMS	C13H24O4	209.15353:856804 210.15688:124929 211.16024:94137	53.00302:728 55.01872:1103 55.05512:4611 56.46909:624 57.07077:8144 59.04985:2930 59.63109:632 59.93109:2096 62.53923:669 63.8627:687 65.03942:1220 66.44472:655 67.05505:5098 68.99783:1035 69.0705:1307 79.05478:4249 81.07043:2092 84.48941:835 86.913:854 91.05479:5414 93.07034:2902 95.04965:1681 95.08597:1024 103.05428:876 105.0703:3834 107.08566:2212 109.06478:826 116.07256:719 118.96711:1735 119…	14431720	13757784	15638607	16018139	7324423	15796594	15996954	15230588	5521488	3261334	2776677	994933	2670274	4716311	3726728	3021752	9908743	6360313	9966138	7568976	4204546	7968488	4384966	1919720	7047996	5061588	7129479	8611723	3877272	12600330	7032126	2369834	14571188	6985178	7220120	4295580	12873525	13708141	2644706	8476213	12301425	6099094	8241060	2390538	9836085
1,2-dioctanoyl-3-methyl-1,2,3-butanetriol	MSMS	C19H39O6P	395.27725:3384576 396.2806:814199 397.28396:122454	51.86612:1255 66.06936:1255 79.05539:1265 82.81252:1413 95.08636:1240 114.27911:1213 151.34673:1285 335.99988:1349 354.27029:5968 395.27731:79759	24018944	35709012	24541320	8034861	11475330	39149332	30538198	4206252	184220	122077	288513	106751	148054	134370	173313	34631	45224	89535	79360	41117	44921	43565	2978422	720227	11761948	1166401	77047	1092106	74276	6252319	6773110	3867500	1519691	902854	618658	896285	7994162	478906	2826602	4966238	1364135	5560071	5667798	697355	2244312
1,2,3-Trihydroxybenzene	MSMS	C6H6O3	127.039:8871134 128.04235:520383 129.04571:0	53.003:7290 53.0394:18814 55.0186:14580 56.61868:4571 69.03426:9837 70.24203:5999 75.26337:5170 75.5991:5486 97.02892:13545	59638468	62160548	57389864	56931084	53985352	55750932	53758596	53950608	24696018	1814306	546722	54638476	57051872	57475452	36906620	38306628	37369292	713297	65416096	63157216	55189140	53989284	53305664	58474848	60597848	59695076	39938668	39915136	39543168	67994512	68550376	71909280	58624688	59367796	58025000	56849488	57557380	54930532	89977216	89507912	87099424	40751772	40134764	41859024	28091634
1,2,3-Tris(1-ethoxyethoxy)propane	in silico MSMS	C15H32O6	309.22705:1432858 310.2304:238090 311.23376:45543	53.00296:1347 53.0429:990 57.03423:3189 57.07104:981 59.04999:71888 67.05502:1217 73.54369:1005 74.1619:1187 79.39908:1031 81.07054:1046 117.09119:1712 118.6003:1025 307.69485:1157	28039852	28201182	27979432	14503337	16399061	14577580	27975950	28914714	11775546	23534546	9612264	41080560	19881348	18690948	10608387	7591081	12865218	16248769	5074412	16834068	18914522	36638692	16730385	19822510	18452280	20277538	20540688	12247363	10542463	4017312	11978678	10065047	3821905	9956489	21156734	4801440	37429604	22022048	37089608	19711852	18855140	11529390	21381330	11797031	32843000
1,2,3,4-Tetrahydro-1-[1-hydroxy-3-(4-hydroxyphenyl)-2-propenyl]-7-methoxy-2,6-naphthalenediol	in silico MSMS	C20H22O5	365.13602:1434295 366.13937:294461 367.14273:15758	57.07058:806 71.1971:924 73.08727:927 73.81464:858 75.53644:929 78.30362:866 91.18446:996 127.1108:1027 167.59569:1143 231.6981:1237 286.92596:1094 365.13596:13000	13887734	14777244	20286676	15801891	12568408	14185916	14836203	1816045	3242567	2248442	6967687	9331802	6171934	9116605	10589947	2513815	14407658	12237949	11353954	10467983	11442485	8617522	14209235	859517	10551336	759966	492431	12342174	654586	13730955	11842879	979082	11295550	8873874	12221591	12632860	13457309	3591084	6438003	2952497	11591377	10912026	16734226	12077195	10624441
1,2,3,4-Tetramethoxy-5-(2-propenyl)benzene	MSMS	C10H16N4O3	239.12773:620015 240.13108:87524 241.13444:32929	53.00299:1014 55.01875:5324 55.05507:3188 57.07075:12796 59.58361:819 67.05495:3693 79.05476:1072 81.07056:2508 83.04999:2107 83.06115:1328 89.4079:683 91.05473:2815 92.17996:737 95.04971:6130 95.08594:1739 97.62373:768 100.24522:873 104.80378:788 105.07019:1259 106.41027:776 109.0649:2181 119.0485:1109 120.17071:926 125.05946:1221 126.46213:732 129.0549:1072 137.05984:3618 147.4306:757 177.37311…	2040133	2422212	2686794	3407051	7255821	2662984	4680811	5037830	731490	843976	3057588	1019634	1771496	4641972	1102097	3976930	888890	5455492	4208382	673462	1242437	2964233	996864	5490962	1867398	1262024	1752972	2638299	654308	1129532	6348972	3716490	1986188	549268	4366388	1467683	1724037	2671750	879216	130110	2592006	2518496	499238	1720246	1389918
1,2,4-Trimethylbenzene	MSMS	C9H12	119.08551:890339 120.08886:120981 121.09222:143735	50.016:2315 51.02385:7757 53.00302:2532 53.03947:3952 53.53196:487 54.50364:634 55.01854:504 58.06595:465 59.06936:667 63.02372:833 65.03943:12115 66.25941:656 70.1714:581 77.03915:2640 78.0472:4362 78.07295:630 83.12663:572 86.43211:672 88.90508:581 90.1281:585 91.05478:8154 93.0649:570 95.04967:5275 103.05464:3806 104.0623:708 105.04538:1039 115.05415:912 117.07027:629 119.08572:2024	8098106	8054711	8468370	8510941	9688236	9556628	8902267	9740140	7220900	8030100	7752874	1284628	1282105	2338916	2788051	2610055	4479814	13090699	12662004	12760879	13270849	8205818	13885413	18730026	19480506	20393484	3449277	6410608	6155653	6114944	3919480	5100778	6668144	6593024	3963395	16051013	16280724	15537007	16183961	16571144	16358108	5872872	3396580	5881288	16594364
1,3-Diisopropylbenzene	MSMS	C12H18	161.13249:97523 162.13584:0 163.1392:244079	51.0238:2352 52.34485:807 53.03947:7915 53.16454:973 55.0186:1154 55.93528:1070 56.05032:1475 56.94299:1382 58.19802:743 61.79258:719 61.92825:886 65.0393:1976 67.34335:856 72.93774:3312 73.9383:1201 77.03926:1557 78.04697:1460 78.93133:1226 78.9503:1183 79.05498:4452 84.08125:1770 86.94171:937 91.0547:11848 91.84911:917 93.07027:1629 95.04966:10341 102.04705:1593 103.0547:11474 104.2561:1039 105…	680124	505531	175206	965415	290523	197423	281892	579596	331171	188383	201301	348833	97182	180912	338403	291024	217819	347350	297676	331304	197365	200018	236134	231420	230213	4168129	219103	341488	230972	495416	163553	155945	184781	232318	184334	218664	459689	259976	201076	121138	193307	338625	360392	136780	181434
1,3,7-Trimethyluric acid	MSMS	C8H10N4O3	209.05988:86790 210.06323:13862 211.06659:0	53.03947:3519 55.01874:2386 55.05516:16416 55.46687:1466 57.07079:19912 59.04985:2742 59.93108:3321 64.45303:1556 65.03922:2712 67.05488:7569 68.90341:1444 68.99792:7521 69.03429:2877 69.07057:6863 79.05493:10081 81.07072:8367 83.0499:5369 83.08611:2084 86.87476:1625 87.67371:1369 91.0547:11928 93.07051:3782 95.04961:6989 95.0861:4330 103.05489:1898 105.07039:8959 107.08615:2521 109.06509:4890 10…	355656	30612	27248	47058	709697	26417	31248	485255	16185	52583	17748	619856	318425	16210	15083	41698	21835	22310	607179	285173	713443	302601	522295	473717	637081	339929	25516	14894	17628	14751	13115	11977	12752	18463	11223	183328	448600	11898	783946	1603008	1549102	26732	12681	15926	1058864
10-oxo-nonadecanoic acid	in silico MSMS	C19H36O3	313.27344:779556 314.27679:161462 315.28015:40716	52.64679:756 55.05513:5320 57.0344:6591 57.07075:18496 67.05502:5716 69.07047:2697 71.08622:5645 79.05444:1000 81.07038:3426 83.08595:1346 85.10159:2240 89.06013:948 91.05473:1679 95.08584:4434 109.10114:1116 128.26999:908 210.8324:888 313.23535:3813 313.27359:5973	3463927	460090	10593607	21566800	37915504	4814995	6615602	5213790	11421644	11105572	3447983	7613082	10790052	8019334	12118511	3109038	4178036	9652895	28993328	438309	9138592	400461	1997109	7850488	26521530	367910	7774396	6443952	13917246	17133918	121264	635550	12019598	18895582	1304378	39363684	2755626	6394833	6042510	194672	2108726	3254368	251084	6026380	36643212
10-propyl-5,9-tridecadien-1-ol	MSMS	C16H32O	239.2368:3012885 240.24015:582076 241.24351:30169	52.5968:1800 52.91324:1761 53.00296:3425 55.05517:16900 57.06819:3492 57.07079:45419 67.05502:24839 69.07027:2436 71.08607:5594 75.55759:2057 77.96814:2142 79.05514:4166 81.07043:10628 91.28815:2003 95.08596:7690 119.69199:2102 141.1497:2021 191.10307:2338	3519741	37226464	2810968	796321	1486013	34484856	9076771	36621724	2062096	2702505	1455586	586883	1737285	3544783	2207284	2363545	1411143	1341970	132371	1742838	1613322	2745412	2155471	1648307	84168	3008740	4638216	886101	790216	584214	581127	3469576	11187506	3250436	844054	854801	1200509	1500123	1977244	1121094	1003075	1392357	1882898	1688446	3268618
11-Hydroxy-9-tridecenoic acid	in silico MSMS	C13H24O3	193.15858:2354226 194.16193:371968 195.16529:135986	53.00306:2637 53.03931:6469 55.01859:4823 55.05512:15593 65.03932:4120 67.05505:29094 69.07072:1963 79.05498:20604 81.07057:11675 91.05476:26806 93.07029:8911 95.04951:8421 95.08598:7943 95.44537:1694 96.27557:1667 105.07014:10233 107.08565:5378 109.1016:2235 119.08569:4881 133.10138:1869 150.22501:1875	36210296	37382508	36581184	37050216	38265152	38917420	39620544	38786696	36816276	36381048	35788268	36512732	20935962	35795940	19082320	18868774	34494868	35071092	19442332	35051956	19989004	33289398	34166960	17435020	34258500	19308018	35238384	37131464	35790372	20504992	18330152	35362892	15034624	36619412	35357200	34886216	15652671	34576788	34957328	34991304	18507962	16639019	35284732	34900268	35249036
12-aminododecanoic acid	MSMS	C10H23N3O2	216.19604:860311 217.19939:112416 218.20275:32847	50.95378:575 52.9308:581 53.00312:728 53.03944:1048 55.01864:2135 55.05518:22248 57.07066:3132 57.47471:729 59.63013:604 65.03451:711 67.05498:2813 69.07058:5579 72.04497:772 77.97661:799 79.05495:3457 81.07066:2271 83.08614:1646 91.05475:1863 92.90022:4296 93.07014:1152 95.04955:851 95.08607:1342 97.06471:1003 100.07633:732 107.08593:1013 113.75803:731 123.23304:708 157.62634:889 173.08374:1018 …	1175888	1218246	1194817	1136585	1184940	1240693	1295902	7288938	61324	50960	68687	2359607	109716	2366478	104641	67238	94544	147522	1750153	186402	86544	1959720	2025487	114720	2392796	2355074	61149	106540	190436	208843	83461	123978	62090	96827	84005	2673254	2663488	2548104	2672678	2568555	2651178	74589	91313	129423	2640298
12-oxo-cis-dodec-9-enoic acid	MSMS	C12H22O3	213.14867:2355439 214.15202:292827 215.15538:582875	50.57067:2236 55.05516:37733 59.05003:23024 63.49968:2413 64.96812:2780 68.21171:2646 69.07068:52411 73.06535:3545 83.0499:6960 88.49855:2680 97.06561:3859 111.11718:10350 134.51804:2811 188.45009:3086	29019004	29183082	30112712	30694884	16955802	16850832	15459718	30930822	48040220	47321512	48409832	6572637	2972632	2535728	35606792	34772220	34289776	3740796	4019170	5134230	6091502	3616154	3684382	1466166	4729702	1816438	48608644	48825020	48512568	21435840	40932752	41436752	44285068	23344546	44147496	1325258	4761564	4295601	1142109	2222729	4704370	38702432	39390596	38762400	7694646
2-(3'-Methylthio)propylmalic acid	MSMS	C10H12N2O4	223.06375:790045 224.0671:123993 225.07046:143803	55.05497:1676 57.07069:2026 59.04998:1364 59.38424:742 62.99053:951 64.04314:686 65.03933:1965 67.05512:977 73.04739:1929 75.97329:980 79.02157:1029 79.0547:1196 81.0009:2091 91.0583:8907 91.33632:712 95.01627:1260 95.05019:776 117.77126:739 149.02301:1600 155.01878:1634 165.07083:1135 169.03485:4047 171.01413:3686 196.97487:1393 198.98965:833 207.03134:921 209.01222:1404 214.98622:2917 223.06442…	7443410	8065740	8396657	8131738	8889143	9329319	9108177	9599878	6142546	7152354	11389800	4047848	7565454	7756452	2755434	4432769	4127782	7645807	7193842	7774781	7708966	4176260	4395417	8024154	3847990	3669469	7059586	9176278	8307960	3686132	7916539	7777438	4757197	6911510	7041117	7217656	7865487	7641692	7378794	4121203	8711949	6641774	7205349	7593024	3963800
2-(4-Methyl-5-thiazolyl)ethyl isobutyrate	MSMS	C8H14ClN5	214.08974:1073678 215.09309:676531 216.09645:77301	50.01588:1535 51.02185:845 51.02387:10286 53.00317:732 53.03954:28070 55.01879:1583 55.0551:2463 55.93538:5117 57.07066:2861 61.88611:662 62.77894:580 67.05521:4021 67.71336:734 69.07079:860 69.41306:816 70.52392:743 77.03936:7769 79.05482:848 81.03397:2465 81.07086:1004 90.90379:12228 95.04969:50714 95.08611:1616 105.04514:12552 108.91401:2015 141.00056:3599 158.02727:1953 214.25351:1216	13175673	13346036	13131370	13708831	14013093	13501141	13213884	6851704	12156692	5490582	11887802	11342676	6573612	12002721	12278788	6353449	6151336	11557348	12256422	11570188	7865778	12255642	11555579	6561030	12773263	6747702	12470912	12158408	12528936	12437462	12069915	12489077	12700211	12832349	6199610	12833414	12797320	6091664	7564757	12821186	13054690	12252274	11570418	6681152	12905220
2-Aminobenzoic acid	MSMS	C7H7NO2	138.05492:77044288 139.05827:5737994 140.06163:805085	53.00292:39440 54.23671:37330 55.01859:47358 56.72294:37293 68.05016:75096 69.03429:83752 82.97018:39879 89.92663:49526 96.03928:51996 96.04457:207341	579552256	1564073	587428800	587837056	599192064	599629056	5802871	5487472	592390208	589372544	589370880	783305600	787984000	775571072	408046208	406430816	400486272	560288448	556975616	556308672	612937536	608034688	606457216	668141	601726656	606721600	597808832	597756224	594737216	623355200	626028224	620531712	479760416	476639840	478430688	460132	559059840	556274176	617493	438018976	440445056	449813504	452067840	449810624	2107754
2-Diethylaminoethanol	in silico MSMS	C6H15NO	118.12263:349084 119.12598:0 120.12934:290137	56.05025:102094 58.06599:6047235 59.07372:249524 60.83839:55837 64.59821:70511 72.08163:64745 81.52308:59622 85.69226:63076 104.40092:56546 107.27322:61322 118.08639:279656	136213	88655	2269190	359180	931368	33947	1483823	89668	438170	93356	280239	1265961	119537	303668	106789	95315	2565178	126164	229826	133240	1339134	323762	302871	36521	237401	439493	88785	253599	246132	435961	234339	3094870	678710	62006	50721	1847333	1195043	947819	59151	369645	334230	266318	1506720	154174	390658
2-Indolecarboxylic acid	MSMS	C9H7NO2	162.05508:1801495 163.05843:250395 164.06179:111912	51.02377:1111 56.96558:1296 58.22036:656 63.02382:13857 64.01884:795 65.03944:2304 75.02367:2298 86.02724:676 89.03918:89333 90.03444:1937 96.04323:751 96.89679:749 99.02354:945 100.01861:3411 115.96988:1136 116.04981:40817 118.06532:1058 126.03383:1650 128.4021:754 132.05289:1139 134.06003:1300 139.29623:756 144.04474:5465 144.05455:999 145.10017:775 162.05508:19181	17701886	18391980	8769291	10344488	18355812	13600191	17610898	17865624	902893	5995190	5043986	3897472	10712903	7353025	21473782	852074	1385355	4590038	22723414	9983569	19121750	10228048	19904542	22077434	11298687	22437610	10660172	23496630	12223628	7956930	1340939	8892134	2526378	6952838	2853691	19072508	1170752	10994371	12925929	255234	15597340	13368045	13207391	7308212	15868023
2-Isopropylphenyl methylcarbamate	MSMS	C11H15NO2	194.11766:351055 195.12101:251397 196.12437:96873	53.03938:3191 58.06588:4662 61.57564:727 65.03603:1617 65.03938:28487 65.36148:667 65.53715:650 70.94268:916 76.03993:4949 77.79433:650 79.05493:2500 82.93388:1319 88.95264:757 90.89029:741 91.05472:183825 93.071:783 95.04969:4941 105.04508:1584 107.04947:23788 118.95478:1343 135.0444:5203 184.78125:851 194.11765:2064	1924378	2786882	5513910	723871	2891763	1054625	3222158	728808	1574847	682308	701296	1307188	814563	525988	732138	827836	6262882	833531	5938452	1039431	3816940	752886	619488	636032	1227080	2766535	2249247	2149072	1902874	1900984	1054841	1544354	1959387	616805	912022	602228	2386352	747061	896922	865218	916739	2269123	1870353	1045442	2593905
2-Keto-6-acetamidocaproate	MSMS	C8H13NO4	186.07625:981726 187.0796:130599 188.08296:169608	53.00321:1064 53.03955:1167 53.20394:629 55.0188:733 55.05501:1109 56.05042:4279 56.94308:817 56.9636:498 56.96573:5497 57.03439:1771 57.0707:2084 57.31281:735 58.06583:631 59.36764:568 59.94125:1748 63.12903:686 65.03937:3281 66.19728:797 67.05173:1253 67.05508:14857 68.05026:1675 69.03431:1231 70.06584:2320 71.0499:837 72.04517:1131 72.93789:1046 74.06081:872 75.48051:704 79.05461:850 80.05025:…	1605948	357367	305810	362552	6554793	1028016	6057702	6708290	103745	82957	87336	99545	151534	230946	203186	78224	51729	87529	93401	157348	111299	169656	107512	237280	152682	175473	96185	220194	98496	51164	66229	100550	121489	1903542	109470	132632	206326	167029	145337	225318	5338016	162255	85373	73533	1047119
2-O-(beta-D-galactopyranosyl-(1->6)-beta-D-galactopyranosyl) 2S-hydroxytridecanoic acid	in silico MSMS	C25H46O13	596.32812:728645 597.33147:233924 598.33484:45101	55.0655:1069 61.94579:1064 63.60969:1234 78.54549:1185 84.09361:1358 85.40714:1085 99.04465:14296 102.55235:1275 118.83437:1341 152.68719:1215 155.48001:1283 184.18597:1307 232.30002:1364 259.7962:1698 596.32837:18732	5247494	5392402	5103358	5152182	4835094	4912281	4778203	4648918	2639	4605	4710	13838273	14057797	13737302	238.689	238.689	238.689	8314504	4744814	8692014	12709981	13051058	13616327	15351042	14990508	14875179	238.689	3179	238.689	2809	238.689	3705	238.689	3166	238.689	16615561	15913348	15805459	15882793	15640244	15628442	238.689	2996	238.689	13771557
2-O-Methyl-L-fucose	MSMS	C9H17NO5	220.11794:772422 221.12129:141382 222.12465:41803	54.18683:583 55.05516:944 56.01386:973 57.07061:2573 58.50914:620 59.05001:781 63.19568:560 64.06149:662 65.03951:784 67.05489:2892 67.65367:692 70.02949:4258 72.04512:1053 76.79289:824 79.05505:1200 80.04957:802 90.05538:3177 91.05455:2087 95.04957:1603 128.75702:779 135.06688:853	9244464	28559	10354691	65150	45383	56272	20854	37182	1207292	21266	2190529	2385687	12717226	2327431	4910564	22902	1613499	4864448	4241208	3332960	1391969	42942	2423803	3087711	6935082	42218	5199147	590408	2349398	30464	71689	6162721	45994	37028	39065	25032	14077	36143	15284	78345	51427	28491	38371	53762	10778
2-Phenylacetamide	MSMS	C8H9NO	136.07588:3499827 137.07923:672342 138.08259:366504	51.02377:4296 53.00295:2297 53.03949:1812 56.09081:1246 62.01617:1195 63.02367:4174 65.03942:106757 68.98008:2378 75.63556:1294 79.05492:2398 80.239:1313 91.05479:103429 93.05755:2028 95.04925:1670 96.04426:1794 106.06516:1733 109.01085:7030 111.72266:1282 120.08087:5429 121.08901:2609 135.35284:1457 136.02129:3939 136.11176:2040	14607908	14678935	14948823	15531695	14797124	15121908	15558954	15187790	11101418	10402302	10910466	17121204	18062206	19431318	8649127	8337320	8366675	14538651	13918395	13865836	16350335	17019404	16388855	14263855	14715423	14410675	12416211	12684483	12015279	13259273	13387595	13001103	16205546	16481092	16820428	12122486	12395278	12353724	14058255	14329663	14257851	12704822	12396555	12356802	14824810
2-Phenylglycine	MSMS	C8H9NO2	150.05849:2505514 151.06184:321072 152.0652:381138	51.54023:761 53.03941:1040 56.05041:29045 58.99575:1309 61.01155:53340 63.92932:1027 65.03937:1647 66.04268:1406 70.36133:727 70.99548:1322 72.00342:1290 74.02437:1947 87.02685:985 90.94846:821 95.05004:1136 104.05302:1655 106.06516:1622 110.11596:949 133.03157:1187	12947265	12854269	2195936	18407896	12531075	13159792	12975866	18840180	19619816	10121724	10160258	17186246	18112672	16961886	23193086	22986962	23532540	12217204	12481321	21647488	19025142	13790828	13278149	11402454	11462633	11558841	19768104	11532923	1366554	14173255	13972909	14114610	16265470	16018747	6328338	10281085	10165608	20704620	12625018	12697084	12420711	13153906	20044564	20203470	12171816
2,5-Dihydro-2,4,5-trimethyloxazole	in silico MSMS	C6H11NO	114.09147:2427794 115.09482:308960 116.09818:177823	53.00304:2964 53.03948:2111 55.01862:1795 55.05502:6863 55.93304:1385 55.93528:19616 58.99809:1529 59.52186:3942 63.92928:6143 68.527:3246 69.07066:1829 72.93784:25376 78.69044:1712 79.05513:2328 80.93179:5659 90.94805:6635 109.12202:1499 114.09129:4333	26662656	23872886	8878604	17805034	30579148	28514772	10409745	25025620	13502665	7550560	8106108	1033625	1223105	1173769	3199750	3257632	4068278	2703410	3408938	1095209	1839861	1464373	1944911	1726373	1208182	2190087	13227384	28251294	23408946	24205782	15704660	7210836	16383630	13758962	19336484	2758116	1373874	943048	2721191	1938090	3593938	17173618	12316224	24456316	4955338
2,5-Furandicarboxylic acid	MSMS	C6H4O5	157.01329:7123208 158.01664:760523 159.02:158949	52.09867:2283 53.00307:7868 55.01877:44012 56.96577:14544 68.99792:145499 73.60804:2518 74.93816:4797 95.0856:3126 96.9778:3142 97.60971:2499 111.00777:9859 118.09713:2677 139.00237:4448 140.80574:3202	68318848	67432912	68201728	69200840	66556028	67502648	66685080	67824776	10347959	10426134	10116606	18332038	17743260	84973880	35339708	10784541	33528620	58575672	34700940	20045996	51780428	17454480	52204336	15224967	14905020	15418436	16411755	15396365	40686272	63849432	64510576	63585464	8712832	17446644	16830118	39210996	14632456	15226900	16282772	58794780	58013740	59937316	60254884	60913180	69482512
2,6,10,10-Tetramethyl-1-oxaspiro[4.5]decan-6-ol	in silico MSMS	C13H24O2	177.16373:833206 178.16708:165975 179.17044:75576	51.69905:672 53.00305:2063 53.03942:5501 55.0551:8133 55.93534:871 56.96556:737 57.27714:761 58.27164:760 59.04992:1316 60.12665:630 65.03941:7503 67.055:5976 68.1563:665 69.0704:1643 72.93776:1157 78.95341:639 79.05486:10236 79.57877:675 81.07047:1771 87.78114:687 91.05475:17450 92.06255:970 93.07041:5281 95.04962:6109 95.08611:2614 98.97643:759 103.05466:1227 105.04503:1641 105.07021:2997 107.0…	10291113	10280594	11650262	11548418	12224082	12478908	13210353	13597995	4895962	10109035	10073909	9872483	5330252	5584819	6778899	10842173	10675716	1366804	5590602	9321154	9407278	9547621	9358874	4460124	9733448	4964784	9921920	10557317	5573632	5251800	9679307	9525581	9861094	10333189	10410568	9386637	9415196	9671376	9540481	9356459	9513360	5881106	5641348	10097453	10044682
2'-O-Methyladenosine	MSMS	C11H15N5O4	282.11984:2033951 283.12319:271070 284.12655:0	57.03428:1897 57.04555:1445 57.17747:1278 59.67431:1069 60.01357:1170 79.19897:1163 94.04041:3560 109.05119:10979 119.03562:1688 123.0674:1343 133.0509:10063 134.09654:10681 137.04581:1519 150.07748:237018 180.70679:1500 186.20256:1565 234.77881:1563 244.35182:1604 282.12018:3634 282.22235:3950	12398991	12264351	12152478	12488073	12995885	12306971	13018126	12710929	9015606	9313632	8875450	10030792	10395339	14680234	8748306	8909536	8652817	9535636	9685924	9552649	10219095	10182138	10041689	4231480	9077239	9267686	10272847	10729888	10349132	10994218	10695587	10685252	13668637	13461144	13741308	7797122	8246583	7976709	8664672	8576231	8964369	8664108	8927509	8753115	8670013
2(N)-Methyl-norsalsolinol	MSMS	C10H13NO2	178.08627:1080757 179.08962:462054 180.09298:0	51.02387:3801 51.36988:2666 53.03949:2940 55.33652:3094 61.81054:3319 65.03942:3931 72.99876:7894 75.10645:3995 77.03928:23603 79.05495:6841 87.08418:3388 88.02195:9485 91.05463:4315 95.04958:4701 104.05:7667 106.06537:3692 117.05772:6608 124.07599:8888 130.81529:4627 132.04465:12861 132.08095:5435 178.08633:24948	8592052	8384890	8042044	8516114	7795176	8593405	8232905	8487845	8241531	8503568	8419391	6448670	5328500	6422946	7318719	4169321	6921030	10028803	10010034	10366869	5368998	5297220	4893150	5487620	5293313	5666518	10293378	10135689	10407396	8410491	8436869	8827313	6111676	6155476	6132348	7801053	7735334	7712254	6191620	6331913	6044980	6127614	6668472	6475724	12051672
22:2-Glc-Sitosterol	MSMS	C58H102O6	895.73608:1908607 896.73943:1242909 897.74279:998213	78.81937:1723 84.73797:1700 98.82365:1719 102.80278:1695 117.34344:1627 133.08653:2037 142.50166:1824 194.75468:1928 269.54797:1936 309.27805:10393 310.28357:3675 319.22452:31314 455.03494:2241 613.48206:10323 639.49982:15078 895.73663:476744	1117811	5722914	640525	8764871	3577091	5789918	5730264	8522414	43812	532577	665225	776969	582663	740915	771113	844954	824266	2710607	487606	848842	748579	1039778	27843	1121460	486324	639030	1360658	804746	1032898	845568	1154992	762432	4982591	780229	680546	1133626	46772	697837	302444	620214	2495918	411287	496927	1217452	502933
3-(4-Isopropylphenyl)propanal	MSMS	C9H19N3O3	218.15395:3028450 219.1573:823342 220.16066:722674	53.03941:1662 55.055:3558 56.05834:2460 56.96551:1577 57.07053:1251 59.92386:853 60.04556:877 60.36034:906 65.03946:3040 75.24531:1008 79.05474:3450 91.05459:3222 94.06559:1392 95.04962:1984 97.61234:1221 103.05457:3487 105.05772:1467 105.07072:1130 106.06578:5923 106.46227:1043 107.04947:6287 108.04542:1177 109.0527:1140 111.04425:1301 115.05441:2584 117.0577:2728 118.06507:5912 119.07281:1153 1…	4136973	9720187	17534494	5085158	3318297	4500502	3715822	9023293	1382059	1860342	1436905	1596360	1606934	3498327	4665410	6355212	2690810	1925372	1700644	1626136	1839540	2629957	1384199	1521716	6777748	2672295	1735699	2499926	1628928	2011547	6620132	1784317	10906671	2524406	2532123	8713898	1803092	3314589	2215979	3251220	1947525	5544758	2296155	1750001	3175129
3-Dehydroxycarnitine	MSMS	C7H15NO2	146.11748:51130932 147.12083:3855788 148.12419:262864	58.06598:102313 60.08158:51479 82.06566:8667 86.06149:4282 87.04472:63014 100.07615:14566 102.83671:4721 146.11772:16004	346078400	346248192	343251360	342453216	354292992	354808448	63272	353993920	801377	260832	1115720	2072988	2745909	2357889	289421280	290519712	286091776	416266784	1536689	1004188	1037501	1797636	1433357	360292608	363362048	364282016	333328288	332632160	332242144	373237984	374595424	374580704	244600640	243920864	245928224	347357888	348872384	347968224	2962594	413707552	411217952	360845440	367657696	362259808	410919648
3-Hydroxy-beta-ionone	in silico MSMS	C13H20O2	209.15356:5474491 210.15691:680593 211.16027:132978	55.01862:3507 55.055:11262 57.06791:4428 57.07075:73523 67.05502:5609 68.99787:34384 69.03429:3946 69.07049:12768 73.5405:3053 81.07062:4529 83.04993:4325 91.05465:7027 93.0703:3882 97.02872:4257 102.14664:3128 105.07064:3366 123.0451:3543 153.09058:7430 160.87939:3451 209.15358:37316	58897200	55322456	56954628	58917400	58190416	57911832	59922016	59444624	55475400	53229420	55827640	53044948	53381076	55334004	55433980	54039796	53810704	53316000	55349936	55143364	53092700	51873544	54203924	53320680	51846280	53589764	55377916	54108016	54858712	53524768	55480140	54077240	55270860	55014104	54775056	52683720	52057768	52264192	53001136	53211868	53395316	55563984	51944032	54275156	54425632
3-Hydroxyadipic acid 3,6-lactone	MSMS	C6H8O4	143.03957:1622631 144.04292:100347 145.04628:307339	55.05512:1446 55.21494:934 55.93532:1317 56.04387:1073 56.96297:1411 56.96568:20067 59.87893:986 60.95835:4050 60.98732:7051 63.06535:1018 67.51048:2985 67.93552:1453 76.51572:4365 78.9977:17548 92.17325:1002 97.00803:140927 99.01234:1198 120.02377:7233 138.53922:1164	7315018	8644035	10399799	6022120	3994925	11654475	7421644	7489480	5559810	3939638	6642178	2751639	5132398	7320818	6338880	3528123	10020528	3418532	2717009	4271415	6197356	4731947	1817124	4079075	5509434	2600566	5437676	4089587	6019799	4353026	3523261	9052602	1546689	9331163	2810967	16817258	1332823	14726211	3365544	2538093	6919928	2896322	8551072	6946273	4747537
3-Hydroxydodecanedioic acid	MSMS	C12H22O5	247.15411:6000933 248.15746:818403 249.16082:150584	55.01879:90620 55.60611:2798 57.03428:3406 59.04729:4077 59.05003:62710 61.55544:3011 73.02909:14510 113.06004:15463 142.491:3644 194.99741:3705 209.86526:4366 211.83681:3908 232.04279:3695 240.01286:3558	61644968	59129052	59742752	79540376	63627644	86330936	81394872	7186728	108019	122435	87607	910005	73875176	164813312	96451	83242	202295	45217100	49002052	3578662	7144348	94865944	152992768	142288128	140456784	195285392	67418	61441	58431	56156	46340	112712	36435	36279	41013	195423072	138109296	191726464	165464608	76649272	167651296	70406	59133	32417	10179289
3-Hydroxysebacic acid	MSMS	C10H18O5	217.1071:952654 218.11045:105196 219.11381:12161	53.03942:1115 55.01866:2001 55.0225:658 55.05513:33850 55.87822:624 56.05019:868 56.3815:551 57.16483:613 59.04993:3933 65.03935:794 67.05511:1255 69.03418:3834 83.0498:13766 87.04435:766 94.5387:937 99.04444:1624 101.06:1949 111.0442:4818 113.05993:1913 116.49332:806 119.87478:854 129.05487:1455 129.06998:867 155.07001:3769 173.08147:2228 199.08636:2809 217.10501:2013	19759170	1931805	1312458	8228424	4350347	37013484	9540328	33410632	3111907	6563603	39744236	35533384	38834560	9453995	2436858	39364768	3040661	36007724	3821546	34835380	3699888	16751961	17735858	40017228	38946444	1381047	2179573	40139976	36074564	4883498	9133388	18638502	5060592	35247744	1125465	9774960	2769252	5069843	7011014	1133391	704000	1966340	7952722	1694485	4718558
3-Hydroxytetradecanedioic acid	in silico MSMS	C14H26O5	239.16422:254961 240.16757:66243 241.17093:72817	52.20446:963 55.05501:2519 57.07058:1114 67.05491:3511 70.13116:1364 81.07042:2444 91.05463:2148 95.04942:1170 95.086:1346 95.18961:1258 105.07027:1662 146.07616:1250 182.86859:1323 239.08917:4913	832603	206065	1681604	1107662	371455	1685087	1725344	239020	313487	388526	211198	210108	486128	298251	243659	194119	290586	263981	385325	905087	250565	640505	203095	522159	508962	191459	213001	211286	358875	369843	219703	259971	810725	279105	224879	192962	192681	316356	573977	264939	679099	358764	373697	637485	354582
3-Indolepropionic acid	MSMS	C11H11NO2	188.07074:532510 189.07409:81600 190.07745:34128	50.41276:586 52.41738:627 53.00333:1015 53.03933:677 55.055:1130 55.78282:628 56.05838:893 58.94971:675 65.03953:1041 88.02229:1328 89.03937:1150 90.04685:1000 91.04925:978 91.05488:20232 94.7878:731 96.11195:755 102.17074:747 115.05453:15880 116.05004:1229 116.06235:1819 117.05769:7495 118.06529:11816 128.0504:768 130.0654:2912 132.41692:769 142.06525:2416 143.0731:5033 144.08096:8608 145.06554:…	4007034	3957680	3959785	4043296	3969489	4056181	3959546	3963729	3769998	3744681	91483	4151071	4123398	4253266	3494053	3282594	3334884	3548430	3478838	3554896	3927322	2444888	3982044	3390761	3317764	3348471	3198600	3210427	3318463	4002009	3789326	4022498	3666282	3735990	3769312	3069378	3123216	3226648	3626407	3636775	3557582	3702102	3821654	3725966	3598024
3-Methylcytosine	MSMS	C5H7N3O	126.05502:8496037 127.05837:2067016 128.06173:186060	53.03935:3035 54.03466:1916 56.05036:12695 56.96563:15445 59.01834:1613 68.05019:3076 71.95232:2274 72.93748:1934 81.0453:2188 84.04483:6984 84.96023:2257 86.77103:2012 88.09089:2237 96.04465:4033 109.04003:2054	73488912	74571616	76716112	76090728	76649888	77607472	77901312	77838208	75518520	75889512	75021384	99578656	101718576	99001624	822621	53122092	53024320	71868248	71033496	584205	78585000	78489712	78683256	74266344	75044824	76163768	76950984	78723744	77856520	81390392	82116440	81699856	72178800	71409464	73147856	71636944	72180176	71990624	58787324	58179184	57466760	58160872	59697596	59316720	61486820
3-Methylguanine	MSMS	C6H7N5O	166.07234:8356160 167.07569:852593 168.07905:846230	50.55523:2302 52.08968:1678 54.03471:2582 55.02993:11940 55.35695:2348 66.93915:2565 67.02685:2555 67.0298:30426 68.02492:9204 69.04206:2824 69.04544:42275 79.02968:14803 83.93031:4138 92.65656:2367 94.04034:9107 96.05575:4266 101.94099:2800 107.02422:7774 117.38839:2538 124.05032:12316 142.06116:3566 149.04585:5645 166.07224:28583	58189912	58533892	58543692	59234912	59657060	2433772	59728720	59957472	65079560	64088556	64242284	63271640	64734964	62643964	63706200	1651332	61155904	61993224	60656568	61933364	61431992	61243840	61497752	53658060	54181168	53953244	61819368	61449884	61518592	68820704	69596600	70360936	66284056	66277880	66158332	56618196	56037568	56304492	55147948	55796052	55690204	54619948	54933288	55197768	58744948
3-Methylindole	MSMS	C9H9N	130.06526:350954 131.06861:71162 132.07197:96081	51.02374:2597 51.6665:1039 52.01878:973 53.00307:4471 53.03939:1337 55.93532:9962 57.07081:1886 59.99102:1850 62.88812:1065 65.35679:1015 71.94099:2085 72.93788:32929 76.09156:1227 77.03943:1489 83.96745:1074 90.9482:10658 95.04961:3745 97.00806:5018 98.943:1210 99.94867:2045 103.05456:1537 108.95864:4300 110.41854:1155 113.96414:3761 117.95892:1813 130.06523:2490 130.15924:2317	4162170	2922465	4340519	3667498	2479916	3779479	3868858	2124084	2764943	1817889	811241	2673019	5321148	2510746	2770493	1669738	450857	3996417	948992	1044598	2232343	2212084	1604945	1933969	2313485	1690164	876449	1863208	473998	2477662	2981882	677397	4791362	3460672	2941332	2627388	2720252	4813966	1186171	1949987	3130238	482448	927171	1741510	554950
3-Methylphenylacetic acid	MSMS	C9H10O2	149.05956:925475 150.06291:70846 151.06627:260814	50.01593:2327 51.02374:14881 53.00295:3648 53.03707:1508 53.03943:21513 55.01859:1651 58.14469:868 58.89406:862 65.03603:1584 65.03931:24705 73.53326:818 74.37292:869 77.03915:9176 79.05486:1063 81.03408:2105 84.50719:929 88.81059:891 91.05469:2487 95.04951:31489 99.87732:1138 100.92316:845 105.03386:13917 105.04479:9758 121.02814:1038 125.25586:953 130.26848:955 149.02243:1412 149.05969:3301	11493177	10906757	11090072	11494292	11711432	11463170	11250666	11057178	13336636	10474570	6294610	11756632	6414439	12078323	10317902	12094587	11206539	6462780	5325360	10424645	5059645	5026672	9748508	11006023	9749918	11696524	10902940	11528748	10308698	6082130	10370919	10734137	10639599	9033066	4680187	11275032	7583785	10320745	10685056	7011256	10699683	10841740	10851737	11258955	10408335
3-Oxoadipic acid	MSMS	C6H8O5	159.04018:1035653 160.04353:31127 161.04689:38224	52.13229:1863 53.40137:1658 55.93533:127585 56.05031:2656 56.83449:1363 56.94321:10713 57.05366:2477 57.05795:2162 58.06596:7890 59.06927:4027 61.13542:1643 63.94322:2685 71.92632:2802 71.93011:42990 72.04512:10087 72.93794:159295 76.93357:2373 80.9457:6499 85.39208:1605 89.94043:3273 90.52267:2008 90.94828:43178 97.00791:2461 99.10027:3298 107.95071:3119 108.95896:9345 113.96394:2229 115.05486:2…	8295160	8467514	8382920	8812847	8230753	8310546	8273083	8404538	3062508	6176978	5896445	5365938	10057994	9675362	5340798	5670456	5464592	8789986	9346080	9263475	7808502	8019867	7696398	7363833	7360322	3872615	7308244	7277895	7348186	7795687	8007812	8063034	5068858	2400587	5136355	7315628	7066657	7192699	7441990	4347794	7639850	7221644	7360836	6990636	4800111
3-Sulfinylpyruvic acid	MSMS	C3H4O5S	152.99486:812333 153.99821:256205 155.00157:11408805	53.0029:1053 53.03948:2052 53.93771:967 53.93997:10888 55.05496:1835 55.93534:4977 57.9356:1638 59.93111:7691 65.03931:3515 70.34115:705 70.94254:58095 70.95818:837 79.05484:1347 88.95293:35374 91.05473:2351 95.04941:1962 106.96333:12733 107.00168:905 111.96857:1569 114.40102:613 117.95995:2083 118.96764:6457 129.97884:2295 135.97052:966	2760936	2909689	6328276	346795	3044202	3922710	3889300	3920493	2590784	519233	372233	381070	1911004	361423	513940	1071914	740110	6503424	2032639	1684437	546160	3142379	1176156	1167332	2098291	1336683	234839	2196303	2157448	1587747	2353506	4389682	2458722	232016	379023	1229522	210708	395842	575911	1013905	3173294	507015	947563	1333752	3663761
3-Sulfopyruvic acid	MSMS	C3H4O6S	168.97742:74247 169.98077:222446 170.98413:0	53.03951:3388 53.99826:2276 54.04266:1713 55.03:41549 57.27398:1050 61.66846:1149 65.03941:1920 67.05499:4071 68.02486:2456 68.05836:4791 69.00601:1555 69.00918:16383 69.99306:3411 70.04077:21827 71.02488:1443 74.79534:1389 80.02481:2017 81.07042:1230 94.21867:1401 95.04935:1113 95.06874:3165 96.01969:15672 98.03526:5395 107.02697:1214 109.37388:1464 117.96677:2224 126.02997:11669 141.04088:5938 …	243277	32445	37273	267408	304674	158923	53923	213892	587015	89261	13438	44981	11608	255529	22271	28039	17869	296611	16736	401362	208570	42358	129744	224102	24832	121968	236900	208423	22674	259122	10546	34708	35203	10287	34082	222428	16568	42769	102989	130257	180769	26474	144965	22323	28823
3,3-Dimethylglutaric acid	MSMS	C7H12O4	159.06508:698047 160.06843:25290 161.07179:621959	55.93528:30114 56.01377:741 56.94304:1984 57.03444:1079 58.91325:637 59.9311:14216 67.55722:654 70.02953:1863 71.93006:9161 72.04513:11871 72.9337:1373 72.93787:28177 76.93372:10947 80.19839:734 90.94292:1299 90.9482:14281 91.05476:2730 94.9441:4649 96.70348:787 104.95885:801 108.95853:3233 112.95451:1023 115.05442:1368 125.96136:1830 128.0619:1164 159.09979:866	7814825	8049218	7681720	7161165	8594658	8755617	8363191	8250947	138381	123070	86253	18862360	19430860	19653700	64341	109747	56793	12758311	12808530	5873794	15691812	15763279	15366096	15371464	14753964	15231928	93128	136499	55735	120289	106287	75394	89169	95572	116658	21093602	20644272	20434058	17733552	17581750	17571588	80497	88558	76766	55624
3,4,5-Trimethoxycinnamic acid	MSMS	C12H14O5	239.08922:1159419 240.09257:103238 241.09593:15332	50.63109:622 54.24537:635 55.01867:2894 55.05509:3048 56.09647:677 57.07082:8523 62.03049:630 64.99368:753 67.05501:3599 69.07063:1090 79.05502:1220 81.07039:873 83.04974:1384 83.08617:742 91.05473:2356 95.04964:4583 95.08614:1604 105.07007:1343 111.04487:753 137.06007:3338 141.73813:745 153.33142:854 193.12231:2214 221.11766:3352 235.87669:791 239.08878:3192	3323233	5438956	2561827	3083612	6918814	3428556	5632142	8936950	3141411	1814707	9651028	4125174	4793458	1675699	3973066	2386136	3253742	2345536	1682155	3881324	2909178	3890394	3428501	4176444	5645156	3705240	3320762	7291253	4126924	3755704	1778822	2653654	2410974	2132242	2746778	1881991	4222024	3111183	1955738	3136044	3826966	5963196	4791352	2584764	4104882
3b-Hydroxy-5-cholenoic acid	MSMS	C24H38O3	373.27417:1563394 374.27752:412486 375.28088:66036	52.67245:731 52.88557:757 55.05515:5517 55.86255:865 67.05506:1682 69.07059:993 79.05485:2771 81.07053:4423 83.04996:1126 83.08635:1778 85.06557:1641 91.05466:2511 93.07041:4532 95.08576:4635 100.94126:879 101.05961:1371 105.07052:5646 107.08611:4490 107.30776:836 108.70895:1067 109.06553:1116 109.10159:2881 110.6885:1036 112.103:964 117.07011:1408 119.08613:5820 121.10154:1937 129.07065:1084 131…	12041533	12065951	12430217	12476498	11993925	12021637	12105671	12162871	13194532	13434195	13227194	10209214	10298780	10390365	11539206	11579821	11761139	7251041	7332111	7344675	11439121	11379621	11360698	10537303	10809316	10628041	13234348	13639471	13531583	15646133	15770233	15770321	16932534	17033636	16769970	17443600	17567428	17560150	11134332	11093108	10906270	11247125	11586705	11500334	9309844
4-Aminobiphenyl	MSMS	C12H11N	170.09641:1550828 171.09976:332596 172.10312:0	51.02385:1054 53.00301:1680 53.03939:2541 55.01863:4066 55.05514:17952 55.9353:46643 57.07075:1340 65.03944:17673 65.92643:794 66.04728:15021 67.05511:1623 69.93479:1996 71.92997:3169 79.05491:5251 81.0706:1047 91.055:1506 92.05004:11325 93.05786:83451 95.04954:3214 97.10135:1172 128.06215:1157 128.95107:1731 143.0714:925 146.96115:2967 152.06172:2605 167.07155:937 170.0965:7276	17669714	6208306	9386666	8182715	8585033	4448615	12139175	12072277	1702930	1183974	2644608	4088214	3387003	945751	1506752	1975012	3480948	2142287	2465521	4124858	2460940	1944443	2780256	2969432	17075800	3088938	14301083	2985662	6665827	2910401	9605502	3219938	3063695	3123851	7050428	10962780	15729959	17494666	17210032	16543725	18373544	2713134	10811457	5806772	10238715
4-Guanidinobutanoic acid	MSMS	C5H11N3O2	144.10185:880503 145.1052:113010 146.10856:125690	55.05509:1609 55.9353:791 56.05009:715 56.963:1019 56.96563:13157 57.9356:2223 58.06598:10636 70.06592:819 71.95269:3104 72.93761:671 84.08136:12873 84.96023:2583 85.02905:921 98.09641:1104 107.57884:700 120.98077:1113 136.59294:715	7206948	8652451	6863390	7302532	7532280	7235482	227053	7301251	4039134	287827	256530	448768	133578	329743	251285	373670	132413	165688	245203	350515	2319714	198853	8019990	264840	5948390	8516012	4852282	4824224	205923	7273041	6823480	7373548	7209378	6517522	6446864	166094	230585	226643	318470	196160	7988502	6060702	2265106	5926188	5453190
4-Hydroxy-3-methoxy-2,10-bisaboladien-9-one	in silico MSMS	C16H26O3	267.19568:683610 268.19903:127264 269.20239:110853	55.01875:4402 55.05511:5022 57.07077:9859 58.05079:701 67.05489:2860 69.07062:2432 71.08632:796 73.02919:4843 73.4511:754 79.05499:2248 81.07056:3311 83.08637:1105 88.06422:744 91.05466:4222 93.07031:1966 95.04976:1489 95.08604:2297 98.98444:2071 101.02361:1746 105.0639:819 105.06999:4543 109.06539:1187 109.10109:991 117.06989:1158 119.0859:7778 121.0659:907 123.11649:1394 133.10136:3406 147.4851…	801117	150059	599018	8312300	239623	1650886	186403	4545596	7082990	7135580	6387240	7307924	6201504	1223716	7145464	6578020	7259004	6900592	7114448	2934942	6963557	7425982	81313	135947	138297	1251899	3986275	244935	220539	225923	205209	151887	128001	350928	229601	2315542	154101	375138	124614	354983	146285	7210719	240266	517906	143647
4-Hydroxy-L-glutamic acid	MSMS	C5H9NO5	164.06686:1987874 165.07021:273119 166.07357:367313	52.60158:1191 56.96561:1893 58.93341:3398 58.99868:70309 59.93111:19803 59.94126:4081 60.93878:4155 67.35213:1290 72.93805:1795 75.93635:1434 77.00905:34998 77.94142:3843 82.0145:6581 95.01958:10227 100.02481:71461 104.68259:1382 107.75423:1397 117.96632:2052 118.03517:77351 118.96763:4581 123.04033:4988	15094002	15387033	15230861	15471485	15065421	15172045	16815292	17710104	8657890	8614969	3620351	30431308	29273300	23878334	10148077	13575836	13451650	22332358	20990904	22495044	18306544	17205836	17214540	13801631	13321105	13763139	10489784	9743469	10093433	20298280	12758893	19035068	6223110	5651210	5241307	12202926	13118338	11477311	15279288	17244202	16935816	11253862	10822175	11400478	18922792
4-Hydroxybenzaldehyde	MSMS	C7H6O2	123.04063:22313736 124.04398:4150034 125.04734:3730938	54.34747:13547 56.96573:120364 58.99875:106548 77.00903:25325 89.06802:16525 100.0247:24498 105.40018:19638 118.035:29540 123.08917:15720	181367648	181361680	181261936	180649328	181813488	179255536	196598032	205860288	81781544	82120296	77127776	331864576	333203616	294157248	99247408	132614344	130030456	255891056	243945392	251950160	209722912	197803648	202359824	159618224	153832800	158599584	108094464	98828408	102871624	230132320	217665968	211233984	69733056	63627560	58471468	148250160	155480832	139129872	187979504	207656880	207708000	121854040	112727296	119738712	224761216
4-Hydroxystachydrine	MSMS	C7H13NO3	158.09659:593786 159.09994:223028 160.1033:38469	53.3718:533 57.93548:811 58.06592:2726 58.9335:1310 60.32328:646 63.23189:557 64.48571:714 65.01054:695 65.03925:1358 68.17533:592 70.94269:1015 71.02377:762 72.71117:759 75.9359:1319 78.99773:1499 89.03911:1819 90.0467:1145 91.05484:8958 93.94623:932 97.0081:21850 102.04688:694 111.95683:1326 115.05448:15459 116.06238:2855 116.52016:709 117.05775:3362 120.02395:983 125.00288:1130 128.0495:1708 1…	5753774	4589286	4673704	5945222	4991536	4639095	5221857	3868461	2931768	1241675	1799450	645125	859455	1532252	585768	1579449	3311632	2136468	3304739	3703596	3544747	739627	2465348	672146	1448673	2275813	735675	1808577	1742816	1290194	492409	1756411	500365	568640	787501	6997706	8732367	6486348	639587	565879	843336	809760	2033608	868631	307825
4-Pyridoxic acid	MSMS	C8H9NO4	184.06047:5874504 185.06382:488039 186.06718:325545	51.02368:13845 53.00299:12941 53.03936:15532 54.03457:4179 55.05494:10074 56.24391:4040 61.6271:3738 63.02365:19258 65.03938:241260 67.01855:5069 67.0425:24051 67.05489:17545 74.15849:3898 75.02368:7807 77.03924:10000 78.87376:4126 79.01844:15016 80.05009:14945 82.06578:12685 85.16199:4570 87.87191:4267 92.04985:52068 95.0495:9714 96.04478:17102 108.04471:6074 110.06047:23652 116.96228:5092 120.0…	22575104	23023336	23619948	23993290	23888412	23735442	23825586	24265658	27507886	26972730	27582180	21353026	21715924	23347336	18918032	18787604	18636576	22344580	22260422	22421182	25833758	25917848	25682478	24007910	23581212	23779796	24074668	23813066	23918226	27284726	27191506	26910894	22399124	22508404	22266334	23234922	23070960	23643672	24531042	23838338	24372258	24081696	24221886	24084748	15812643
4,5-Dihydrovomifoliol	MSMS	C11H20N2O3	227.16428:4827876 228.16763:631597 229.17099:101848	51.83887:1910 55.0186:5535 55.05513:13563 57.07077:92760 66.68901:2533 68.99783:34254 69.03434:5890 69.07068:13192 75.45558:2238 79.05494:6348 81.07085:5274 83.04992:5212 91.0546:6130 95.08601:2953 97.02894:5232 105.07052:2524 107.08599:7884 111.04401:4622 111.08069:2441 125.09648:3434 135.08061:2767 135.94235:2827 139.07513:2372 153.09105:8298 191.40839:2541 193.5123:3027 209.1535:64248	47518380	47315592	46870396	47420116	47642596	47575728	48465436	48555776	45460976	46039972	44721640	44683040	44688752	45341512	46215236	46553764	46398892	45762000	44871632	45099312	43917920	43657492	44312528	43152484	43618008	43857040	45587668	44434184	45175044	44119476	46178220	44438420	46625884	47733348	46025652	45168328	44408720	44296100	43625508	44088364	43978764	46384580	46201060	45732664	44677980
4'-Hydroxy-2'-methoxychalcone	MSMS	C10H16N2O5S	277.08353:68688 278.08688:0 279.09024:0	53.00294:912 55.05496:1424 55.10484:800 56.96554:896 57.07069:40642 59.44466:691 62.74417:688 65.13996:717 74.94252:837 78.53886:733 91.0548:1355 95.04964:1249 104.97781:786 105.0704:1326 119.08563:998 123.04388:1694 131.08537:1826 147.04332:1017 161.09439:966 179.10625:3764 187.86934:901 217.15935:1219 219.13673:1372 235.16896:12858 258.9577:933 277.17926:7608	3921	336977	17711	10795	6640	12609	4822	590901	2771	2921	218011	3437	15144	136777	124508	294554	7458	21869	286092	5073	17247	377416	9976	17196	3899	9012	329113	8588	4458	344867	43410	4759	5378	7683	3338	171869	3465	382886	12334	4836	309385	8100	2781	525806	429961
5-(2-Hydroxyethyl)-4-methylthiazole	MSMS	C6H9NO3	144.04779:774754 145.05114:44534 146.0545:0	56.96569:206549 57.93567:13745 58.06614:1743 58.94356:3377 61.92867:4905 63.83158:1195 64.71737:1315 67.93556:1609 71.95266:48687 74.97614:1371 75.94617:2558 84.96037:41577 87.42649:1099 89.96319:2101 92.54268:1167 93.9563:1500 97.00845:4316 97.90123:1172 98.22267:1151 99.25557:1172 102.97074:9768 120.98104:6372	8343556	8167423	8040288	3605082	8338176	8563472	8183516	8656319	8022475	7995568	8038265	6746390	10440754	8173167	6845604	6591786	6490459	9326368	3529134	3071382	8408847	8845724	4106261	7480149	7703668	5080828	8708894	5617638	8714813	10042441	9954343	8100753	4741452	4230215	7885054	7589372	4667145	7427744	6843338	7072677	6874785	8195565	3558941	4132162	8195364
5-Aminopentanamide	MSMS	C5H12N2O	115.0949:1667222 116.09825:186674 117.10161:104552	53.00311:2907 54.96077:1878 55.01865:2975 55.05496:2244 55.93516:8534 56.05856:3747 59.5217:2286 68.52701:2038 71.82709:2120 94.541:2214 115.09531:5502	20267732	30336190	27492348	32806848	29128432	28781450	4912380	25639584	9737023	7260918	1761470	420233	150602	284557	11846630	3415614	18592958	361939	492996	235258	321250	370946	289470	477305	280292	459160	22025452	27615824	4061352	28080360	23372134	22631510	6276118	10786969	9410065	454640	338644	302094	253198	630432	368181	9129078	24282060	18655546	549356
5-Hydroxyisourate	MSMS	C8H8O5	185.03073:1190336 186.03408:100372 187.03744:143853	53.94001:928 53.9984:2231 56.96565:968 57.93568:2358 66.10792:784 67.61819:832 69.00912:3035 69.99319:10700 70.94244:948 71.0247:2810 72.93778:1226 83.29795:836 109.7521:949 116.97202:1337 142.02547:1469 148.52434:1021	6414074	6537330	7165248	7582918	7009793	7274116	7449838	7622375	1599365	2287774	1192957	6484172	6385750	7146511	4406546	4744834	4758035	7400014	7283950	7665706	6145300	6027764	6112506	5901528	5902106	5970147	3892699	2542408	6713524	7028860	7118104	7053694	5410001	5391196	5409934	7660494	7624506	7414249	6504378	6381815	6496105	6392149	6422278	6484471	8059448
5-Hydroxypyrazinamide	MSMS	C5H5N3O2	138.05504:76881216 139.05839:6251978 140.06175:830582	67.04259:61212 68.05017:62430 69.03409:57619 78.03491:42716 78.95493:48875 89.54734:49441 95.0962:54373 96.04512:290082 99.46983:54114	1414272	2973480	587428800	1614737	5577106	1504115	1776727	595435584	666519	433037	603589	455310	690868	2237263	337282	427992	227070	598391	544612	1311793	2736320	481466	2847364	664438	663682	2422653	651344	1918033	540651	963836	1638720	3200804	384248	1112038	621054	417875	439170	2374690	1443275	2415328	5282570	313213	244214	2646644	6280426
5-Methoxytryptophan	MSMS	C7H10N4O3	199.08679:112857 200.09014:14760 201.0935:37697	51.93201:764 53.03951:1218 55.05516:27767 57.47139:839 63.43789:798 72.04522:8170 74.09316:1198 74.09723:19741 83.08615:2769 85.36435:837 95.03704:920 95.51689:968 95.70879:957 97.00823:9799 100.07607:3291 109.60847:874 109.69344:904 125.0026:1641 144.90642:902 154.06541:1051 164.64206:1032 199.18022:2038	885340	160492	57968	846454	39265	128588	50301	782249	94068	77663	85753	1971613	1918117	1830905	1734160	1578507	1993177	1420106	1440757	938001	53109	75364	91318	53561	82942	80254	2769943	2439509	3011870	49144	53027	77696	1498797	49488	444455	72773	127226	42777	80516	73317	55692	1478029	1546790	85549	1527078
5,8-Dimethoxychalepensin	MSMS	C10H16N4O7S	337.10452:1949308 338.10787:398532 339.11123:35719	52.69707:732 54.14139:789 61.08495:934 67.05491:1931 69.07053:1434 79.54166:765 81.07031:2313 84.73398:927 95.08566:1557 142.0351:923 291.21432:1011 311.9043:960 337.10291:12011	21163224	22515902	23313640	23574442	22315048	22383608	21685492	23062964	21328184	18693554	18860940	11554631	18740758	18693206	19165750	19068576	20925766	19500338	20227794	20683112	382947	9711200	10245593	20116980	19729552	39583	11751105	20367700	19964168	20536592	848525	20781688	20843044	21805794	21316142	21014030	20421754	19264434	17985768	20106754	641429	11989695	20576890	20691494	20691220
5'-Hydroxycotinine	MSMS	C10H12N2O2	193.09726:288250 194.10061:1333124 195.10397:4272152	50.96859:4131 55.01881:26231 58.69717:4091 60.87383:5491 68.99786:623915 69.7233:5100 85.70903:5457 87.00832:26188 103.49861:5371 105.35744:5218 111.00809:30683 125.04145:5577 129.01839:24987 139.00247:16182 164.99435:5700 166.36128:5812	29959	41907	21691	1706714	12751	16586	1537004	34483	2414941	2406512	102149	161236	155018	85094	129238	2207308	92165	123878	133328	552621	85193	35780	20535	21631	32220	18822	10642	29435	2343360	27399	29449	23592	44147	15864	13031	10397	1882621	1752362	2432024	12627	8573	12339	28402	2811807	11356
5a-Androstan-3b-ol	MSMS	C19H32O	277.25275:54675 278.2561:18820 279.25946:121311	53.00317:966 55.0551:1049 57.07074:40055 57.46767:778 57.86622:637 58.14357:609 61.77513:939 67.05512:1004 91.05467:2016 93.07065:997 95.04949:1029 95.08575:1247 105.07021:1524 107.04906:1181 117.07008:836 119.08522:907 123.04453:1218 131.08508:1498 179.10649:6489 184.99014:834 199.68434:924 219.13843:1176 235.16896:14132 277.17947:9987	113606	318862	76179	84638	70164	62585	88148	353650	149917	104595	84184	59284	71082	73864	204060	137284	114431	464718	218873	135699	152441	78254	28000	94678	106820	130481	69883	48918	56277	317792	105986	206672	362434	357817	272018	87675	41060	49733	77554	78054	177888	114172	297841	73689	108509
6-Acetyl-2,2-dimethyl-2H-1-benzopyran	MSMS	C8H16N2O4	203.10683:885694 204.11018:205471 205.11354:106804	53.03946:1972 54.10056:597 54.56591:602 55.01864:2477 55.05506:1998 55.94627:635 61.29838:645 68.54013:658 68.99792:785 70.94244:842 79.0549:4672 81.66456:754 89.98148:779 91.05484:11790 93.07022:2033 95.04971:2832 103.05482:3335 105.07041:13890 106.10969:800 107.04929:1248 115.0546:4876 116.06306:803 117.06992:6219 118.07834:1438 119.0859:1330 120.62957:728 121.06508:2590 128.06229:4881 129.0694…	7546856	4474536	7998522	4127180	1036111	1518792	12792250	2821849	4125166	2123904	1464215	8452351	11194975	5867780	4838691	4240845	4798516	3189479	12372509	6063348	2699004	6197710	8072479	2603224	3827650	14316060	577625	1740049	707109	1179046	740356	767213	5549070	505184	850257	3836598	16994866	1887977	3221874	1867753	1102855	522849	3919920	802449	3065944
6-Dimethylaminopurine	MSMS	C7H9N5	162.07616:1077046 163.07951:138755 164.08287:0	51.62055:36234 52.57904:42819 55.44874:40601 57.0344:73983 58.06604:445844 58.64007:39707 59.0737:101025 60.08156:218122 66.27634:42777 76.64687:42150 77.02158:45737 85.02897:104683 102.09177:82036 103.03945:74116 142.47911:54931 162.11258:107714	8069198	9082158	7618377	7708442	8124290	3717084	7047619	7371836	1891119	4937178	1835568	4676988	6261673	10886250	4688996	2690778	2043305	7832960	8677450	7907433	7356231	3396447	7686796	4632573	3039161	4870537	2373891	3144826	3086974	8908830	4615039	8803976	2919110	1271778	2887886	4172532	3690707	3642776	7193638	3546798	7463772	3265678	7345856	3474950	8320169
6b-Hydroxy-8a-methoxy-7(11)-eremophilen-12,8-olide	MSMS	C14H20N2O4	281.17438:167047 282.17773:19057 283.18109:37494	53.00292:1255 55.0551:11759 57.07077:9111 67.05506:10253 69.07069:6959 70.68562:711 70.7143:797 71.08614:2502 73.85965:867 78.94108:755 79.05476:4958 79.18484:1029 81.07056:9760 83.08611:2489 85.02895:1240 91.0547:2174 93.07033:3095 95.08597:6947 105.07013:1921 107.08591:1354 109.10151:2349 119.08534:893 123.0807:1213 130.40268:887 189.87111:990 265.54996:914	1216919	848496	827835	1196465	276159	1751230	1631370	561274	491501	146489	526907	139865	527254	314063	261537	38139	506100	132941	193756	457491	232316	334548	321882	1772391	350652	199970	181825	140231	165538	145480	211828	352240	818377	813665	1201612	635806	385939	328831	256130	1694294	146634	1420676	999469	914158	987417
7-Hydroxyaustrobailignan 5	MSMS	C18H20N2O5	343.15405:615869 344.1574:109293 345.16076:50051	53.03955:2290 57.07077:1147 82.61862:1069 87.48444:1006 93.03671:1190 95.04955:3322 95.08591:1184 105.03384:69582 110.36363:861 163.07523:9971	6227524	4584870	3526882	5042161	6607623	7115770	2375429	3783159	1439018	6059744	1432636	6858785	3275180	1391667	1585840	617490	1078813	1613415	951597	2491016	776358	4555328	1572924	3885843	1355990	1695857	4555638	3881816	1459869	3915081	4516006	4557882	4292541	4636342	1787999	1343625	3486800	3973735	949888	3797708	1320950	1678740	1201256	1224801	1470748
8-Hydroxy-deoxyguanosine	MSMS	C10H19NO2S2	248.0766:120707 249.07995:0 250.08331:117018	52.98682:5609 54.36837:4918 57.03441:40603 59.07365:7291 60.08163:36718 63.99566:5949 64.35381:5548 77.92801:6512 84.08133:17474 85.02898:556745 85.50147:5850 103.03918:17554 125.34865:6233 153.79558:6329 160.73822:6091 248.14935:37102	411679	412857	236134	362962	346701	276283	287847	300765	134240	29397	61486	464811	470939	371624	32499	74579	16076	195282	305041	156735	274476	203430	324407	270856	261662	209979	179869	159863	131748	199484	352091	283784	71694	40040	28788	200657	196107	204399	447541	419010	428548	315089	290391	379485	439197
8-Hydroxyguanine	MSMS	C5H5N5O2	168.05176:1382494 169.05511:1825625 170.05847:149508	53.00314:739 53.03936:2420 53.93993:1680 54.19738:601 55.03002:8666 56.96558:965 63.92955:1619 63.94323:6612 67.05496:1176 67.93569:1575 68.02511:5077 68.05031:1282 69.00916:11270 69.03442:1243 70.04081:9969 72.93815:894 80.0502:1081 80.94579:8276 82.0406:862 83.02486:844 90.94817:865 96.04501:8775 97.05151:743 98.03516:1066 98.95608:2728 104.35726:721 112.06222:5096 116.96649:38068 123.03043:234…	7082262	140020	5575808	7511655	7391489	5853732	7426378	5846324	68298	147954	130397	250152	281192	116333	103353	100389	139374	108664	216516	321701	214088	163423	287662	122606	142431	6163924	7229049	114927	7261421	7872054	162386	7647100	4554745	4617984	3405219	8430616	8445294	8456734	176752	6176127	6578828	5865977	5818610	5786118	10917183
8,8-Diethoxy-2,6-dimethyl-2-octanol	MSMS	C16H30O3	269.20859:2058303 270.21194:360798 271.2153:479150	52.65737:1355 55.05501:2755 55.4982:915 56.96335:972 57.07065:2367 57.15374:943 67.05502:2087 69.07071:2525 71.08631:1502 73.6062:1004 79.0548:2500 81.07046:2013 91.05477:1750 139.69044:1165 184.45361:1246 188.12079:1186 205.90962:1252 228.23076:1767 236.58199:1338 269.20883:8591	25922362	12965347	30898900	15011018	25506760	26798792	29132732	17118144	9064400	5612716	8697872	12890503	18293046	12590465	1236228	10299645	4338762	11256343	21822372	1467576	710902	21773386	9697992	3638484	22074562	11405563	11412433	10091237	3236812	13748394	12485360	22805730	12887538	24984840	25361480	24143918	16200714	9611803	12371106	12376768	4559149	3324159	23810826	25325598	25041884
9,10-Epoxyoctadecenoic acid	MSMS	C18H32O3	297.24243:585558 298.24578:105575 299.24914:215705	53.0395:823 55.01879:1716 55.05515:8824 57.03446:1021 57.07072:3647 59.98071:846 67.05507:8194 69.07087:4223 71.08635:1278 79.05499:4659 79.97351:794 80.7978:892 81.07061:7250 83.04947:1271 83.08624:1653 88.07613:1310 91.05444:923 93.07043:2830 95.04955:1242 95.08604:4458 97.06494:1095 97.10168:1181 107.08591:1139 256.26282:1747 265.71655:1107 266.25836:894 297.20456:1125 297.24173:2643	161023	154534	123189	41198	115468	4374866	110436	53509	187672	2372836	55630	62334	118047	60833	119228	107939	45246	74702	95907	76504	46051	120702	79945	2882254	15679097	76856	49574	135720	125797	57858	57506	71606	32902	68966	146761	69913	3054834	80844	91148	60845	119555	52646	28814	78133	83656
Adenosine	MSMS	C10H13N5O4	268.10373:1472155 269.10708:265012 270.11044:22046	50.19018:792 55.01858:2525 57.03415:2728 63.92618:933 69.03418:1579 73.0286:1196 77.66382:1017 94.04006:3359 109.05087:1957 114.44041:1009 119.03532:9109 136.06165:166733 137.04556:10183 139.85696:1049 155.41028:1089 161.30008:1107 268.10437:3576	5237272	5253334	5461936	5479111	5465916	5484211	5566996	5523224	2123570	2115360	2088110	2620680	2746539	2549531	4460537	4385216	4291762	4719776	4708514	4663507	2464458	2487965	2390335	2266328	2257933	2276494	2712423	2767624	2792163	3992964	3891512	3913198	2626361	2610080	2626689	2814080	2810961	2828435	2884066	2836068	2857980	2970133	2978099	3059835	5312740
Alanylalanine	MSMS	C6H12N2O3	161.09619:1850557 162.09954:253782 163.1029:471304	51.02379:1685 51.31657:630 53.00302:1247 53.03947:3810 55.01869:902 57.80581:534 59.99118:895 63.02386:923 63.49569:643 65.03943:24298 71.04999:795 73.10257:738 75.57183:717 79.05489:3885 90.04671:775 91.05482:29495 95.04966:6700 102.04688:711 103.0546:5690 105.04543:1161 105.07041:3554 115.05453:3155 116.06194:1071 117.06998:3479 119.04937:2032 121.06448:1154 128.06259:3650 131.04907:3968 133.10…	24064546	14062066	26882404	5898857	25760100	21778490	26315592	24404796	3810663	1181384	2046262	10822513	16161573	15966533	1136792	4762891	3182564	1312422	3945421	2876254	7244756	580919	3253587	1171042	20653720	17774726	23210402	23006042	21694150	22208440	24453222	21879236	21945150	5422852	20349592	25721158	21564034	20157552	1787652	22356106	21292706	21223474	23046786	23217376	21480414
Alanyllysine	MSMS	C9H19N3O3	218.1541:1475902 219.15745:432044 220.16081:186530	53.03956:1257 55.0186:1250 55.05503:4242 56.05816:1761 57.07066:6274 60.74741:1042 62.86843:1288 62.87146:1174 65.0394:2396 65.89537:1216 70.06587:9386 77.74533:1232 79.05502:4212 83.86555:1404 88.07616:4756 91.05498:2017 92.80853:1280 93.58242:1401 95.0499:1770 103.05425:2604 104.5013:1321 105.05747:1496 106.06549:5371 107.0495:4351 115.05412:1896 117.05754:2926 118.06537:3166 119.07314:1382 120…	2869979	5407744	2770024	13201084	5139678	6664708	14516465	7736164	3789350	4237829	1953897	5232258	2801757	1137626	1090327	4677042	5461835	7044564	934915	5165836	4025260	1705634	3406883	2717674	2792436	3316548	3523120	3396036	12010338	2987710	6580430	2148548	960412	8844450	3026332	3298748	4452358	2802131	3295442	1394273	3288468	2671248	3079041	4440188	1891707
Allantoic acid	MSMS	C4H8N4O4	177.05473:1602346 178.05808:277258 179.06144:261142	52.08254:627 53.00313:5267 53.03944:1804 55.01867:1202 55.05513:878 59.04994:1537 59.9308:654 65.03941:117998 79.05501:1518 80.05024:1323 83.04964:734 91.0548:5454 93.03411:3384 93.07035:1472 95.04984:1096 98.98458:13520 105.06993:1099 111.04421:5950 115.05458:1228 117.07069:1237 119.23255:830 120.36211:824 121.02855:9787 121.03928:4916 149.0233:24461	19745934	19161170	19699684	20553906	20513662	19887926	20922696	20795574	13704858	12862975	6388036	25729156	25712498	27283754	14912790	14308143	13772656	20542900	19890814	19410236	23692242	22596958	22979954	24182268	24834942	24363660	7862988	8313788	15146880	14206237	13835159	14081047	8063676	7389323	13824569	27435874	27584574	27866220	24490076	24539808	24334040	13539914	14269112	8834021	22812188
Allantoin	MSMS	C4H6N4O3	159.05121:7905560 160.05456:693431 161.05792:124748	51.41552:2294 52.31083:1790 52.52826:2086 55.93303:1937 55.93537:17751 61.04047:16542 71.24915:2572 71.92992:7045 72.04514:11807 72.93793:22364 73.0404:3231 90.94823:7018 99.01936:3499 124.07705:2367 133.03323:2240	58066340	59366540	58296436	60460240	56690704	57597360	57051660	57544980	62582584	62489780	62621956	54724300	54333100	53206452	58822864	59311716	59011772	74809776	74022392	76515168	70488360	69979080	70183392	61505720	60751400	61832180	56391968	56448916	56251076	64147648	64291944	64457240	70127688	69795640	68351448	63810080	65204716	63452016	71480536	71632432	70916064	65207372	65555636	66247684	62585620
Allyl isothiocyanate	MSMS	C4H5NS	100.02475:3897415 101.0281:459398 102.03146:21788748	55.05514:5358 56.96286:4239 56.96565:66003 57.93564:176493 58.02966:3290 58.93348:390622 58.9617:10863 58.99864:41511 59.93105:49146 67.23435:2315 74.93831:8434 75.93608:152849 76.51569:2942 76.94383:3951 76.99567:4365 77.009:22505 86.00128:3518 92.94865:2911 93.94641:48167 94.93948:2916 95.01982:3882 100.02499:10356	41689668	38511040	38267628	32618118	35149488	34220028	39485764	42892684	49397812	53104156	40755112	48242964	50299256	49043320	38698168	51326908	50257204	46935612	41653048	44974720	46724572	37982812	25650214	50815964	38493116	24772942	55440200	37238256	47090920	35235060	41511152	39096976	45781748	37018872	32873992	18679072	47958972	29454080	38098496	26113616	54503672	41503792	34203960	29977440	330527
Alpha-Aspartyl-lysine	MSMS	C10H19N3O5	262.12848:3606133 263.13183:449797 264.13519:51880	55.01864:7330 55.44556:1644 57.03437:14598 58.06598:2997 59.0739:1337 59.99102:1806 60.07907:1970 60.08166:19515 73.02908:10419 79.53892:1524 80.45839:1535 84.08138:8410 85.02901:141406 101.02378:6999 103.0396:4584 144.10138:3877 192.42235:1633 232.0974:4515 246.11259:16350 262.12775:9184 262.14645:4979	25885078	22929738	23526132	23761576	22597404	23574328	22273962	23149772	19683704	17830994	18359308	28621906	29255840	29110252	10094577	9551438	10171335	27474056	27140452	27007910	19808976	20230724	19861144	21777646	22948064	21875220	24756366	24390766	24550926	25345766	24768814	24821512	16779266	18187974	19357840	22956086	23123810	23132862	29182586	30369740	29712404	28182314	26414290	25828576	26170480
alpha-Butyl-omega-hydroxypoly(oxyethylene) poly(oxypropylene)	in silico MSMS	C13H28O4	249.2059:4047565 250.20925:571905 251.21261:232755	57.07067:18744 59.04996:99226 59.88955:2063 62.44032:2122 64.85581:2009 67.05505:2052 76.32768:2126 81.76861:2203 84.30708:2026 94.90965:2312 121.98952:2351 197.87814:2766 216.45222:2263	59908552	67609592	1886625	56458040	63028104	61347892	62279988	61307280	5614008	499289	2775387	970737	1926725	7436871	3001221	8437756	1909413	7968163	1498538	1906193	7365387	1352162	3358284	66080016	1652068	2037639	1236896	53017212	6380266	51965392	6931302	61152932	29823722	29639700	52278912	62282440	59476352	61441164	60222328	5477422	61139164	58148904	55977984	58407588	61374680
Alpha-Lactose	MSMS	C12H22O11	343.12335:45738160 344.1267:6603384 345.13006:1128890	53.03954:21148 55.0186:26101 55.55902:10477 57.03424:55285 58.22048:11179 61.02924:671484 61.5535:12820 63.29657:11201 69.03426:151990 73.02532:21367 73.02916:263496 81.0341:50402 85.02898:829637 87.04456:22412 91.0395:299029 97.02888:258130 99.0444:30104 109.02872:49374 115.03941:17972 127.03915:92696 145.04944:102556 156.2469:12689 157.97263:14885 163.06017:81406	274993376	277099424	243883872	233857472	242875328	245222480	225213008	224338816	96743616	96280576	96827344	288704512	293076192	289103744	169164000	176255248	163295392	331321728	321166784	310955552	856658	252209216	247628752	281676992	281601920	286028736	166815792	164746272	163110464	332132384	330221760	355113472	256012848	254575680	256000368	263076464	262109136	260744032	452450016	452816224	451758400	172772000	177199536	174081968	107525808
Alpha-Linolenic acid	MSMS	C18H30O2	279.23199:283893 280.23534:54040 281.2387:192762	53.00316:1036 53.03934:930 53.89272:891 55.0187:1549 55.05511:1471 56.52168:682 57.06821:1123 57.07083:18560 65.03952:9693 66.76831:758 67.05513:4158 69.07067:2092 71.08658:1933 79.05482:1770 81.07048:2898 91.05483:1723 93.03406:3234 93.0705:1625 95.04966:2027 95.08604:2461 98.03696:1203 105.06997:1219 111.0443:3065 121.02869:30098 121.03973:4360 131.08504:985 149.02345:91497 167.03397:1697 219.0…	3702527	1038165	2608122	3818548	3441942	674308	2121310	974506	287285	3958270	2483071	265468	1292103	2310081	288517	213700	370789	193599	585520	632287	199767	843474	451676	2608440	3319250	3333332	3200808	698184	1535915	917382	1453380	1267264	1394802	3115349	10012155	1314633	1462817	509447	309003	455681	567616	147629	583454	430946	1086435
Anofinic acid	MSMS	C7H14N2O5	205.08614:3079066 206.08949:620733 207.09285:0	52.81997:1978 53.00305:10801 55.01868:2899 55.93523:3322 57.06856:2341 57.07087:30218 65.03949:250102 72.93803:15058 72.96789:2065 90.94814:3401 93.03417:16741 98.03681:2870 103.77499:2363 111.04433:20649 112.80919:2440 115.55239:2259 121.02871:35814 121.03988:22143 131.97412:3231 149.02356:83721 167.03304:2993	998239	137899	276083	146203	37565172	27542836	198173	61001124	22076566	17241352	6137852	7207936	15635610	726900	21022696	22392034	7729340	25164684	23184136	22626892	5610764	28564894	105987	231010	29737300	380137	18755722	933367	450289	163534	887864	136857	1140957	149632	647539	1543776	169879	133256	21978592	78737	1227838	141968	213979	170940	5733639
aplidiasphingosine	in silico MSMS	C22H43NO3	392.31339:587138 393.31674:271218 394.3201:89028	57.07054:1500 123.12334:1033 145.834:963 149.02325:4544 150.02693:2383 181.13538:982 236.16151:3097 356.98376:1640 392.31326:21720	3373886	6112459	3723678	7389390	7379231	3755614	361351	8273412	4664948	236029	257096	196603	3467065	5258509	1608486	1517247	5528525	2951763	143900	207829	117419	205701	162833	1219783	6069239	2280240	4110572	3566997	7517234	4374411	6145056	6691472	2169308	4016177	7100410	3498380	3986776	892191	4463019	3022551	3755833	3796905	3608419	3326031	3823328
Argininic acid	MSMS	C6H13N3O3	174.08748:343418 175.09083:141970 176.09419:38780	50.85701:605 52.98891:718 53.03942:1603 55.01893:754 55.93541:1453 56.69102:672 65.03945:3905 68.01382:1023 68.05035:3151 70.06599:1824 70.06995:798 72.76807:771 72.93786:2541 75.6379:891 79.05493:1469 88.16801:804 90.90385:1851 90.94792:1014 91.05484:21713 91.9039:1215 93.0201:935 95.04967:3404 103.04015:800 103.05476:2825 105.07034:1591 106.06568:5926 114.05527:3764 115.05456:3163 117.05765:144…	1875555	2622051	2385811	2994162	2300680	2524148	2445424	2481561	1320973	116597	67771	2153519	1618769	2586187	85796	1399034	38059	2577454	2882566	978156	1921396	1848843	1694050	614346	1677109	40750	1119624	588328	2292059	1748826	882976	859720	703645	689651	2335903	2179410	1922221	2134872	67776	1003943	1699744	25568	833660	1787378	2820123
Armillaripin	MSMS	C21H37O6P	415.2113:9372295 416.21465:2424133 417.21801:394293	69.03418:11850 85.02914:7055 91.05468:48470 103.05451:6708 107.08594:38872 109.32194:4538 117.07026:16195 119.08571:1053065 133.06476:15662 135.08031:19632 148.05412:4266 415.21127:12652	81662392	82602360	80635808	1281764	87624880	61350	599491	929468	1376675	937546	1653981	4227617	1871548	2651421	37398444	396269	31278768	2323664	351546	2305998	9049652	2415032	5661080	175930320	183999376	5822236	43468796	42189932	421205	40297716	38441620	34419272	645834	47103896	309322	148651104	144281488	136990336	153724304	155559104	150907440	230698	38459504	39506292	153725632
Austrobailignan 7	in silico MSMS	C20H22O5	365.13599:1541486 366.13934:327804 367.1427:33714	51.43107:825 56.74545:810 65.1384:816 79.2352:913 84.08659:925 100.84998:872 134.91089:993 143.89948:1004 271.83609:988 347.56274:1054 365.0929:1409 365.13629:16795	13762216	12584736	1746377	1841428	999505	11845411	15751030	12226304	243081	686037	724526	9677477	8958789	4577070	10822755	9374778	14541867	9972172	634584	1106982	10999251	530456	3306514	3296982	355957	4458732	14011467	9930071	14714233	8863042	14093979	5062590	11891893	10744038	11232060	14337126	867669	9654309	429631	10757315	12727341	8779415	11318899	11352406	4078187
Benzaldehyde	MSMS	C7H6O	105.03387:11478925 106.03722:928378 107.04058:98183	50.01603:744399 51.02385:2134369 52.30951:6892 53.00303:19488 53.03728:10656 53.03951:156862 55.0186:11013 61.75978:6810 65.00278:23612 68.62662:7898 74.01546:10054 75.02363:11418 76.02242:6837 77.03518:13195 77.03925:146109 77.90098:8054 81.03415:10577 86.0266:7777 95.04965:327138 105.03408:49369 105.04509:90529	166277776	167736336	171607744	176731168	171365776	172338736	175696688	176369488	92746088	88938312	89036256	149357408	151212848	155842880	155314656	84598224	153745600	152673408	153588080	154036608	151123840	151677360	151497760	152426192	152379168	153095424	191741456	191628144	113342472	131638864	132992544	133029648	385845184	384072256	128998376	132785264	132717848	132699184	140162496	140719088	141159184	145696912	143364048	145937808	154923872
Benzamide	MSMS	C7H7NO	122.07132:1421614 123.07467:209592 124.07803:0	50.71747:813 51.02383:3112 52.0191:1009 52.47133:671 53.00294:917 53.03938:914 53.2474:579 54.0346:3262 56.96546:2697 62.92977:2212 63.92892:839 71.38903:611 80.47949:776 81.0453:1711 86.79434:733 93.05811:808 97.00813:4384 106.06555:722 122.09657:1561	15133648	15362972	15398417	15223886	15341249	15781668	15154720	15662199	14322287	14212739	14413920	18585210	18847176	18058932	12301451	7789182	11881924	8117236	16942652	16594016	16158831	15528087	15613430	7576612	14243580	14054143	15371447	15606893	15710619	17980856	17833736	18043380	13923381	13660565	14634712	13579806	13601541	13952830	13046907	12667427	12756059	14550025	5994098	14827862	15238019
Benzenebutanoic acid	MSMS	C10H12O2	163.07533:1487132 164.07868:141918 165.08204:159314	50.01599:1978 51.02182:864 51.02392:12428 52.17187:615 53.00304:1189 53.03954:22312 55.01868:1690 56.75434:728 58.20549:651 60.09354:578 65.03931:1206 71.32269:640 72.24304:680 77.0394:8138 79.05488:1696 80.05003:775 81.03414:2352 88.57038:692 91.05478:2314 95.04975:43699 98.52524:744 105.03408:15585 105.04514:10422 117.05782:1481 163.07533:1339	17699032	14373157	12433574	1584804	12227095	5634516	15006700	19547228	180462	214012	142873	113694	63719	122328	160013	5215408	139849	71047	127090	91925	110650	4812328	100532	165337	1663650	6077976	827628	3642926	90088	9910901	13041698	5864186	4022536	15540857	4124777	17722108	14817270	8839318	3845045	4502374	99817	13396502	12264938	8556714	6584979
Beta-Citryl-L-glutamic acid	MSMS	C11H15NO10	322.07684:6534417 323.08019:761149 324.08355:122405	52.55459:2709 53.81133:2842 54.40151:2651 56.05035:125733 57.03422:5010 57.12149:3174 67.01856:20931 68.99789:20257 79.05525:4869 82.02929:6151 84.04503:235422 85.02908:54799 87.00784:3770 89.59029:3331 94.06519:3932 102.05527:23971 105.03407:19875 111.00789:8547 120.04434:12796 122.06026:10494 128.03404:6212 129.01845:35787 130.04984:30895 138.01857:37281 139.00287:7553 143.97758:3597 146.01306:…	25303488	25674810	25192102	25915388	26042818	25495636	25251226	25805240	10131194	9777888	9829497	40978640	40899508	43004512	8891577	8905303	8756781	23370836	23158952	22879524	23751142	23346254	23260240	20808022	20996584	20946546	15248178	15600460	15470081	27050606	26607300	26990208	10339515	10030761	10134999	17524996	18010278	17866530	23831236	23917546	24261656	23253742	22664722	22713700	31121358
beta-Sitosterol 3-O-beta-D-galactopyranoside	MSMS	C38H58O4	577.44421:5746295 578.44756:2162300 579.45092:391763	57.07077:34439 57.29354:2848 60.31597:3239 67.05499:7812 69.07052:9509 71.04987:29317 71.0863:37453 74.32214:2590 80.50535:3761 81.07065:22024 83.08615:11811 85.10171:21290 95.08614:23191 97.10175:3814 99.08078:11243 105.75529:3618 109.10133:17830 122.3529:3068 123.11666:3079 127.11208:7144 151.54701:3054 155.14297:15381 163.28651:3055 183.17508:5038 191.00708:3134 198.21042:3508 202.44698:3425 2…	411398	4060345	19772718	80675688	10460452	2218748	7003407	3478131	8049697	6699640	2401775	4165174	3736274	6483075	2571704	9098921	2703776	2450401	7622615	2978009	7369331	2907301	592041	4965374	4167771	2665088	2719705	316038	2250966	748004	1329580	132550	3548262	431727	421982	294816	460857	152061	346048	242533	359088	124658	1163842	1997633	431500
Betaine	MSMS	C5H11NO2	118.08656:6417706 119.08991:445550 120.09327:22476	51.02382:1743 53.00305:2116 53.03934:1498 55.05517:21910 56.05041:17427 57.05558:1358 57.05822:22199 58.06604:36227 59.04999:2374 59.07377:1843 59.93111:3492 64.94292:1024 68.04166:936 70.58931:941 72.08161:11820 76.93404:962 117.96722:972 118.08614:1311	44128964	45454452	2720912	47764936	47667556	45791168	46907544	1527349	3985580	2353496	1209684	2575046	1403719	686224	840918	3086149	3649932	1523988	1043684	1258717	1357497	2082691	915925	759260	1443909	825231	35813872	2240922	783663	45818264	44579684	44110440	46429820	40830856	1477453	30688362	37533880	2590044	929104	2481133	42134880	49738844	555069	1470072	50001276
Buccoxime	in silico MSMS	C10H17NO	168.13824:2296303 169.14159:336110 170.14495:108700	53.00295:1396 53.03943:2205 53.93983:4153 55.05511:10618 55.93522:1176 56.94668:840 56.96565:3770 57.07063:1160 58.06586:4427 60.48458:944 65.03918:1429 67.05502:9601 67.93571:7138 69.03418:1707 69.07072:5684 72.93797:1096 79.05482:7601 81.07055:19444 83.08594:1012 84.95989:1262 91.05487:1979 93.07051:1755 95.04977:1433 95.086:3961 96.04501:1280 98.98436:2498 105.06984:1435 123.11697:6182 133.101…	21492448	21865546	22666100	22204862	22508624	22503244	22208606	22548926	32453962	32513674	32537036	108912	94197	147230	30105318	29989458	30059636	70069	106468	79449	89757	75768	147799	47449	83817	93661	38036240	38286600	38355256	30826736	31039204	30885550	31638412	31749744	31853594	121842	80894	125291	75204	90227	137762	32546722	32701744	32492174	60925
Butyrylcarnitine	MSMS	C11H21NO4	232.15417:89819392 233.15752:11104483 234.16088:626727	57.03437:170238 58.06596:25137 59.89265:6603 60.08162:116440 84.08139:66452 85.02898:1872746 86.59261:8787 87.82181:7468 91.12788:8262 129.07858:9151 143.89635:7493 144.10165:11387 149.71199:9626 173.08121:33106 216.13676:9552 232.15465:72953	573755008	608905536	576112064	571071616	587761728	28055464	620871296	589247296	756542272	751094720	753401152	593612224	603897024	578799424	524991104	524259168	518682048	608068480	614917632	599744000	492599200	490594496	495195200	695789184	700605312	700881856	558386752	559454528	547287232	459314880	459641728	466515808	603857920	606270848	612800192	574445824	571683392	573405824	538946752	537445312	536358176	538013952	518705472	515009728	616468480
Capric acid	MSMS	C10H20O2	173.15375:553862 174.1571:1565656 175.16046:246000	53.00306:1407 53.03944:731 55.05521:4684 55.93515:2261 57.07069:1834 58.53491:641 59.05:5824 59.4514:699 63.90866:654 67.0548:866 71.30956:687 78.66232:644 83.04982:751 85.16974:744 85.30766:654 89.90025:825 90.90378:6616 91.05477:804 128.06216:1446 159.77621:686 168.9722:862 173.08017:756	7791834	4081278	3502054	5056154	4521538	7753764	5164739	7173860	3481616	2948348	1028059	1196562	3534354	3970769	4105119	2253257	2694926	3950508	2572658	2054855	4060576	3655239	4628626	8776431	1452472	4690886	3965405	1981315	1914362	3936243	4594292	1408602	3174025	4023806	4336230	2157906	7270578	1609493	4522242	5208661	3151386	3913774	3387713	2558380	4456247
cholesteryl beta-D-glucoside	MSMS	C40H54O	549.4129:4883983 550.41625:1588433 551.41961:290360	50.7601:2699 50.96521:2877 51.3151:3564 57.07074:37826 67.05499:4872 71.04989:29942 71.08636:26104 81.07043:15398 82.17588:3616 83.08649:4268 85.10151:20969 95.08598:18423 99.07475:3365 99.0807:17570 107.04961:23672 108.05309:7168 109.10178:12488 127.11195:16153 149.05989:7643 150.06445:3379 155.14354:7779 163.11153:4350 180.74692:3766 271.1907:7161 299.22208:6391 302.18784:4716 355.28674:4694 42…	119851	29819	27085496	66114344	427223	4671874	849130	4874601	1322174	232931	240924	117046	460674	384477	261305	408331	382872	516490	2234284	283009	507068	1447578	306543	865738	184721	215741	237986	36229	11349	9121	14570	62233	151129	182135	974264	1831153	2819464	2002090	1397033	11688037	6740785	1108286	7688068	9455375	4579984
Choline	in silico MSMS	Spectral DB search	104.1073:346201056 105.11065:24394284 106.11401:1518632	51.99294:54390 56.05019:140604 57.34114:67327 58.06597:5176675 59.07364:117374 60.08158:958916 60.09042:64251 60.69001:63204 67.63417:67820 83.66189:89249 104.10742:545152	2233763328	2223470592	2237405696	2274529024	2294076160	2299089152	2283656704	2253582080	3169698816	3139825664	3149423360	2553438464	2614652928	2474570752	2094625664	2076295424	2034502784	2613138944	2571150592	2560368384	2625882880	2610873600	2613775872	2562882560	2541118208	2576587776	2631687424	2629233408	2631221504	2584013056	2579105024	2572158208	3366728192	3374146560	3334043904	2335305728	2329415680	2341068544	2264923904	2271555072	2282660352	2559735296	2555425280	2569696256	1978451840
cis-Aconitic acid	MSMS	C3H7O4P	139.00256:14463211 140.00591:1199183 141.00927:190895	52.62547:7712 53.00314:41475 53.00512:6340 55.01871:177806 63.41358:7100 66.06942:7973 66.45644:6762 66.86427:6536 68.99786:587479 74.28219:10076 80.26906:9295 111.00803:14621 119.51034:8760 121.25942:8794	131668088	132423872	133575432	134991712	131881128	132630176	133535432	132124168	18673224	18992514	17554130	33722792	34701844	171000864	65674204	21126348	62072308	113824312	113361488	37784720	34123644	32678268	101749296	30374120	30053802	30619024	30429380	30943412	77330728	127176600	124422640	125798912	18270738	30429300	30923532	29850448	73840160	29267944	31025728	114657256	31646200	118439552	118767312	118239248	138371696
Cis-stilbene oxide	MSMS	C10H12O4	197.09607:17322320 198.09942:2422381 199.10278:197672	50.01599:13864 51.02388:87423 53.03705:21034 53.0395:337855 55.01878:15824 61.58134:10290 65.03944:181008 77.03912:79583 81.03407:38766 83.02093:11231 88.11777:11235 91.05476:477478 95.04961:634533 97.78008:11285 105.03392:346541 105.04472:125115 109.0651:76098 110.18355:9802 119.0494:118218 119.06029:44208 165.94661:12570 179.58224:11394	193815264	194226688	210802880	208259808	196978048	197982304	202493424	202851488	192703	386690	84830	384321216	387855904	400140160	391942	177311	232628	374801888	390683776	391093440	523907168	528082976	534294656	151650192	291913088	295973888	120235	159087	142975	127316	101196	159307	146959	101249	123918	315810528	315284320	316417120	661334784	655864000	660303232	135591	367336	147321	570528448
cis,cis-Muconic acid	MSMS	C6H6O4	143.04858:1504818 144.05193:0 145.05529:136452	51.94083:1375 55.05511:1848 55.9352:2890 56.93573:887 56.94312:717 56.96559:928 57.94359:623 59.93107:1303 60.98727:2963 66.39678:569 66.93909:1588 67.93568:1683 72.93782:2952 73.93821:1107 78.9977:7642 83.93049:825 97.00815:83663 110.73637:686 118.19684:659 119.95113:2232 120.02396:4376	16710193	10191016	20007638	19005942	18152666	16631832	19316952	18255926	6109607	6327620	5534356	23235830	26344108	21295646	4359295	6503754	6465932	18426588	6609856	31055970	15156597	6855966	13006773	2763484	5313158	4274901	4395282	5780706	5511340	20183638	19182544	5979676	9949799	3791865	2815538	4344699	4368442	4605213	5691002	12091341	2737482	5985443	5384224	5189690	4330322
Citraconic acid	MSMS	C5H6O4	129.01828:31581924 130.02163:1995252 131.02499:775512	52.8485:19312 55.78201:20761 57.36169:22169 60.54947:22206 64.9024:21157 68.99786:3403414 74.92497:23000 85.21599:23964 95.9849:29453 98.3299:26089 109.56313:23052 119.00633:25800 119.01836:28540 120.17872:21883	253143216	253294080	257768448	264275024	254289808	255600560	258829648	259497872	115200176	118297384	117837664	1618375	1744243	375204576	153388672	152680096	148773136	267864896	265347344	266013344	240139488	241645280	241309040	209504256	204561104	211524576	184904432	185790144	186765872	292150976	291144608	293390336	78939288	78306272	77728328	179806288	178242512	181149056	269409984	269298528	269491648	275886624	274264224	277857792	317376480
Clausarinol	in silico MSMS	C24H30O6	437.19379:10140140 438.19714:2689792 439.2005:452022	288.58011:5360 322.45245:6864 437.19363:355597	83229	4713204	4215	3445	100711632	1731943	97865072	1848559	118616	53760	55100	529476	82238	48837	259.86	4433	3120	3389	3454	3092	259.86	3563	93177	153838	2928	249973	259.86	300062	145296	28474	259.86	174449	488251	395548	3377	1385845	2440869	53439	946637	2868932	2906548	150936	235555	259.86	3721976
Creatine	MSMS	C4H9N3O2	132.07677:335648576 133.08012:20201422 134.08348:1900438	53.98248:137704 90.05546:279903	2368472320	2387597056	2376099072	2387296256	2393883904	2430773760	2384874496	2409878016	1996731520	1990700416	2003735424	3309392896	3363721216	3321416192	1871049088	1866769792	1850192512	2538865920	2527847168	2508608000	2443115520	2437901824	2418095872	1725535	2341645568	2335945728	2198607104	2200078592	2194222336	2643803392	2669940224	2653317120	1657260032	1634017280	1640573312	2532366080	2541464576	2530134784	4104972	2643405824	2653712384	2437313280	2456861696	2448346368	2516674048
Creatinine	MSMS	C4H7N3O	114.06652:37445532 115.06987:2365968 116.07323:322914	55.93509:15932 59.81647:14731 67.33542:14058 70.62507:12545 71.45032:13696 72.93781:24311 114.06663:41858	262769008	262010576	268362368	269927328	271087680	277969184	276063680	272710624	310937600	306501344	309059648	230209616	235735328	206541632	339116064	337418720	332709888	228479440	227190400	227122944	252100464	258544976	257876240	253772976	251422320	255230496	266515056	265278768	262294800	238689520	246344944	246172256	252544800	241509984	241606880	244681088	244616272	244778912	244466432	244176240	243445120	288011264	287278880	287207392	244647808
Cyclic AMP	MSMS	C10H12N5O6P	330.05972:1432175 331.06307:168759 332.06643:0	57.03381:979 60.33566:918 69.03419:2991 73.16557:1189 77.92065:1020 92.54025:1030 94.04028:2306 97.02857:3659 98.98472:6119 118.74266:1234 119.03536:3895 119.37862:1414 136.06172:225259 137.0459:5144 145.70584:1142 221.99286:1115 304.74368:1290 312.04733:1539 330.05936:19680	5785113	5664914	5967642	5930582	5959514	6018859	5929334	5924185	2148525	2085566	2147854	4110678	4327866	3955686	5119974	4936040	5022942	12228816	12184253	12073695	4828335	4884130	4734261	4338549	4309320	4343130	4377834	4478430	4490536	4774918	4826230	4859744	4479014	4452938	4530714	6871350	6827018	6866454	5775118	5644804	5821104	3855876	3628454	3726067	12867921
Cyclohexaneundecanoic acid	MSMS	C17H32O2	269.24768:688279 270.25103:116032 271.25439:52148	52.70006:707 52.8327:661 55.05508:3376 57.07069:2944 67.05492:2750 69.07059:2863 79.05496:923 81.07043:1696 82.25582:792 85.23021:873 91.05456:1238 93.07124:1024 95.08597:2577 111.46307:1104 115.17899:872 125.29696:910 153.99283:850 178.34262:888 269.20935:6504	10538957	4993944	864430	128274	11043069	12069288	150531	10067639	10528545	2016586	9118744	9472794	2113365	5025678	5258669	3024032	792322	4821247	2465004	9517163	519299	4934326	360861	6188534	113625	5518792	5284250	3144068	5071118	9752532	5248275	132450	123034	4802120	85111	63933	1612852	138113	77708	9948414	202999	9975460	4220452	9502332	795011
Cytidine	MSMS	C9H13N3O5	244.0791:23490296 245.08245:2092279 246.08581:329900	52.01896:2558 55.01854:2310 57.03425:3917 67.02984:5587 68.01375:4019 69.03401:2045 69.04549:29614 71.01335:1632 71.0247:1520 83.68559:1271 94.04037:14622 95.02444:87660 112.05077:363889 113.03462:1076 120.50188:1049 126.64548:1140 165.31184:1137 220.86485:1299 226.06897:2861 244.0789:12449	235613040	236781904	241729376	242993856	246379792	555190	641431	246300544	290886816	266576592	267793296	830219	1019303	616446	214618256	205743568	203701424	240461152	214102160	218779392	584036	264727936	671221	239423488	337851	260817888	287776320	268994880	288331552	267471616	268932384	265758688	265232656	264917744	267075968	224776672	218053840	220731120	187709920	185901552	184194096	210957152	212736400	210324464	206824496
Cytosine	MSMS	C4H5N3O	112.05094:2790212 113.05429:212055 114.05765:794993	52.01916:61363 52.42632:1485 53.93991:2824 53.99835:1829 59.93108:4415 64.39008:1666 65.6127:1630 67.02994:19903 68.01395:14355 69.00932:1894 69.04539:5157 70.94253:3475 79.84904:1926 95.02456:28554 112.05099:14450	16281609	16915036	16179225	16676053	17675718	32056602	17593028	17819176	1137150	12999857	12541977	1698287	46695792	19263366	1493756	1379322	1361663	1472206	1404877	1371885	1506896	18529458	18280164	8688128	39306680	15883080	15778948	14643902	14735406	16604314	16162864	16413873	20765864	19644078	20017344	1276517	45594284	1219376	42698936	1456045	41430656	14913008	15110042	15016023	12415271
D-Arabitol	MSMS	C5H12O5	153.09099:616436 154.09434:64740 155.0977:251230	50.01603:591 50.80552:533 52.75196:613 53.00299:2062 53.0394:1781 53.94002:7531 55.0186:1217 55.05502:2552 55.9352:4404 59.93114:4772 61.33186:585 65.03936:3704 67.05496:2900 68.99788:11923 69.03441:749 69.07051:1170 70.94252:43879 70.95861:917 73.62457:765 79.0548:1437 82.04181:826 88.95293:23311 88.96895:1239 89.95372:880 91.05457:3641 95.0495:4747 97.02888:734 97.06504:1020 98.34118:694 99.135…	9231242	4600690	8843187	9410038	9556543	8031635	9426723	7447479	5018687	4262858	3786279	7384673	7115536	8081266	3716037	4264388	3945377	7802168	7191054	4155871	4219695	7934116	7945876	3559140	7473548	2967590	6783294	4411070	6418420	7276348	8752075	8486221	7256198	7946613	8190052	3589972	7601574	7149722	7813369	2260816	3277947	8551185	1238151	7206496	7089516
D-Glucuronic acid	MSMS	C6H10O7	193.03452:10795087 194.03787:726265 195.04123:161850	53.21576:5281 55.01873:36537 57.60476:6366 66.94846:6721 66.95202:5281 68.99791:702460 69.22395:5843 85.26524:6421 87.00829:34190 111.0079:32332 123.40443:6019 129.01819:34859 139.00276:18217	88555792	87650600	85348272	81444872	91027032	92065280	88140592	90220232	53775116	53894292	52962216	2072143	2010624	2355624	62113288	707018	57702428	99678584	907163	96196312	86187552	87386200	86237536	75276400	75688336	75819352	959819	68172504	67369088	101756352	100706808	1415946	29572250	28467050	29144082	62882772	63316188	63638020	1469286	90985696	90897160	94823056	94409208	93403792	105627424
Dehydroascorbic acid	MSMS	C6H6O6	175.02388:12019069 176.02723:929075 177.03059:235555	50.58944:6139 55.0187:28578 58.26191:6779 68.99795:439314 82.76417:6547 87.00845:11882 92.23605:7191 111.00815:15632 139.00255:11755 157.44739:9328	98382320	98734272	95963344	93006104	99965480	100111184	97780272	98465488	55490352	56079276	55430704	5536471	155370528	6787214	2389094	2393664	2352502	109966432	110436856	4145686	3844262	3873514	3867019	3444506	84056416	85515744	2961796	76241352	76139224	114507344	113710768	114520864	32646356	32282222	32422384	2932106	71430240	35607116	104375216	103057480	103386080	107810192	108086056	107213512	120089184
Demethylated antipyrine	MSMS	C10H10N2O	173.07834:933387 174.08169:66554 175.08505:119279	53.11275:641 55.05518:4881 55.93519:1910 59.04993:1431 71.29314:785 71.92994:938 72.93787:1003 90.90386:6991 91.05486:1036 91.11238:808 99.16669:825 100.65234:842 108.9138:1029 111.65699:1030 114.9705:819 126.92451:804 138.85773:1006 173.078:1737	3696885	2304325	2738454	2966131	2514620	3540207	3405007	2493909	1672994	1523442	2109442	1422554	1883123	1243920	1279836	1859739	1487714	3969253	3012532	2327528	1466566	1486747	2732244	4128268	1777504	1454150	3135280	2332296	2300699	1855855	1520268	1699742	2549782	6792746	2074520	1662489	1671986	1793111	2203392	3091763	1786376	2941768	1588069	1925298	3612674
DG(14:1(9Z)/20:5(5Z,8Z,11Z,14Z,17Z)/0:0)	MSMS	C37H60O5	585.44916:3574286 586.45251:1435292 587.45587:290975	50.03669:2125 50.08765:1938 56.2929:2458 61.52805:2231 74.01575:2225 75.46709:2245 86.88822:2271 92.15672:2582 115.62456:2265 183.25069:2420 211.55949:2624 257.15094:10462 370.59122:2585 510.36896:5680 511.37595:106558 529.38647:9602 541.46075:6153 565.26947:2818 567.43616:11099 568.44275:3396 585.44861:69428	3331302	52837912	266.718	138888	266.718	31760	266.718	352945	5533	4654	4544	27724	933620	3445	3915	3211	4256	4513	266.718	266.718	3373	2667	266.718	19455	266.718	52965	266.718	1257393	1016540	6743	3417	266.718	3851883	33892	26678	33525	7132	3143	4068	17233	3938	3623	266.718	3285	14543
Dicyclohexylamine	in silico MSMS	C12H23N	182.19044:707635 183.19379:99027 184.19715:20380	53.00304:982 55.05513:26822 58.95416:770 61.34179:561 65.03942:666 76.87171:782 83.08621:3929 88.27878:637 91.0424:690 94.35997:753 99.84068:645 100.11277:1073 108.31105:666 109.01089:1182 120.20726:726 126.23283:798 132.80067:615 135.01479:761 166.98529:1752 178.06792:745 182.19032:4129	8870092	8911957	8378887	8197364	9563662	9571980	8304458	8691253	5721970	5140477	248288	4360934	5398468	10420064	5466700	5356660	5002380	8846890	9809705	8995164	9728553	9329313	9764928	4644198	10180270	10294212	5647468	5686800	6083642	5400990	395004	5800628	5440396	5630420	5846090	348880	9860121	9999730	10751385	10582470	10683077	5759380	1170050	5446555	10470031
Diethylphosphate	MSMS	C4H11O4P	155.04683:2306999 156.05018:148303 157.05354:374156	50.49664:4855 55.93531:148767 70.10077:5458 72.9379:979383 90.94827:204231 98.9848:25461 103.0403:6070 108.95862:20200 113.96404:12660 130.79326:5055 131.97469:16003 136.26527:6696	36303084	36953432	34964876	34071992	37590392	39626392	36534800	37765096	32972288	18465964	36568668	18472836	35166768	22500438	32909978	32191400	33624780	38713744	19528994	32843442	19148480	33006950	35246428	32946738	34210584	32388118	18782222	32335990	19242372	28296832	33954300	32418642	34934764	19035214	34264860	32752704	18427052	33662520	32212972	31649702	16961902	34191852	35578388	34056000	31227602
Dimethylallylpyrophosphate	MSMS	C5H12O7P2	244.99869:81427 246.00204:0 247.0054:0	53.00303:1098 53.03937:3045 53.80217:924 54.03249:1007 54.0348:13132 55.01882:10908 55.05499:1411 56.05031:3667 61.02916:1401 65.03951:8886 66.76417:954 67.05494:1379 68.05031:13713 69.03422:2191 78.03457:1282 80.05023:9618 81.03428:2274 82.02938:3816 82.06584:4044 84.0451:6984 85.02919:1179 92.05009:11190 93.03405:3096 95.049:1224 96.04499:7958 97.00798:5737 100.03983:32601 108.04478:5925 109.02…	248578	244904	299531	389060	127237	258456	262105	332367	24785	42338	12354	96408	112510	98179	221426	257681	147877	244914	207181	131914	240119	185952	81781	302098	662930	390007	283522	100551	242227	230547	151330	184016	125397	246296	183488	164992	231255	274245	229901	265346	126257	291104	316004	102917	471858
Dimethylaniline-N-oxide	MSMS	C8H11NO	136.07323:589339 137.07658:137792 138.07994:71484	51.02382:1551 53.00307:1177 53.0394:1448 53.92507:588 53.93991:681 59.90864:546 59.93108:1215 61.71019:572 65.03941:26506 65.10449:542 68.98008:3349 72.93777:842 78.65584:566 91.05477:13373 93.05787:836 95.04966:1107 106.06552:1312 108.00279:968 109.01113:6331 117.21837:703 120.08068:3071 122.63028:642 136.02167:5573 136.11185:854	6287740	5632449	7794367	7311602	6277574	6378580	6873516	8236426	4718382	8432518	4891022	272794	206090	259681	9117030	8703609	4116276	216648	187954	134764	165752	110582	168467	192326	219682	94538	9754788	11254186	5977738	6575171	2145758	2928558	4766706	9330701	6584667	163500	158799	211226	216470	197433	147012	4098110	8922853	9424039	161546
Dimethylarsinate	MSMS	C2H7AsO2	138.98616:231859 139.98951:2134286 140.99287:194663	50.0161:5135 51.02389:22548 52.01905:3657 53.00307:1201 53.03946:971 53.31517:711 54.9479:686 55.01873:843 55.9353:4546 55.93741:751 56.05032:804 56.93566:1410 56.94307:1227 56.96567:6117 57.93561:1975 62.94694:3694 65.03943:2180 66.03464:804 68.99786:1366 70.02956:1042 72.93787:3886 73.42012:749 78.03037:1329 78.03458:22613 79.94953:2623 87.93415:761 90.94804:1703 96.04494:9960 112.03964:4117 11…	1728388	1767574	580281	451851	1022855	1090680	1853859	1958984	1376960	220189	24265758	67824552	1424383	1502500	1716009	62906612	61829120	113873560	113319736	111635824	41029868	102071776	102228920	87000120	86511056	89370576	41847	77001952	77258256	127240680	124388552	641215	30621730	30267610	698504	74848832	73718480	1232099	114378920	1179133	115232480	1175767	1527516	117863696	1437048
DL-2-Aminooctanoic acid	MSMS	C8H17NO2	160.13312:235165248 161.13647:21779876 162.13983:1601241	54.01696:122075 55.05502:3416636 58.06594:1290820 58.3481:135117 59.04989:826267 59.80708:133851 60.08156:1407384 83.04982:182142 101.0599:460668 154.1373:184505 160.13214:443262	1949433216	1976267776	1963948160	1959832960	168360	2011007232	1986944128	303366	2507873024	1155194	2515464448	2018986752	960758	1904180608	2057037568	2008266496	1981896832	1683551104	1234829	1031497	736280	1140374	2591073792	2105290496	2105832448	2100039168	2332851968	2343541760	2345840896	2487738880	2503815936	2488628992	1856791936	1834692992	1854870144	1915933824	1905050624	1895408768	1930946176	1926666112	1933151360	2196067584	2208135936	2197981184	1969600128
Dodecanamide;Lauroyl amide	in silico MSMS	C12H25NO	200.20065:6032140 201.204:716330 202.20736:203021	51.42497:4071 52.31512:4039 55.05497:13187 55.93511:6422 57.07056:17537 65.93092:3921 74.79425:3940 76.54453:3928 78.47629:4244 80.43993:3856 80.46699:4400 88.07642:5252 121.89338:4445 132.86736:4523 133.97279:5185 149.11749:4528 182.67892:4624 199.8573:5556 200.20088:19894	76821792	76834992	86070480	89613032	75512016	77312440	80377136	80919424	62223584	61676032	64446208	62240828	33071932	66149696	68597280	33387236	71313616	69862112	71859376	73077480	71437728	73662600	72578024	71793336	3208200	72259288	74152600	72907168	76186472	71956344	74867008	74435856	77433784	77677128	78666264	73856544	75298368	73344600	76096488	76627704	77952032	73450104	75835768	76155456	77905000
dUMP	MSMS	C9H13N2O8P	307.02414:155806 308.02749:541131 309.03085:31379	54.03464:3065 60.39728:2231 67.86877:2535 70.06576:2489 80.05009:4264 81.04538:74402 92.1087:2586 97.46292:2493 113.02997:14432 116.09843:2514 122.07142:337555 126.03703:10623 131.2583:2528 144.04773:88772 151.00148:2565 164.08182:59490 179.69203:2734 307.12222:4750	423052	432825	380661	451093	422802	432066	357650	403364	154405	87862	194329	461623	532172	344640	1307728	1228321	1263606	1054025	910634	954966	746548	772115	790388	786119	795108	782130	870620	773933	797860	787436	868041	850933	626427	639946	639942	703563	761440	680815	862016	965544	915236	894884	993509	1057510	171763
Ecgonine methyl ester	in silico MSMS	C10H17NO3	241.15463:1916689 242.15798:291789 243.16134:26538	52.66448:1166 53.93991:1602 55.055:2300 56.05031:1397 57.1731:1284 57.88347:1281 58.066:97247 60.41653:1026 66.00625:1201 66.57999:1317 70.06591:18927 70.94239:2068 72.08166:3468 84.08139:33504 98.09688:2890 102.9472:1229 114.05518:1621 128.10696:1697 165.72211:1453 174.46333:1766 196.0976:2241 221.26295:1496 237.97945:1519 241.15442:42794	14319797	14278030	39781	14407707	14491392	14712964	14417328	14879025	8760489	9246096	7967924	15847275	16321419	16425023	235740	11163842	11327789	9850489	8163164	9844649	7068329	51468	7133553	7432439	7210187	13962304	14453697	14177899	30903	7332684	15652524	8651276	175393	44179	80371	15912712	15990120	8487937	8928193	8236712	41968	14852979	9116866	14055077	7695197
Estradiol	MSMS	C18H24O2	271.1879:5517390 272.19125:815592 273.19461:355517	57.07061:9120 91.0546:2985 95.04939:9280 140.55016:3126 271.18771:57366	82743952	79618456	96571808	96348768	77025088	74632736	77049560	85263880	52069480	27256494	26379520	30408942	34555200	76545112	37357392	34817160	67231000	71992808	78182384	72595184	76918608	77280600	39744000	83195728	86329784	84201416	66218092	32496136	65707232	74242240	76687800	71947856	33476374	37816888	71214568	87977936	82852992	43240884	84236448	84289272	46681324	70606328	76951680	73814368	88934192
Estrone	MSMS	C18H22O2	269.13574:4314532 270.13909:609303 271.14245:83646	52.30027:2967 61.18534:2700 62.54418:3709 78.06756:3023 78.11787:2805 90.65665:2953 90.84833:2840 229.03516:3335 269.13574:37389	52402252	3862100	38695352	40124312	99051624	242219104	46624712	104554792	103636	10921	6786	6820164	224016016	68769056	12496	11050	88060	6314679	37262168	57613272	217192400	125467448	6350386	78878520	532932992	69228936	77139	517291	39332	51958	333847	360319	11802	14089	68729	7820846	317609568	72702136	87288376	672226624	681714880	45951	38827	44712	130331712
Ethoxyquin	MSMS	C9H19N3O3	218.15393:1376859 219.15728:307721 220.16064:136184	55.05507:1479 56.0584:1210 57.8988:782 64.39153:707 65.03938:2086 76.33881:903 79.05486:4120 80.04967:1086 83.04984:1303 91.05479:3046 94.06563:1640 95.04997:1725 97.44714:856 103.0547:1897 105.05781:1369 105.07:1513 106.06552:3470 107.04951:3505 109.05254:861 110.05997:1153 116.95828:821 117.05753:2577 118.06544:7036 119.07301:1427 120.08104:4802 122.06017:3962 126.0582:898 129.06958:1891 130.06…	3911801	2009480	2689990	5041776	6958005	3203583	3910894	13720295	3562633	2329563	1887499	1523877	3692738	2173422	2249388	1701798	2087794	3178639	11498006	2959260	2842972	3083676	2547885	3838472	2924554	1511574	1319562	1895907	10753140	7729990	6091736	7004338	3672079	1731387	4158306	2552234	2783927	2116455	3144798	6580680	7913708	3229213	1981758	7756584	2032097
Ethyl furoate	MSMS	C7H8O3	141.05084:4586234 142.05419:758431 143.05755:1380994	51.94087:2427 53.03936:1184 55.01861:1178 55.05511:962 56.31112:975 56.96561:2531 57.93565:13235 58.85477:1138 58.93344:14269 58.95425:5858 58.96166:1178 58.99866:36439 59.01073:1104 59.93097:2957 60.94645:1031 64.94306:1735 67.93573:13017 75.94586:1402 77.00906:22141 82.01463:1779 91.12239:1152 92.91724:1124 95.01935:8991 100.02475:17510 116.97173:2133 117.96621:3710 118.03512:24333 125.70078:12…	37382032	37639780	37570636	38253236	38118612	37339008	41266048	43209544	16697027	16877118	16098636	62953376	61407656	55619024	18806528	26925138	27792610	49616640	46400072	48824160	39864496	37039976	38629416	30836048	29542108	30064002	22864832	21694950	22542450	45820296	43856016	42799840	15711411	13827424	12355851	28353096	29983242	26458022	34989432	38582796	37996200	24971224	24298292	25625066	41903864
Ethyladipic acid	MSMS	C8H14O4	173.08148:1403190 174.08483:142078 175.08819:178089	50.50389:909 55.01885:1979 55.05519:21021 55.93515:5670 59.04994:4457 60.47141:1003 64.32905:1175 65.16122:1355 67.93574:1690 71.92999:1678 72.93066:1320 72.93784:4492 74.74935:1140 77.24191:1230 83.04977:3199 84.96803:1229 90.90387:26319 90.94836:2301 91.16239:1212 91.62939:1327 96.03534:1162 97.00817:2080 108.91438:1649 110.20289:1194 129.054:1393 144.77448:1312 155.0701:1583 156.9395:1505 173.…	4449411	2239780	2114009	1680136	2016479	3363259	2018054	2579749	919295	1107704	1298098	1321036	1092751	1583863	1928894	1434613	3017588	707062	2142482	1528895	1420430	2710394	1702098	1631695	3212245	1020726	1495390	1671170	1832128	1870356	2906305	1125033	2576335	1463825	1561605	1153707	2076638	1718706	1418817	1481537	1325630	916909	1454779	1261584	2454928
Ethylphosphate	MSMS	C2H7O4P	127.01561:864528 128.01896:45218 129.02232:190879	50.35775:594 53.00306:821 53.03923:809 53.44645:554 55.01886:669 55.05505:600 56.96555:1110 57.07069:695 59.86879:566 67.93556:1647 68.33659:666 68.94347:773 73.86906:674 79.05491:738 81.07038:896 88.75266:745 98.98463:77556 116.99509:3743 123.66975:770	6748305	12289781	13618724	7609298	13689389	6866580	14615621	8394187	14234470	7620275	14073923	7687043	12906519	7152972	7511169	4447779	10909459	8735314	12613976	9518028	12769467	7367924	6406128	5623092	12253873	5446663	3870508	9227444	7454771	12733669	5713486	11887289	12700914	8576584	7228726	12560693	11417480	13303196	12329673	12257686	4841922	11745875	12369971	13280902	11878578
Eucalyptol	MSMS	C10H18O	153.12743:862657 154.13078:76034 155.13414:167391	51.02375:951 53.00309:2329 53.03958:3383 53.19759:572 53.93983:1527 55.01871:1547 55.05278:760 55.05515:9130 55.93513:2413 57.39165:544 59.9311:4255 65.03951:3484 67.05509:6235 69.07058:2809 70.9425:6913 75.21443:552 77.03918:837 79.05486:3927 80.02636:599 81.07049:2331 81.93437:638 83.03671:641 88.95302:3727 91.05457:3610 93.07041:954 95.04955:3787 100.0359:593 101.02997:606 105.04529:984 105.07…	11298459	11917832	11159552	11953220	13676464	6490130	12936034	12768721	497112	217619	17016142	14560836	716357	978613	1551121	448496	299311	352570	653278	5362338	5924970	10745965	5948458	19708796	19897742	19610040	17938710	18089958	18648294	6224332	4680846	4107755	10002444	18006978	17119338	2545017	6100866	11197591	10870840	10585231	10943203	5834096	11121386	12441408	5253526
Formononetin	MSMS	C16H12O4	267.05893:2475110 268.06228:247476 269.06564:34592	55.05501:1046 57.40156:1097 69.07065:1074 81.07056:1706 95.51855:1028 104.20296:998 110.29324:1023 126.82111:1005 143.21579:1038 171.40971:1124 189.60568:1216 267.05942:6572	13394794	13301999	13894927	13830336	2207922	14202361	4519570	3266235	3917380	7681613	8717475	13426665	1966315	1738577	15772797	15038373	14615766	3660306	3595612	3514923	3330128	3497317	3355114	14166602	13964635	14237872	13821492	14092485	13822267	4954	14941243	14892598	10780818	10393617	14562138	12703572	1881827	12591784	3783598	14038558	13842128	14208967	14003665	13876512	15409029
Gabapentin	in silico MSMS	C9H17NO2	172.13318:1102076 173.13653:185514 174.13989:1635012	51.7149:581 53.00301:1034 53.03939:973 55.0186:726 55.05288:974 55.05514:12876 55.93509:737 56.0585:3538 56.06073:676 57.03419:663 57.07057:751 58.30499:642 65.03922:2125 67.05496:10831 71.93006:16605 72.04517:9753 72.93781:13856 73.0485:5305 79.05474:2243 79.84861:639 80.93199:1160 81.07059:1697 89.07149:716 89.94042:1149 90.94814:6826 91.0547:1364 94.06075:661 94.24855:681 95.08594:977 99.91535…	18846146	19544768	8006300	11143684	19395778	20582366	8670115	18412274	4650767	9465861	21483830	8776510	4544771	3052124	9738219	6918332	11115936	6717622	5341094	11826238	4265388	17039782	12891361	4460683	14508357	8093574	10956260	4254398	5734254	3322895	12367390	10383946	8819822	10577646	2788087	10338836	15946444	9486993	3331052	2277982	1647094	4432059	4344709	8750298	6347470
Galactitol	MSMS	C6H14O6	183.08105:849957 184.0844:119794 185.08776:387195	50.01591:1417 50.88243:767 51.02383:11036 53.03951:27815 55.01868:1473 55.05502:1509 55.52075:893 55.93529:4260 56.9431:12075 57.07045:1154 59.92885:773 59.93109:8918 61.9038:712 66.04269:882 67.05496:1855 72.93788:25666 77.03922:6375 79.05483:735 81.03415:2656 90.94817:8947 91.0546:846 95.0435:1366 95.04964:43300 98.98462:82620 105.034:17809 105.04499:10677 108.95855:1769 113.96391:2480 116.1245…	12026635	13584737	11528931	12334088	13058281	12865495	11570931	13508101	3256033	1064253	4583322	2052051	4997152	8065289	4060561	2525696	3143844	5276234	10887398	6698614	7236970	14745487	9619266	7477592	12199614	6630252	1923513	3069586	1327714	1342441	4160162	1433748	2052580	2197067	2223426	14885096	7313472	7862163	15885205	9716591	15314928	1792966	711020	3801148	8912261
Gamma Hydroxybutyric Acid	MSMS	C4H7O3	102.03424:1266510 103.03759:20606 104.04095:28948	52.29128:1550 56.9657:16289 58.06599:21270 60.95835:2174 61.41439:1395 67.51072:1787 67.60651:1392 69.33533:1609 72.0815:2168 74.09698:2390 80.24274:1489 83.04482:1417 97.00819:3898 102.1281:5978	3971672	6042444	6613671	7609466	2941522	3654564	4944169	8983647	1847256	6360890	5490515	3578772	2810486	7878447	1476863	2554036	2788414	1622226	1601124	4147936	3268153	6326448	2247258	2829499	4093226	5427441	1314834	968427648	3562868	7541456	1716867	1339250	2436414	2831326	3171745	1028160448	587743	2046106	4954420	1323500	6137693	4753531	5142269	7364549	5044880
gamma-Glutamylglutamic acid	MSMS	C10H16N2O7	277.1041:10600 278.10745:0 279.11081:16496	53.00297:1172 55.01871:1213 57.07074:42008 67.05475:1137 69.2418:838 81.07034:858 91.05462:2601 93.07042:997 95.04974:1308 105.07025:1141 119.08576:952 123.04432:2047 131.08513:1574 134.52705:866 152.44299:823 163.07462:1572 179.10597:5046 221.4377:1016 235.16917:14635 277.17947:8779	24683	4735	17185	13277	4389	14606	4678	4168	33718	3351	14833	92164	7381	7351	66779	4128	35522	29033	40699	78803	28827	9355	114416	8797	64328	2924	72023	6305	4521	7745	22933	6832	8901	11315	245705	5117	18537	13688	2945	16192	61032	51587	85440	3361	75606
Gancaonin V	MSMS	C17H20N4S	313.14365:722422 314.147:181148 315.15036:57151	54.21967:683 55.05494:1282 55.6053:805 57.03438:2447 57.07074:7735 65.03929:4042 67.05493:3346 69.07058:1642 71.0862:2697 75.77348:827 77.69027:901 81.07042:1565 91.05479:81798 95.08588:2277 121.02853:3135 149.02327:13467 171.22449:887 207.16994:976 209.27554:1138 295.19193:1074 301.49411:1280 313.23495:7197 313.27139:1884	8784527	8629192	7760421	4667509	8629553	8748245	8028176	8674519	5693965	9555251	9456837	9194178	4627530	4678933	4247287	4515568	8351714	8463869	4552422	4904860	8258108	4578130	8334452	8368054	5098240	5236880	8209738	4633841	4827570	4841944	8128972	8521321	8239846	7722810	4023840	8261364	4375262	1204857	3712690	7840369	4025730	8417087	8306502	8520320	4023675
Garcinia lactone dibutyl ester	MSMS	C18H22O4	303.14398:1673817 304.14733:343682 305.15069:25050	53.26286:684 53.99302:921 55.01877:84975 55.05506:673 65.97667:808 69.07031:1140 88.14752:838 99.04454:111088 114.23199:1015	14065559	14050855	14226573	13667325	14868067	14791525	14521995	1541101	2717	4780	2029	46111016	46300548	45534312	3154	2648	2732	39251	18778612	19832336	31116536	31370610	31564490	39339464	38953512	39055444	5803	955222	2199	8690	2589	3232	3820	5733	3058	38488444	38218704	38236300	36391404	36192332	35975644	2941	240704	3217	30613604
Geranyl acetate	MSMS	C12H22O2	197.15361:334129 198.15696:54549 199.16032:1504090	50.01569:3223 51.02375:23464 51.56929:2641 53.03703:6934 53.03948:84593 55.01868:6835 56.68572:2765 62.90091:2905 65.03938:48858 77.03918:13467 79.71465:3972 80.03777:3178 81.03411:8791 91.05471:122097 95.04963:124947 95.38416:3066 105.03394:69376 105.04475:30255 109.06477:9720 112.80767:3629 119.04948:25242 119.06047:10895 138.66434:3292 197.09528:5468	166769	4837342	140446	4066854	158181	115662	3229979	102950	80438	171769	1518277	1759747	75822	200230	477654	165695	248318	114463	110234	175645	108591	1028034	1236141	111245	159899	634134	62060	2328523	60273	78381	43341	250280	2017640	1738398	84069	106911	79332	1284687	1712679	109298	184116	108341	3670154	790698	210813
Gingerenone B	MSMS	C16H24N3O8	387.18054:2930136 388.18389:788245 389.18725:90525	53.03947:1287 55.0187:966 69.03415:3296 71.09023:910 74.08452:927 74.14667:1051 79.05503:8309 82.93861:961 85.02921:1269 90.26772:1046 91.05457:2239 93.07051:6422 94.71245:979 95.04968:2225 97.1375:1067 103.05481:4425 103.56994:1000 105.07035:228248 117.93369:1047 119.04948:3720 121.06528:4005 198.51514:1042 273.58743:1169 337.99954:1054 371.64761:1042	22816572	22563202	21785004	21693462	23795680	23214684	23308014	23217016	427429	21506	195.279	1165242	1992	1363804	8434	195.279	1146986	6379	19319	6714	2267	2503	3575	2900	5127	2515	195.279	195.279	195.279	195.279	1622438	195.279	1178467	195.279	93938	2543	2870	2449	5198	2589	1665234	245085	285934	195.279	2072
Gingerol	in silico MSMS	C17H26O4	295.1904:1319401 296.19375:259476 297.19711:56871	50.73314:694 51.6102:809 55.01861:1872 55.055:3802 57.07076:56321 67.05492:2884 69.07052:2187 79.05499:1909 81.07063:4431 83.08599:1234 91.05488:4136 93.07034:2338 95.08585:2497 105.07033:2601 107.08585:1307 109.06499:1497 109.10155:975 119.08588:1845 121.1009:1487 133.1013:2710 137.05931:2845 163.1386:1042 221.11774:1545 239.12746:1064 277.17929:1318 295.18848:2307	13070950	12947243	22829294	22738826	9034143	14433524	23262188	21237488	721284	270010	319760	339294	614039	159353	370031	541782	368746	285997	373608	395546	288356	417699	386778	632016	18999740	15047594	14743018	12266142	13765034	12161211	20949120	12543698	13283010	20939660	20999568	6568897	8474681	19651576	13443905	12379570	14047326	12433655	13718342	13125205	5929256
Ginsenoyne C	MSMS	C15H22N2O3	277.18011:3342709 278.18346:621457 279.18682:443459	57.07082:140001 63.63532:2161 74.92731:2269 76.23813:2587 80.22869:2979 84.8308:2601 91.05486:3381 95.05:4107 97.54588:2642 100.97968:2316 105.07018:3357 105.14383:2509 119.08507:2834 123.04418:5675 131.08609:3814 133.10109:2563 137.06035:6319 137.89465:2471 161.09679:4765 163.07576:3194 176.38898:2912 179.10695:16185 188.95392:3034 217.15891:3802 223.72473:2763 235.16953:47013 277.17999:23065	19307210	19023744	17499970	17336368	35071756	48977308	24267828	32194666	887613	1563195	1417617	640324	968055	893105	745198	911335	1226924	1557944	1759286	1341627	900150	1198324	5838942	61911540	5158353	11308129	6343830	6421288	6881381	4789617	7127212	3180302	3359406	36236508	7969578	13655745	11503325	39921364	22654980	12469185	2053785	7489436	6613904	1918753	54035140
Ginsenoyne K	MSMS	C15H22N2O3	277.17987:1580029 278.18322:289388 279.18658:394267	52.05693:3858 56.96532:3610 57.06823:5597 57.0707:64093 68.68324:3732 106.14619:4190 124.2161:3989 126.74331:3883 179.10632:4901 235.16939:26343 265.86322:4386 277.17905:8124	8448628	13824522	9737761	2857876	4143847	2789422	2835832	4441411	9300346	2015054	11332222	14389736	9624158	2109253	8315244	5427102	4968930	6110678	2480699	8956574	10140749	3326394	10293468	5756374	4147272	5765766	3523661	14446796	3584311	7978473	7059052	6444806	4561542	8464101	5620142	3103209	3174989	4675914	7180472	4381996	4010306	5565844	6960450	5011270	2364338
Glucosamine 6-phosphate	MSMS	C6H14NO8P	260.05338:5700381 261.05673:458257 262.06009:521490	50.09884:1050 50.63583:1490 64.7547:1305 84.29671:1263 91.41796:1481 101.48181:1676 111.43469:1441 114.06673:8253 188.98914:1594	49872860	50435448	50311456	50829100	50468788	50804648	50797416	50964116	55962456	54166132	54660488	68790432	69651808	66938136	43214592	43233992	43517020	56202008	55655488	56888868	25756860	55461744	56185168	53835172	54095280	53917120	63032792	61402444	61522068	65348992	64703128	64261620	49810384	49037852	49757284	47849944	48438524	47750528	42521708	42536812	41744988	46752580	47510964	47430632	49404756
Glucosan	MSMS	C6H10O5	163.06007:27629332 164.06342:1640068 165.06678:299909	53.03939:22608 55.01866:59893 57.03433:50548 58.06598:62099 59.06932:41240 59.07359:17728 60.08152:34643 61.02933:158646 61.08496:25982 69.03414:43459 69.22501:11030 71.01358:12707 73.02914:41687 81.20899:13669 84.03035:11897 85.02908:66811 86.03255:14020 97.02877:20826 103.09566:15187 104.04211:18924 163.11584:16362	201718144	203822816	185152432	184562768	181850416	184235280	173634880	175850736	79475760	80123824	78236464	197498064	202723584	205320704	130327152	136407392	129242496	233888336	228200960	219297088	187936528	186423008	184305280	204273488	204281856	205497264	129728176	131058576	129667872	233761664	233927904	244628464	197665472	194922864	195002640	194878528	191972080	195192736	307561536	304665408	308871872	135925808	136438176	135508784	87041200
Glycyl-glycine	MSMS	C4H8N2O3	131.0493:1685690 132.05265:244682 133.05601:228073	50.01424:813 50.01603:8693 51.02387:43319 52.89845:818 53.00316:1077 53.03954:17962 55.01889:1071 55.93529:42878 56.9356:2077 56.9656:1469 57.9357:74827 66.74976:924 67.05482:846 67.93557:1588 69.24301:876 71.93005:2889 71.9409:1207 72.9379:99852 73.93821:4534 74.93845:5966 75.02351:1237 75.49654:2345 77.03928:14223 79.86746:942 81.03414:1504 84.50168:2104 84.94621:1081 87.00453:1967 90.94827:475…	14659924	14824380	14716853	15300350	14636443	14774934	14873249	14850688	16591610	16721063	16788078	13624509	13477339	13749790	10511120	11121283	11026592	14106382	14133927	14052392	18821926	18561326	18822366	9268070	17421746	17943618	14896161	14896300	14953477	13610074	13844620	13924899	37811572	38321332	37685260	14282983	14156145	14192054	13147402	12738177	12999446	14918294	14920969	15034388	11771728
Glycylproline	MSMS	C7H12N2O3	173.08107:933758 174.08442:77478 175.08778:120506	50.33456:577 52.92441:720 53.00302:954 53.0394:1028 55.01865:772 55.05515:21348 55.93522:2304 57.62954:663 59.04994:3923 59.51382:569 59.80005:676 62.77163:807 67.93535:978 71.93008:981 72.11527:657 72.93045:1089 72.93784:2059 77.20029:715 81.79788:729 83.04976:2347 86.1314:655 89.94009:805 90.8766:810 90.90382:5799 90.94805:995 91.05474:731 97.00804:3736 99.00388:773 101.06061:707 115.05426:857 …	10971267	7494067	13448215	11246205	12394525	12838213	13063752	13850217	12723531	13604395	2068473	12657771	12349678	991622	11263986	4272118	11591970	7477111	11416441	11385619	1207761	11858590	10475578	7053338	12494204	11696806	11748252	12318658	6103688	6244804	11914599	12291820	1540781	12641185	11813903	11735394	12082215	6091500	6385242	6021716	7081104	12424663	6488132	12021906	12281989
Halaminol A;(+)-Halaminol A	MSMS	C14H31NO	228.23227:886425 229.23562:134858 230.23898:29070	55.05511:4578 55.93524:7469 56.05848:959 56.94306:1354 57.07066:3608 61.52396:708 67.0548:2194 70.06554:728 72.04498:2076 72.93789:5447 79.05489:981 81.07075:1729 82.47585:798 88.07594:927 90.94815:3702 95.08588:951 102.09093:1024 108.82928:806 108.95858:2181 131.97383:1156 228.23172:9200	8459762	7446438	3696243	8722161	7364770	7323706	7567235	7144332	8478481	3138358	10587806	10800993	9425790	9746963	15363538	2039389	22493876	8285706	9340823	8731952	7970260	8563517	10757683	10315333	10579061	11685686	903947	3264437	21907114	2167532	5065652	4467218	1069893	1191940	18858776	10417401	11048872	11665587	10911175	10137023	10994585	3942622	14929789	1150470	11727079
Harmol	MSMS	C7H10N4O3	199.08667:117679 200.09002:22459 201.09338:30717	53.03954:1150 53.04269:962 55.05515:27414 72.04509:7883 74.09714:22419 78.99776:1314 83.08602:3601 86.02654:974 95.27475:925 97.00803:11726 100.07613:2316 133.18303:988 154.06531:1480 199.18071:1770	1265814	887009	1047080	56308	959847	907697	761924	800895	203701	276993	201377	92097	395525	777122	1521436	1417647	80828	92305	775349	104268	235951	119215	51657	46805	68051	73188	50135	90414	100686	134755	63801	52874	603622	71022	1560299	197373	87817	455688	118410	53156	41261	1312488	2750390	1529922	61540
Hexahydrohippuric Acid	MSMS	C9H15NO3	186.11246:2732492 187.11581:946671 188.11917:304848	53.00321:1064 53.03955:1167 53.20394:629 55.0188:733 55.05501:1109 56.05042:4279 56.94308:817 56.9636:498 56.96573:5497 57.03439:1771 57.0707:2084 57.31281:735 58.06583:631 59.36764:568 59.94125:1748 63.12903:686 65.03937:3281 66.19728:797 67.05173:1253 67.05508:14857 68.05026:1675 69.03431:1231 70.06584:2320 71.0499:837 72.04517:1131 72.93789:1046 74.06081:872 75.48051:704 79.05461:850 80.05025:…	20668470	20684260	21186074	21038522	21742698	21415036	21433360	21798280	16630025	16499390	16896534	28971954	30550370	29192228	8412392	7950510	7739736	10731576	10580207	10998892	9953749	10506452	10496376	12653358	12436405	12524629	17543018	18042414	17727210	10845448	10995491	10975211	18723458	18800514	19010042	16702162	16698619	17026034	9792972	9462589	9735434	7191798	7148304	6978364	41393792
Hippuric acid	MSMS	C9H9NO3	180.0654:26418714 181.06875:2887901 182.07211:177682	50.01592:46828 50.84615:15654 51.0216:22365 51.02385:386570 53.03951:861616 54.87298:16656 55.01872:34874 65.74053:17169 67.0551:22221 72.27752:15455 77.03928:261835 81.03416:74156 95.04966:1380885 105.03406:597031 105.04498:391557 111.20143:17729	392021312	395912320	393068480	402799680	384630976	387271424	387534656	388101120	349597728	349114592	348319232	345776736	347997824	358626848	355283744	360181440	356869088	354363232	353502304	354102528	348736352	348921504	347744160	349715392	347670144	350400928	440369280	439907872	438336416	304429056	304838592	305762016	876817664	872399168	295193664	300919840	301666304	302090944	317886944	319111904	318502336	330376320	328871840	230652464	352724256
Histidinyl-Valine	MSMS	C11H18N4O3	255.15924:1584313 256.16259:226280 257.16595:95635	51.63705:713 53.00307:1063 53.03948:1019 55.05519:6725 57.0682:1322 57.07079:19365 59.04998:4502 67.05511:8171 69.03444:1094 69.07056:2586 79.05494:4930 81.07053:4980 83.0497:1673 83.08609:1386 83.75978:829 91.05481:4945 93.07033:4576 95.08607:4009 105.04493:876 105.07038:2479 106.10484:837 107.08599:6910 109.1015:9673 111.08092:5381 119.08585:2538 121.1009:1816 123.11709:1456 123.94057:907 125.0…	16705781	16378972	17385018	16485219	17088642	16842674	17021234	17111372	16335562	16090959	15514930	15383039	15375356	15807644	15713513	16143410	16203824	15562003	16224671	15418125	15339103	15796733	15987771	15548742	15781057	15428059	15853798	15637362	16537238	16101762	15554320	15974157	16435625	10017349	9308171	15942352	15945828	15466869	15873420	15785672	15907669	16119650	15900146	16029645	15690732
Homo-L-arginine	MSMS	C7H16N4O2	189.15953:3580598 190.16288:401611 191.16624:0	53.00297:1097 55.05503:3150 55.59407:765 56.04781:1222 56.05037:18531 57.07071:1494 58.066:4350 59.07394:1182 60.0816:10426 60.08918:718 64.59548:812 65.0393:2106 67.05502:12883 68.05033:966 69.05802:1963 76.58839:722 82.06586:784 84.0814:71217 84.96278:787 90.01764:1153 91.05492:849 92.05071:815 92.27746:737 114.97121:1313 127.11081:845 130.0864:3018 176.17023:982 188.94115:839 189.15984:1789	31013194	30740724	30685566	30971794	31184444	31794528	31285004	30858974	8175962	8228194	8346016	69229136	70492728	68812192	13243004	12568613	12632451	28049006	44126380	23526412	30400362	29840058	29618768	22889330	22969154	22730024	19404258	10008992	19670680	41892892	42027296	25077776	14923241	14769420	15178750	25885784	25851452	25873982	28361342	28325822	28436226	19214044	19444662	19408014	47193804
Homoarecoline	MSMS	C12H11N	170.11755:1626130 171.1209:464986 172.12426:455228	53.01427:1957 55.01868:2344 55.05513:14247 55.9353:50441 61.50751:2459 65.03941:21887 66.04728:17705 75.31791:2854 90.03743:2368 91.0547:2620 92.04985:8479 93.05783:76254 116.54239:2401 127.37267:3027 128.95062:4545 136.06956:2729 170.09625:7217	3737773	1472618	6087705	19864992	7525138	17251004	21322106	3343048	7949174	835980	2130040	2518207	2386809	3093406	1556251	4402296	3204006	7320199	2107130	2782202	6618245	8458300	4912333	13794113	3543965	12329105	977233	2727743	2911638	1939608	1675656	9620101	1192855	2688763	6064616	1803690	3041468	10197005	4707510	15188264	5963969	2199775	910531	1427938	3181458
Homodihydrocapsaicin	in silico MSMS	C19H31NO3	322.23764:1056634 323.24099:259949 324.24435:56443	55.19014:687 57.0706:1743 64.71684:803 74.09686:845 91.0583:1318 92.67295:818 124.50376:868 127.36809:1012 196.88849:875 198.46454:1034 201.74425:992 261.96387:849 267.00101:1213 299.06146:1074	6908374	13574434	6730179	12082427	13577171	14133556	2087126	13604119	2789418	3420180	2983484	5897471	11333242	6707520	1493301	8043054	4710334	1538691	2313093	13252524	16435506	17227450	17762396	9032447	17981878	2202059	5066042	8586501	8086446	8701094	5810023	4024192	5568141	6424810	1732633	11829161	19849950	8491492	15515497	12440093	12841404	4784508	3200632	9354270	12476669
Hydroxybutyrylcarnitine	in silico MSMS	C11H21NO5	248.14925:8291932 249.1526:989432 250.15596:102539	53.45473:4862 56.10867:4740 56.88665:4690 57.03439:44630 58.06593:13301 59.41261:4975 60.08164:41145 65.95611:5697 69.03417:8613 70.07684:5020 82.19448:4982 84.08152:14540 85.02905:594880 103.03946:30172 129.39851:5837 143.99928:5982 144.10199:7218 148.22665:5290 166.255:5476 189.07608:8365 248.14894:37274	34274584	34116172	33646248	33661304	33886784	34808100	34094832	40602220	46231584	44003892	47690736	43727988	46907016	40189648	22325412	21952918	21948108	41845308	40396752	41297020	34495816	37494564	34047008	49097376	49221388	69594	41171656	40964928	40760384	35725296	36183396	37001036	44093140	52253208	53634096	34469608	33341532	33693544	35224492	31370280	34585024	40947164	35164840	35208384	33084656
Hydroxyvalerylcarnitine	MSMS	C12H25NO5	264.18085:1318972 265.1842:147915 266.18756:59092	50.08466:665 55.01642:839 55.0188:14237 57.02644:764 57.03439:1714 59.05001:12417 60.26667:678 65.8587:774 67.05478:743 68.06257:867 73.02902:5646 82.18941:825 94.0637:1105 96.20506:850 113.06017:5103 148.82552:854 227.02133:1145	3504386	9331322	8254856	106008	9350212	9317016	11202779	17164124	131780	73700	41384	83076	49518	23346782	94351	86795	60332	103572	147475	105636	26573238	153137	97929	23884898	134553	26824210	129405	66555	50054	43859	5275387	5762973	5899170	82152	55041	135536	76826	23250598	26572044	20668110	51310472	47797	6417770	64559	7709336
Hypoxanthine	MSMS	C5H4N4O	137.04596:3784676 138.04931:349987 139.05267:283592	51.02373:2830 53.03936:3852 53.68035:2374 53.99809:2641 55.03:68513 55.05521:3486 65.01418:9790 65.03944:9389 66.04277:3274 67.0299:20362 67.05486:2414 71.12632:2641 77.01383:2746 79.05518:2516 81.07091:3305 82.04076:13094 85.31635:2670 91.055:5024 92.02492:11208 92.0583:4755 94.04099:6041 110.03526:17779 116.10767:2869 119.03574:14665 135.02846:2873 137.04611:29574	3600672	3569604	3622306	3302154	4214840	15783585	16073928	16297184	145167	193710	107093	20502650	20412286	18860314	51754728	50860504	51867840	47914948	47609300	47545352	28787788	849002	351542	2321075	2979422	2044318	2484121	4057764	2631179	2712179	2584056	2511557	218709	129734	135283	3544600	562793	1450197	1898995	2666728	1795724	117499	261268	253648	2247997
Indole	MSMS	C8H7N	118.06529:3930618 119.06864:770864 120.072:62367	50.01603:41926 51.02385:203368 51.86977:1653 53.00299:2106 53.03953:16559 58.06598:30727 59.07373:2074 60.45692:1911 65.00319:3269 77.03934:18055 89.0228:1864 95.04963:32434 105.04516:7633 118.06558:6354 118.08614:2402	67054980	68285232	76839512	80320160	80035760	83320064	84938608	88655712	80335768	59901716	159344768	52043456	157145408	162945088	164825584	164333136	51181916	157498128	3316716	162997008	77850680	158181840	157420336	159828944	158990256	157291424	195655424	61957508	195186096	48537020	138612896	139916848	370695040	369251552	368944384	79148448	74956496	141670048	145549520	146091696	146641056	150936176	148790800	151338736	160947344
Indole-3-carboxilic acid-O-sulphate	MSMS	C9H7NO5S	242.01166:1613376 243.01501:151874 244.01837:91765	51.15219:1003 58.29022:943 58.91488:1128 69.38567:1216 89.03912:10276 96.03706:1053 104.04981:6465 105.05775:11334 109.09249:1111 110.54311:1070 115.04176:1238 116.04968:70052 133.05217:30660 134.06033:4520 144.03281:1626 144.04431:31529 161.04701:26176 162.05487:86053 242.01097:3551	18764044	24039276	19472088	18864656	19297046	18878110	18909264	19396000	5834074	8597863	6402741	25009954	25664716	20107864	24018166	28708264	22961678	21146746	22583494	21305554	19829438	19161924	19502502	22228840	22937884	23549506	23158230	22967066	16748851	17370326	17762458	10810910	10623986	3440691	9614796	20582780	26574848	14343700	16582927	16629078	21476598	329830	15322723	15476393	22415806
Indoleacetic acid	MSMS	C10H9NO2	174.05513:430798 175.05848:0 176.06184:71593	51.02371:878 51.32383:613 51.67462:695 53.03948:3252 54.82208:682 55.05498:708 55.65725:705 57.17913:754 62.24102:829 65.03939:3965 66.04694:1267 67.63732:793 72.93777:995 79.05487:2535 91.05479:24674 93.05803:1258 95.04967:3238 97.00826:1053 103.05471:2994 105.04484:1088 105.07082:999 105.44663:1008 106.06562:7015 115.05458:3664 117.05757:16802 117.07004:1723 118.06518:4283 128.0497:1148 130.065…	1705737	1747144	1628068	1683135	1830074	1836597	1966014	1773524	1005074	1057641	1087832	2039768	1307356	2012333	1122864	1103449	1217646	1702747	1658917	1648985	2368855	2490324	2417584	1422854	1384371	1518244	2082306	2099192	2077373	1353427	1165042	1235303	2004380	1905393	1906573	1408259	1371731	1586097	1955632	1941599	1942802	1052132	892984	1013298	2418524
Ipomeatetrahydrofuran	in silico MSMS	C15H28O3	257.21115:2599271 258.2145:488633 259.21786:135637	53.00304:1608 55.05518:6471 57.03443:14202 57.07079:22526 67.05493:5541 69.07053:1759 71.08632:3565 77.21652:1294 80.00877:1314 81.07053:3121 91.05428:1554 91.41503:1191 91.91521:1271 93.5272:1481 95.086:3499 104.5143:1162 110.85265:1472 233.95242:1407 257.21185:5350	4912582	9401305	2200528	5083291	4761026	29601552	30499052	30961154	199291	222405	8718646	116748	976570	141043	155199	3414125	201251	137599	147585	150010	122455	182793	951060	336825	158535	18266930	11110894	23210374	242382	2076099	2056470	14412245	1802783	2274120	2169355	7671232	219371	4474352	126077	8227163	5338901	5024630	5335675	216972	1000510
Isobornyl propionate	MSMS	C8H18N2O2	175.1483:2230543 176.15165:287990 177.15501:140174	53.00312:774 53.03944:3519 55.05503:2321 58.43903:907 59.99108:1392 60.06432:801 63.99739:795 65.03934:3083 67.05503:3942 71.20732:829 72.08718:864 72.83541:881 72.99882:2888 78.04704:1291 79.05496:7737 81.07059:2750 86.00639:3030 88.02237:5550 88.02695:1309 91.05484:21068 92.05815:2600 92.90041:1629 93.07061:1865 95.04975:4228 103.05473:2570 105.0454:1747 105.07048:6603 110.04312:1031 115.05473:…	33051014	33457952	34078920	34045484	35702624	35875700	34490592	35340644	32946760	30461340	18204956	31112568	17320968	33154176	17940630	31710592	16489278	17569174	18412554	17231442	18217832	31020350	32607012	32080326	17764408	33735792	21065594	19180050	18820730	34850556	18566996	13309872	32192666	17361832	34490712	31226068	31476696	32558118	17393008	16451196	31748380	20110914	18513560	33383606	31869826
Isobutyryl-L-carnitine	MSMS	C11H21NO4	232.15456:2409833 233.15791:325904 234.16127:59825	53.42661:1023 56.59233:942 57.03441:10295 58.06606:2810 60.08171:5965 62.91725:1140 84.08133:4092 85.02906:122297 93.41145:1069 111.24232:1315 111.59974:1200 111.81019:1291 118.0652:1745 132.08058:1213 137.35262:1580 173.0229:1355 174.12839:2137 192.4778:1430 232.15514:3874	45301304	13851356	45378028	44608092	46817536	46987296	46207804	14960377	7794272	49796024	15159083	15982203	45555560	16121190	10830618	10474493	37461008	14276847	14283419	46270288	33498520	13248867	13135430	52485244	50517532	52849784	8883954	22924236	37307740	8280341	21954676	21462940	42645944	42487676	19940532	41883016	17760636	23953642	19965010	40242820	40616712	38709452	19185808	22798142	22604712
Isobutyrylglycine	MSMS	C6H11NO3	146.08124:617426 147.08459:87415 148.08795:14535596	53.93946:3503 58.06605:94206 59.07373:5595 60.08162:46742 62.63611:3724 67.04263:4638 78.49232:4079 87.04477:42639 100.0759:10212 125.9842:4435 146.11783:17340	3778546	39650	97133	39777	64617	12641	25636	3964988	3739598	3526274	2356452	4620232	5202166	4639324	44424	3722018	3276362	32737	302961	95151	125714	112502	53436	1560935	73936	374211	30684	96418	4118679	36160	21608	43981	119335	233485	76269	4175533	96767	97996	79979	74184	30527	2586913	3208668	48469	4481604
Isogingerenone B	in silico MSMS	C22H26O6	409.16205:3774794 410.1654:903904 411.16876:114473	62.71713:905 67.44631:953 68.94912:955 89.35046:1089 90.92605:925 92.15879:1075 102.5999:1032 103.61735:1009 304.58359:1196 372.82584:1196 373.76312:1114 409.16193:62393	31970404	32226876	32891160	32892820	33389700	33369196	34435336	33963140	239.129	239.129	2719	70930	4573	59657	23561	2830	2835	3309	177845	27363	227788	283735	322562	239.129	63250	39380	240129	162582	329372	178827	214185	239.129	54061	3375	239.129	239.129	239.129	4025	139956	210101	183331	535835	503361	367467	4011
Isoketocamphoric acid	MSMS	C12H14O5	239.08887:8336807 240.09222:886546 241.09558:117303	53.9842:4472 57.97499:4530 59.27298:4750 64.65696:5212 79.171:4722 128.99748:5541 154.21375:7422 239.08899:23086	154340560	78817112	2243323	157103920	219829008	138127648	140921120	883534	37266156	133292896	89731368	263071216	259219280	286160032	71285448	142452832	42714012	16948658	21161756	106948928	100786928	51143444	72595168	275956064	295658144	284130368	68348624	69750256	71881704	145614736	66268212	69682472	59075148	37328240	69387408	270502048	2423812	165347824	159455984	134199168	153884272	38189784	144895536	40832504	147565696
Isoleucyl-Tryptophan	MSMS	C17H23N3O3	318.18146:689231 319.18481:109473 320.18817:0	55.4836:851 57.12693:808 58.34216:778 68.50597:834 70.82931:857 71.54137:832 86.0971:12252 87.22991:797 96.05279:797 105.33575:876 115.05492:1115 118.06548:3660 130.06517:1910 132.0808:6171 144.08098:3956 144.2254:943 146.00681:1010 146.06012:15881 158.3036:946 159.09177:4900 160.07689:1022 162.5936:913 170.06029:2535 182.64294:831 188.07019:7582 195.4704:1008 199.1321:904 205.09758:2087 262.1421…	799402	979058	571001	655116	165240	3050488	3853700	754000	45459	55166	18062	73223	49823	57182	39012	27843	27784	56383	95201	56904	84446	108929	50025	98565	378448	542683	548232	29451	19337	718516	633182	524195	511648	30999	20403	738903	569431	6249562	6356771	553792	294279	867211	46542	875879	4297218
Isoleucyl-Tyrosine	MSMS	C15H22N2O4	295.16541:515613 296.16876:86488 297.17212:0	50.12617:667 51.18331:743 52.80872:639 55.05511:947 56.76949:745 57.07098:1049 61.0257:935 75.90127:1071 81.07073:1141 86.09723:1635 91.05482:41445 99.05132:794 103.79649:858 107.04946:2027 109.065:1191 118.0657:1950 119.04934:14495 121.06524:1273 130.72601:974 134.28568:884 135.82199:917 136.07582:24547 276.32401:1001 295.16577:979	2998543	2960478	3088328	3167914	3203827	3224344	3026198	3085216	4027662	3954660	3908792	4225620	13984551	7486532	1422359	1333376	1354749	3193630	3247107	3163462	2811186	2879788	2901219	3412419	3338130	3439371	3515817	2965266	3509201	2453523	3788299	3742428	4526172	4507308	3011322	3452022	3422037	3389568	1838179	3727768	3704108	3555983	3453296	3423542	3018375
Isopentenyladenine-9-N-glucoside	MSMS	C17H25N5O4	364.19678:1159121 365.20013:194526 366.20349:37485	55.0113:907 55.01874:33624 69.0304:841 99.0445:117288 141.78215:1034 230.93405:1142	9249866	9041214	9230860	8262882	9599147	9377666	9348165	9366568	45563	3531	9927	32541532	32472522	110611	3199	4437	31412	14711167	41029	15113387	21463014	21703186	21562538	26545134	26458662	26702378	2831	3006	3158	3183	3057	4037	3962	3684	3357	25433264	25603614	25518810	24867970	24647260	24380332	27978	2924	3206	22666348
Isopropyl beta-D-glucoside	MSMS	C9H18O6	221.11717:1301188 222.12052:241615 223.12388:106017	50.11577:563 53.03943:1376 53.07002:674 54.54838:634 55.01858:2814 55.05507:3260 57.07078:11720 59.04994:890 65.0393:796 67.05492:2766 69.03415:1136 72.38784:681 79.05492:4500 81.03393:2094 81.07051:2563 82.54951:779 82.83208:682 83.04944:1357 91.05475:7680 93.07037:1360 95.04966:9059 96.82189:744 103.05428:1528 105.07018:8866 105.10459:691 107.08627:1009 109.06506:1940 110.91544:786 111.66722:80…	17976076	19200490	20491602	20128152	9685531	41863224	20965038	10836039	445011	398098	494759	282300	217949	756711	366447	388326	168685	480014	4117137	38938564	428590	12593482	31344768	19970826	32726742	21721914	868547	302248	321317	3090466	2178025	2334724	28814054	310427	16164675	37016244	38103624	36009412	58752104	36580656	35589616	1686924	11997373	1670410	47561972
Isopyridoxal	MSMS	C8H9NO3	168.06554:3725801 169.06889:419729 170.07225:752362	51.02379:2096 52.26372:767 53.00315:2203 53.03698:1004 53.03953:19722 53.93996:1520 54.03476:1739 55.93526:1030 56.94299:1305 56.96555:893 63.92939:1542 63.94315:2310 65.03941:15616 65.95883:865 67.05507:29225 67.93567:2324 68.05016:2324 69.03419:1475 72.93791:1646 79.05476:2884 80.94568:4010 81.03412:1829 90.94807:1155 93.05784:4886 94.06566:27746 95.04958:5284 96.04487:14867 106.0656:3870 107.8…	94949632	29450024	29243536	96300856	29915452	100246144	31244700	100128744	31514864	31571798	31708718	32681872	34202616	31102988	37281968	36742408	36499684	31849544	30969978	31203546	32122136	31108986	31347312	392986	98211000	1276081	96939272	28275658	97705016	102180344	101387368	35550692	79358096	16651399	79680648	33062716	90816864	91366080	29892600	72451440	72219040	75053192	51739	76897	28939834
Isovalerylcarnitine	MSMS	C12H23NO4	246.16994:8885197 247.17329:1220834 248.17665:120982	57.03437:51649 57.07079:51757 58.06594:9682 60.08158:36591 61.38375:6117 68.38918:7217 73.85507:7172 84.08124:16790 85.02901:681981 124.72404:6285 187.09633:12317 197.07652:7391 223.03143:7467 246.16989:32717	147493584	281283072	33194822	6477798	114611688	169564048	139648704	104490712	212386912	188338112	16263034	161101376	158500336	10480196	107679920	113809248	88730104	310153184	105651024	134632672	117160008	30151948	160649520	205935472	203430832	40414380	19255036	234695104	74592648	61432312	124334480	15157444	118398088	18022478	22141112	318008928	6501160	25706206	168082960	138950176	160128352	125408872	130071712	123295608	151386016
Juvenile hormone III	in silico MSMS	C16H26O3	267.19547:712327 268.19882:114420 269.20218:93474	50.29935:805 53.03947:941 55.01882:4355 55.05508:5548 57.07071:7643 60.19839:769 67.05495:3817 69.07052:2355 72.76253:737 73.02934:4857 79.05495:2049 81.07055:4532 83.08629:1239 85.89106:844 91.05462:3306 93.07045:1701 95.04956:1145 95.08588:3554 98.98457:1091 101.02377:3075 105.07037:4452 107.08581:1218 108.84734:857 109.06477:944 109.1015:1615 119.08593:7202 122.46561:928 123.08052:1700 123.116…	7777296	7436954	8349808	4376517	7839084	7841796	8246330	609661	215716	164020	174738	335847	740094	327483	34217	870728	483693	228420	658396	284468	131418	344165	6802945	6464200	6255046	6915952	196760	8141578	6998651	6847085	4053792	6391220	6809090	6713646	6989565	7368881	7659310	6141394	6129474	6328220	7672464	189439	6988518	6483904	7508842
L-Aspartic acid	MSMS	C4H7NO4	134.04482:1046136 135.04817:141035 136.05153:472261	52.14494:554 53.17687:688 53.76245:673 55.93521:725 56.96568:2162 57.93569:5765 59.9909:1261 66.34523:705 74.02437:8522 74.93828:1432 79.73093:677 88.03989:2838 92.90068:1312 108.91523:814	7244694	7573556	7544278	7663830	7569494	7454022	7434974	7684978	4438977	4175508	4339112	10630232	11414224	10670664	3768945	3753085	3774537	5067977	8770718	8790479	7597140	7679987	7646854	7372775	7074205	7237572	6211606	6364666	6604739	8066316	8323035	8086106	2661183	2514141	2484615	5965008	5775341	5530374	8248748	8589040	8417242	8260784	7722601	7533988	9640954
L-Carnitine	MSMS	C10H13N2	162.11244:218256720 163.11579:17374904 164.11915:1223204	51.62055:36234 52.57904:42819 55.44874:40601 57.0344:73983 58.06604:445844 58.64007:39707 59.0737:101025 60.08156:218122 66.27634:42777 76.64687:42150 77.02158:45737 85.02897:104683 102.09177:82036 103.03945:74116 142.47911:54931 162.11258:107714	1489669376	1499955072	1452617216	1457227008	1479419008	1492317952	1461465472	1459786240	1233350656	1226679424	1226909440	1849283072	1848371968	1715024512	1086353920	1094354688	1065388224	1676906752	1662641920	1646442496	1326404736	1302995712	1322641536	1694238080	1696448384	1705736320	1358363392	1362306048	1347324160	1512617088	1521205760	1549504256	1181114240	1178462976	1184740352	1649355136	1650443136	1659749888	2021692672	2035124608	2036760576	1533404032	1548625280	1528888448	1567949696
L-Glutamic acid	MSMS	C5H9NO4	148.0603:26028518 149.06365:1521424 150.06701:188873	55.164:12487 56.05036:663130 56.05312:32100 57.03419:11142 69.62054:12488 84.04502:378955 84.40264:12242 86.00018:12047 102.05537:14261 118.58558:12811 132.41986:13246	175147840	177580640	176420208	180213936	180566064	184620928	178627280	179062416	86119456	86192416	86170096	287028512	291099968	272444608	143242544	145084240	142123552	190107776	187261168	186859904	171546640	169385008	168953440	172300704	170693056	172008000	139623552	139813072	139065664	183149504	187133872	185273840	69122552	68565008	68037024	149414256	150466464	150188336	187063712	187324544	187581056	173373920	175297120	173096624	245472288
L-Isoleucine	MSMS	C6H13NO2	132.10197:34763368 133.10532:2703468 134.10868:703251	53.00301:10587 53.03939:5031 55.05507:7101 55.93526:30640 56.05037:65698 57.05823:39668 58.06591:6101 66.81316:3739 69.07063:20706 69.57761:3385 70.06558:3495 72.93781:63826 77.27859:3574 86.09702:49076 90.94818:15268	131161672	130542072	133709432	136413792	131552840	132850416	9858741	135435600	138209024	136007136	137794800	136008128	333869	140904128	120893552	121381880	122327608	149440608	146324880	147127456	146470288	144827104	145710784	131310480	129780192	131015712	118437104	118107504	116455640	1585827	133343648	132533216	139062064	137668240	137428544	117190144	117169272	118742808	126514680	126476496	126658872	137880240	136357568	137663616	137704496
L-Kynurenine	MSMS	C9H19N3O3S	250.1189:650018 251.12225:54890 252.12561:80670	52.1842:628 53.00319:3967 53.03941:2000 55.05491:879 56.01384:2399 69.99306:2064 73.37488:652 79.05488:6493 81.07039:3720 87.01935:915 95.04961:1062 200.72093:830 202.15576:817 250.17778:3019	9557	15828	5755918	6052098	18174	6195819	7132182	7024286	618563	5327468	8226698	125936	53596	49549	5850	26305	12867	140350	84633	2681071	4939018	2640008	4508687	5161671	32052	506445	11528	15813	14031	20989	14922	20248	13991	29611	7467	42904	43855	29837	3007314	2652750	5765022	15765	19005	5717	538164
L-leucyl-L-proline	MSMS	C11H20N2O3	229.15475:3958921 230.1581:1040607 231.16146:573724	52.36997:1026 55.05526:1760 56.62395:1121 57.05804:1665 67.05498:2821 67.51619:1093 68.0495:1101 69.07053:9288 70.06589:55845 86.09701:14788 116.07063:12312	21517504	22357224	21841656	22161950	21844236	22645472	6664344	22217198	430890	527031	30109904	711396	444466	29347148	14432296	205081	406174	445598	809122	624433	885722	670163	546336	281825	25469986	455812	27637884	516145	27005834	31025354	31908424	31507528	28016990	28245106	27543668	22911904	6930976	22923350	6453958	27345688	26952008	447297	6031064	28822570	22152930
L-Phenylalanine	MSMS	C9H11NO2	166.08627:11954093 167.08962:1318644 168.09298:277802	51.02378:51842 53.00299:4883 53.03949:199497 53.62205:4335 54.84029:3919 55.01868:8667 57.66528:4331 61.92735:4315 63.02341:4631 65.03931:31844 66.18597:4580 67.02967:18492 67.0331:4544 69.17877:4348 73.9216:4489 76.70087:4457 77.03914:44955 79.05496:87462 80.05042:7184 81.03421:18231 91.05472:186954 93.0704:38039 94.06547:7377 94.07117:5059 95.04962:304606 102.04662:32993 103.05464:549088 105.04…	50343840	50650024	51397740	53006640	50285860	51455236	51888584	52553904	133102	49595612	50760452	51093852	51773032	374866	341955	40793340	3799478	208098	48110544	355867	127453	52683776	51992140	48104100	47080388	47672176	46879736	45960988	45623292	48335240	48118932	48714024	72635040	72448264	72320448	45529116	45494276	45884284	45874524	45123708	46142392	48975312	48289412	48702952	45493516
L-Pipecolic acid	MSMS	C6H11NO2	130.08643:9102093 131.08978:547350 132.09314:16178978	50.16115:2045 50.21585:2063 55.055:3869 55.73975:2157 56.05031:3559 57.41479:2314 67.04227:8590 68.56178:2821 69.05804:4606 70.06594:3477 70.94267:3148 72.93771:3577 78.99775:3044 82.0658:63478 84.08139:225823 97.00785:8081 130.08623:7627	28399392	28778348	29008250	29595698	29494652	58330060	29645702	29630956	29193404	29375406	29717584	27434706	28428376	27333492	27716996	27498102	26999464	33479024	33170858	33289228	12760478	27318566	27425990	31316610	32079878	31550324	24802424	24504392	25406954	29706302	29939572	29417856	20653176	20698914	20944414	33769180	33457556	33416222	29781250	30215620	30297730	29015166	29444752	29026890	33054282
L-Proline	MSMS	C5H9NO2	116.07082:9938621 117.07417:729952 118.07753:65444080	53.03936:4795 55.49586:2249 58.1174:3153 66.13455:2699 68.05026:24100 70.06582:484633 74.93153:4006 116.07079:6447	69390888	69052640	69097768	70072280	71493248	71822000	71357384	72854320	63364344	63115936	62768696	86106560	87562296	90732992	64805692	64547856	64148000	72624728	70762000	70675176	68173816	69047928	67641128	62486332	61385204	61949768	56512428	55555172	55635328	67163704	67781872	67277592	79813888	79932888	78846576	55752432	55945104	54765744	61950416	61915944	62399960	59157976	59273912	58538404	66409520
L-Tyrosine	MSMS	C9H11NO3	182.08138:13872854 183.08473:1398636 184.08809:4313535	50.01603:4640 51.02392:22880 53.03731:5471 53.03957:79598 54.02231:3551 55.0187:10572 62.81157:3899 65.03948:176491 67.05515:17303 68.02515:10860 68.79823:3832 69.00912:12048 69.03316:3654 71.02483:6214 77.03944:25770 79.0549:17029 80.05017:4896 81.03425:5022 81.0709:5318 91.05484:751598 94.04191:13090 95.04969:276468 97.02728:4965 103.05488:9088 105.04514:35462 107.04959:113091 109.0656:4249 117…	1128276	26752	19115	1829491	1291369	1064086	1607969	55457112	55062	38523	17794	721836	334449	583407	15826	22598	24560	1478906	711141	787174	749948	1193001	739736	10379	873415	625709	34071	481244	511672	13477	31063	607048	1705650	11932	19901	705507	19410	905109	739880	16617	473540	15906	647161	161245	814730
Labienoxime	in silico MSMS	C13H23NO	210.18513:767686 211.18848:230898 212.19184:71465	52.09437:653 53.00286:791 53.03943:1237 55.0187:2813 55.05506:8275 56.05028:4483 57.07066:850 65.03947:1254 67.05501:6048 69.07053:1759 70.06582:804 71.90377:597 72.04543:1026 72.81087:629 73.4525:708 79.05477:3138 81.0704:2376 83.40824:739 83.94061:667 91.0546:815 95.08593:1382 139.86899:712 159.39546:804 185.07028:780 201.29478:722 210.1851:1932	7876645	3879244	8082462	8684873	3867168	8032528	8155416	11720742	691355	3786637	3401289	909974	908327	1086689	920402	2853804	1139987	3306183	3655281	546012	947689	664081	4051419	2747034	6707396	7087476	7021004	3765558	4320612	7347099	7300434	2797121	7795746	4491130	932522	2645385	8047110	916896	7755522	3084312	7333557	3341343	2348740	4407358	7527592
Leukoaminochrome	MSMS	C8H9NO2	150.0551:6969898 151.05845:782830 152.06181:206873	50.01576:1398 51.02377:4826 53.00304:3042 53.03953:13770 55.93506:1880 62.71395:1029 63.92936:1856 65.03941:14904 66.04718:1033 67.05505:15861 72.93762:1781 77.0392:1536 90.90374:13794 93.05774:4432 93.12648:1289 94.06565:9463 95.04966:6001 97.00792:2585 106.06547:1434 150.05481:3695	49924692	50474776	50708384	51880896	51680004	52349668	53151576	53534328	58214552	59082664	58895452	58263776	60626136	56338236	1515445	68584296	66279104	54508980	53837196	53808204	2136128	54999308	56270264	47019452	47318720	46323660	28758666	51461792	51727428	60965704	60583464	60760992	62449428	61537920	62790744	57804944	57799844	57486220	52162272	52268672	52379708	56641572	56296900	55316332	50620256
LysoPC(14:0)	in silico MSMS	C22H46NO7P	468.30862:1075010 469.31197:257824 470.31533:40115	50.46746:933 53.95869:796 57.07072:2585 60.08161:11259 71.08622:2103 85.10219:1203 86.09701:43779 86.10226:2583 86.78893:1185 98.98456:1131 104.10728:5070 107.83839:1126 112.02244:1144 124.99996:21339 139.8813:1046 143.01031:1097 184.07327:150730 264.52344:1274 328.0463:1284 468.31024:10317	11194343	161426	12149977	48080	11759033	34074840	35158480	35043492	9724	23222	31660	13640	17280	8846	15439	43162	9029	79599	31379	119400	16431	41764	76239	10970932	6409260	10843865	5104302	10472536	10537379	12133418	57838	7139138	25061178	28687	4350362	10420156	5270818	10309588	27377428	4573797	9516558	5159042	101284	10012664	10065091
LysoPC(16:0)	in silico MSMS	C24H50NO7P	496.34009:1011143 497.34344:275346 498.3468:47370	51.65318:1072 54.79415:1102 57.07063:2062 60.08165:10894 71.07368:1771 71.0863:2304 86.04313:1287 86.09697:35890 95.08591:1724 104.10737:87020 105.68601:1252 124.99999:13816 159.29623:1173 169.14406:1292 184.07326:95083 302.7829:1346 313.2746:2349 478.32858:3492 479.42001:1182 496.26956:2018 496.33972:33273	4675930	2769953	4295260	2730218	4061377	1831298	4999012	3476803	2768986	1093570	1839653	747549	1373594	615472	2191570	724845	895845	1092777	4052024	5464880	1613554	3545108	4920518	3405424	2021222	25602	1124001	1884220	2137526	2729114	4444790	5004288	2805102	1337717	998457	2604278	816618	1725925	2394067	1783227	2637860	2012040	4380314	1151410	1087611
LysoPC(18:1(11Z))	MSMS	C26H54NO7P	522.35614:1003741 523.35949:276511 524.36285:75952	51.40656:914 60.0816:10309 63.86228:1159 71.07378:1358 77.66491:1068 79.07412:1172 81.07034:1474 86.09707:33887 91.89525:1072 95.08604:1302 104.10743:93464 112.46454:1225 124.99987:11190 147.02191:1238 153.38371:1340 184.07332:106448 211.57153:1338 281.36258:1280 339.28699:1632 349.91397:1446 352.24719:1225 404.40543:1265 412.75455:1292 442.06189:1427 504.34396:4886 522.35614:37649	2230697	3660422	2598016	6901162	6552916	4939045	5115380	3443216	2628780	8289418	9203636	1928631	1915302	4471489	2359389	1347511	2932599	5027404	7242644	10606947	4502742	5016226	2326158	3746383	837578	1489520	3236861	7414363	2351689	5687465	1142515	3060722	9061164	3118259	5145346	14898376	2491880	2301666	3201804	5873105	2691074	2437266	2779508	6013852	4216402
LysoPC(18:2(9Z,12Z))	MSMS	C26H52NO7P	520.34082:861605 521.34417:251896 522.34753:25267	52.58995:927 57.06868:1354 57.07081:14478 60.0817:8300 71.07357:1097 71.08619:5474 74.09713:2097 83.08616:1225 85.10159:3668 86.09715:34562 98.72135:1126 104.10754:4104 107.04967:2620 121.06531:1554 125.00023:14064 135.04427:6291 149.05952:9863 160.89816:1455 177.05466:44706 184.07344:180616 191.10661:1854 205.12148:1772 213.07602:2472 233.11726:4026 344.83701:1251 380.59851:1532 502.33145:2103 5…	11577888	11998169	6319024	6913818	160918	5613460	16569480	10690830	3249766	2145666	850994	6193872	4141239	3143346	1426494	6236682	8879714	3082071	4075204	854157	9920884	1682232	2039398	2612682	6282814	2415874	1014496	1619777	1180575	1792225	1447859	16062	54640	4324805	1381167	2198948	2929270	6086621	2676254	3746948	56431	1216559	7905724	6078212	4941172
lysoPC(6:0)	MSMS	C14H23N6O3S	356.18332:1799296 357.18667:253314 358.19003:46232	56.07069:965 56.43012:869 57.03435:2552 60.0787:1081 60.08168:18341 71.07381:4615 71.08632:12007 76.97034:937 86.09705:50781 98.00999:1167 98.98464:3387 99.08115:6657 104.10745:52611 114.09192:1131 117.0911:1235 124.99998:30359 131.92998:1147 142.25604:1016 173.11717:4247 180.40674:1103 184.07336:40671 198.25742:1106 237.95201:1035 311.07513:1124 329.23514:1135 338.17209:2427 356.18326:7764	6590338	6889074	13556198	6615732	6987688	7563952	2060958	7112278	6412252	6150314	6334574	7920788	7973064	8282614	7109472	7556645	7252412	10856880	10626520	10230801	8242862	8626829	8875342	8565392	8538285	8768698	7587365	7651502	4912654	10535391	10085132	9262975	3544213	3235120	6643921	8219604	8110482	864407	9299267	8603292	8453032	9249116	5887918	9257334	7467182
LysoPE(0:0/15:0)	MSMS	C20H42NO7P	440.27747:618628 441.28082:241876 442.28418:36057	57.07067:2317 60.08165:5176 60.79263:997 62.72308:1106 71.08611:1378 71.86097:972 86.09703:20141 96.54665:1088 104.10736:33307 124.99991:9313 132.52686:1128 184.07317:34147 199.43864:962 221.87721:1122 257.21124:1638 262.19351:1096 277.8465:1046 347.90744:1207 390.40945:1251 422.26645:2582 440.27664:9114	2309256	2377006	21946	4859656	4809052	2365854	38014	69546	1760399	1696756	952475	5589823	972766	3116882	4040674	1321596	2261196	10283806	3989261	3879995	2253532	2390586	7502	111414	2652992	15831	7800755	2312590	2195076	4781	3134236	1589551	444955	934510	608555	7834160	25262	10760	7304	1189301	8021360	2255056	6786	2302406	4299
LysoPE(16:0/0:0)	MSMS	C21H44NO7P	454.29343:1299813 455.29678:345887 456.30014:57267	51.54031:893 55.06735:961 55.15541:912 57.03433:1826 57.07076:11814 62.06089:6000 67.05488:1889 71.08639:8257 81.07038:2125 83.08614:3239 85.10178:4870 95.08589:3810 97.10161:1627 98.98495:1649 109.10111:1663 116.91919:1095 123.11634:1038 128.50893:1320 154.51198:1096 155.01097:1108 181.79559:1221 194.10802:1360 282.27896:4128 313.27356:19464 352.66394:1227 393.24228:1299 413.26636:2781 436.28052…	19359632	11770337	2244923	22340966	12356226	20888312	2697912	21065664	10872	4968	15933	8400	8033	5569	3724	18823	4778	10362129	20186	5599	2183444	475579	12001850	9533021	2798408	7680014	4108374	13373275	2838509	11101507	15713273	16661835	3990514	669196	2368954	12864811	1755735	26115706	15433753	12675029	13788395	2707224	1777307	25825384	7711998
LysoPE(16:1(9Z)/0:0)	MSMS	C21H44NO7P	452.27777:647094 453.28112:157041 454.28448:23586	53.77045:942 55.05518:2158 57.03417:943 57.58221:889 62.06081:3314 65.49882:950 67.05503:1633 69.07062:3340 74.0859:988 81.0704:2938 83.08599:3316 95.08598:2287 97.10156:2542 98.98463:1739 109.1017:1715 121.10124:2125 127.41245:1122 135.05493:916 135.11699:1216 149.42137:1009 225.81454:1046 272.80588:1335 280.26367:2843 311.25751:11060 434.26758:1485 438.46106:1166 452.27774:2903	5935839	5932620	6122364	6137344	6161270	2671704	2737879	6303110	7062	35229	3887	7223	19080	4187	7962	6938	7109	22168	5061	12017	7555	3626	3725	750354	908405	6994670	4226	9605903	5696297	6370608	1989784	3722066	13115471	6708312	6949738	5848154	5691092	1077051	922410	6042986	6189352	6200407	6338296	6384704	1896827
LysoPE(18:1(11Z)/0:0)	MSMS	C23H48NO7P	480.30917:2765860 481.31252:791094 482.31588:120920	50.89029:1010 55.05518:8743 57.03445:7982 57.07086:8885 67.05498:7903 69.07072:20276 71.0863:5170 74.09701:1396 74.11343:1097 79.05481:2416 81.07066:10329 83.08627:15958 85.10188:2831 93.07079:5631 95.08614:11768 97.06535:2424 97.10169:10704 98.98504:1107 99.08081:1412 107.08586:4693 109.10166:5727 111.08096:1649 111.11736:3368 121.10139:5225 123.11727:2050 135.117:4779 149.13304:1299 159.54504:1…	405801	341749	329675	509400	33682	520073	22613840	285954	2919	2806	3113	7408	5787	3993	264127	291127	229676	3383	3822	3805	3855	51910	255.804	13677991	10036024	17388	3278	189488	5882	1216985	773814	784047	2913	207155	147620	4055	678845	14392243	2985	56656352	4424	1337714	1495825	548003	98239
LysoPE(18:2(9Z,12Z)/0:0)	MSMS	C23H46NO7P	478.29367:3095865 479.29702:796515 480.30038:108208	50.0578:1306 55.05512:19569 57.03434:17369 57.07085:3211 60.21442:1202 67.05502:32594 69.07062:29215 71.04982:2220 71.08616:1633 73.32775:1251 79.05482:7555 81.07055:39727 83.04954:1530 83.08625:19890 85.06535:2306 88.24711:1292 91.05465:5726 93.07045:8883 95.08601:32730 97.0652:3091 97.10158:5993 98.98438:1636 105.07015:5047 107.08576:5788 109.10165:13596 116.22582:1498 119.08559:2701 121.10118:…	27218716	27798158	99523	13639	287890	11918	31490798	48223	6689218	17253316	2792340	20685516	20429788	28266906	1270740	201753	191034	40255320	20235850	10514954	10404037	45951972	21081818	3579717	19781	4466000	43150	78470	20674	91342	61205	422612	17372	27046990	39803	96559	24606	39753	33260	33170	25187824	25937	92527	389858	188390
m-Chlorohippuric acid	MSMS	C9H8ClNO3	212.00764:4910174 213.01099:142591 214.01435:151678	55.0186:4726 56.64811:1499 56.96566:74563 59.04997:2068 59.81977:1310 68.99789:19702 71.9523:1598 74.97593:4592 83.00771:7584 84.01548:3384 85.02898:1939 92.01265:2263 98.01285:5528 101.99713:3658 111.00187:16852 111.00706:2424 120.00772:3360 141.39684:1549 148.32738:1638 155.96931:1739 177.00772:3971	43917500	43433588	26511330	46293400	42795268	44484624	359696	45230660	24458620	80852	22869594	659578	656915	583669	29322348	29680004	151780	28869008	44247368	45982164	420203	43197112	43296960	18722362	40601708	39384548	35979392	35505160	18256332	10496366	34201876	49789588	16594878	16447193	16522425	144306	35867672	36386640	640416	47737628	48344324	51603632	588132	49258912	22838062
Maltotetraose	MSMS	C24H42O21	667.22992:8840826 668.23327:2714357 669.23663:853872	59.89608:5465 60.26843:4896 61.02925:38698 65.08109:6369 73.02924:22514 73.4903:6709 76.41325:7525 85.02909:262778 91.03959:232420 97.02897:89132 99.04469:8344 103.03963:15878 109.0289:12749 115.03957:9113 117.05511:11621 127.03924:192380 135.94672:5992 138.11137:6864 144.82559:6194 145.04968:383179 163.06017:525718 315.26361:7652 325.11328:138369 325.15115:10312 343.12424:18037 487.16684:18742	54569424	52779880	45172424	45336712	40598748	41324452	38234000	38835580	6160628	5839379	5919826	41209920	42586296	41814072	19360834	21269016	18708354	64199672	61732616	59154648	45647000	43703824	44510824	53669800	53943664	55209176	22230558	21936328	21528336	74388528	70883856	76563960	55605576	53493044	54278804	50925520	50057940	50306820	124697736	125550672	124121808	23725728	23939858	24095876	8164776
Methionyl-Glycine	MSMS	C7H14N2O3S	205.0601:1567017 206.06345:211699 207.06681:31297	55.05508:694 55.9353:5447 65.03941:5609 67.05506:688 72.93787:19490 78.65654:654 79.05466:903 79.94488:651 82.56535:621 90.94825:9775 91.05484:1783 99.3898:779 99.94823:1868 103.85278:687 107.37449:716 108.95882:3208 113.96412:1255 117.95837:1221 121.02808:974 131.97417:2416 149.02313:1243 150.1284:792	23145790	24629476	25684320	28717430	23073982	24038236	25011852	15889220	14954660	13570029	17338912	14805812	17430816	10297022	20199346	22743380	20212010	20377502	21290162	9397934	21982622	21189040	12711027	10444782	21960644	11933226	21888402	21797022	20020166	22137254	12103988	23168906	24466266	11095302	24774184	23043150	13434916	24512574	22548278	22616666	11986550	11366668	13331830	23473148	24217672
MG(12:0/0:0/0:0)	MSMS	C15H30O4	275.2218:1452896 276.22515:270926 277.22851:110345	51.40355:946 53.00304:1340 55.05518:4535 57.03435:2079 57.07076:27936 59.04997:1226 67.05502:6465 71.08628:5813 78.31474:699 79.05498:1022 81.07054:3563 83.08596:878 85.10166:1441 95.08604:3910 109.10188:1229 114.6389:873 117.09214:880 136.0659:854 147.0722:905 165.86259:902 183.17426:1283 254.2307:1078 257.21219:2178	1110243	2506108	2560019	2272646	16525882	2051925	16863514	4537252	3794305	61358	105318	147790	120915	80481	573809	48455	75646	151276	1542772	242793	157326	146152	198590	115737	92243	9361880	5417501	12697843	154337	111211	81487	72188	2150555	42843	2632016	2884990	2420225	4656516	176211	4862516	2842153	2545523	2621530	122164	14244893
MG(16:0/0:0/0:0)	MSMS	C19H38O4	331.28436:27779508 332.28771:5547972 333.29107:821822	55.05514:116171 57.03431:62727 57.07076:815064 61.9808:19236 67.055:226059 69.07056:84303 71.08626:382837 81.07053:170779 83.0861:74356 85.10171:92322 87.44676:17996 88.72543:19678 88.82932:18480 95.08614:236129 97.97461:21349 98.34653:21732 128.84872:21401 143.64919:25429 239.23758:39718 313.27292:103162	41819592	117326792	48528336	395239616	64220600	351617920	14970957	97377536	30501976	25398946	30871128	8536404	31664186	13713646	34212980	38866392	47499604	10834313	11740324	13761895	9489797	16021470	14323145	16669342	19640666	27351058	8930249	16250758	8493488	48524616	33342428	7756096	51468500	4847052	6451520	11235779	16118856	18032752	13940781	55416252	7866008	25699148	51953052	18852608	21312112
MG(18:2(9Z,12Z)/0:0/0:0)	MSMS	C21H38O4	355.28403:969246 356.28738:190770 357.29074:142767	53.00293:1281 55.05515:5196 55.10628:930 57.03423:2436 57.07076:14491 64.06854:861 67.05504:7284 69.0707:5913 71.04977:2676 71.08622:10667 79.05473:1498 81.07054:11188 83.0862:3088 85.10175:3540 86.55862:1029 89.67539:995 91.05775:2355 93.03703:1757 95.08591:11933 97.10134:1993 104.7376:949 109.10157:2253 112.48629:907 263.03677:930 290.97476:939 355.28354:11594	12368652	10951421	15436515	6615936	3734940	4945731	3879525	5941464	513982	586373	425063	512196	207928	389917	779760	390601	686232	961969	475751	739975	443379	560669	577901	2518730	1150779	695474	618523	898946	391279	582618	901621	610685	753019	548920	639636	568144	1606764	1367162	2979410	646545	522804	1212644	827160	1008857	1284758
MG(i-16:0/0:0/0:0)	MSMS	C19H38O4	331.28415:1981116 332.2875:413559 333.29086:415947	52.73093:1100 54.6697:1102 55.05289:1030 55.0551:9664 56.50499:1186 57.03431:3249 57.07076:56273 67.055:13211 69.07055:6124 71.08628:24638 81.07052:10954 83.08625:6221 85.10177:8292 95.08612:15063 97.10144:1564 97.51555:1222 98.98453:9147 101.76887:1344 102.48527:1376 103.07586:1558 107.08572:1481 109.10154:5776 118.9982:1275 126.02486:1305 191.15245:1410 239.23755:2955 257.25:1752 313.27374:9993…	11682969	10680389	20238428	26548800	10847253	10048797	16992412	13882865	45921388	32887410	57080504	21173434	20349426	14960747	41293900	3656392	16076589	6140448	11596463	12375617	6706356	4005710	4402102	13749496	56128556	19443494	38782952	9257802	39386940	58442132	4450707	2072121	14231687	58524008	40337292	52453264	12077356	22054744	7812290	3603939	9314223	13424225	5774436	5531324	19540462
Monomethyl glutaric acid	MSMS	C6H10O4	145.04962:952530 146.05297:49177 147.05633:344220	53.93988:1403 55.50365:588 56.96566:2693 57.02494:624 57.03434:2564 58.06594:1281 58.9334:816 59.94135:872 62.92994:7052 63.94315:1681 64.44946:666 67.93546:938 77.58716:678 85.02901:6324 85.08488:1073 94.92983:711 97.00808:3761 115.05396:896 116.9663:2763	3505268	4114998	8727638	4389367	8480699	8754967	8479726	9385722	5545814	2905970	4777126	5026136	3684086	4241689	4435634	3791946	5175426	2233059	6109842	4452510	5491896	3437092	3859230	4337350	4631574	5313792	4859442	5363026	4175648	5950914	5690182	7333501	10156037	9726370	5262317	10105531	8536394	4821888	3131750	7739285	3813244	6586056	4313134	692952	6737032
Myristoleic acid	MSMS	C14H26O2	227.20079:806025 228.20414:552135 229.2075:166186	51.84497:689 52.4423:679 53.00305:1235 53.03948:1511 55.01867:661 55.05522:9147 56.37202:872 57.07066:2392 60.86656:636 67.05506:10738 67.67243:690 69.07068:7741 72.32172:657 75.60545:701 79.05501:5022 81.07073:5039 83.05001:1796 83.08636:1073 91.05476:2730 93.07041:2877 95.04955:1621 95.0862:4568 97.06531:1939 105.07028:1380 107.08607:1303 109.1017:3285 113.04139:774 121.10137:946 123.11684:1089…	6426832	1413838	5945696	6878226	5717476	5472742	12626755	5446728	13787037	5282444	5764804	11319222	6637744	5670329	2544008	2140884	1656564	1662980	5490025	729675	4072937	5196874	5095354	16520243	16920872	16445797	6725228	12898986	12514767	2787808	2690483	2538746	7207718	11164688	11330003	885100	2400708	3666208	403370	5881353	2617884	3257574	6410644	1833208	502144
N-(3-(15-methyl-hexadecanoyloxy)-13-methyl-tetradecanoyl)-L-serine	in silico MSMS	C37H71NO6	626.53485:1166543 627.5382:580301 628.54156:236139	52.55846:1246 55.05483:2225 57.07062:18435 65.00569:1142 67.05505:6452 69.07066:8470 71.04604:2516 71.04979:28784 71.08617:16538 81.0704:13604 83.08604:13204 85.10164:7268 93.07034:3907 95.08592:20982 97.10143:7617 99.08056:8091 107.08559:2723 107.57445:1300 109.10136:14438 111.11704:4143 121.10112:5122 123.11671:7162 127.11143:4051 134.02705:1414 135.11688:7914 136.61958:1278 137.13283:1895 155.…	6436328	6439742	1556632	1313581	479314	1733591	13597017	1228652	292098	416318	517990	761175	293372	329918	914041	433203	897271	784674	798955	696308	2382966	3565372	7023000	2201920	2089199	2649857	2934721	2883192	890924	3162852	2673352	2872370	3258225	1691361	4521087	1901664	5102650	2596258	1407545	1687066	774758	3723525	2854080	2262026	1332613
N-(3-Methylbutyl)acetamide	in silico MSMS	C6H13NO	116.10722:250762 117.11057:68464 118.11393:15786495	53.03934:2476 53.20033:2244 55.84792:2086 56.96545:5085 57.93549:3703 58.06591:12623 60.21428:2159 61.31442:2066 61.71162:2334 63.80978:2468 68.05032:12986 69.99302:4921 70.06588:272052 80.79701:2374	464619	344409	316212	54118	1620011	615431	527982	61084	2144226	382967	175381	423844	63535	1494499	239147	239633	430591	1499158	259878	426549	272889	29057	63493	16304	289186	1152736	131978	388122	58091	11950	1799001	2945773	1008688	1156173	212394	40355	60862	384591	184828	201409	93215	33019	472674	43305	25354
N-(tetradecanoyl)ethanolamine	MSMS	C16H35NO2	272.2583:3187151 273.26165:567909 274.26501:182737	53.00302:1962 55.05488:1493 56.05035:5883 57.07077:19724 58.06319:1436 58.06596:18862 61.83586:859 68.05006:1590 70.0659:9559 71.08614:3247 72.04504:827 72.08139:3923 75.25388:847 84.99568:834 86.06067:21957 86.6965:924 100.07613:21353 206.28947:916 206.54697:892 216.28372:923 238.6983:983 254.2476:35692 272.25882:13970	3518046	3481013	20643370	1213643	3359846	3000430	3449936	3324407	66701	233786	2540333	2956803	2897510	1625112	2559770	2402756	2313101	2299872	1503082	2220277	306511	3353727	3431625	1598764	3446983	3774800	734521	2734277	2407528	2864908	2733156	2798476	1296984	2595292	2489782	2597146	2960895	2403660	1193865	2383621	1306048	2632272	2059472	2498736	2311618
N-[(3a,5b,7a,12a)-3,12-dihydroxy-24-oxo-7-(sulfooxy)cholan-24-yl]-Glycine	MSMS	C26H43NO9S	546.27545:1661207 547.2788:518008 548.28216:75378	52.67677:1029 56.05032:4536 62.45046:1015 70.06599:44946 76.43975:1033 86.09715:17968 87.7834:1131 92.47679:1141 97.0686:1099 99.34831:1126 104.05343:29898 129.4639:1201 158.23344:1281 159.09186:1661 173.11044:2374 181.09703:4615 183.14948:25368 188.07126:9295 201.10587:7250 205.09688:7855 211.14426:7512 229.10115:3534 232.90514:1467 294.18198:5125 318.18192:5862 324.17551:1471 342.18536:11021 41…	12880177	12770967	13019272	13426604	13105962	13203314	13249000	12944260	12799234	12644090	12860371	21321204	21515882	21886970	9464117	9580171	9305020	11784309	12079486	11832862	13962232	13941591	14048656	12713906	12508504	12648247	15601159	15846822	16180397	15410303	15401883	15657915	25555898	26201520	25982668	17199018	17124782	17260320	14821493	14731422	14873160	17035268	17185896	16863336	12091322
N-Acetyl-D-mannosamine	MSMS	C8H15NO6	222.09737:47169140 223.10072:4557901 224.10408:477925	51.15979:16482 51.3692:18436 53.03954:30516 54.58009:17040 55.05506:31683 56.05024:62418 60.04529:40699 61.02925:19206 68.05023:67263 69.03426:59879 70.06597:40806 75.12534:17395 80.05039:23794 81.03434:24558 82.06622:20972 84.04501:185987 96.04504:244766 97.02898:34067 98.06053:45207 104.42059:22555 105.00096:19470 126.05521:60533 126.9665:19416 138.05492:85268 144.06577:31197 154.01959:20193 19…	298843	192321	55719	61243	58876	97783	347868480	121290	55213	96070	53737	108343	279391	123583	261591	320484	271363	167209	175287	80501	90784	51572	73753	111151	1227588	71438	93357	50840	1199580	132001	489358	55317	230914	211464	115128	96103	40389	26017	84439	113810	45273	62547	452252	186563	56423
N-Acetylgalactosamine	MSMS	C8H15NO6	222.09714:48387108 223.10049:4244720 224.10385:512935	53.03939:68720 55.0186:37837 56.0502:99077 60.04521:42831 60.12141:20933 62.77949:20166 63.71358:27266 63.76764:21137 66.36229:24474 68.05018:49505 69.0342:98241 70.06583:66376 72.04485:37269 78.22758:21941 78.36896:22528 80.04999:39739 81.03431:49894 84.04504:299137 84.57027:24926 85.59476:20835 96.04478:319713 97.02866:40746 98.06033:82760 99.27332:24056 109.02841:32737 126.05497:71834 138.0552…	360183776	363010464	353020512	358738656	355383456	358714944	295180	350766656	376428032	371261248	370669248	493688832	942665	488802304	257340464	258570976	256311520	289449	338774688	17623	375398784	371965408	491935	362806048	361930176	365267520	373163072	372450368	373669344	387103360	386331584	385308896	314251008	313543648	307505440	329561728	331296576	329811712	266634016	269481600	268328384	270721664	273130752	272598720	285127168
N-acetylsphinganine	in silico MSMS	C20H41NO3	344.31583:3926766 345.31918:869853 346.32254:88558	50.02611:769 55.05503:1440 56.28763:847 56.78296:894 57.07066:12950 63.39071:897 66.52921:940 67.05508:2061 69.07045:1180 70.06579:34266 71.08614:6418 74.0213:863 75.06758:953 81.07037:2629 85.10164:2327 88.07613:57866 95.08582:2207 106.08653:16670 186.38945:967 213.07687:940 283.26239:8586 344.31561:12735	26388806	26130310	719025	507075	5152	37046	6403	26858666	7396	3780	4977	190877	7217	388828	251710	279472	67763	5307	93450	61703	5713	286463	222891	417686	5977	260244	4436	110612	333399	9553	350131	4594	13521	229397	10666	641794	6350	4318	256287	10994	252838	7754	256643	1610393	44256
N-Acryloylglycine	MSMS	C5H7NO3	128.01933:9821391 129.02268:1530202 130.02604:1879457	52.91476:3693 55.7849:3865 56.96555:13160 58.96144:6355 59.93098:6422 68.98283:10793 69.9329:3697 70.39288:3642 71.78551:4182 86.99321:21283 90.4416:4067 100.02467:8958 105.00372:41470 118.03498:6143 123.01363:16997 128.01996:4942	67449544	68920064	68153464	63607528	69121888	69645184	76120608	80336952	18796996	18747962	16863982	112959808	120569256	124432312	23596904	30693804	31021624	84116064	78786472	81394616	63568636	57834628	59853048	43336908	40772668	42377900	25323196	22886562	23744928	66063348	61520792	60160016	20393180	16532655	14910252	39309088	42624740	36599112	55505784	63308948	61503168	29831278	26660404	28714080	66291024
N-cyclohexylformamide	in silico MSMS	C7H13NO	128.10709:5652209 129.11044:571874 130.1138:97525	51.02404:1282 53.00312:9019 53.03927:1423 53.77644:1101 55.05505:2895 55.93522:1143 56.9291:1179 58.06599:21505 60.04519:9768 68.99779:1818 69.07053:5163 73.22861:1197 84.90468:1492 128.1071:4873	33308200	32357816	33229826	31628094	31149526	31246222	30569182	30993240	943401	35445348	35463256	31603946	1826995	31541566	581737	1802278	30033742	1785451	37831772	38458780	36963084	37638488	36721680	35983840	36831120	35787340	39617100	40022016	2768395	932205	2334782	35366240	25386246	24057096	23992392	34409676	2397821	1380001	37053144	2228198	681704	40107724	2066700	38675152	44554452
N-Decanoylglycine	MSMS	C12H23NO3	230.17522:979378 231.17857:174438 232.18193:191248	53.00305:1477 53.03955:1124 53.04421:622 55.01865:3158 55.05269:1242 55.05512:13738 57.07067:3346 58.06599:1105 66.45612:848 67.05499:5013 69.07061:9259 74.26917:770 79.05484:3255 81.07055:5064 83.08609:2272 91.05484:2465 93.07057:3780 95.05006:847 95.0864:1050 97.06522:1783 102.2376:737 105.07035:1140 107.08604:1530 116.58894:928 119.76555:830 135.24464:853 149.13219:1325 166.15884:2184 187.7909…	8716347	8548351	8212026	8244471	8173072	8132476	8522093	8574715	8177392	7950240	275808	7948882	7954294	1533038	7810608	7610487	7916876	7503883	7673878	7649634	7506170	7768938	7846616	7584154	7594306	7670962	7645951	7562964	7749912	8370911	8073969	7951108	7828980	7803588	7716552	7751377	7573698	7808934	7662552	7751012	7842136	7943636	7745098	7772901	7844258
N-Isobutyl-2,4,8-decatrienamide	in silico MSMS	C14H23NO	222.18523:1817896 223.18858:341396 224.19194:116345	53.03935:3081 64.95203:2484 65.36647:2405 67.05493:3002 79.05493:6797 88.31587:2723 91.05479:26249 93.02876:2945 93.07038:3454 95.04944:2831 98.32547:3130 103.05498:4124 104.06218:3506 105.07016:24505 109.10162:5396 117.07022:6373 119.08595:30398 122.07266:8147 133.10132:8947 134.10886:4147 135.0798:3542 137.09607:13164 147.07964:2860 149.09604:3076 161.09523:6461 177.12741:17863 195.02815:2778 2…	11984630	12082430	12174113	12050148	12362581	12225857	12075943	12068231	7239652	7248627	7169586	22485760	22390560	22683824	7195510	7370840	7316194	15853349	15996614	16175866	17176234	16887146	17056936	23390236	23318802	23412294	6414714	6313222	6346822	6024071	5971090	5858484	6430704	6411072	6361204	19896846	19627164	19800422	20432120	20564220	20264772	7282628	7082604	7189861	29018934
N-Isobutyl-2,4,8,10,12-tetradecapentaenamide	in silico MSMS	C18H27NO	274.21646:1405167 275.21981:313482 276.22317:25517	67.17339:761 69.0707:852 91.05487:1025 98.81094:830 106.06538:6436 116.05119:1123 119.0731:53978 120.08066:2125 132.0807:4136 134.0965:1793 146.09691:988 147.10364:4477 163.13551:3793 176.14323:83541 188.69643:890 201.76155:964 202.15967:5926 204.17432:6692 229.86687:937 274.21603:19385	10344965	12899230	10758379	10463449	10823810	10966516	10432055	10594894	12883972	12474048	10879291	10247022	10422733	10787314	13096021	10831317	10796163	10939023	10478337	10623912	10125524	5034942	10097365	9948189	10010401	9951763	10634782	1053460	10561038	10363833	10399297	10518795	11278579	11290912	10523352	1047152	10355224	1035583	10331147	9985522	9880798	10981394	10752744	10327523	10546910
N-Jasmonoylisoleucine	MSMS	C18H31NO4	324.2168:713945 325.22015:157685 326.22351:0	53.43908:968 54.4339:725 57.07061:2045 75.53268:1012 148.38577:974 149.02324:3839 154.83224:906 162.27252:931 242.81653:970 278.40363:1247	5282230	12136070	5800229	5805066	7655892	6684344	6686536	3739779	1979054	1005032	3643959	4411408	1397926	7242894	2188992	2160152	3827398	6003940	3186189	4649684	1979658	2502988	5030574	2804478	3702821	9027628	1576665	5576807	2807825	2251442	4591034	1241779	4183518	4699252	6798256	4063702	1564751	1928223	4093011	8016022	3794346	3514447	2899581	6652377	5669491
N-Methyltryptamine	MSMS	C11H14N2	173.11732:626643 174.12067:1577921 175.12403:379746	50.58316:644 53.31164:740 55.05513:6971 55.93524:3889 56.96553:975 57.03431:2030 59.04995:1309 60.96222:678 62.67952:644 67.48939:776 67.66725:648 67.93546:1186 71.93003:1418 72.93784:3997 83.04971:631 83.63855:623 89.16702:641 90.90374:24217 90.94819:2745 91.05464:694 91.3187:866 97.00811:1886 103.0542:1062 108.91405:2153 108.95836:978 149.94006:1879 173.07896:1680	5821974	5837257	5748552	106643	5615912	166004	7870593	5638624	151778	119383	136907	268925	152059	161473	216057	128035	71999	245710	45609	119519	121059	170916	159533	186363	17564276	84811	169030	20291090	20023854	100308	2076296	65116	9238506	9439608	9339595	6585943	105603	4388644	6360205	6203198	6085322	9720468	198918	9597442	152569
N-Methyltyramine	MSMS	C9H13NO	150.11249:128491 151.11584:150077 152.1192:19262	51.02374:3012 53.00296:2290 53.03946:6769 55.01876:1042 55.93522:1633 63.22151:1075 63.92932:3900 65.03942:9448 66.57002:1254 67.055:7942 67.93573:2169 72.93778:2889 87.40957:1195 88.44717:1233 90.90376:10095 94.06565:5828 95.04934:2216 97.00789:4640 100.55536:1321 108.37594:1871 150.05463:2609	435097	549044	172881	232310	928623	404790	598176	270622	490831	364014	347234	328454	1133319	312232	464073	316011	289798	262339	544332	646414	200032	241666	122175	255630	245971	443424	158379	498675	226916	296653	543688	310040	565914	288628	153611	393262	444276	280252	175036	511174	473395	631723	504666	127910	371840
N-Undecanoylglycine	MSMS	C13H25NO3	244.19095:4246160 245.1943:800551 246.19766:80908	53.03943:2648 53.33241:1483 54.71424:1265 55.01863:6489 55.05517:46977 57.06865:1079 57.07086:11525 58.06571:1419 67.05507:14099 69.07071:20927 69.68517:1248 70.06631:1343 71.08626:2365 72.04517:1392 72.08158:2779 79.05502:13526 81.07064:14583 82.0661:1896 83.04948:2025 83.08627:12097 85.06557:1402 86.06075:2601 91.05472:4601 93.0704:8242 95.0494:1464 95.08614:10975 96.08163:1458 97.06537:3217 97…	34840376	34855404	36145980	36402352	35422580	34432152	180688	35858184	31461002	31879468	31884440	3861426	31993198	32250728	3751818	3925989	30376270	3669101	29299122	29932604	29246302	29621756	3557736	29671810	31060746	30691258	31655502	31054864	30440622	31806258	31266262	31739224	30850054	30631858	30662544	30020224	29057606	30415636	30217266	30202152	30919870	31200220	30296608	30747380	30441912
N,2,3-Trimethyl-2-(1-methylethyl)butanamide	in silico MSMS	C10H21NO	172.16954:2142519 173.17289:274384 174.17625:0	53.00308:1643 53.03952:630 53.46322:592 55.05513:5737 55.93521:779 56.05843:3466 57.07067:2485 67.05489:1173 71.93006:7286 72.04514:9577 72.93475:645 72.93787:6031 73.0484:4159 83.07924:611 84.08958:677 88.07635:823 89.18329:665 90.94812:2700 91.05469:732 105.94975:643 107.9511:692 125.9611:1671 130.53549:609 148.97693:831 172.15353:945 172.16937:2040	30137318	19224654	30809374	31796644	30185734	32278440	31983482	31227594	33881664	33294012	34500920	24852814	25465392	25890958	26365688	25831368	28820778	14708518	13216467	26557544	24426630	25864932	12656623	12427767	25921804	11682159	27505194	30801462	28245428	34789520	34642824	35754336	37485932	40478908	40336564	25891628	25796932	14501528	12698244	25792148	24448054	13062967	12127621	26111312	24386610
N,N-diethyl-m-toluamide	MSMS	C11H15N2O	192.1384:1368501 193.14175:532304 194.14511:396578	64.36602:634 65.03949:18128 67.05505:1192 72.0451:4426 79.06055:667 86.99323:680 89.9612:634 91.05485:79065 95.04941:811 102.71155:747 105.00369:3312 106.06561:1399 109.06526:14742 118.06549:1613 119.04939:17858 119.06052:5272 123.01425:1626 128.01991:1154 131.12549:647 167.79306:933 192.13754:3477	15653063	16635172	15665541	16052970	16196994	16006066	16356280	16765642	13050357	12697009	13262266	20809168	21263504	21664144	13527353	6594070	13192855	16776987	9873533	16454042	19203120	18957964	10795479	20979250	20987330	21046538	12883340	12765928	11532323	13001773	12647199	12606858	12932798	12853670	13155650	19789596	10298785	19993670	19941590	20383784	20655726	12641507	6120100	12750907	19364830
N,N-Dimethylaniline	MSMS	C8H11N	120.08109:11532054 121.08444:1000998 122.0878:2821966	50.01599:27392 51.02391:182131 53.00326:5942 53.03952:58010 56.29803:5272 58.72314:5822 65.03949:70210 77.03936:51292 91.05481:63557 95.04972:103312 97.00801:14138 102.04704:11785 103.05468:52407 105.04526:23651 120.08109:22206	40255304	40418456	42152616	42957884	42181756	42484044	43031624	42812808	42200224	41738920	42035760	43902904	44911448	45447696	31454076	31644526	31616228	40047208	39510628	39181780	43732152	43609724	44022008	40671908	40453192	40559788	38234860	37713480	37756392	40477680	40328536	39853708	62206348	61327048	60886200	38488208	38194300	38456364	38168836	37969656	37729972	40492108	40119060	39820440	38084816
N'-Formylkynurenine	MSMS	C11H12N2O4	237.08702:9561103 238.09037:1104478 239.09373:159395	53.00304:3898 53.03939:13995 55.05488:4597 56.05019:4033 60.20868:2803 65.03936:12337 67.05498:8834 71.01339:5679 74.02445:28359 74.65224:3044 82.06557:4411 84.08139:8099 91.05484:173431 91.79929:3700 92.05003:45740 94.06562:75852 95.04984:20301 99.00824:14206 103.05466:10259 104.04996:46863 105.03392:7314 105.04492:7818 117.05772:28629 118.06538:217232 120.04466:78205 120.08102:11953 128.04953:3…	36114056	36491560	36820296	37451484	36254448	36991660	36444732	37102524	18986394	18820264	19071198	51356792	51726092	53333308	22145640	22003754	22142680	35972416	35605616	35539004	57185028	57347492	56595472	31564100	31583336	31965414	47683428	47008264	46584772	14409204	14608189	14512614	43143208	42870612	42513532	30739212	30077592	30490608	44744688	44731232	44932220	15966006	15476611	15688339	54077924
N5-Carboxyaminoimidazole ribonucleotide	in silico MSMS	C9H14N3O9P	381.0791:239272592 382.08245:35628408 383.08581:16060884	61.89439:7952 63.2234:7033 65.44251:8300 68.36643:7110 69.24084:7468 69.52202:8027 101.32423:8752 126.99573:9530 149.3709:9655 150.23351:8894 182.48039:10504 314.96155:9104 334.54407:8647 381.0795:290110	1036604864	1014050304	943010816	938323584	936880832	946153600	874418944	864332288	355936000	354949440	362908384	1309209600	1314289152	1196932608	577708160	576778432	558765440	1580277504	1515182848	1479168640	1135458432	1137042432	1135081856	1144916224	1140411648	1143089920	763374144	774808704	776421504	1602265856	1599997440	1630804224	843036992	836205120	852215040	1012228672	1009050944	994998848	1659509248	1679762560	1644042752	28959	761514304	797510400	618498240
Nandrolone	MSMS	C18H26O2	273.16739:2887154 274.17074:356305 275.1741:96845	58.35354:1532 58.45303:1660 58.74398:1497 79.82716:1781 92.39006:1776 117.61761:1688 118.6169:1709 273.16705:51714	32877588	67060620	68978440	72237048	67791632	67928784	56783084	68984432	42680824	2898809	18914410	27946612	63630708	68528896	29699568	30290732	11752901	64118372	22164860	20885766	39551016	70412776	58062888	35592068	72297168	7030598	11561139	29491816	1344524	17928554	29815536	20339104	32855408	31648794	33659700	38390636	61265192	38422896	73308032	60778968	75056752	48171196	32468826	27382614	76943744
Neryl propionate	in silico MSMS	C13H22O2	211.16904:2043519 212.17239:310404 213.17575:764577	53.00312:2339 53.03947:6281 55.0187:1442 55.05513:36314 55.93514:3050 57.03415:1156 57.07063:2370 58.44927:1163 60.22058:1015 60.74582:1107 63.01903:1124 65.03928:5187 67.05145:1936 67.05502:37268 67.28746:1224 67.79491:1214 69.07056:5712 71.04984:1379 79.05486:13810 81.07051:19115 82.10966:1154 83.08617:1498 91.0547:14520 93.05772:4695 93.07038:6345 95.04963:3911 95.08584:9943 105.07016:4386 107…	30985532	30565906	30964254	30990522	32655050	32029914	32988054	32849692	29986068	15014553	29421332	28966796	29418502	30166874	29731796	28813926	14995082	13548383	29211618	28825198	15839518	29067860	15268058	16052443	28947772	28612132	29847058	17426128	14815138	16107610	14940121	30035440	16944462	30269724	15232615	15915512	16558871	28302228	28920686	15428685	15318151	29384058	15739139	29936940	28676046
Niacinamide	MSMS	C6H6N2O	123.05547:21752276 124.05882:1965520 125.06218:238855	50.01601:6830 51.02387:22504 52.01712:1032 52.01913:13839 52.03159:5323 53.00306:2208 53.0395:70021 54.03465:951 58.99842:1665 68.05014:2383 71.0838:952 78.00156:1160 78.03463:10581 78.37523:946 79.04214:2653 79.0547:1343 80.05016:71621 95.04947:1289 95.16821:1091 96.04488:41815 103.14265:1074 103.93424:1139 105.04465:1163 111.03189:2117 123.0554:19810	85375720	86901544	87579664	91142560	87836352	89206832	89524912	90642624	81359664	81569960	80468664	98418752	101182880	99518144	112197648	111718904	110776216	67449416	65955792	66881816	80832592	80330960	80844272	68706464	68719984	67547216	78683512	78726152	79267232	87146944	87071080	87380016	66575468	67402808	66553228	95414232	96075128	96214408	108442448	107260928	107824552	103997872	104484384	105527016	84289536
Noravicholic acid	MSMS	C19H39O6P	395.27737:3428842 396.28072:802265 397.28408:81287	55.05524:1856 82.3997:1984 354.26782:4946 395.27762:97558	2859401	6289858	11135730	7071110	3205041	1439072	1143194	39862404	43456	231582	191897	599256	1382536	1238379	76512	64442	215753	133836	328365	103815	2253667	590265	870659	1831642	586713	1628068	235449	186658	1251542	631987	362822	877425	110737	275941	1235290	1896036	1463416	686151	943981	4507800	519603	1094316	1005225	677558	156473
Nordihydrocapsaicin	in silico MSMS	C17H27NO3	294.20648:3535704 295.20983:996955 296.21319:129969	51.51689:1692 53.48554:2479 55.01861:6956 55.05508:2018 57.07078:45405 60.46069:1813 63.68245:2383 71.04975:6461 73.82308:2716 74.10223:2442 91.05495:4295 105.07021:7882 111.68629:2582 119.08534:2336 121.06479:2936 128.26541:2457 133.10135:9937 137.05952:11235 146.07245:4326 161.09599:72748 165.0549:10821 175.11191:4421 179.10603:12863 203.10693:10676 221.11713:27299 245.24266:3033	5701029	5655694	357724	47465008	5328436	2971395	4936253	55907796	39150016	20683654	16173101	5672278	13387024	57961128	37326704	36822788	21265590	4620298	51573636	4064363	64170796	10168498	10066543	11169324	5877788	5802592	314885	144504	298047	111607	128054	216040	134478	158617	249636	342574	6830950	117188	5545732	130740	73589	134239	13885436	322862	6012808
Nordihydroguaiaretate	MSMS	C18H22O4	301.1409:11102890 302.14425:2026507 303.14761:164305	50.68555:6510 51.60952:6880 53.53452:6799 92.68893:7177 125.78275:8883 137.17137:8065 301.14102:30806	181378032	182990624	219896080	210157936	188542880	82030304	198922624	196859552	69652064	84694912	55469404	60701236	431832	97404160	155621808	153646128	154723024	510634	163359072	107602792	162241984	164481648	70528688	88466688	104523408	170798640	76807944	119081640	183951360	114433480	178137712	173809328	176500064	70920656	85592832	188056736	181349616	150640464	61972604	182263040	123765352	105610864	180533136	183718416	80054760
Norepinephrine	MSMS	C8H11NO3	170.09653:903988 171.09988:157067 172.10324:42617	50.54364:661 51.02383:1127 53.00315:791 54.96749:652 55.05504:1047 55.93531:44549 65.03944:14874 65.92635:2451 66.04727:15572 67.30392:695 69.93472:1635 70.94235:1124 71.93004:2921 74.09669:906 92.05005:9181 93.05785:73395 95.04963:1032 103.23122:745 118.96318:1350 128.95108:1235 135.06396:986 138.75989:737 146.96169:3056 152.06248:3965 153.0695:1019 170.0965:6455	1720859	2933067	3957342	5256824	7728130	4741447	7080239	7130251	1756836	2151408	4424022	1186469	1926594	2297681	5211218	1759461	2251103	5084684	3273018	1812806	2222701	6573142	6964316	6066526	4359234	5688537	2005596	2437495	6069496	5677972	2830613	7542736	6546182	1591938	5024272	2501860	3905464	3057735	1409520	5673559	1429573	1890058	5880518	4944481	1563852
Norspermidine	MSMS	C6H17N3	130.12279:300526 131.12614:0 132.1295:1817113	51.72733:2397 52.10612:1978 55.05505:4387 56.05043:3420 58.74146:2127 61.85386:2207 67.04231:11378 68.05022:3683 69.05795:5989 75.43739:2703 78.99769:4638 82.06578:53711 84.08139:231371 85.09019:2602 97.00803:5421 130.0865:7252	1865470	1753862	2077065	1642685	2124360	2129009	1941636	1880993	2027637	675423	1634579	924897	1415175	887022	919306	992587	1011501	1186803	1160968	1335649	1557192	648338	1261921	661387	1127972	1865583	1957835	1844466	1785723	1099154	1067986	738257	6651384	6546455	6440507	1495993	1026429	995344	448271	493622	355230	1512226	1133473	1587595	573487
O-sebacoylcarnitine	in silico MSMS	C17H31NO6	346.22281:945383 347.22616:187280 348.22952:0	53.40325:784 60.01537:945 60.04525:1278 61.62669:797 63.02589:769 88.07619:1795 121.49644:930 135.60547:1047 201.6506:1042 319.70694:986 345.28757:1025	8478532	8238184	6440406	2430583	6661474	11056343	1866032	4514354	5091	3496	3318	604721	105714	284269	3274	3364	3921	19894	8563	6557	16293	138136	3522	333045	8663487	2441504	6551	3318	7835	3320	3436	3613	7623	14881	3894	6766430	14355033	1758991	19646420	10831184	19979350	2951	3102	4929	33996548
o-Tyrosine	MSMS	C9H11NO3	182.08119:13612524 183.08454:1356757 184.0879:5017162	50.01603:2966 51.02176:3010 51.02385:17957 53.0395:62496 54.68845:2808 54.88068:2785 55.01873:7630 57.17907:2971 59.68912:3046 63.14335:2783 65.03942:132400 66.95046:3113 67.0551:10724 68.02494:9364 69.00918:9729 69.04558:3872 71.22965:3065 75.0235:3184 77.03925:15063 79.0549:11291 81.03416:7394 91.05476:633860 91.18266:3154 91.73258:3193 94.04174:11905 94.09545:3479 95.04961:228715 97.02751:6259…	52572084	52760272	53758528	54817440	53872752	53830752	694276	1416566	45278444	44193864	44332204	58702260	59583972	64461120	36266020	36323576	36107576	52299272	51453852	51690652	56192360	56264088	55736072	51816052	51703772	51447848	1631646	957759	967372	48651676	47762004	47914376	67886616	67256496	66437888	47202184	47703512	47656532	45537216	45876544	45917964	46611368	45710864	45562788	51112584
Octyl phenylacetate	in silico MSMS	C16H24O2	249.18491:1203032 250.18826:448346 251.19162:479737	51.86971:643 53.00303:1103 55.05513:922 55.13483:798 57.06826:1069 57.07077:12479 59.04993:4346 67.17504:725 72.80218:812 91.05489:2101 95.08652:924 103.05462:1168 105.07026:1457 115.05466:1582 117.06999:3852 133.06503:10718 137.06036:970 143.0845:819 147.80971:812 161.09555:5424 161.15128:838 168.31337:765 173.65598:835 193.12216:3953 218.6676:838 249.18365:5745	20236998	18542704	11061837	20259920	19069650	10761615	18785204	21384610	19489964	3394148	18880120	4976603	7725316	4287614	17548378	8389724	18432934	5148892	6791072	4993900	10074963	6664972	7009152	5617906	8387967	5579844	10977909	19259410	20641242	9347404	17922184	10665899	3299922	10432459	10452923	6524754	7442050	7708272	3415336	5766938	7971596	11729304	23272896	23220422	6688370
OH-Diaponeurosporene glucoside ester	in silico MSMS	C36H54O6	302.69073:832468 303.69408:92127 304.69744:0	54.89673:768 55.05509:3238 56.9655:2861 59.26908:782 65.95171:777 67.05493:1181 69.0708:4775 79.05486:2368 96.08126:8796 105.20251:903 107.15533:1064 142.0697:1423 142.64842:999 151.07588:929 171.70549:966 180.60172:1256 188.05962:1523 189.60559:1393 205.6272:1084 214.63319:2601 235.15956:1238 240.37697:947 244.78847:1007 262.16794:1115 283.13156:1292 293.68665:2804 302.69153:7163	5842146	2945702	3356750	6589991	5381264	1707518	6445248	6134238	3308168	2969256	925608	183.815	183.815	183.815	605169	4123916	3565701	183.815	183.815	183.815	183.815	183.815	183.815	183.815	183.815	183.815	1196836	9503329	4875967	2865212	1158853	10695621	5628514	2790142	10386159	183.815	2416	183.815	1945	183.815	183.815	5099838	935198	9353878	2024
Oleic acid	MSMS	C18H34O2	281.24756:577397 282.25091:233556 283.25427:257724	53.03932:961 55.0551:11535 57.03413:905 57.07076:7368 59.37844:754 61.74215:768 65.0395:867 67.05502:10011 67.70623:837 69.07063:7468 71.08601:2385 79.05502:4133 81.07051:10808 83.08604:2524 83.10201:793 85.02885:1039 91.05446:1392 91.4645:899 93.07029:3695 95.04971:1059 95.08601:5851 105.0701:1313 108.91334:834 109.10139:1987 114.73907:814 119.08514:963 124.71801:1004 133.10161:1041 141.06911:92…	7394452	2319688	7313159	7116462	6975250	7636282	6719000	6807336	567990	367811	552443	1204282	1160783	314753	101552	294838	1740245	288235	677498	217938	192594	1777808	855221	8541344	3671136	8915749	3925986	7785912	8378534	6214684	2754511	3230218	501483	6586244	6922100	7137714	6507762	3226419	3915188	2138442	3132206	6908380	7339074	4051572	6078698
Orotic acid	MSMS	C5H4N2O4	157.02437:32938478 158.02772:2634810 159.03108:559884	55.65229:10441 64.38776:11432 65.0141:35423 68.01385:945645 68.99791:11671 69.0058:13761 69.009:96552 69.99305:205451 104.84358:11814 111.01923:48475 118.58256:14283 131.97884:12710 140.03497:13122 157.02441:58335	240028352	243223600	244891920	254969760	237147232	239492720	242365552	246025472	60406228	37375888	52063412	162125552	164928224	197990048	190106256	191684400	186036784	198405056	195359088	200103776	207011536	202786976	203361776	226365504	226691680	228785680	218054464	219377968	221295328	212144064	207644864	213461936	218431568	215794496	217120480	131225896	130634984	129751312	203136496	203437024	206445392	199160256	194337472	197661808	234213072
Oxoglutaric acid	MSMS	C5H4O3	111.0081:5532244 112.01145:394750 113.01481:906145	53.00315:10228 53.03936:1459 55.0188:23437 55.93519:3352 57.93573:9840 58.09618:1400 58.93352:1324 68.99794:163454	49261808	50105532	50506024	51145472	51166844	50360860	50629388	51129972	9721603	6055764	21851190	9729434	8811901	78712096	29794916	6168914	26737202	47942068	46800180	10341595	8291942	9060831	42932996	8527724	8277804	8537367	8431383	7981830	32924958	52443592	51852276	53279308	14337445	13986937	14589620	8392514	8064708	8022056	48294932	48617840	48418232	49167168	50005020	49747336	57497172
Oxysolavetivone	in silico MSMS	C15H22O2	235.16917:5177490 236.17252:789269 237.17588:659656	56.62869:2726 57.07075:125230 70.88559:2817 79.08953:2761 95.04945:5917 97.66114:2885 107.04951:6064 127.16536:4045 164.33002:3173 179.10657:21971 184.83739:3048 235.1687:43155	70412440	74277832	79307168	81000488	75512000	73019048	79958656	82113848	35102176	65116924	63624652	56905628	62543784	64567000	69838800	1922878	66749968	1851341	1549144	1228095	63856564	31706560	34672892	65647356	64455200	65918984	70362968	69647864	74218752	67351152	69236312	68287888	73375440	72486400	75682488	66280424	66694936	67343928	67826152	67465544	68460568	71493520	70782224	43161036	70240864
p-Cymene	MSMS	C10H14	133.10126:1299344 134.10461:148972 135.10797:215834	50.01604:1219 51.02383:6020 53.00304:2271 53.03952:7472 55.01875:1267 56.05032:818 59.93111:8418 60.93122:849 61.92865:3319 63.02351:668 65.03946:5967 66.24737:640 71.99093:3571 72.99876:10253 75.04445:578 76.96739:616 77.03911:2224 79.05497:5978 79.77493:540 88.02203:5326 88.80975:668 89.03909:1050 91.05467:6273 92.31115:668 95.04967:12716 103.0547:4547 105.04515:2888 105.07034:9101 107.9594:535…	21258204	11709260	10243481	10760362	22199118	23020244	10536727	23495462	9254740	11839400	10780082	9878697	18015390	11553352	3022791	9798170	12024123	9395482	10722732	7928996	18975902	11281367	16393539	9889677	11996327	18520282	18713334	22359434	9172856	10989177	18219846	10077947	10698509	12141568	10827419	9439063	11189885	10600048	9376429	10515337	9894156	12546903	12732523	20741442	10745208
PA(16:0/18:1(9Z))	MSMS	C37H71O8P	675.49701:75151 676.50036:328107 677.50372:60194	56.7692:1404 77.51782:1601 164.10506:2752 184.07298:11965 186.01949:1787 186.83702:1931 254.12459:2031 281.64175:1915 313.20282:5897 326.20874:13824 340.22632:5548 345.19144:7831 355.24689:2727 368.25644:8161 384.03696:1932 387.23886:2184 395.90137:1972 454.31567:4925 619.40796:3410 675.47101:298040	57479	18216	152116	71334	585921	192127	430808	358100	107810	47330	73696	55375	30636	51792	160062	125030	46507	91866	134642	39629	96418	84061	53414	88449	44909	123289	93271	72728	46496	9862	18504	37498	50714	39563	47717	32143	42278	14284	39352	38603	20286	63040	17474	24072	44060
PA(P-18:0/17:2(9Z,12Z))	MSMS	C41H64O5	635.47845:1812577 636.4818:748836 637.48516:169965	50.72631:1158 54.27689:1130 56.38823:1152 57.0705:2194 67.48184:1259 75.60755:1575 87.34915:1201 89.61568:1455 100.11198:1363 110.74298:1417 143.39839:1373 203.10648:15710 204.93791:1740 220.78647:1535 233.18944:1681 259.16916:212237 291.17145:1748 321.25378:17247 347.23346:2009 347.80054:1527 377.31613:38622 494.04001:1511 579.41479:4692 635.47778:69606	41808	15427861	15879830	16048879	162213	198480	15810595	15774198	22191	18985	7064	4704	5375	31084	15490	6024	11053	10399	4699	4621	5024	4986	6534	20743	5694	4887	29404536	110159	30212230	68024	762897	24470592	30208696	29286510	28494478	5188	4327	5398	5736	5644	8423	22333514	10961879	23030678	5150
Palmitic amide	MSMS	C16H33NO	256.26364:2081839 257.26699:310035 258.27035:396043	52.45909:685 53.00298:1263 54.01577:665 55.05501:1258 56.68114:749 57.06858:729 57.0708:9854 63.75895:855 69.07059:1073 70.06597:6907 71.0863:1436 84.60277:741 88.0763:5764 108.48796:789 118.96597:726 119.22228:713 162.98131:806 173.04472:814 202.27231:990 256.26346:20320	2023257	16479913	18016136	1942375	16442398	16294344	16759536	16080349	560840	613526	476013	715484	445581	1377493	562344	840687	8626525	2037231	651840	579936	494236	853475	644272	605582	33623424	897029	5173336	6066804	1615114	669238	522494	1403425	752806	776172	4997198	683502	34010100	32973370	665487	700975	1054487	2150124	829511	2533716	1165518
Palmitoleic acid	MSMS	C16H30O2	255.23177:780163 256.23512:154115 257.23848:119768	53.00309:841 53.03954:594 55.01855:1074 55.0551:11690 57.0708:6651 58.65455:617 59.17266:673 67.05485:3168 69.07063:5992 79.05499:2322 81.07047:4185 83.08611:1820 91.05444:989 93.07033:2319 95.04927:726 95.08607:1973 97.06534:780 97.10199:922 107.08524:804 121.10161:1006 218.01294:873 253.14857:888	8008588	4869104	8584923	8880404	7795566	6199102	5720999	6538889	370299	320799	152035	863973	247315	200527	805042	108394	668284	447457	705933	630910	377192	719488	288269	2715227	5645334	5962136	18961136	18267922	17794122	3851876	4503808	5190792	14728710	16346008	16374955	9733365	9167915	5066752	5499198	8555030	4501334	2121126	1248706	6923315	5506876
Panaquinquecol 2	MSMS	C15H22N2O3	277.17953:2506368 278.18288:476812 279.18624:432889	55.01876:1659 55.05496:2753 55.16105:1258 57.07075:76486 67.05476:2178 67.31468:1583 69.07074:1464 69.48546:1398 72.58652:1893 75.21767:1786 76.14459:1529 79.05476:2761 81.07063:3178 83.08628:2094 91.05491:3711 92.55795:1500 93.07011:1655 95.04958:15449 95.08569:1969 105.07008:3633 109.02931:2560 109.06488:3109 111.04424:4580 117.06994:2878 119.04912:4654 119.08561:2569 123.04388:2480 125.05989:6…	36257940	37350772	2534088	34330484	10306832	1763876	895431	16668156	2538412	1015644	1188499	3719715	34584324	58384256	6788566	1918188	1918655	1577666	14787220	8586928	21345254	55515448	60141956	7968640	61857180	63884216	1775832	1607542	2980473	1543657	3209944	19981146	37007116	2846597	2231894	6678584	2065104	12805256	54467608	6761490	70722648	5760206	2747155	1680725	1948153
Pandamarilactam 3x	MSMS	C8H20NO6P	258.11002:232902976 259.11337:22532252 260.11673:2937389	50.10035:6606 56.05036:41045 56.05244:6309 57.03427:20454 58.06604:61494 59.07368:16602 60.08161:458015 63.09871:7516 70.06577:15278 71.07367:314920 72.93782:10662 86.09699:882384 98.9846:490322 104.10741:897472 124.99992:757709 125.00971:12613 144.90208:8012 184.07314:110002 184.92632:9505 258.11111:67557	1225775488	1222982656	1199005696	1195949056	3726206	4072578	3286354	1196204544	48989	358531648	354765152	2902667	4958062	3360011	570438528	573579840	550964608	1753047040	1724137344	1699056640	2685874	5505844	1159046784	1166921472	1168921984	1184864000	847698944	845832384	835794496	1362302208	1386153216	1393952384	364908896	364347424	369900960	1228368000	1230924800	1224609280	1215563008	1217541376	1210889984	711051584	707185536	714661760	1392964608
Pantothenic acid	MSMS	C9H17NO5	220.11807:119336688 221.12142:13550153 222.12478:1572401	55.01876:139369 55.05505:294421 56.01393:303466 57.07069:270127 59.05005:213812 65.03931:88554 67.05515:659184 69.07059:111468 70.02956:825102 72.04503:307601 73.02891:123012 73.4774:93889 74.02445:107260 74.03157:94040 80.43027:94742 85.06549:184498 90.05547:471758 95.04953:172253 96.08135:102313 98.02411:145386 116.03444:104468 124.07592:213738 166.87236:92313 173.50546:92825 220.11787:138601	207730	39629	11094	22876	475099520	476363488	472684096	18223	35234	13088	8843	11669	7143	21172	9058	7736	21298	18397	18290	46708	12138	16204	19481	13347	65312	25503	24823	358180	19860	239994	19438	13045	17179	3294	6258	13152	5988	10088	122104	264151	219935	53100	18649	295902	27239
PC(18:2(9Z,12Z)/22:6(4Z,7Z,10Z,13Z,16Z,19Z))	MSMS	C48H80NO8P	830.55151:1149086 831.55486:491560 832.55822:93823	69.22676:1395 69.42366:1685 75.24268:1685 77.11028:1396 88.17482:1556 130.23462:1657 188.9062:1532 214.15451:1653 301.57477:1884 629.51593:1994 773.11157:2185 830.55206:79556	8227802	8587719	5001248	9353484	4596845	5062954	9905856	3937228	2457283	2318316	3445802	197.874	197.874	2718	3776007	4580131	3251654	4215	3062	3019	197.874	197.874	197.874	2971	197.874	3654	5931620	4357760	4620526	3090226	8493911	3876157	5190916	4147615	4958254	197.874	197.874	1979	2567	197.874	2129	9258421	10383001	5014446	3340
PC(8:0/0:0)	in silico MSMS	C16H34NO7P	384.2146:2170535 385.21795:413850 386.22131:68904	56.60851:961 56.64897:770 57.03426:2128 57.07074:16140 60.0816:19805 67.05505:1557 71.07377:5867 76.03941:960 86.097:58445 98.98487:2418 103.05533:979 104.10741:65817 106.8505:1222 109.10143:1766 123.83731:940 124.99989:35108 127.11153:4318 150.36638:984 184.07327:59023 201.14888:3942 247.95129:1234 298.04919:1113 308.14078:1005 350.39676:1225 366.20367:3539 384.21475:12493	2297396	2260068	2271447	15030790	2388566	15008942	15121075	15295711	2063577	3538	2003989	5366	5049	7634	2054421	2027934	2039866	5733	3388737	3318789	4784	3424	2602221	2845375	2943282	2938365	2397803	18635598	2487279	3015705	2957124	3028310	524941	3353	658909	20940196	2929079	2870712	2997274	2805634	1653694	2910219	2897667	21220586	3004745
PC(O-8:0/2:0)	in silico MSMS	C18H38NO7P	412.24588:1033593 413.24923:252808 414.25259:52068	53.14919:1027 57.0343:897 57.07061:3788 58.50059:984 59.98676:969 60.08159:15034 61.96399:859 71.07362:3058 71.0862:4109 81.07056:2547 85.10148:1667 86.097:41206 86.10219:2213 89.06018:942 95.08592:3206 104.10741:62909 124.44508:1059 124.99986:20906 125.67577:1111 145.72903:1014 184.07332:59443 229.17982:3028 253.0265:1115 304.89447:993 335.1235:1169 394.23459:3418 412.24588:14254	6974644	6783542	1867109	7088990	1892816	1872156	7067917	7171272	3256	14784	1230026	248372	172396	307702	509477	1016624	6436346	165007	14302402	142224	186645	118105	145814	13462337	2192930	2181757	1618149	10550054	10456415	12333573	12307175	12534777	2781971	272739	538735	10742671	1893347	10807365	12444165	12561218	12590808	1784582	1733282	11700615	10075238
PG(20:3(8Z,11Z,14Z)/12:0)	MSMS	C38H71O10P	717.46808:2702325 718.47143:1248885 719.47479:228862	51.47803:1227 53.47712:1438 68.19508:1250 84.42553:1296 107.39775:1464 188.62752:1746 216.58223:1578 216.76152:1646 230.67998:1561 245.87621:1459 260.92905:1477 504.84647:1573 514.06104:1693 542.07184:1603 627.22821:1542 627.33264:1735 670.99127:1661 717.46875:134943	12814234	25849752	27098318	3160611	16037000	14533730	18975338	7937259	6220634	20565350	1912149	194.44	194.44	194.44	3371168	5952382	7948520	3136	194.44	2906	3788	194.44	194.44	194.44	194.44	194.44	4815096	19144124	15001737	20687496	7692674	18690554	9945396	21101696	18534028	5626	194.44	194.44	194.44	194.44	194.44	17763466	9164252	23306446	194.44
Phenylacetylglycine	MSMS	C10H11NO3	194.08122:8248842 195.08457:1170713 196.08793:0	54.6291:5022 65.03597:8221 65.03941:162403 69.83362:5380 76.04004:31829 91.05475:1074177 107.04978:7328 125.59901:5971	40778288	98515192	97261704	98826160	96167552	97452312	95856880	97370496	110884344	111408032	110811984	116200944	117019856	118531768	136668752	134988992	86823192	58319016	58435580	58059296	75769872	75378816	75519224	77689424	78036488	78555360	64114788	114004392	114589608	41954964	13583536	51191356	31423000	51326288	52308488	94787616	95391456	94472232	89735824	90153096	90533128	53119988	82783112	48204504	84006336
Phenylglyoxylic acid	MSMS	C8H6O3	149.02344:1282551 150.02679:103516 151.03015:15484	50.01606:1081 51.02391:7682 53.00309:5330 53.03951:9202 53.29551:920 55.01874:1469 65.03945:34027 70.93073:767 77.03927:3197 91.05478:2764 95.04972:16395 103.0544:1046 105.03395:5659 105.04511:4123 111.50822:801 121.0287:1757 121.03986:1425 133.31982:789 149.0233:3256 149.05986:1086	11123332	15730434	21088132	10037654	20334426	5567792	9794215	11302626	8472558	2444922	14560153	7515135	3570733	3969728	2182188	3961308	5876275	7214045	7667333	4641055	4669212	3293354	8108420	2106359	6720278	3858196	6293574	4265072	2723972	1566894	5853190	10909861	5150566	3814158	1929678	10181641	3606856	5197886	4831078	3408360	6970590	7593001	6666665	7574150	4044748
Pipecolic acid	MSMS	C6H11NO2	130.0863:8723028 131.08965:727770 132.09301:13966885	51.72733:2397 52.10612:1978 55.05505:4387 56.05043:3420 58.74146:2127 61.85386:2207 67.04231:11378 68.05022:3683 69.05795:5989 75.43739:2703 78.99769:4638 82.06578:53711 84.08139:231371 85.09019:2602 97.00803:5421 130.0865:7252	55883800	56413280	55817348	56382180	58023608	29705120	57474276	58562404	61739356	29375406	29717584	16481719	6338789	27333492	27720492	27498100	73909576	135640864	33176062	131948992	27516610	27322260	27425990	31316610	138729408	141232160	18733690	10101198	18342168	4139414	11099979	11799925	48073200	48308888	48315328	79242904	79228920	78459416	3194188	3367681	6604592	11143280	11227344	11266705	15955667
Progesterone	MSMS	C21H30O2	313.23505:2541978 314.2384:404448 315.24176:0	54.21967:683 55.05494:1282 55.6053:805 57.03438:2447 57.07074:7735 65.03929:4042 67.05493:3346 69.07058:1642 71.0862:2697 75.77348:827 77.69027:901 81.07042:1565 91.05479:81798 95.08588:2277 121.02853:3135 149.02327:13467 171.22449:887 207.16994:976 209.27554:1138 295.19193:1074 301.49411:1280 313.23495:7197 313.27139:1884	36887756	20243816	47364192	45228112	38179972	36927360	38900780	37759120	11681863	11593833	12028959	7238437	10432938	16057958	13278335	16716326	20326168	17173334	31856238	13026420	33537664	17899044	14645411	2717054	32861096	4905081	31606280	17958394	20308134	11498216	18582800	6731232	37330320	5582660	36356464	36192228	35921720	6059520	31947276	18215364	39578228	20510372	17349380	18139188	40745280
Proline betaine	MSMS	C7H13NO2	144.10188:34623568 145.10523:2626556 146.10859:1156242	51.76614:15348 53.03936:36358 55.01884:19484 55.05503:35757 56.05019:78585 58.06594:858366 68.04995:26560 70.06583:36905 72.08133:31519 72.17175:18726 76.39561:18334 82.06561:30094 84.08125:286407 94.76704:18972 98.09654:19250 144.10156:328785	218612912	220415728	91155976	6760706	227921696	6449216	6626996	6441621	383094112	380340960	380607040	39167936	39010564	38339652	150774576	150680736	148982528	556972864	555456000	550644160	51606492	50315568	50530376	45139840	321534624	323127136	34750476	34533736	24796496	37878676	38368216	37475616	4320771	4214069	4742610	397940640	6475408	6637804	8980310	11730024	11770529	2898330	7137022	25384678	76637952
Prolyl-Cysteine	MSMS	C8H14N2O3S	217.06587:137294 218.06922:20962 219.07258:17861	55.01861:1557 55.05253:1221 55.05506:21103 57.49119:731 57.7564:604 59.04987:3079 62.28477:632 65.03927:1206 65.72015:700 67.05505:1287 67.49774:709 69.03403:2199 77.84499:749 83.0496:9148 99.04449:909 101.06043:1268 111.04417:3321 113.0597:1640 128.06181:1140 129.05415:1420 155.07008:2198 173.08102:1775 217.10545:2903	840612	1289637	517212	575550	878707	576278	1007505	1438716	357270	544445	7624	46203	206907	607271	428275	468338	137219	22748	7853	409121	26119	711840	639621	17035	348731	798447	820287	588405	573998	322826	387823	928150	621207	668929	561299	281732	669516	538416	580751	545341	498000	414193	8137	798687	273850
Propionylcarnitine	MSMS	C9H19N3O3	218.13869:2662552 219.14204:355785 220.1454:208566	52.0613:748 53.03953:956 55.05502:1680 56.05859:811 57.03437:11973 58.06591:1760 59.42221:872 59.71731:781 60.08153:6839 61.4505:822 79.05492:2013 84.08138:3637 85.02898:79221 85.56932:881 91.05499:1988 93.56061:935 96.01101:799 99.04411:813 103.0546:1373 106.06552:2664 107.04935:1345 117.05756:1069 118.06553:2875 119.07292:1036 120.08076:1165 122.06028:2203 131.07297:2149 131.62262:783 132.08128…	25625886	28423358	30276016	29061226	38460380	35346440	34578756	33734764	20287622	19213524	20543906	25464816	10778415	24717042	16771647	8870008	8991179	11567094	26441396	26829300	22701414	22623842	23921148	26848862	1071053	27250812	25231098	15295620	24734778	26788824	16679899	28365812	27854398	26518882	25761212	2138006	25513420	1015458	26171718	13650198	645250368	26254368	664065152	7672244	27279946
Pyridoxal	MSMS	C8H9NO3	168.06544:3688811 169.06879:322719 170.07215:712098	51.02378:4472 53.00304:3685 53.03746:3447 53.03954:48843 63.94307:4864 64.19897:2487 65.03941:52944 67.05503:87554 70.04878:3296 77.03903:2692 79.05486:6908 79.53761:2558 80.9456:11642 81.03431:4316 93.05774:18172 94.06562:71275 95.04982:14073 96.04495:4688 106.06559:7910 116.9664:9561 122.06021:20038 150.05493:52310 168.06435:3936	28324682	29450024	29243536	29761194	100341544	30182804	99381208	31355222	97870976	97279040	31722986	127320392	34202620	31102988	67451712	36742412	36499684	31849544	89765568	31203546	100417192	31179000	99231568	26482250	25458546	26418428	28265334	28275658	28360818	34234480	35214556	35550696	36170528	79408920	36085732	91425152	33498402	32135462	29892600	29872936	29720578	31139268	31334130	30804348	28939834
Pyroglutamic acid	MSMS	C5H7NO3	130.04991:5736604 131.05326:287265 132.05662:72987664	51.72733:2397 52.10612:1978 55.05505:4387 56.05043:3420 58.74146:2127 61.85386:2207 67.04231:11378 68.05022:3683 69.05795:5989 75.43739:2703 78.99769:4638 82.06578:53711 84.08139:231371 85.09019:2602 97.00803:5421 130.0865:7252	40434296	40115892	42573268	43629004	42415108	42810884	43112672	43234196	21567370	21165694	21126506	65866208	67769176	63770584	35281908	34035964	33607612	43728236	43248980	44175048	38939120	38629916	39395612	38826996	39186952	40217192	33379350	33503370	32925544	41378848	23809010	41682440	15708176	15400143	15366643	34596936	34774532	35138364	40940560	41899972	42265888	41751572	41555928	41561976	61070516
Pyruvatoxime	MSMS	C3H5NO3	102.03439:20661122 103.03774:349194 104.0411:420548	56.96575:415373 58.06593:16451 60.95864:24206 67.5106:30765 76.51579:20685 101.92971:14276	178002880	178782464	180247648	198904352	174463376	184765984	182794896	191320080	40604112	49500884	50210508	315930464	305586368	121130528	55934664	55293096	51918248	292324992	287896128	297387488	263385680	271472320	268629408	200203520	203240544	200701072	17711220	18896838	4854810	71092408	64049584	134570032	28596774	30045276	2500804	209244816	212184688	214014624	285314240	276296384	276245984	37492096	54811084	53507764	303032384
Resveratrol	MSMS	C14H12O3	227.08113:2521311 228.08448:384298 229.08784:48975	50.87081:838 55.05501:2015 57.0706:1043 58.05549:958 65.76078:1047 69.07018:1789 81.8283:1108 88.85746:1057 103.0545:6118 111.29779:1340 113.66345:1411 117.05718:4650 127.05437:3243 128.04901:3910 130.06508:5057 135.05397:1192 141.05681:2476 145.06445:14244 146.05983:4840 153.05716:10718 154.06487:126516 155.06018:18094 160.29448:1220 164.10097:1102 170.06052:1317 179.06026:5876 180.06784:5402 18…	16925402	17109742	28057640	17366382	16995894	28175564	17023170	17218790	11533002	11285761	21161000	43520964	68392280	37527984	44685824	43479148	43657052	51768924	52003636	51671336	16974938	27882934	17309688	7812234	7987613	4718109	17479132	17593776	9971219	12586884	19688366	12663574	34279512	34034536	34782088	16478985	28957268	28828902	14501498	23584008	14697956	36132816	36610344	36096016	14493927
Rhodinyl propionate	in silico MSMS	C13H24O2	235.16702:659011 236.17037:236609 237.17373:119065	53.03953:827 55.05498:1223 56.96568:1036 57.07076:12251 58.03203:641 58.57331:683 59.04972:1229 60.64164:700 60.73312:725 63.54917:722 64.37337:682 67.05479:815 69.48354:736 74.9946:634 78.24124:777 79.05474:895 80.41727:669 91.05499:1991 93.07076:1132 95.04947:887 95.08617:1122 105.07043:1407 107.08576:1520 109.10096:990 113.70075:768 119.08551:1507 168.31554:807 179.10629:1830 199.05138:869 204…	4578668	2297636	7251004	4669214	6618250	8364290	7177218	6094912	3629829	1563106	3458789	4606822	2877843	3444998	1467596	3681696	2035854	1703696	4415096	3763902	1948883	1530096	2240168	1396102	1216309	1604963	1853179	5524140	2240829	1203078	1579780	4067220	2011947	1110508	1178478	2435765	1718330	1575242	717133	593819	3319165	4447994	1087401	945900	2610762
Riboflavin	MSMS	C17H20N4O6	377.14542:3691856 378.14877:662429 379.15213:82606	53.03941:4879 57.03232:2006 57.03438:22258 61.02906:11849 61.95633:2568 69.03427:37113 71.01332:8664 71.04977:7263 73.02899:5008 75.04471:8021 81.03411:8341 99.04449:5486 114.53848:3226 135.61377:2632 145.07735:3388 154.64247:2702 170.07047:3616 172.08693:98437 190.09724:3842 198.06619:9098 199.12175:3653 200.08107:14631 216.07663:52346 243.08757:107557 243.11258:5278 244.07158:4067 332.39383:310…	14408900	58512044	57513488	35613496	30559750	53650	57377256	30667050	10693654	9476948	9789633	252999	170246	16047234	197481	394284	12718242	16664696	184123	16708089	16479772	16280867	16853600	16418960	16333611	66341776	31025	54145264	54505044	16991574	65027552	33470580	21872032	51398204	93280728	56626256	56310552	56865120	13515853	52749040	52708868	50397664	50234132	23634756	12851306
Ribosylzeatin phosphate	in silico MSMS	C15H22N5O8P	473.15503:3886834 474.15838:751050 475.16174:72779	50.33311:2175 56.04932:1999 58.74322:1993 84.32095:2397 113.45377:2489 116.69312:2390 121.25815:2426 148.0372:7200 169.028:3430 208.05879:6023 211.03871:5368 226.0686:18507 244.07927:11933 252.06474:38612 270.07529:62819 294.07605:11440 312.08502:12122 354.09653:8092 372.10562:8362 414.58798:2983 437.13589:6072 455.14404:15014 473.15524:167487	19166390	19052842	19038832	18761932	20422830	20441606	19639964	20553944	21513166	21634078	21108110	22768070	23353394	21671788	17085204	16866608	16866262	15790880	15729739	15729460	20664544	20324514	20962890	20761420	20484636	21055494	21622922	21522026	21053914	17816920	17553820	17870772	11836462	11594079	11943104	19403208	19010874	18704654	14804383	14689153	14763338	16623689	16621507	15846198	15629787
Ricinoleic acid	MSMS	C18H34O3	299.25784:733697 300.26119:169714 301.26455:12751	53.0031:1090 55.055:5195 57.0707:12234 58.0198:844 67.05489:6497 69.07041:4395 71.0498:1416 71.08627:6292 79.05474:2122 81.07037:7695 83.08584:1022 85.10178:1169 91.05474:1127 93.07069:1039 95.08595:5031 105.06994:1100 118.11253:981 296.49359:992	3927906	7946986	7722554	2933884	2898919	2630057	2273969	7069528	2578961	182684	3312282	1706805	2184540	971136	167094	107229	89377	73770	100981	184144	82744	5709347	2096400	9281025	9602894	1993273	2336404	8886866	8990320	3005092	6726744	6813244	7634319	7675982	4459088	1645358	7347726	7022339	6987753	7145058	7282510	7537842	4088220	8189276	6591889
Saccharin	MSMS	C7H5NO3S	182.00923:757732 183.01258:337771 184.01594:58055	50.7573:595 53.03934:814 54.04716:528 55.05502:2978 55.94599:2478 57.93562:2163 63.94433:2919 65.03935:3699 71.94099:1580 91.04224:5985 96.00295:1768 103.04208:773 108.00287:1790 109.01099:15096 109.05235:1548 116.97265:839 123.01395:13747 127.99273:1566 135.01352:7336 139.97484:2129 166.98575:33963 182.00882:8258	6650166	11885667	6803272	5990868	12224191	11685373	5643055	12631593	9964039	4562874	5059478	3204309	4863102	5939818	4592252	5374859	1773687	1886067	5458420	6337656	3251229	6751806	1877250	4851523	5987853	6153340	2102180	5757880	5665135	6451684	5513566	4882550	6582601	5526306	6133927	6683166	5881818	5285418	2659033	5667098	4755290	10251338	5719720	5641087	5219720
Safrole	MSMS	C10H10O2	163.07545:1550490 164.0788:163350 165.08216:128431	50.01604:2880 51.02385:14915 53.00315:1059 53.03948:27310 55.01872:793 55.63824:714 57.23438:637 65.03954:814 75.7641:655 77.0392:8285 77.04263:648 79.05498:1182 81.03427:1628 88.2676:582 91.05482:2727 95.0496:50867 105.03392:17373 105.04491:11858 117.05791:1620 118.06557:738	1850965	6271248	6974896	3168656	18240784	12204303	4709986	5998312	1292644	12384896	12520960	14606808	3819288	16741524	15215051	2545740	11043939	12051380	13220451	10512692	4427054	14407003	3717556	15561023	309445	627846	1418405	3580159	353098	2447192	918230	4253088	3607657	5851466	1034497	6090718	6002452	3656715	7923552	6486518	5125316	1125570	456257	2995035	15137000
Senkyunolide A;(-)-Senkyunolide A	in silico MSMS	C12H16O2	193.12238:1667836 194.12573:493498 195.12909:435943	53.00311:2155 53.03954:649 55.01862:712 55.05495:1040 57.07077:13804 57.23808:718 60.83819:677 64.71696:780 65.03936:2170 67.0548:2468 74.09549:713 79.05496:3097 81.07051:991 91.05483:7463 94.04156:1914 95.0499:1376 105.07001:1402 107.04932:2171 109.06505:2724 121.06455:2130 134.51326:840 137.05965:1702 149.20226:773 176.07704:770 193.12242:3781	23276782	23606104	24829894	23461712	23443408	25008952	26165638	24324178	6472506	14641337	7527454	15462336	12293517	13384001	11669475	13494890	8015312	15870343	17827640	19123496	19501958	20411180	19667506	20031088	21115220	21365448	10334377	20103742	22030150	20425394	21673846	21786906	20978938	19457210	21877622	20477024	20498948	21277468	21469136	22306176	22824290	10376870	10548694	20725418	22804372
Serylvaline	MSMS	C8H16N2O4	203.10658:833193 204.10993:131370 205.11329:126586	51.02364:560 53.03936:2251 55.01859:2332 55.05492:1302 56.25118:628 61.33122:687 63.71251:649 65.03945:1466 67.05499:984 70.94273:823 77.31726:774 79.05496:5905 87.06345:667 91.05484:11508 93.07059:1427 95.04941:2534 103.05473:3148 105.04547:1012 105.07035:11944 108.14133:670 115.05445:4911 117.07008:4910 118.0778:1395 119.08602:1606 121.06457:4264 128.06206:4071 129.0701:2106 131.04933:5705 132.…	6198256	11967654	11831681	12352720	13784150	12297331	7408420	6119306	968298	1021548	1612133	3639098	2376116	663749	681576	478471	2807028	6063506	680108	5340184	7615768	13810072	8072480	14721701	7972844	973133	4686791	1863031	4207847	4028918	6614428	3339322	5549070	1830004	4282354	16663375	3911916	7832254	16439514	17565350	8127252	5616934	4328759	2473371	9976084
Solavetivone	in silico MSMS	C15H22O	219.17424:2116146 220.17759:433446 221.18095:68825	53.00306:2959 55.055:3778 57.0707:21654 57.52192:834 59.35263:823 59.50211:850 64.20637:911 65.03955:1100 65.68379:830 67.05486:1248 67.7317:925 76.76489:1022 79.05471:4742 91.05473:8005 93.06937:891 95.0492:1509 103.05409:1360 105.07032:6568 115.05423:1223 117.06988:2064 119.08578:4966 121.06484:1116 121.10145:1463 129.07004:2834 131.08521:2806 133.101:1319 145.1022:1452 161.07875:1353 163.11182…	29226316	30544994	35141600	34973756	32861114	32688492	17398474	19664708	20633742	12403021	11075817	11307522	12550986	22952554	23633108	13092040	14028352	25173208	25161140	26267074	14600045	27241336	28072928	17875282	27105262	13708145	28954112	16861794	13275640	15723818	16296576	15853529	31025410	17667014	15540622	29618482	28898328	29136724	29585066	29567610	30684584	16802802	30029852	31209906	32116312
Spermidine	MSMS	C7H19N3	144.17477:695613 145.17812:59323 146.18148:0	53.00311:910 56.96291:936 56.96569:9185 57.07057:713 71.95259:1717 84.9604:1279 88.11264:708 97.00813:1460 102.63794:622 115.05412:811 138.924:714 144.08116:627 144.17479:2017	6285290	10843765	9486858	6535454	6869776	7114446	11229813	8517982	554639	486839	147083	22876076	24741024	25706594	1577402	555447	24202	8961114	8887577	14962494	13494982	12586494	2693396	14398964	14234728	16298199	897959	1187119	817768	4110798	1337981	23562	23858	1669376	15586	19994406	14962478	4349785	13704	23970272	143429	2372307	269223	1914791	17788078
Sphinganine	MSMS	C18H39NO2	302.30563:1968058 303.30898:371881 304.31234:36368	53.00313:1173 55.05497:818 57.06833:931 57.0708:15859 59.45178:965 68.05014:1060 70.06246:1725 70.06593:23394 71.0862:3382 82.59504:836 88.07632:15821 102.09165:3731 106.08648:3819 192.49046:953 284.29477:1469 302.30551:39805	12960224	12920461	12764204	12792736	12992931	13129401	1002982	12783687	4662046	4559596	4556543	30442992	30765490	30145120	4406983	4201118	4164494	20318596	20234122	20202598	22984888	22884814	22977892	31606736	31681634	31599976	4035010	3913317	3839517	4112614	4052934	3748242	3840483	3938494	3819775	27418598	27958126	27206678	28045960	27444150	28137712	3751943	3830003	3730004	27118194
Stigmasteryl glucoside	MSMS	C38H56O4	575.42865:933402 576.432:330384 577.43536:2676340	57.07077:7630 60.44859:1062 67.05496:3472 68.19486:1222 69.07056:3428 70.53405:1019 71.04983:4925 71.08622:4639 72.09013:1231 73.97544:1126 81.07039:3299 82.27498:1352 83.08583:2857 85.10181:1162 94.81351:1351 95.08605:4469 97.1011:1448 99.08084:4394 105.32044:1183 109.10163:3673 111.11716:1290 127.11179:4361 129.56613:1261 135.11693:2483 155.71465:1696 173.72345:1245 187.84271:1334 271.19022:307…	327.343	327.343	2576910	598433	32192	24869	137656	176288	34182	26515	54575	40921	49366	18767	18718	28382	10936	29251	58761	47300	25584	36513	15526	45722	14636	68633	59330	13799	8072	3486	3950	3513	3369	327.343	3273	4122	9733	38631	115807	114941	2927795	3170325	8361836	124391	2590791
Tartaric acid	MSMS	C4H6O6	149.02324:25552176 150.02659:2235253 151.02995:286672	53.00297:55776 65.0394:546848 76.5968:15873 87.06022:16247 94.25399:17187 121.0284:23786 149.02351:57103	474429952	464983680	472463968	475928576	495080640	501719456	503322752	500285184	1987523	17548876	2069622	2823144	447149440	2250251	3442680	259891136	1234409	2706485	1871807	3646988	1924169	435540960	447268224	449759776	454863200	452371968	185244416	465038112	460128064	426925760	452707712	436228992	453487072	273785056	447033312	454316640	451055936	443149856	454124000	469112032	474675392	430734208	442356992	450991264	449179872
Tetracosahexaenoic acid	MSMS	C24H36O2	355.26318:1086712 356.26653:286554 357.26989:65654	55.05503:4496 57.07104:1204 62.42266:1007 63.14139:826 67.05491:4420 69.07066:1573 73.64703:793 79.05486:5126 81.07052:7778 83.0862:3272 85.06521:2222 91.05463:4305 93.03695:2769 93.07037:8501 95.08598:8000 99.0443:1202 101.06046:2067 105.07021:11229 107.0858:8620 109.06507:1338 109.10136:3024 117.07024:1911 119.08572:10137 121.10151:3299 129.06992:2174 131.08575:5599 133.10124:6407 135.08044:973…	8987468	9149193	9021370	9568208	9155745	9187033	9251280	9749527	9573610	9802325	10273383	8180728	8482126	8461163	9394979	9108373	8725392	5558928	5771124	6015416	8579812	8543093	8607504	8132014	8921592	9220345	11241682	11141008	10712030	12325358	11766450	11340242	12463990	12257039	12641619	13496153	13319352	12885564	8637759	8920888	8452942	8957933	9024036	9071096	7292587
Tetradecanedioic acid	MSMS	C14H26O4	259.19031:1422054 260.19366:206925 261.19702:25791	53.003:1353 55.05249:1158 55.05511:17702 55.63407:707 57.07075:5462 59.05:11985 67.05491:1143 69.07062:50713 71.08667:1019 73.06538:4479 79.2738:758 81.0705:1114 83.04982:7890 83.08597:1414 87.08094:1438 91.18641:1120 97.06521:2896 97.1018:1262 101.0601:6694 105.67291:846 111.04423:1851 111.11711:12823 115.07536:2591 127.21868:903 129.05443:1033 139.11176:1416 143.53227:902 157.12216:1665 213.147…	15687778	14423856	27487052	12266032	27551412	14441624	14514129	9902661	3153860	17008502	28395330	2691231	11135818	11377691	14392777	14101732	4118780	17207374	9201465	9343028	17990724	10039124	18535308	9366091	8556824	8217978	20354902	37193720	38031544	33698792	22790484	13081822	16533913	16464987	17212794	6071914	2756503	9280622	5186430	4289367	16836610	19032072	18672522	32413712	18310834
Tetrahydrocorticosterone	MSMS	C21H34O4	351.25153:2682608 352.25488:110551 353.25824:0	69.07066:20854 74.36845:2181 75.90452:2590 79.05481:11060 96.08128:35161 113.1077:6430 114.09149:93404 190.49103:3067 209.16513:4084 220.14996:6306 342.24277:3367 351.246:18093	9271197	12102658	13357407	14693606	11674993	11708046	16839176	15610960	8459697	7361788	7397246	2282	2182	2446	9609464	10014408	11999071	154.135	2276	2087	2033	2441	5551	2661	2356	3589	12843697	5711798	19817596	13790165	18210524	18064156	10566601	21641200	12584980	1943	2267	1982	154.135	2312	1935	9132370	25344324	20708118	2043
Theaspirane	in silico MSMS	C13H22O	195.17424:750389 196.17759:200261 197.18095:112948	50.72483:616 53.00304:1011 55.05497:2778 55.84454:630 57.07072:14618 58.32698:655 58.96834:695 61.02011:580 62.86731:598 67.05473:1387 69.03416:1319 71.94074:3487 79.05481:1297 81.07078:1321 83.04955:2794 91.05466:2252 95.04936:1551 105.07005:998 109.06496:6782 124.08817:1281 139.11192:5985 167.76392:813 195.17398:1490	10984047	11384416	12255884	11835427	7019940	11679149	12406519	12816850	3882737	6157162	4985524	4822662	3130953	9409405	3920660	3947538	4672772	5012916	6174176	4680024	4074549	5657128	2052946	5377873	10171762	5508715	5558222	9848545	5378552	3819046	9820382	11426078	5342871	7168310	11487991	1719470	5862588	5544408	3515717	5669002	9887531	1354164	1427767	7296752	6721264
Theobromine	MSMS	C7H8N4O2	179.06386:732067 180.06721:75990 181.07057:57247	51.94083:1650 53.03943:1538 55.93518:2661 58.49115:706 59.04998:999 60.5864:684 62.65711:721 64.54089:661 65.03954:3494 67.05508:1549 67.93565:3802 68.94343:2208 76.88489:711 78.01837:671 79.05496:5696 88.02248:997 91.04227:2056 91.05466:1942 95.04955:1931 96.00339:3633 108.00328:10812 109.01103:4288 113.00957:826 117.3741:775 118.94368:677 119.9516:866 121.06573:717 122.07283:1502 123.01401:2542…	6157136	10656762	766805	2562416	6638448	6980320	6535198	5950796	2025858	2428684	2821364	1239993	912943	1119474	1372821	1106722	2946042	1816230	864933	1137427	1094360	2100618	1905084	1343452	607438	1522961	1358365	2818325	1305668	1061380	6421748	2405578	2282548	1227616	1118015	1942877	2138950	1402473	4643574	3237430	2631954	3547285	2566798	4738953	5563401
Thymol	MSMS	C10H14O	149.11723:286892 150.12058:239772 151.12394:294440	51.0238:1339 53.00316:5398 53.03935:2006 53.62537:635 54.47692:585 54.56531:592 55.01865:766 55.93517:734 60.04183:520 65.03947:26691 70.93057:658 71.06073:652 71.93018:3626 72.93785:4003 77.03917:800 82.87471:620 90.94805:1696 91.05476:2344 93.07007:620 95.04949:2818 97.46066:667 111.04441:1062 121.02863:2074 121.03988:973 125.96073:1359 149.02344:3303	468413	617758	324830	997429	2798757	233745	520709	845819	480686	199931	300379	849711	1866572	1361837	247651	195857	644627	987614	1035855	1183052	449411	1372022	2194714	1597678	1455945	1356627	125922	445697	302180	575046	206947	232218	240356	185591	228401	1326844	2244145	3610458	1290748	2400072	887776	214636	147658	180560	491757
trans-1,2-Dihydrobenzene-1,2-diol	MSMS	C6H8O2	113.05995:2450059 114.0633:267915 115.06666:259134	50.65226:626 53.00304:2083 54.93836:1151 55.01873:20403 60.93118:1028 61.92868:4087 68.87627:717 71.94086:2104 87.84209:816	36664860	35536772	38424432	36307096	1664740	20037164	3581516	38511132	423241	354297	560640	16039860	5686536	17089850	724058	293468	344817	9419318	9932894	6686058	2773417	10159131	75531784	86744168	84059672	82296344	197426	465908	126650	269769	214682	195526	462987	171049	188993	81028912	84587208	86133048	101269832	103624096	102839152	222438	184056	187901	101012656
Triethyl citrate	MSMS	C14H18O7	299.11008:1523338 300.11343:191525 301.11679:220894	53.03952:743 57.19355:769 62.72369:757 78.09737:798 99.81331:912 249.64082:826 299.10977:4635	16643972	17827594	17806546	18337788	398381	18170106	17915938	18297162	15344190	17622688	9254455	18082158	17376998	17756972	16048279	9163178	15721360	16019206	9181784	16654369	17578930	16942572	17980696	19176778	11058772	18320282	315274	11459506	16774226	318401	19761688	19202432	371421	18103484	18686178	377158	174904	16202782	17038972	16310504	17985364	16824360	16631455	8345803	18064262
Triethylamine	in silico MSMS	C6H15N	102.12807:1753145 103.13142:136565 104.13478:45727	50.60456:550 56.05019:617 56.96568:3968 57.03426:736 58.06599:40178 60.04515:607 72.08137:2279 74.09718:5446 76.51569:905 81.46754:710 81.53503:652 82.97309:563 97.00839:1293 102.12814:13843	19815900	15140066	16131576	17682602	17683070	16952028	16800166	17223984	10974440	14928643	13460863	15471084	19360958	19741594	2024560	7486475	14318929	15783317	16578782	16370212	16446492	14749174	16644644	19263456	17505042	15906870	15159294	14803535	15719973	14903073	11943422	14626292	15358225	15895778	17315336	16849964	5647812	16545237	16198041	15563313	18247782	16383535	8480158	14161101	14712921
Troxerutin	in silico MSMS	C33H42O19	707.2215:24235944 708.22485:6219316 709.22821:1815913	55.51939:12597 75.40247:16509 129.46686:16890 144.82085:19446 279.85709:16383 347.09705:20350 365.10544:6292472 403.52826:16990 451.59967:23228 664.02466:19838 692.76727:19108 707.22125:111064	118791504	115965800	103799216	102883712	104012968	100410304	94468920	91548592	27478982	27229380	26146700	138265632	137980448	123551696	52635744	54718328	51537764	168476016	160006832	152265216	126797400	124499584	125117880	127525744	128919472	130165440	66628972	67266200	66675728	165606704	165871504	170874960	109498056	108431752	113061504	112034576	112857640	108950552	207302832	210101824	204033856	69544464	69986192	73145712	40345216
Tryptophyl-Isoleucine	MSMS	C17H23N3O3	318.18118:743872 319.18453:89400 320.18789:0	59.20884:705 62.8246:898 67.05521:1083 85.19298:907 86.09702:13179 96.23695:897 107.73648:864 117.52223:942 118.06525:4181 130.06499:2275 132.08069:6054 142.06483:2454 144.08084:3616 146.05994:13686 159.0918:4966 170.06036:2324 188.07056:6994 205.09755:2167 262.14398:1723 318.18118:1855	3807678	4834174	1881253	4595077	3254862	4097120	722338	2877570	1439816	3454809	767444	8879957	8934999	1836121	911639	4107455	1537099	5020016	4083069	1767939	5984673	5954412	998733	7309116	2953437	4877602	5186276	8300224	4214784	6677080	5673126	3456664	491044	2021325	9568650	6560996	6550506	4536903	87976256	5625582	4755194	4048796	5095089	3440091	2274201
Uracil	MSMS	C4H4N2O2	113.03491:5771428 114.03826:354674 115.04162:244252	52.01905:5066 53.00311:22137 53.99834:4572 64.13174:4154 64.14326:3389 68.01387:9807 69.99289:4619 70.02964:43974 71.9411:4614 77.25478:3908 96.00867:24266 113.03485:22578	74688456	75827832	77024600	80297792	75060744	75914288	78270880	79626000	74220112	71710560	72284928	56730216	52321812	2305606	79149728	78618688	79031456	72831512	1306671	7782870	65822392	65962180	65669404	54726156	55261340	54433656	98958304	98692384	100998520	61352348	61501204	62140708	174919824	171742320	91879416	55507172	55500036	56338980	72164288	72659808	73033544	66257320	64307744	65450332	99466504
Ureidoisobutyric acid	MSMS	C5H10N2O3	145.04945:12185116 146.0528:926527 147.05616:335093	53.03948:17733 55.01864:31252 57.03432:18604 67.91486:9065 69.03401:14286 84.08188:8857 85.02903:16483 102.1131:9783	91996008	93945664	86627992	85591992	85706824	85425688	81920976	81967736	12785125	13973150	965097	16334205	16356300	1980891	8668865	8660414	57052744	3808633	11064340	11922822	12589093	5719304	6727928	12557291	91092248	93494040	61908724	62419528	60625352	106398256	106236144	112124376	607473	90450088	89492040	89105864	88673440	89884816	139048288	140196592	138035504	62548332	63626764	64168516	41179400
Ureidosuccinic acid	MSMS	C5H8N2O5	177.0508:1024252 178.05415:169954 179.05751:189893	51.3295:625 53.0031:916 53.03944:879 55.05491:757 55.93284:1095 55.93535:15709 56.96565:1110 59.04993:2835 60.2369:597 60.94966:730 62.31604:736 65.03944:7675 71.20464:684 71.93013:6732 72.93415:1163 72.93794:15503 74.02447:11797 79.05489:1816 88.04006:6729 90.94828:7298 91.05477:4527 97.00808:2160 103.40315:872 108.95863:2751 115.05448:1575 116.06248:1087 116.96667:1275 125.96136:1300 146.96161:…	7036905	7050420	7125782	7074044	7110662	7580542	6964740	7196368	3897700	3728592	3791378	10252542	10293208	10030489	3177180	3354292	3298986	8377585	8490146	8314100	7205318	7399436	7080620	6833410	6777086	6640882	6096278	6028666	6277854	7997944	8036058	8014148	2522269	2481941	2534098	5514389	5476213	5381516	8073670	7906060	8162734	7319380	7424378	7442238	9791508
Uric acid	MSMS	C5H4N4O3	169.03552:74424912 170.03887:5233960 171.04223:465314	52.02243:24793 55.03001:285237 56.53304:21732 58.5924:22623 58.62208:23539 63.79831:23658 69.0091:157830 69.99292:32501 70.04083:132923 95.09233:25022 96.01966:123139 98.03545:35521 103.62218:24589 116.23892:28604 124.01373:34690 124.80389:32124 125.13834:27571 126.0298:88516 141.0403:31217 147.67845:28221 169.03564:81130	459039872	465968768	470188544	493225248	458354400	463793184	465979456	469458592	191335136	156485728	171836112	577562688	590606784	592982720	355047360	357961472	352034656	5530198	5416984	5364637	470726592	4951568	4835008	4531844	461943392	458766176	470519872	470862880	472125856	499448672	504829888	505297280	373560384	374765728	374963808	568016704	563647616	564395712	461642592	459473312	464549984	454210848	454965504	451841920	601513088
Uridine	MSMS	C9H12N2O6	245.07701:1324817 246.08036:98748 247.08372:0	51.75856:718 53.00304:1060 55.01876:1722 57.03436:3652 57.5935:875 57.64718:776 64.24129:683 69.03422:2732 70.02956:20290 70.06586:1563 71.01349:2245 73.02921:863 85.02887:1899 87.04464:946 95.0247:1240 96.00851:15391 97.0079:811 97.02924:956 113.03494:28117 177.02383:858	9203236	17766214	11374129	18649938	15682969	6603915	7058728	11775237	5384188	9754958	10111910	12684634	11588390	13515385	12285264	12544183	12157864	15011603	16558733	17132210	15257391	16003995	15851423	11883683	16458	7124928	22645070	10640844	22905538	13168667	12798186	13967299	10611773	8259172	9344650	10911670	12338324	72180	17384858	16973776	17491490	14701387	14664640	14681912	12574714
Vanilpyruvic acid	MSMS	C10H10O5	209.05559:1134053 210.05894:100386 211.0623:41726	53.00304:1721 53.03944:2042 54.03217:820 54.0347:12776 55.0187:14514 55.055:1720 59.24782:689 59.58696:684 65.03939:13579 66.78032:698 67.04215:1533 67.05472:926 68.01386:6672 68.0501:2887 72.93784:908 75.02361:1037 79.05475:1443 80.04999:3977 81.95828:731 82.02935:2001 87.27355:739 92.05006:4335 93.03387:1183 95.04973:1060 96.04477:2055 97.00883:1196 100.0397:15660 107.86378:797 120.0442:1819 12…	7158846	7285168	7239981	7480718	7810423	7529966	8012211	7506782	3377720	5636743	5662500	7407534	7293794	7634306	7486380	7444870	7262404	8597710	8530575	8717633	8658545	8748774	5072324	7467540	3849350	7449299	7105313	6972907	7109830	8049046	7726296	8251230	5743572	5627029	5718476	6856422	7010110	6664868	7168834	7256556	7591034	6946552	6935150	6986554	6952438
Vinylacetylglycine	MSMS	C6H9NO3	144.06564:258139 145.06899:439210 146.07235:59978	55.05507:2040 56.0503:2010 56.81822:914 56.96579:11823 57.05811:1710 57.93569:1336 58.06606:1228 67.05501:1589 68.05025:6547 70.06599:51476 71.95264:3119 75.8336:1381 77.81236:1088 82.06577:1249 83.07349:1307 84.96025:2709 93.15449:1108 93.19373:1064 96.08163:1144 97.00819:2510 98.097:35732 144.10182:3317	224875	204723	329500	443315	275984	2422508	2648319	254321	249485	171472	116302	11149094	11573307	11362038	161335	114682	145576	10575955	296880	10915712	128936	271999	228706	12028378	11678742	11451388	121836	245295	260288	284100	237428	175260	595821	173901	143420	13478904	13525927	13002403	12076720	13057656	11721885	177999	220016	208715	12340375
5-hydroxyculmorin	MSMS	C15H26O3	219.17421:2020836 220.17756:367021 221.18092:45124	52.50801:921 53.003:1323 55.01883:1067 55.05497:4275 55.87868:996 56.1445:855 57.06824:1591 57.07076:19899 67.05505:1322 79.0549:4144 81.07048:1103 91.05484:7851 93.07014:2323 95.04928:1404 105.0704:7578 107.08578:1186 115.05428:1941 117.07016:2207 119.08562:4973 122.08431:1318 123.08128:1251 129.06989:1727 131.08556:5147 133.10118:2227 145.06456:1303 145.1012:1687 163.1114:1989 173.09642:2251 21…	26894926	27094438	29761676	29920516	27606926	27591684	14516008	28079202	1377292	11395795	10085872	10243059	9865483	1543953	1602166	22184260	13028491	22186704	23799118	14575693	12053438	23769336	24069272	15920094	24063016	11951030	25193566	14808628	11941491	13833272	14651575	14730963	27187582	15362329	13559438	27320208	25666324	25818622	26024152	25692076	26591258	25754820	26685720	26326536	27663378
Kojic Acid	MSMS	C6H6O4	143.03954:833499 144.04289:30555 145.04625:180602	54.06385:2182 56.96562:3765 57.49537:2027 57.83965:2206 59.93099:2165 60.98727:8280 67.06609:2249 78.99776:21417 82.59324:2214 97.00208:4173 97.00804:70000 125.88689:2451	7777229	3062575	5168213	4546840	6139860	7850028	6801384	3789844	2466273	5064195	2469931	2731660	5426732	1532367	1839027	2352750	4435048	5329420	2491237	1890341	4055985	4037847	1339762	2262199	2074266	6114022	2471945	2894907	2763478	2017950	1596426	900765	2669435	1274073	3473843	2937881	2693082	6903970	3710462	1956173	8215635	3925018	6602334	5770155	5375576
Apicidin	MS	C34H49N5O6	624.375:58653 625.37835:53162 626.38171:0		25430	27533	11569	36140	23750	207.14	15391	13072	13162	16848	9658	207.14	207.14	207.14	207.14	32496	19107	207.14	207.14	207.14	207.14	207.14	2071	207.14	207.14	207.14	13345	25263	24049	75589	59314	89084	25730	58510	11107	207.14	207.14	207.14	207.14	207.14	207.14	14923	20695	13449	207.14
Beauvericin	MS	C45H57N3O9	801.45447:78875 802.45782:20423 803.46118:0		170755	204394	85635	209594	235596	205331	12215	26796	57977	138792	46197	161229	196612	330132	16126	6835	4033	10974	17010	11305	15394	51754	29418	4254	22532	5842	26408	156606	58409	6178	96210	78991	419690	240916	463033	53965	58995	23616	3628	41955	11071	10688	12629	10566	26924
Bovinocidin (3-Nitropropionic Acid)	MS	C3H5NO4	157.98842:186452736 158.99177:30902330 159.99513:2348388		1294690	1878479	1514520	1384106	730860	1445526	1057349	687539	53575972	48974232	52575540	44392380	39528752	581348	39664720	38350512	43263284	42894296	37151732	48439320	53727208	54783796	128342432	149885040	205970640	251547184	248521440	257835040	91326784	43089744	41405572	43899004	1102144	1574081	845271	71484888	202018848	342694528	66996272	181335808	50126304	52179136	104298200	56366772	1086769408
cyclopenin	MS	C17H14N2O3	317.08707:183698 318.09042:0 319.09378:0		186503	248386	96889	234132	253631	309966	449461	578153	134462	71565	69204	18750	72952	101885	8809	109494	32125	162267	339823	427111	221758	166328	47265	95822	30447	89226	16095	63565	36475	221983	371550	157000	82090	55976	182477	21370	64378	89853	503378	788213	340233	155194	289693	92037	278041
Emodin	MS	C15H10O5	288.25238:278423 289.25573:38815 290.25909:0		158970	1817864	155755	1752992	139299	1718611	102789	122753	1379385	1314901	1302254	1977841	1990200	1064014	1145910	1187399	1125012	1537792	1570266	1684049	952956	1601806	714626	1730307	1728408	1683036	97894	1248138	1200946	95746	1203822	1229481	600750	572705	1205651	153075	771023	1667958	146913	166551	185360	92792	1252426	78915	844262
Mycophenolic acid	MS	C17H20O6	321.13333:144882 322.13668:637243 323.14004:73684		102114	97776	124586	189144	226089	119216	78659	90996	187337	268858	238756	535878	529552	164460	129719	99920	22639	12524	75162	17659	182045	181070	176851	452278	305033	200600	391281	442887	174564	151033	45465	23370	1087.61	1087.61	19378	69526	22521	74776	217066	102484	149697	270080	205498	208394	72970
Quinoxaline	MS	C8H6N2	131.0564:394527 132.05975:0 133.06311:61508		1758630	1824532	1831160	1939725	1120783	1922346	1937117	1849493	974878	2100948	1171208	1290526	546588	1616066	1332875	948875	1119563	588402	1151948	1460344	2219657	2227112	1181747	1167175	1908543	1018915	536382	1811910	1709210	1917167	1825967	2101966	1487350	1018472	2220206	1493687	1214000	1311508	1626128	2362340	2231697	1302016	1618154	1090501	1990264
Tentoxin	MS	C22H30N4O4	415.23468:333677 416.23803:86041 417.24139:0		378203	506251	346813	370762	349282	283752	269665	267031	84420	173511	167827	534402	353135	303405	29876	19598	17034	37473	39407	26395	73507	157264	84319	261856	133054	258904	130728	74993	170420	26194	78548	26427	167010	165632	199880	103408	109210	44075	44653	51252	33077	74724	83735	79187	52339
w/o MS2:(-)-Dihydrocarveol_BMDB0063680_ms_ms_108383	MS	C10H18O	357.08923:74120 358.09258:19791 359.09594:23414		118426	118191	144353	79783	95266	50663	120767	96057	322.324	322.324	322.324	115841	169894	83609	322.324	4362	322.324	107717	68763	247957	211110	169928	170747	307654	117295	240899	322.324	322.324	322.324	322.324	322.324	322.324	322.324	322.324	322.324	292622	289829	293673	89805	61124	168576	3394	322.324	322.324	450314
w/o MS2:(??)-2-Heptanol_BMDB0033908_ms_ms_10891	MS	C7H16O	117.13899:148839 118.14234:56703 119.1457:0		81459	56272	113508	49934	101797	76041	52516	74241	37601	42791	26399	51268	11592	30957	41006	29881	65430	19453	166705	71604	40301	47507	39168	47481	43635	62317	74777	62974	38027	50243	84318	61910	40088	46845	44820	20410	25608	207805	33534	37085	47962	18618	89096	51005	112323
w/o MS2:(+)-(S)-Carvone_BMDB0004487_ms_ms_179207	MS	C10H14O	151.1115:838075 152.11485:134951 153.11821:406368		6086554	8974846	6224058	5129762	1804800	5924638	1455230	5810010	2950492	1963851	1624521	3016476	1843149	1478768	3264174	1635270	2145523	4999114	1400773	2298192	4032466	1617490	906101	3212271	1685787	5806927	4198862	2838297	914165	1901861	3599044	2021971	1449942	1565526	2607558	1855091	4589138	3061528	1465595	1396983	1225255	8719139	3290001	4423980	2103740
w/o MS2:(+)-12-Methyltetradecanoic acid_BMDB0062089_ms_ms_931425	MS	C15H30O2	241.2274:271610 242.23075:56518 243.23411:0		2697289	1887136	1808027	2344995	2802381	3441618	1792662	1904785	932262	1280342	663384	1179577	1745206	819978	1110857	841678	1138770	1291054	571319	630695	641555	644054	880054	1238827	576402	912574	1126158	628621	2401733	474227	1207453	387528	1025735	2263783	1402269	1028854	672452	1071839	1140257	1279698	721129	1577282	1610424	977819	523660
w/o MS2:(+)-Limonene_BMDB0004321_ms_ms_293778	MS	C10H16	137.11513:438628 138.11848:69267 139.12184:97461		1440086	1985856	844022	266370	2416492	1201674	1179961	1195717	1358867	1055017	1196687	2699653	728246	1149337	807855	454771	621834	668167	1371790	1171570	2092440	2154454	1682073	1288885	938167	2279036	809282	1580046	949476	626565	438591	1256607	466137	1395804	1059815	2267164	2471720	2028216	1703898	3005518	314679	1127632	560177	627502	2679981
w/o MS2:(13E)-11a-Hydroxy-9,15-dioxoprost-13-enoic acid_BMDB0001320_ms_ms_312411	MS	C20H32O5	353.21228:217286 354.21563:34321 355.21899:15614		38952	127307	73461	104395	26975	32408	30450	62890	23077	707909	1103209	244463	283271	221419	17421	27905	23329	54102	44133	63748	109970	157515	134744	158475	655979	236037	490883	693167	994770	9676	19980	12805	998058	2028399	2183183	294829	140440	107825	185426	125913	223820	34980	50316	22648	105154
w/o MS2:(2,6-dihydroxy-4-{4-hydroxy-7-methyl-11-oxo-2,8-dioxatricyclo[7.3.1.0???,????]trideca-1(12),3,5(13),6,9-pentaen-3-yl}phenoxy)dihydroxyoxo-?????-sulfanylium_BMDB0096250_ms_ms_1236682	MS	C18H12O10S	421.03275:136996 422.0361:0 423.03946:0		141.52	141.52	141.52	191669	141.52	2273	190346	136668	62781	141.52	141.52	141.52	141.52	141.52	141.52	141.52	141.52	141.52	141.52	141.52	135396	1613	141.52	141.52	141.52	117233	141.52	141.52	141.52	239581	116165	141.52	141.52	141.52	141.52	141.52	141.52	141.52	131581	141.52	141.52	141.52	141.52	141.52	141.52
w/o MS2:(22Alpha)-hydroxy-campest-4-en-3-one_BMDB0012113_ms_ms_307307	MS	C28H46O2	415.35281:98021 416.35616:47262 417.35952:0		247911	234966	254556	262837	316530	263384	301311	331086	224847	132438	83849	71620	37525	52984	115281	39464	83549	93609	260689	153334	278977	128628	94609	188206	263308	256916	82855	123919	87473	246168	129384	136479	252804	238103	353149	81720	157911	103674	91646	85235	112467	186324	136183	137515	134732
w/o MS2:(23S)-23,25-dihdroxy-24-oxovitamine D3 23-(beta-glucuronide)_BMDB0010361_ms_ms_124324	MS	C33H50O10	605.32501:80043 606.32836:24458 607.33172:0		182713	121090	91948	81451	154582	119604	165099	148720	4418	18686	3833	318080	430997	175380	4474	5704	13763	71481	91306	87611	169950	129718	205685	47963	48662	130772	83689	80235	53659	197071	207192	211006	8987	11414	8725	78592	85753	87346	63462	117784	55829	98292	65318	42965	152174
w/o MS2:(24R)-Cholest-5-ene-3-beta,7-alpha,24-triol_BMDB0011644_ms_ms_313251	MS	C27H46O3	419.32919:8882413 420.33254:1533363 421.3359:0		876879	662890	2206619	2480234	2102762	645490	2993181	994577	536490	40851556	1421178	628993	462936	500390	902310	878290	808551	753713	602880	1308624	469147	548499	631317	1181318	879642	1264784	1658856	1018042	2061971	2580946	2826482	2511936	1028355	1327588	1577099	659215	878812	582727	340612	1062603	589490	2509172	1680433	2583672	714686
w/o MS2:(3a,5b,7a,12a)-24-[(carboxymethyl)amino]-1,12-dihydroxy-24-oxocholan-3-yl-b-D-Glucopyranosiduronic acid_BMDB0109587_ms_ms_116740	MS	C32H51NO12	640.31818:1883285 641.32153:635228 642.32489:146597		13751847	13948100	13605778	12333816	14550218	14446016	14095835	14001384	238.779	3430	2871	46397616	46132964	44627896	238.779	2624	2568	23936480	22963634	23218636	32810886	32545650	33067420	23288	38142184	39192448	3682	4083	238.779	238.779	3698	238.779	238.779	2874	238.779	38307996	38228492	37810496	38102632	38134060	37857144	2522	238.779	4820	33493390
w/o MS2:(3a,5b,7a)-23-Carboxy-7-hydroxy-24-norcholan-3-yl-b-D-Glucopyranosiduronic acid_BMDB0002430_ms_ms_317483	MS	C30H48O10	569.34717:34659 570.35052:0 571.35388:0		204.758	3422	204.758	204.758	3248	204.758	3926	204.758	2186	204.758	2854	49797	204.758	46746	5014	204.758	204.758	25840	204.758	3142	204.758	204.758	3981	204.758	53376	2479	204.758	204.758	204.758	3807	2617	5401	204.758	204.758	2245	204.758	3358	31772	204.758	4603	204.758	2663	204.758	4332	2141
w/o MS2:(3R,3'R,6'R,9-cis)-Carotene-3,3'-diol_BMDB0002198_ms_ms_1310947	MS	C40H56O2	569.43335:1158184 570.4367:504731 571.44006:106129		138.276	138.276	101627	47464	138.276	138.276	27393	53575	236572	202543	3002802	125654	243458	25521	138.276	298035	146718	20069	144874	38827	14758	15133	152303	23186	138.276	52154	149791	21805	60760	52132	75568	55092	138.276	138.276	210082	197814	22804	1937	18017	28694	138.276	68553	2609	138.276	138.276
w/o MS2:(3S)-3-Hydroxyadipyl-CoA_BMDB0109596_ms_ms_365935	MS	C27H44N7O20P3S	910.17377:132747 911.17712:0 912.18048:0		278.003	63822	278.003	107274	44501	278.003	4099	3758	27361	278.003	278.003	3774	188278	278.003	4127	19483	4290	278.003	278.003	4194	205059	278.003	278.003	4156	2959	17891	278.003	278.003	18828	19059	278.003	278.003	176962	278.003	106262	278.003	12822	278.003	278.003	278.003	29345	278.003	278.003	53030	78121
w/o MS2:(E)-2-Nonen-1-ol_BMDB0063696_ms_ms_119402	MS	C9H18O	141.11288:162346 142.11623:29973 143.11959:40585		152065	718999	394426	397133	882218	431951	580973	782786	251003	733998	485644	553518	490211	433240	314929	423112	562869	203563	382738	255657	359303	248636	321537	295236	384946	93216	284387	685828	463833	208422	482711	82865	219902	222158	191356	466908	342440	464245	242782	217503	454435	360004	101716	279487	516084
w/o MS2:(R)-3-Hydroxy-hexadecanoic acid_BMDB0010734_ms_ms_182878	MS	C16H32O3	273.25372:931475 274.25707:231022 275.26043:202628		13546070	7501750	5894174	10277741	12968127	6332120	6525940	11625902	14990451	15433868	7005411	14496018	5635000	12976709	4244956	3954636	5113188	3092254	1564440	13858196	7192549	4311823	2357851	6753592	5752762	2778182	2443087	13675109	7914590	6006806	1776325	8750380	5979722	8957707	3769073	5700716	7863613	1899291	3485877	2057771	1401575	1369132	3409856	5299562	6439594
w/o MS2:(R)-3-Hydroxy-Octadecanoic acid_BMDB0010737_ms_ms_324231	MS	C18H36O3	301.284:280827 302.28735:40906 303.29071:21713		689390	975914	1301766	2142265	607871	2219480	1232584	1486343	305145	750670	780039	1260430	273101	1494051	1496257	1415321	950706	848583	1142646	590371	806891	863518	867596	1070184	633707	1026020	607975	488590	573831	714941	1565593	678806	1049605	428327	988558	8973	8708	403052	300679	285688	399405	357028	780114	783206	478291
w/o MS2:(R)-Amphetamine_BMDB0012128_ms_ms_349147	MS	C9H13N	134.09633:1375428 135.09968:157541 136.10304:2060001		89494	59421	43339	718134	150228	103222	869916	83567	364840	43084	1007190	60613	41500	23414	86952	68874	74302	43170	5045703	73079	90524	103593	114100	46627	46367	70258	1415152	764621	1410900	1742998	933010	55473	54052	29858	23705	55151	30501	70735	27335	33119	63223	96628	1715745	40345	63015
w/o MS2:(R)-Mevalonic acid-5-pyrophosphate_BMDB0001981_ms_ms_305466	MS	C6H14O10P2	309.00635:42154 310.0097:0 311.01306:17302		71979	30855	51519	12839	43035	38813	9071	53116	73376	170821	183210	164207	172436	140029	127350	50390	57883	115255	100751	95875	3510	115888	88897	45322	3534	81271	76644	49708	30860	11743	37234	45522	6698	40963	22037	3386	89706	91353	3149	94538	36477	44540	20082	24617	44209
w/o MS2:(R)-N-Methylsalsolinol_BMDB0003626_ms_ms_288495	MS	C11H15NO2	194.11539:677843 195.11874:204078 196.1221:23550		4867712	7817256	1813855	4246202	1791666	4719618	4738450	3431128	4496692	1115332	4093614	1809293	700251	4377248	3529968	2516906	4119270	632991	2661254	3392497	551221	4353188	4391126	1117269	1169126	2515974	543695	2449293	2357874	4340997	3283594	4370222	1550998	2426110	1778252	1318057	1435746	5516314	5365616	2544031	2533335	3528464	3343557	4251365	2617454
w/o MS2:(S)-3-Hydroxy-N-methylcoclaurine_BMDB0006921_ms_ms_332261	MS	C18H21NO4	314.14682:161700 315.15017:66518 316.15353:0		214697	299655	152018	251224	289623	282568	258461	252232	224016	152641	242924	190045	349354	219859	182093	296570	367855	2431	216635	2718	224302	187752	373261	211573	190393	384514	188611	181477	169459	324071	247686	251254	99730	82027	52756	157697	435393	416392	252918	131464	403592	271704	288381	271084	145842
w/o MS2:(S)-Hydroxydecanoyl-CoA_BMDB0003938_ms_ms_28830	MS	C31H54N7O18P3S	938.25067:134508 939.25402:0 940.25738:0		136.087	136.087	136.087	136.087	136.087	136.087	136.087	136.087	136.087	1560	136.087	86753	41366	114723	1361	136.087	136.087	136.087	20785	136.087	136.087	136.087	136.087	136.087	1989	1946	136.087	136.087	136.087	136.087	192589	173617	136.087	136.087	136.087	136.087	136.087	136.087	136.087	136.087	136.087	136.087	136.087	136.087	136.087
w/o MS2:(S)-Reticuline_BMDB0003601_ms_ms_100941	MS	C19H23NO4	330.1734:155250 331.17675:0 332.18011:0		80579	303361	241123	265028	55807	489871	168047	70117	74452	121440	145670	85287	369977	676178	31480	11118	38053	63362	402411	185838	569668	1069453	499013	671947	518448	317136	123336	150826	177440	637815	435539	78914	163788	350965	262204	511208	609320	393105	350521	166652	169771	207167	432923	328513	874820
w/o MS2:(S)-Ureidoglycolic acid_BMDB0001005_ms_ms_35751	MS	C3H6N2O4	133.03194:1920297 134.03529:141056 135.03865:91878		3920827	3910084	3907777	4185535	3969494	4053053	4176902	4347511	2906580	2867428	3148940	4889038	5050210	5044053	2408927	2204002	2319808	3639071	3593386	3659606	4048974	4084118	4047500	3563714	3536086	3560621	3536162	3346648	3664230	4384767	4295480	4232994	5655040	5562736	5619134	3152162	3179523	3208592	3480588	3901448	3648820	3854246	3745530	3875412	3687754
w/o MS2:[2,6-dihydroxy-4-(3-hydroxy-7-oxo-5-{[3,4,5-trihydroxy-6-(hydroxymethyl)oxan-2-yl]oxy}-7H-chromen-2-yl)phenoxy]dihydroxyoxo-?????-sulfanylium_BMDB0096262_ms_ms_1239260	MS	C21H21O15S	546.06616:66187 547.06951:0 548.07287:0		3238	190.128	9779	2715	190.128	3174	2670	3481	190.128	190.128	190.128	120815	83930	80142	1999	190.128	190.128	138333	56523	66036	8902	13018	5738	190.128	2619	190.128	2206	190.128	190.128	1901	11136	7782	190.128	2560	190.128	2199	190.128	190.128	8783	2241	2906	2389	2192	190.128	2129
w/o MS2:{2,6-dihydroxy-4-[4-hydroxy-7-(hydroxymethyl)-11-oxo-2,8-dioxatricyclo[7.3.1.0???,????]trideca-1(12),3,5(13),6,9-pentaen-3-yl]phenoxy}dihydroxyoxo-?????-sulfanylium_BMDB0096252_ms_ms_1237653	MS	C18H12O11S	437.02692:33288 438.03027:0 439.03363:0		37184	47617	8764	20882	19424	6515	78935	38789	21264	30496	49406	42552	17061	20580	39616	52608	42119	89648	14203	27424	43365	21410	20551	39887	19736	40141	31085	53729	48011	17010	7995	6991	33075	6683	33662	52395	31408	46531	44761	56937	19591	36350	52205	69305	34308
w/o MS2:1-(beta-D-Ribofuranosyl)-1,4-dihydronicotinamide_BMDB0011648_ms_ms_345152	MS	C11H16N2O5	255.09756:1189599 256.10091:0 257.10427:0		2599083	2620324	1874280	1306372	1152160	1978574	2050141	1425940	4463074	4582902	2033917	2382172	2709043	232898	4243890	6848924	6900919	5082618	50659	3102846	2239555	3109895	2669305	2392659	69300	2395079	2024186	2844080	3224548	1902266	2592519	1588707	1626837	2061422	1553238	3136380	6202776	3079009	3103888	2797336	2685244	2378992	4813122	5083086	2455515
w/o MS2:1-a,24R,25-Trihydroxyvitamin D2_BMDB0006227_ms_ms_306012	MS	C28H44O4	445.32709:119791 446.33044:21171 447.3338:165103		260.69	260.69	260.69	260.69	260.69	260.69	260.69	260.69	260.69	260.69	2898	260.69	4073	260.69	2617	3492	260.69	260.69	5592	3351	260.69	260.69	260.69	6161	4213	260.69	260.69	260.69	260.69	260.69	260.69	260.69	260.69	260.69	260.69	3409	3455	260.69	260.69	260.69	5107	260.69	260.69	127975	260.69
w/o MS2:1-Aminopyrene_BMDB0096125_ms_ms_299860	MS	C16H11N	218.08774:236562 219.09109:18911 220.09445:0		280506	284581	282907	238278	303908	352146	352871	529178	290234	347775	683320	517651	533719	369183	264139	173271	283046	231645	296071	179538	260488	363812	512625	842399	863100	440285	249337	236682	576272	423534	355496	286161	340244	274951	305465	206238	349815	268662	214797	275647	312329	472260	720908	338965	191271
w/o MS2:1-Benzyl-1,2,3,4-tetrahydroisoquinoline_BMDB0004087_ms_ms_302226	MS	C16H17N	224.12796:162940 225.13131:166365 226.13467:303685		179303	205508	267556	122668	142071	117837	91363	140413	158929	179004	174993	231442	386127	76574	289047	200951	204274	76389	356387	44510	63881	388278	122088	125486	103297	76006	67165	106621	112833	103072	133155	142284	86467	133758	60750	37120	92100	136482	220900	255740	112225	97562	123807	145049	61171
w/o MS2:1-Deoxy-D-xylulose_BMDB0001292_ms_ms_27724	MS	C5H10O4	135.06534:185707 136.06869:85124 137.07205:197858		155907	236140	223289	196849	434516	326104	164612	259013	241161	304201	202603	211039	105074	315883	158748	172256	149782	122122	102016	142170	246166	259651	150039	173668	151686	129015	160891	166183	113333	198261	224706	141006	163297	341718	113121	103661	222783	182321	135613	271130	195920	179930	189563	250416	245166
w/o MS2:1-Hydroxypyrene glucuronide_BMDB0096164_ms_ms_915356	MS	C22H18O7	395.10657:243979 396.10992:29772 397.11328:36421		152.747	2204	152.747	152.747	152.747	152.747	152.747	152.747	152.747	152.747	152.747	152.747	152.747	152.747	152.747	1647	152.747	152.747	152.747	152.747	1086334	856007	1131012	152.747	152.747	152.747	152.747	66690	1598	152.747	152.747	152.747	152.747	152.747	152.747	152.747	152.747	35550	152.747	152.747	168045	152.747	152.747	152.747	116761
w/o MS2:1-Hydroxypyrene_BMDB0096025_ms_ms_103880	MS	C16H12O	221.09663:11904718 222.09998:1142084 223.10334:762030		51926692	51531444	52157520	52843328	51975156	52747244	51939272	52781952	47367752	47282152	48032664	56768968	57923724	59653192	49657428	49559844	49234036	60265572	60713896	59045300	56864984	57409868	56620236	47788776	47924132	48628744	54784336	55130224	55275768	56389480	56710352	56560036	43470392	43510904	43727216	50848640	50377060	51735848	52375584	51775296	52182416	53372828	53085660	52604400	56360332
w/o MS2:1-Methyladenosine_BMDB0003331_ms_ms_323825	MS	C11H15N5O4	282.11884:1637184 283.12219:113883 284.12555:0		144364	124836	65135	120851	95073	67636	174650	111838	9015605	9313632	8875450	495911	511016	504774	3804	8909536	12076	73411	67158	9552649	146596	209599	7485	8864	105975	133549	4986	92111	141390	140186	123140	264672	3979	2986	2294	2874	126747	2254	2552	88460	153565	3179	166896	104526	134565
w/o MS2:1-Methylhistamine_BMDB0000898_ms_ms_305834	MS	C6H11N3	126.09155:553481 127.0949:113449 128.09826:357836		1502328	1675058	1557896	1547143	1627636	1823349	1544933	1548762	1355050	648227	556714	864370	601611	883959	1436319	1467464	1433339	1576007	1578303	1573983	1833383	1833108	952871	1391424	1419359	1251799	1573439	1717325	1568485	2532890	2488303	2674149	2082212	1862254	1976198	1826178	1970501	1724024	1661856	1866463	1975530	2155767	2061569	2001717	1801134
w/o MS2:1-Methylinosine_BMDB0002721_ms_ms_107714	MS	C11H14N4O5	283.09494:129684 284.09829:0 285.10165:218080		300528	347055	4023	263395	173229	573771	226748	399964	222738	201978	303068	33562	258517	502875	215950	7660	3899	156823	125559	15794	105965	393848	8833	84915	455983	285039	131564	750803	452718	179398	155194	372328	4150	457216	222247	12018	15721	9314	13601	3790	110383	262632	357547	130280	4302
w/o MS2:1-Methylxanthine_BMDB0010738_ms_ms_13038	MS	C6H6N4O2	167.05626:1714504 168.05961:895482 169.06297:1235820		166190	148257	424044	964670	2237557	1071519	1905105	1030149	159444	195810	251451	5280484	5568808	110715	6020324	5777114	110593	81963	6513926	6371414	166394	154008	114827	5050023	188709	105876	172595	118897	110922	6192729	6247127	6584952	751494	111968	95435	119229	136224	74631	4703281	87983	112097	67122	104715	127704	119331
w/o MS2:1-Nitroheptane_BMDB0096100_ms_ms_167936	MS	C7H16NO2	145.10533:1658244 146.10868:1069612 147.11204:78652		443427	224218	207396	120132	115622	454094	204749	226736	89234	144500	128979	146795	198504	228630	148100	184164	115514	141006	222339	259356	113029	125968	85913	176045	210363	141289	144901	215888	155614	126098	196954	101201	320251	68697	201791	159691	133310	150733	120875	181795	148146	218752	147883	895786	149078
w/o MS2:1-Octene_BMDB0032449_ms_ms_135958	MS	C8H16	111.11719:130469 112.12054:11128 113.1239:243452		333865	924906	194610	675888	108306	250586	191419	776291	118382	119974	111570	52372	100256	116157	39164	111984	112836	703580	123775	88749	89511	85297	64838	107274	48760	241668	136223	54839	144630	121703	124320	158964	151352	188632	598354	113093	119060	109334	41197	1568206	81040	75502	1242095	116947	79324
w/o MS2:1-Phenylethylamine_BMDB0002017_ms_ms_320238	MS	C8H11N	122.09655:6663524 123.0999:851900 124.10326:291512		13152476	13660176	13860233	14037787	14488984	14187622	14575445	14915936	7816144	7259590	7249284	25147508	25098138	25341134	5849904	5800536	6404372	17513580	17809360	18453150	13407780	13554396	13679478	26298658	26156560	26581524	6181870	6665047	6140672	6564569	6278714	6277690	7168724	7171252	6991339	25264782	25173672	25496248	26391242	25896646	25373124	6123748	5974096	6008950	23341768
w/o MS2:1-Phosphatidyl-1D-myo-inositol 3-phosphate_BMDB0003850_ms_ms_183267	MS	C11H20O16P2	469.03003:30815 470.03338:81807 471.03674:0		47370	78284	7123	14666	21325	64136	9801	32646	21515	11265	24033	15527	23009	29470	8162	8516	24964	21812	11013	9343	13252	13025	13622	20563	7722	29463	7427	10956	10214	17854	7006	11584	7196	53812	22775	8901	20543	11938	22943	24811	22730	41188	15766	42678	35348
w/o MS2:1-Phosphatidyl-D-myo-inositol_BMDB0006953_ms_ms_1262923	MS	C11H19O13P	391.06024:46139 392.06359:0 393.06695:0		8349	270.057	5806	6586	7252	5439	10062	9386	8293	3593	5656	15078	4190	10398	14584	270.057	3343	8516	13100	6626	13897	5684	4816	10373	6197	4564	4779	3371	3719	3641	5007	13832	9552	270.057	270.057	270.057	270.057	10160	5097	24659	16329	5150	10160	4030	10042
w/o MS2:1-Salicylate glucuronide_BMDB0010313_ms_ms_147755	MS	C13H14O9	313.05142:102051 314.05477:0 315.05813:0		59411	189893	48147	148882	98088	62667	269088	78452	17128	70942	91143	30779	67197	96976	135456	82519	163523	45600	81420	50100	160187	107644	136222	68723	36280	47105	181081	258175	112166	140882	57365	159638	294576	124454	5003	75056	63101	113475	157195	186592	228762	58788	53980	81925	205602
w/o MS2:1,11-Undecanedicarboxylic acid_BMDB0002327_ms_ms_298926	MS	C13H24O4	245.17473:647101 246.17808:117075 247.18144:45440		5199756	9156424	1487687	9050659	5167326	9006142	5487788	5069846	1356830	4990244	5921620	5098992	5389406	4220400	5093936	4381322	5315568	8873797	2991156	4769097	3643430	9190955	6203664	4762583	1661346	5316998	1276324	3924294	5270449	5841314	4557904	4695579	4604234	4742329	4480622	8707639	2142951	4340498	6111638	3909883	6316998	8573450	8970999	4283586	8955914
w/o MS2:1,2-Benzoquinone_BMDB0012133_ms_ms_116435	MS	C6H4O2	106.99186:114614 107.99521:0 108.99857:0		42404	39492	76034	82183	60206	59971	50768	57343	125459	61502	73537	25443	92135	44021	61861	59720	40907	51394	22759	64125	120059	34195	225740	58559	42802	94841	50148	43279	38140	89688	48045	26933	35369	40987	60925	66425	48085	128430	67479	58059	91432	100506	87436	37898	33935
w/o MS2:1,2,4-Trimethylbenzene_BMDB0096092_ms_ms_44311	MS	C9H12	121.10547:531925 122.10882:0 123.11218:87374		238054	177680	877163	207230	162468	180047	183562	69762	156380	109460	80822	320218	101123	169687	123684	106120	468858	223794	139119	318347	213980	154186	134714	171002	158876	103279	159343	224142	150519	144780	180594	152263	99779	84274	69021	80970	98024	136531	159728	83003	94048	93120	311393	243835	78409
w/o MS2:1,25-Dihydroxyvitamin D3-26,23-lactone_BMDB0000969_ms_ms_301002	MS	C27H40O5	445.27728:225654 446.28063:50550 447.28399:0		731968	506750	257497	779679	172438	329016	269.256	269.256	527558	5788	3491	796154	317885	556042	174353	457293	345679	524385	408776	671975	564259	726691	472669	129686	588949	1036133	318531	269.256	269.256	407323	285881	305626	501839	456454	269.256	367471	444872	1275216	414198	1260163	1005701	269.256	3629	2693	1142359
w/o MS2:1,3-Dichloropropene_BMDB0096074_ms_ms_117778	MS	C3H4Cl2	108.94884:252133 109.95219:0 110.95555:0		888443	787764	811472	610835	624173	776297	589345	1173628	557813	370099	1064666	484496	476710	602749	391257	460105	88692	469337	779552	571901	645969	1085111	310594	706120	562368	315498	273771	586748	453716	712564	488225	604591	343298	498679	297054	545883	640034	445256	861135	742904	887388	591706	591555	368449	772814
w/o MS2:1,3-Diisopropylbenzene_BMDB0096097_ms_ms_163071	MS	C12H18	161.1324:595479 162.13575:46599 163.13911:635614		4484394	5053231	7618320	8575125	4272694	1308055	4876750	8559528	4753553	2170701	7607574	7895374	4635286	3889644	6602044	3408022	3687017	3290648	4152149	4725655	4593491	2818443	7663310	4386958	4716904	3302784	2896986	3385353	1105742	4577437	7502159	4309690	7517298	4113654	4438034	3959142	2735446	4145446	3206290	6191892	3870188	4046035	3996394	1592614	3669519
w/o MS2:1,3-Dimethyluracil_BMDB0002144_ms_ms_309870	MS	C6H8N2O2	141.06575:712724 142.0691:467238 143.07246:379457		87595	101964	700722	118838	96894	54989	21419	700334	832751	470421	544990	1400316	424230	396731	873318	183960	357293	569204	311042	291644	203886	250207	117116	76805	135187	236451	262763	135451	378718	65877	112999	55769	880790	1547689	1339152	98572	108847	117709	59974	162528	28078	161966	114296	109449	704455
w/o MS2:1,3-Glyceryl dinitrate_BMDB0002893_ms_ms_1293232	MS	C3H6N2O7	183.00989:16702064 184.01324:5512714 185.0166:74891408		2118863	4409396	6297388	2734159	8304522	5914408	3602335	1532950	47736260	50267648	45537084	51465948	46791536	4802952	52274748	54753364	54880392	48661648	48543940	50721584	49668848	49037880	53120800	52211204	54506508	59975096	59145064	59942992	52056892	48008764	51379828	45355188	3875902	2597292	2810852	51391228	54538524	69723616	49663388	56177940	50892368	48078412	50071948	49163192	121777928
w/o MS2:1,4-beta-D-Glucan_BMDB0006944_ms_ms_303313	MS	C18H32O18	537.16705:192104 538.1704:55718 539.17376:0		92307	15405	26961	5492	35720	62939	32920	12429	58441	113360	29705	110240	37932	5433	576652	538266	570608	375438	363894	340175	119844	131056	103369	210138	174914	196474	129857	182811	182678	119912	98355	121969	83759	98925	92070	142591	149391	133563	183988	239999	65277	174523	136421	193214	6058
w/o MS2:1,7-Dimethylguanosine_BMDB0001961_ms_ms_316720	MS	C12H17N5O5	312.13046:287333 313.13381:0 314.13717:1337389		700493	694804	697796	716553	645819	749324	800331	805450	465837	750421	640992	635488	628157	710362	818206	710539	719793	635848	773612	739576	816585	800250	764706	558696	798317	747550	744865	702680	672453	770827	768162	686649	704391	813938	838345	568424	653267	722560	594353	589436	589273	725419	632530	717668	457403
w/o MS2:1,9-Dimethyluric acid_BMDB0002026_ms_ms_298940	MS	C7H8N4O3	197.06694:630537 198.07029:100282 199.07365:0		88232	33579	24797	27362	23698	18269	19984	14724	90727	125553	183701	105519	73948	294702	295425	88300	69098	54254	49833	58280	54278	90759	51549	37687	31988	78360	2751880	128523	2896294	29388	71840	86984	46672	49001	38314	36732	47588	28732	258248	44384	14437	74333	53493	214419	1153143
w/o MS2:10-Hydroxy-octadec-12Z-enoate-9-beta-D-glucuronide_BMDB0096218_ms_ms_891234	MS	C24H42O10	491.28604:878594 492.28939:258267 493.29275:54112		10131259	7818120	7779792	7611870	3426001	2871814	7477402	7898833	7541431	4083047	6786548	7657550	152497	7862810	6944744	73111	3050496	31099	8258792	7818266	2862445	3114832	7734022	7252206	2514670	7144676	3014012	8538078	2259326	10936797	11412677	6295131	12450260	5658474	2679007	7063331	2399861	2553984	2320896	643347	5422694	9586472	13104366	13504006	2613017
w/o MS2:10-Nitrolinoleic acid_BMDB0005049_ms_ms_289044	MS	C18H31NO4	326.23285:122096 327.2362:22524 328.23956:0		953012	974306	707816	548656	1036462	556762	1010125	1017592	192535	10874	195973	452154	12996	304111	144214	23015	575518	28827	3560	184241	191663	115059	14125	168990	11139	17271	8819	11281	21954	9752	4102	10297	26964	196266	19457	390326	90837	17004	18712	171748	126771	83669	11465	191851	9603
w/o MS2:10Z-Heptadecenoic acid_BMDB0060038_ms_ms_958993	MS	C17H32O2	267.23141:397757 268.23476:229768 269.23812:671866		71026	51167	540654	65751	63308	76093	86131	62550	69655	24477	59678	51819	36064	26625	32946	116392	100372	50632	65607	106319	451871	82650	68460	38301	54596	74058	58442	38762	80519	64201	114627	85357	57024	37746	44649	61494	57785	58123	57560	48699	52795	76923	101228	81734	541213
w/o MS2:10Z-Pentadecenoic acid_BMDB0063571_ms_ms_1289280	MS	C15H28O2	241.20364:310321 242.20699:0 243.21035:11403		1522410	1595966	1447489	1479518	1618861	1423021	1287068	1508419	1297196	1216498	1320853	564295	1237280	1250644	1253506	1245107	712779	1246310	1491749	684588	1070851	560601	1351058	1437773	1435239	1580420	1380436	1337286	1394619	1243670	1351859	663196	927777	844569	1710903	1027781	902787	755578	876552	588889	875840	1151803	1324734	1235167	1240198
w/o MS2:11-beta-hydroxyandrosterone-3-glucuronide_BMDB0010351_ms_ms_132613	MS	C25H38O9	481.24487:54044 482.24822:25512 483.25158:0		73730	198.513	70429	76707	198.513	90445	65902	49396	16442	17352	198.513	75761	97883	198.513	198.513	198.513	34531	3949	198.513	198.513	198.513	2170	81368	44265	52188	2395	198.513	52025	198.513	81836	62799	82710	198.513	198.513	198.513	83061	37695	41678	2359	45506	198.513	70175	87252	198.513	198.513
w/o MS2:11-cis-Retinaldehyde_BMDB0002152_ms_ms_301167	MS	C20H28O	285.22183:955189 286.22518:0 287.22854:0		194132	171166	95271	140966	158723	202801	140739	236154	122957	136040	2677669	146097	103020	138338	104367	112533	70192	117807	89122	83101	179374	74572	116678	129036	82794	154809	141127	153697	115990	73533	172785	91641	3689808	94847	53872	130302	87675	108463	56436	75041	152385	111568	107727	93055	43339
w/o MS2:11-Dehydrocorticosterone_BMDB0004029_ms_ms_161445	MS	C21H28O4	343.17276:186193 344.17611:22656 345.17947:18658		333199	541186	578981	586731	519023	507314	509464	509628	2545	2728	3058	1118829	1098647	1265074	18349	3455	3504	392135	27198	4353	1082829	517718	1157584	598439	884205	62317	23790	2908	189438	2633	252.632	2728	3481	3626	3859	766178	1492316	810145	883231	1341813	72099	2870	2757	2918	774743
w/o MS2:11-Hydroxyandrosterone_BMDB0002984_ms_ms_137748	MS	C19H30O3	305.21457:1418978 306.21792:330668 307.22128:107125		2525518	2382565	2289548	2337391	2653866	2536607	2374683	2456820	9673542	9792653	9843631	6976188	6853252	6635984	1915202	1927963	1167678	1169635	540540	1111107	1157976	1093974	1095606	10615233	10674828	11115303	6836138	6945126	6895842	481599	339520	345524	9199471	9252995	9164480	2013931	1953889	2009251	1811672	1825464	2032870	1669028	2783465	2756942	520123
w/o MS2:11-Hydroxyprogesterone 11-glucuronide_BMDB0010364_ms_ms_56794	MS	C27H38O9	507.24362:188731 508.24697:45323 509.25033:0		354598	387006	309750	405097	180580	387583	187789	184964	235.898	235.898	2898	598972	786507	281232	235.898	2991	2456	449454	281090	339008	552408	643020	931681	783100	697157	1233986	3168	235.898	235.898	2746	3548	235.898	235.898	2446	235.898	1268836	805459	1200589	556692	617225	797268	235.898	235.898	2786	670521
w/o MS2:11-Methyldodecanoic acid_BMDB0062091_ms_ms_1276727	MS	C13H26O2	215.18359:1160823 216.18694:120941 217.1903:85124		3457972	17834	3071486	9632	14211	3508631	3657970	3935946	23859	1904976	13855	45982	42715	14868	3258792	3031386	1883448	24974	52750	21649	29119	29146	34730	45071	44039	79842	4210794	3658554	3770411	4362552	4447374	4394738	2601436	3029468	3141647	30933	45872	28807	32605	36042	32837	1875837	2823802	2638236	6990194
w/o MS2:11-Oxo-androsterone glucuronide_BMDB0010338_ms_ms_110624	MS	C25H36O9	479.24768:35585 480.25103:0 481.25439:0		6074	23340	10458	12465	29367	22579	4466	16276	3208	3079	241.993	26897	83701	52794	241.993	241.993	3163	23014	15268	13997	93015	42669	44829	42287	73490	52564	241.993	241.993	241.993	241.993	2584	241.993	30657	241.993	3204	51871	55215	58733	131073	75710	82814	2564	241.993	241.993	82563
w/o MS2:11'-Carboxy-gamma-tocotrienol_BMDB0095944_ms_ms_293284	MS	C25H36O4	401.26794:395317 402.27129:64184 403.27465:16717		1587187	1031254	803346	1574394	1100774	883581	1442483	829635	13789	80516	81573	16566	3184462	3125059	147125	4806	5936	1796682	593964	1551678	659444	766194	1799915	1687638	871558	564693	4774	11939	14967	4708	3326	212245	3425	4909	8956	1784037	1284806	565399	589771	1100860	1986172	15518	7415	8241	3837888
w/o MS2:11beta,20-Dihydroxy-3-oxopregn-4-en-21-oic acid_BMDB0011651_ms_ms_342738	MS	C22H30O5	373.19888:385138 374.20223:0 375.20559:93416		32484	43996	47505	432373	449099	2835	451447	60307	60382	79456	53547	66099	1692126	63271	137.392	176591	216703	242634	137.392	349897	280581	61841	137.392	160116	118247	93780	1569	178980	137.392	137.392	749402	826696	41608	89771	110603	1374	137.392	137.392	757528	663502	388115	346707	319594	543225	137.392
w/o MS2:12-Keto-tetrahydro-leukotriene B4_BMDB0002995_ms_ms_301995	MS	C20H34O4	339.23083:200110 340.23418:68746 341.23754:29802		429078	282790	419454	361558	419773	500677	457601	448229	1258624	1318106	1256152	1049452	992609	1020609	98537	65674	26320	133335	125885	107604	362132	20290	280404	118249	96973	223457	796022	936137	628982	16964	63710	14116	615807	576908	607718	381938	40325	157192	10577	13148	148606	145601	464393	284243	59277
w/o MS2:12-Ketodeoxycholic acid_BMDB0000328_ms_ms_28590	MS	C24H38O4	391.28418:2402676 392.28753:705276 393.29089:91343		4189528	3180860	3666032	3646067	3423446	2696424	3133228	4126544	2403614	1794024	2512948	1302049	1890608	3096569	1793194	1465317	2680366	1357901	589347	501130	1612745	2165792	1387699	1593333	1085112	2232981	1355525	3740261	2098754	4164705	4497334	4473542	2773249	2526571	2733488	4312992	2139447	1973306	3683120	1352603	1369886	1890139	899682	2167768	1240526
w/o MS2:12,13-DHOME_BMDB0004705_ms_ms_301136	MS	C18H34O4	315.25308:535243 316.25643:101097 317.25979:30709		1194907	1061231	1093118	71915	400126	1209652	895135	876404	1572699	175590	2104046	2646631	2728955	2883920	944977	769285	1393387	164852	88429	23896	26204	424745	64187	2175019	3920441	3263376	1360683	2511054	960106	44398	46709	212873	50079	81379	39075	453846	711809	104902	331816	777851	785272	522784	1309231	873083	20553
w/o MS2:13-cis Retinol_BMDB0006221_ms_ms_314854	MS	C20H30O	287.23282:375443 288.23617:61284 289.23953:55719		376477	94350	313654	374003	75889	71944	33037	358744	154028	11027	23056	34557	9734	30354	52312	36367	239154	32968	83526	34228	249587	60547	25993	337617	35730	30818	1027645	1117820	1150840	24935	51967	63642	16537	402310	61573	39559	63733	55977	1269291	1178705	1221196	1655486	1684236	1670966	68329
w/o MS2:13-Heptadecyn-1-ol_BMDB0096102_ms_ms_366272	MS	C17H32O	251.23662:174383 252.23997:46210 253.24333:337658		128816	47124	341265	39934	123730	117014	44725	99421	39998	34939	53207	248909	45228	47623	254903	61202	349869	285314	186569	158094	257612	28929	65871	47234	41494	358194	32984	43473	207301	36779	39528	57356	35589	54148	180264	44586	50189	26780	49501	38385	100279	303488	133043	46835	309390
w/o MS2:13-HOTE_BMDB0010203_ms_ms_298269	MS	C18H30O3	295.20975:1383533 296.2131:166735 297.21646:224453		2043628	181763	1472032	1029455	808754	311821	1239649	950657	867497	661573	1850685	747787	129479	120770	416047	714950	264904	414647	195931	175598	206439	944043	142727	1442928	245327	183200	190859	94969	6386794	105883	132167	135162	201498	274100	418482	154839	175844	8722416	426107	418603	354781	702943	240780	170085	139874
w/o MS2:13-L-Hydroperoxylinoleic acid_BMDB0003871_ms_ms_310281	MS	C18H32O4	313.23502:2731350 314.23837:483018 315.24173:86551		122051	564493	1581211	797808	71298	812497	115874	64581	1530569	34805	715828	476170	1160856	185353	743360	1209322	1298021	155374	1350506	971327	102269	105004	2510871	8464951	7501316	538248	109626	106468	482033	20444302	89473	131910	1062667	14899082	238648	71031	593990	569595	87289	125757	89837	503692	84127	16701973	373243
w/o MS2:13,14-Dihydro PGE1_BMDB0002689_ms_ms_310950	MS	C20H36O5	357.26108:975059 358.26443:210389 359.26779:0		7009236	4094566	14901438	13812316	10846794	5747308	12824409	12199682	2428989	2552269	5903522	5460785	1911894	6187455	4658926	5615016	3101917	2781542	4498736	6423675	5396748	6300559	897961	6521244	2585106	5327034	5850973	7129496	6152880	4813134	7161958	5516430	6251156	5217838	3190594	1921546	5119112	3472303	4928388	6281556	6799934	5356702	6593926	5092472	11137786
w/o MS2:13,14-Dihydro PGF-1a_BMDB0005076_ms_ms_323978	MS	C20H38O5	359.26141:95563 360.26476:26547 361.26812:15573		29313	40031	27735	11729	8734	106585	4062	11774	10675	39531	15794	11331	4675	18600	8177	23217	4309	14390	23566	3555	20481	6892	3968	10408	33307	4011	3879	4607	5634	4859	11926	9896	230746	579303	7011	3798	7583	9501	4015	8705	12355	3871	4002	3993	3696
w/o MS2:13(S)-HODE_BMDB0006939_ms_ms_1230879	MS	C18H32O3	297.23993:5091092 298.24328:908913 299.24664:275829		963183	1160204	2509508	118063	784649	116023	112039	95681	114812	531452	737817	73730	518996	95004	36979	44830	10986216	106185	5874728	2403713	130722	52272	4144751	96585	93165	6696298	51557	139282	60364	872384	71844	51806	896024	127265	2214085	5059040	856130	67732	130446	21203806	74657	130880	94735	202797	22597722
w/o MS2:13E-Tetranor-16-carboxy-LTE4_BMDB0095945_ms_ms_287178	MS	C19H27NO7S	414.16037:174118 415.16372:0 416.16708:258692		229068	387362	246762	502089	204799	200989	384936	393880	11323	6428	350.877	150281	75531	20940	5938	350.877	6104	7907	69487	86354	55960	58678	104079	4451	118193	112511	94005	5093	64377	207663	218401	226304	350.877	6627	4933	49353	350.877	350.877	485075	438764	21063	137066	308747	181998	92447
w/o MS2:15(S)-Hydroxyeicosatrienoic acid_BMDB0005045_ms_ms_310823	MS	C20H34O3	323.24106:387677 324.24441:60778 325.24777:24475		94897	82278	51601	63495	54415	35771	60582	101881	49326	56987	51441	54339	80296	25554	40868	57980	90640	1288229	24432	64817	78799	62277	200481	57055	740878	109439	41582	87879	64142	46844	541985	66571	21462	43309	21460	66634	1552327	891283	1796485	36609	2714702	32662	41176	29681	38484
w/o MS2:16-Dehydroprogesterone_BMDB0000995_ms_ms_308303	MS	C21H28O2	313.21405:333544 314.2174:50755 315.22076:25532		33400	57576	307652	297970	851511	886545	245214	224221	23998	46374	34317	156132	41546	59890	23786	170409	29576	14121	55941	37234	37740	24547	63606	61080	89699	208864	26292	40664	23805	45136	38176	59403	33494	58276	838507	17442	51987	47253	16134	247297	78773	229052	30971	27256	62325
w/o MS2:16alpha-Hydroxy DHEA 3-sulfate_BMDB0096239_ms_ms_915388	MS	C19H28O6S	385.15219:317146 386.15554:440993 387.1589:0		4660	38736	247.589	247.589	41315	247.589	247.589	247.589	2917	31937	12532	3009	4255	17234	247.589	26854	3684	4683	3618	14184	247.589	3498	3991	3197	34727	182217	23814	3171	247.589	3571	21609	2576	324341	2870	247.589	4576	3255	18997	4219	4829	3808	3798	31456	6772	3861
w/o MS2:16b-Hydroxyestradiol_BMDB0000347_ms_ms_317913	MS	C18H24O3	289.17743:183418 290.18078:0 291.18414:41000		1761955	735153	970897	1114070	415484	1034254	955319	1376679	62971	61523	515880	1434589	363001	665037	421001	86978	91409	79818	1219925	327941	74866	1227739	1505913	828364	705054	696429	245411	374787	917575	425036	117479	820492	405605	1237942	98190	528751	1634589	736238	1120273	949141	436585	79004	325819	147765	403051
w/o MS2:17-beta-estradiol 3-sulfate-17-(beta-D-glucuronide)_BMDB0010358_ms_ms_143661	MS	C24H32O11S	527.13977:80816 528.14312:0 529.14648:0		69034	16771	115708	53892	72799	111119	43828	199653	27818	69295	54819	10256	17616	49031	11725	50750	36088	14127	10690	22836	46790	71166	20619	18909	17230	65205	16430	39887	16482	12556	39664	44401	11482	37012	97349	48885	11699	12103	37731	13457	31863	13109	70044	15509	92753
w/o MS2:17-HDoHE_BMDB0010213_ms_ms_322346	MS	C22H32O3	345.22742:101112 346.23077:20865 347.23413:0		446346	631890	369179	413065	638912	73068	592950	356490	607479	639514	269533	76537	17597	437441	207931	341661	303778	217325	174716	387273	463261	324275	230211	353173	480015	409624	28384	385976	185001	293228	608475	358803	455894	572657	305306	258881	315912	345286	282823	209221	209322	70818	241012	517731	373680
w/o MS2:17-HETE_BMDB0109598_ms_ms_322449	MS	C20H32O3	321.22708:156886 322.23043:0 323.23379:0		120623	65554	713528	826835	348916	1111709	71221	1420107	128989	101407	110210	42159	143634	172804	52166	88729	62031	69476	47875	59749	114818	900113	144385	99368	85881	58039	73732	198905	83093	948359	81697	55359	64254	65877	293230	42582	57763	55221	67880	141372	65059	79121	106174	43683	57110
w/o MS2:17-Hydroxypregnenolone sulfate_BMDB0000416_ms_ms_108106	MS	C21H32O6S	413.17886:133696 414.18221:0 415.18557:0		281.886	136784	195472	236937	179428	257440	8621	220907	24773	58785	30630	377439	285262	50092	281.886	281.886	3130	24753	3419	112874	331512	621357	293367	324208	535853	329716	281.886	20660	19937	14379	26569	281.886	281.886	21858	15880	633032	574222	413202	448132	15041	488849	31536	281.886	13877	529707
w/o MS2:17a-Estradiol_BMDB0000429_ms_ms_302088	MS	C18H24O2	273.18481:1545829 274.18816:260314 275.19152:0		589707	1414084	711121	787209	1287678	693923	1402650	123194	8435942	8495871	4876445	2469093	7614864	7320430	242272	702617	248422	772266	465151	601934	911475	563132	8119028	7912140	6289925	7759710	8024962	8823219	8420046	514375	626896	655989	3200199	900126	705193	635216	3158799	1739697	2484844	2253470	4464688	2664731	5112346	5005994	1518866
w/o MS2:17a-Hydroxypregnenolone_BMDB0000363_ms_ms_370053	MS	C21H32O3	331.23041:424217 332.23376:77638 333.23712:44898		638007	578224	358752	497125	589070	237464	1098894	356740	2738482	2803530	2774875	1439601	1694032	1257414	147445	480746	273033	713865	519684	460313	369375	269717	472793	2598971	1624797	1610931	2637638	1289012	1264569	688316	593415	257822	2020242	4287412	4272789	278321	591243	250868	537816	476154	185830	488191	137161	928629	890623
w/o MS2:17beta-Estradiol 3-sulfate_BMDB0004448_ms_ms_1301491	MS	C18H24O5S	353.1655:868269 354.16885:102113 355.17221:0		3078966	3185144	3133435	3141768	3130794	3185468	3152150	2964491	3114928	1802376	3023958	2480378	2619957	4496097	2974618	2967044	2981506	3121598	3086064	3287776	3503927	3447123	3422086	3111412	3075283	3136177	3094868	3120066	3385452	3541200	3478227	3325420	2124527	2378739	2304364	3114722	2970184	2943066	2650057	2559358	2727228	2934660	2820522	2576001	2964674
w/o MS2:18-Carboxy-dinor-LTE4_BMDB0095946_ms_ms_294248	MS	C21H31NO7S	442.21384:66261 443.21719:65811 444.22055:26807		298115	27349	137669	19175	219745	88290	155062	50274	92210	152970	203041	210201	102329	183272	82987	141023	251087	132968	87736	118169	174826	119081	66829	127107	103151	144462	158792	104490	101045	113665	141918	306252	76716	230397	202271	159841	63360	44964	128721	162248	85170	180161	182246	237536	46257
w/o MS2:18-Hydroxycortisol_BMDB0000418_ms_ms_1126087	MS	C21H30O6	377.20355:1506289 378.2069:336352 379.21026:0		1100660	1070656	1001036	1111963	1035981	990489	1059704	1091340	516702	446514	522728	4809202	4518920	4752136	98594	277594	239757	1007122	1052117	997188	1136448	852288	1193170	860535	965748	930837	1696300	1639261	1560663	1399427	1280509	1325773	1234345	1328338	1178863	1714937	1670321	1630340	1429078	1581516	1321549	1228156	1291025	1294608	180.823
w/o MS2:18-Oxocortisol_BMDB0000332_ms_ms_1153654	MS	C21H28O6	375.16086:838392 376.16421:0 377.16757:0		3211650	3196288	3351293	3296663	3316752	3163097	3349872	3163530	73279	3341914	3486576	2096026	1164806	3165473	1690520	2257030	2092206	1107344	1629475	1675462	1785483	2861371	2862412	2525064	962814	980541	3131990	3002854	3064082	2340477	1872068	1483171	3635544	3616924	3488131	2353880	1508565	1255148	2327055	1125036	1380529	1679946	2812729	1617456	807294
w/o MS2:19-Noraldosterone_BMDB0096126_ms_ms_324697	MS	C20H26O5	347.16992:1336669 348.17327:226574 349.17663:0		177099	303154	406383	193210	11892	9846	5319	6867	62008	59699	9723	1354984	1053684	904691	3058	7648	33208	502260	327639	268510	522414	411955	7876546	9159864	622655	9040750	7587	54504	8157	73341	4436	67983	13872	3780	75850	1260453	9764254	4948916	527130	868384	9722102	5798	15985	68023	771645
w/o MS2:19-Norandrosterone 3-glucuronide_BMDB0063731_ms_ms_1315841	MS	C24H36O8	453.2374:282651 454.24075:37729 455.24411:0		262207	469282	275436	400277	348156	541483	313254	523782	243.923	243.923	243.923	1985938	2060886	1160828	2795	243.923	2985	380992	864061	160890	776964	1142605	685391	1533056	1335039	82617	3487	4647	3265	243.923	243.923	243.923	243.923	6104	3354	784261	1042464	733318	1481980	65033	859194	3810	2645	3277	159345
w/o MS2:1D-Myo-inositol 1,4-bisphosphate_BMDB0000968_ms_ms_178521	MS	C6H14O12P2	341.00427:68969 342.00762:0 343.01098:22091		229424	168624	210502	173330	230096	150186	225139	217773	204.715	3009	204.715	5145	195967	204.715	97233	204.715	79175	114902	118040	200516	148719	127589	166565	204.715	125967	88859	204.715	88710	193936	116083	75626	178376	2815	125918	204.715	107924	212584	213306	160005	90963	173005	92506	135229	144511	135413
w/o MS2:1H-Indole-3-carboxaldehyde_BMDB0063668_ms_ms_13113	MS	C9H7NO	146.05994:4207180 147.06329:638596 148.06665:825318		4525684	4454922	4744088	4622186	4718339	4685447	4708780	4782337	3635924	3526964	3686096	4602119	5304714	4737780	3816204	3703320	3760498	4774760	4696664	5033944	5184269	5493652	5114431	3674762	3315915	4907923	4942660	4942358	4844558	4271133	3978066	4175954	5189413	5034308	5012228	4276796	4109701	3947382	4105765	4101102	4273923	2617303	2852534	2876194	4827535
w/o MS2:2-(3-Carboxy-3-(methylammonio)propyl)-L-histidine_BMDB0011654_ms_ms_178805	MS	C11H19N4O4	272.12592:138934 273.12927:0 274.13263:0		99014	5048	289.18	130433	113050	5113	5211	127788	289.18	274736	4313	61361	6387	289.18	425757	289.18	135601	194909	221455	340550	139917	135935	4409	289.18	3577	25373	289.18	289.18	4425	5530	50146	289.18	289.18	289.18	289.18	123956	289.18	68201	28597	289.18	289.18	289.18	289.18	9357	20999
w/o MS2:2-(3-Carboxy-3-aminopropyl)-L-histidine_BMDB0011655_ms_ms_178053	MS	C10H16N4O4	257.13589:960192 258.13924:116732 259.1426:80906		7204609	7489030	6335138	1540069	5827636	6202861	6182050	2357861	3534150	4023940	3162214	1920636	249353	1640858	2690488	3223896	58271	2188056	7627555	3717500	1478776	11504768	2819718	6809758	2270819	2961970	1086025	3110807	1221135	65642	1455192	4429869	2455130	2660452	3323250	9835020	5563040	12326703	7058363	3354397	8550113	723119	3165259	1179824	1621509
w/o MS2:2-(Formamido)-N1-(5-phospho-D-ribosyl)acetamidine_BMDB0006211_ms_ms_23934	MS	C6H12N3O8P	286.05606:702794 287.05941:173327 288.06277:0		855361	791279	835345	769289	914229	877194	952753	919079	145.809	1599	145.809	1361739	1302017	1346283	145.809	145.809	1855	724503	755737	707458	744904	711391	742024	648030	673017	631308	145.809	463818	145.809	924483	918543	834832	145.809	145.809	28895	517712	145.809	145.809	824015	847407	710387	828038	793381	790607	1080560
w/o MS2:2-(Furan-2-ylmethyldisulfanylmethyl)furan_BMDB0063719_ms_ms_127518	MS	C10H10O2S2	224.98589:197241 225.98924:0 226.9926:0		165686	79446	234799	9404	118552	5941	195452	117160	211009	235284	264890	216205	193565	2154	248887	23499	3905	149429	4963	22503	276363	212226	222715	30854	256809	331738	135412	221813	163712	146116	237168	580690	303812	272534	374952	4382	114489	6621	45742	85018	30738	189620	89354	6665	285385
w/o MS2:2-Acetamido-2-deoxy-6-O-a-L-fucopyranosyl-D-glucose_BMDB0005817_ms_ms_319057	MS	C14H25NO10	368.15192:85942 369.15527:0 370.15863:0		118761	113409	186230	141252	241.683	35479	183607	158073	71749	241.683	241.683	241.683	126436	2923	241.683	241.683	241.683	241.683	97026	241.683	104287	29049	40411	44091	55171	88150	114321	241.683	61000	2863	3223	2604	241.683	166053	241.683	75459	241.683	241.683	112891	93937	103125	134534	4027	241.683	79161
w/o MS2:2-Amino-3-phosphonopropionic acid_BMDB0000370_ms_ms_183048	MS	C3H8NO5P	168.01617:3560533 169.01952:1495252 170.02288:200628		248333	346492	9024499	138040	343062	265677	8700415	347741	336174	306000	224521	187946	465345	216861	545840	177131	122306	429278	16350664	339515	253816	344095	7734920	267964	207877	358915	182524	317998	223157	208630	7426942	248511	337933	173453	229311	233685	498067	337799	329824	413595	143767	420886	471565	327336	525595
w/o MS2:2-Amino-4-oxo-4-alpha-hydroxy-6-(erythro-1',2',3'-trihydroxypropyl)-5,6,7,8-tetrahydroxypterin_BMDB0012143_ms_ms_296376	MS	C9H15N5O8	322.09305:114852 323.0964:16289 324.09976:14153		325563	301312	273396	315466	297246	331901	326984	324520	59657	37772	44970	418661	308127	577837	89826	54189	68745	222268	353638	247895	101197	220775	145023	118077	186925	188605	166435	126018	145026	344374	356364	335623	85194	74467	50644	101681	225227	156614	257751	260809	260214	72885	99628	171909	208105
w/o MS2:2-Amino-4-oxo-6-(1',2'-dioxoprolyl)-7,8-dihydroxypteridine_BMDB0001410_ms_ms_312871	MS	C9H9N5O5	268.04556:47634 269.04891:0 270.05227:0		2654	2372	128.03	1956	128.03	128.03	128.03	128.03	4888	1367	7548	27202	6613	2721	4796	4257	5790	2609	3478	4999	1391	1896	3887	1551	1579	1453	88282	2080	1871	17371	1938	1876	128.03	1280	128.03	1986	1543	128.03	1505	128.03	128.03	1467	2972	1495	128.03
w/o MS2:2-Aminoisobutyric acid_BMDB0001906_ms_ms_270976	MS	C4H9NO2	102.05534:1084984 103.05869:260272 104.06205:0		1424823	1962230	3440343	3039110	2018568	4094601	2332511	2033785	960447	374312	995670	5044637	4787595	4672601	1109954	2851041	2414738	3144124	1628480	1257740	1573683	3499772	1170314	2875673	1124785	2787446	2090808	2059296	1807581	1574971	1178672	1699930	457308	308552	642366	1821025	1097547	2024124	914082	917494	615880	2965730	3046022	1799499	2950472
w/o MS2:2-Aminomuconic acid_BMDB0001241_ms_ms_294974	MS	C6H7NO4	158.02795:2193613 159.0313:530259 160.03466:0		4846	9734	6127	3404	757878	2207085	2826348	3337638	9917	6642	4399	6356	1736	3527	2869	2311	7635	2909	7275	9714	2604042	2551	10212	9779	16185	9205	2957	8639	9410	1842	13396	4048	20374	8868	5380	4654	6079	10278	7094	5647	7408	8187	14663	10136	5163
w/o MS2:2-Carboxymethyl-3-hydroxyphenylpropionyl-CoA_BMDB0012145_ms_ms_323379	MS	C32H46N7O20P3S	974.19672:76696 975.20007:23798 976.20343:0		11049	64757	30547	53632	10406	48339	53979	56272	5634	22594	11516	152025	229606	182045	8048	3743	11733	17932	23712	60758	22887	36159	9510	32875	26832	26380	72293	34957	63598	18944	77033	106229	57521	13668	35025	117763	143735	107049	150728	78264	58310	98587	128828	186710	5531
w/o MS2:2-Decaprenyl-3-methyl-6-methoxy-1,4-benzoquinone_BMDB0006484_ms_ms_320387	MS	C58H88O4	849.67407:629114 850.67742:286191 851.68078:72395		2831728	2953649	3838081	2304830	1628642	1617954	3739168	1939421	1442078	1398819	1383170	2649268	1878779	2299891	1673383	1056280	837600	4247254	1877652	2394092	2556949	2430776	1679646	1898361	3410809	2374498	2558394	1924668	1934891	1274866	1327142	617922	2054764	2294237	2215999	670982	1689374	1911322	1326882	2059500	1882354	1005842	1490098	1577832	873727
w/o MS2:2-Ethyl-2-Hydroxybutyric acid_BMDB0001975_ms_ms_292366	MS	C6H12O3	133.08017:614962 134.08352:63291 135.08688:147741		457403	3527262	962931	796224	1168500	634868	730460	4318674	734971	732639	818326	772753	675297	540610	1081190	807066	490431	1155302	1293126	337355	570013	745212	469130	924295	905119	949594	729905	523926	690138	365927	478867	357658	251448	426249	558118	838885	996086	456430	375282	579629	328561	1185782	591209	425991	728610
w/o MS2:2-Ethylacrylic acid_BMDB0001862_ms_ms_319614	MS	C5H8O2	101.06003:191866 102.06338:377338 103.06674:49188		150128	439646	546063	69415	732898	262972	117676	434368	342489	849075	923006	97250	278304	69573	113748	82142	93933	161379	124479	125521	73593	623826	506275	72150	73150	207836	348802	930243	487182	136373	578448	861228	288205	87236	34268	106212	146261	509897	94984	59330	87343	103496	408952	313284	46080
w/o MS2:2-Hexaprenyl-3-methyl-5-hydroxy-6-methoxy-1,4-benzoquinol_BMDB0012146_ms_ms_303850	MS	C38H58O4	579.45117:401735 580.45452:60415 581.45788:34186		29790	11896	177290	147847	186503	1772649	33230	4397	184550	42281	44146	432099	138310	130766	71983	42500	36861	32699	20463	5045	20383	23624	2333	6719	21046	26271	3258	10209	3734	3686	15658	3613	3742	4617	16236	4848	4365	3544	233.329	4514	4562	3382	3528	5034	3697
w/o MS2:2-Hexaprenyl-3-methyl-5-hydroxy-6-methoxy-1,4-benzoquinone_BMDB0006820_ms_ms_182625	MS	C38H56O4	577.41882:39832 578.42217:0 579.42553:0		29574	15728	41328	52310	34581	62371	47337	36082	8266	24508	14838	183.66	3066	183.66	20474	29904	26521	183.66	2951	2296	183.66	3207	183.66	183.66	183.66	183.66	68816	39167	42429	65377	109210	111378	44732	55221	79026	183.66	2265	2253	183.66	183.66	183.66	62137	62059	70183	183.66
w/o MS2:2-Hexaprenyl-3-methyl-6-methoxy-1,4 benzoquinone_BMDB0006819_ms_ms_180562	MS	C38H56O3	559.42566:388824 560.42901:81688 561.43237:0		279.94	474114	418234	279.94	279.94	279.94	279.94	279.94	279.94	279.94	279.94	279.94	279.94	279.94	279.94	279.94	279.94	279.94	671317	279.94	279.94	1657267	279.94	279.94	279.94	279.94	279.94	5198	5306	5179	279.94	279.94	279.94	279.94	2980	279.94	279.94	1079608	3098	2831846	279.94	279.94	279.94	5112	3311
w/o MS2:2-Hexaprenyl-6-methoxy-1,4-benzoquinol_BMDB0012148_ms_ms_301744	MS	C37H56O3	549.45428:478740 550.45763:241151 551.46099:0		422.998	422.998	422.998	422.998	422.998	422.998	422.998	422.998	22308	18616	24455	9602	23098	422.998	4230	6313	28549	12606	14739	22820	19398	9229	4845	5390	32196	30729	12996	422.998	4474	422.998	422.998	422.998	422.998	422.998	422.998	11810	7622	422.998	27509	19361	18154	12660	50722	18837	79190
w/o MS2:2-Hexaprenyl-6-methoxy-1,4-benzoquinone_BMDB0006818_ms_ms_178192	MS	C37H54O3	547.39703:763630 548.40038:216030 549.40374:2767866		1483466	2250277	1085091	912616	776898	2288031	978402	1445940	279833	652095	445707	398742	286089	219337	224207	58531	5294	5858	7741	5623	4748	5538	6663	254153	230263	565388	876066	1192113	1083369	2242490	1630638	3041551	1971639	1079060	1172993	1839783	1301930	795844	658834	2318613	1677930	3123727	2543863	1336087	1552194
w/o MS2:2-Hexaprenyl-6-methoxyphenol_BMDB0006817_ms_ms_178378	MS	C37H56O2	533.41772:136834 534.42107:0 535.42443:0		338657	215273	6921	4984	5484	5427	5176	85760	4388	3467	3614	3602	3403	3832	5542	4870	3280	4013	3496	4063	4160	4490	8833	7350	3665	9312	5367	3649	4137	4381	5219	9935	38327	3394	3739	3875	14137	10103	3780	26941	17541	6073	3688	61178	5298
w/o MS2:2-Hexenoylcarnitine_BMDB0013161_ms_ms_316833	MS	C13H23NO4	258.16992:195007 259.17327:25739 260.17663:0		306085	108665	118200	129964	198384	70628	203943	111048	98692	72121	71962	85137	144325	91620	89546	53122	144531	254788	67254	67076	104528	115235	163957	520798	154375	85886	49918	74652	80676	86653	80854	82861	195539	513408	59751	96069	66578	61483	156434	89299	77911	135936	56078	104112	122754
w/o MS2:2-Hydroxydecanedioic acid_BMDB0000424_ms_ms_114652	MS	C10H18O5	217.10464:7651287 218.10799:676356 219.11135:13913966		11827217	11848840	11699091	13348668	10955616	11945501	12709849	11806417	1756944	2862092	3354522	18801812	20024066	19552636	3934384	3625902	4718474	19294836	17650502	18800716	19744660	20362402	20062006	24172882	24020974	24131564	1163567	4078496	3823879	3537128	2974669	3394350	3012977	2209914	2527962	23765280	23861032	24738554	23253226	21915224	22825792	3471311	2977482	2072466	26661074
w/o MS2:2-Hydroxyestrone-1-S-glutathione_BMDB0095947_ms_ms_313258	MS	C28H37N3O9S	592.20898:198546 593.21233:0 594.21569:172681		147248	73455	171639	108916	140715	158781	222585	209442	1089.57	1089.57	1089.57	316231	78448	87133	1089.57	1089.57	1089.57	117331	78302	64658	33331	17026	53634	32881	66747	22211	38751	14043	14114	114467	117266	164463	17935	1089.57	14524	15332	10896	14463	297646	164041	94325	18445	54504	87057	48692
w/o MS2:2-Hydroxyfluorene_BMDB0096029_ms_ms_13082	MS	C13H10O	183.0782:13479121 184.08155:869998 185.08491:799997		3605626	4284188	1229613	1912206	1520281	2284237	1597278	1587600	1455354	835868	1612306	732113	785163	305941	1225710	1106016	1617280	1483606	1184066	1606964	1586481	985405	975764	1642771	1454247	1698192	1310799	1556849	1440484	1866685	4160162	1458864	4423094	1339182	1555567	1035841	959194	807905	1195279	775790	902151	2050340	949236	1861194	1681580
w/o MS2:2-Hydroxymyristic acid_BMDB0002261_ms_ms_335169	MS	C14H28O3	243.2068:162982 244.21015:22273 245.21351:0		130397	50839	58882	107311	68035	46551	91977	64423	237238	12703	325440	8427	12873	24135	6353	2800	16864	1016782	623210	573060	6218	10906	5871	5180	23355	13044	15006	6352	10867	24752	11093	12124	423606	280739	483301	320321	382369	335492	22848	3182	15927	122878	5678	10125	13555
w/o MS2:2-Keto-3-deoxy-6-phosphogluconic acid_BMDB0001376_ms_ms_25796	MS	C6H11O9P	259.01651:274713 260.01986:27443 261.02322:56030		311284	300346	308188	774049	286231	490548	416762	361811	72507	120243	117200	128226	183783	170242	108925	71502	89773	200635	251144	188227	402075	448825	161343	110202	96097	193077	91777	134939	99335	99933	114335	170702	294523	604606	567005	290853	146610	266434	179964	237143	117594	50951	185056	161414	87072
w/o MS2:2-Keto-6-acetamidocaproate_BMDB0012150_ms_ms_292764	MS	C8H13NO4	188.09181:605547 189.09516:41609 190.09852:119689		3512635	2949550	2867614	2684353	3393354	3106937	3686554	2370198	3105841	3087820	2046855	2396956	2738640	2417711	2970833	2464262	2950030	2994348	2572934	3238416	3357716	2910804	2783655	2488738	2594550	2772474	2782023	3023023	2750279	1702891	3258104	2906855	2645668	2759612	1362452	2510497	2353056	1697951	1730507	2462324	2541721	2582893	2716432	2675696	2923979
w/o MS2:2-Keto-glutaramic acid_BMDB0001552_ms_ms_23650	MS	C5H7NO4	146.03587:278609 147.03922:0 148.04258:0		672033	388719	755061	2294078	146811	878964	513817	58439	46812	313870	56688	370175	911812	1235228	178672	392996	415160	181476	236016	573840	705339	477078	207754	838592	1680590	480807	50471	187928	584703	160969	49459	263813	23999	36715	25716	185039	228467	386874	528951	33921	619625	39964	278812	244101	314527
w/o MS2:2-Methoxyestrone_BMDB0000010_ms_ms_363541	MS	C19H24O3	299.14685:203815 300.1502:16091 301.15356:164042		158382	17092	547886	260660	197083	565838	409853	348800	28732	59398	28430	229748	440778	359160	13900	7864	30572	467519	23874	24863	282896	247691	243129	733209	730243	396163	15549	13545	14371	24032	11829	12824	18305	7088	13543	507300	19469	1179569	941319	768068	450257	4824	13372	14161	563539
w/o MS2:2-Methyl-2-phenyl-undecane_BMDB0096107_ms_ms_71951	MS	C14H22	191.16425:1223235 192.1676:237186 193.17096:113530		2182556	15085528	15007246	1924413	15655363	3602167	14571390	4549080	100458	1613743	2698813	313662	442383	273044	130568	1680693	1862218	338308	169846	236633	2465991	109340	2072163	386884	9425025	460068	526075	2118512	1725363	817593	16448271	172098	16834254	1443026	1738028	5046294	844889	5158636	4586058	5032844	200707	18437228	2568976	10014365	9018008
w/o MS2:2-Methyl-3-furanthiol_BMDB0063682_ms_ms_86874	MS	C5H6OS	115.01569:1432644 116.01904:1119140 117.0224:57499		1099588	1038864	639646	745301	899941	302588	817075	532639	4945752	2848221	6552742	3708074	1410844	399688	1411450	3669152	2114537	4585725	3992778	2746772	1862567	5485040	3483598	8663973	2982774	4192613	1650301	1969947	341480	6131442	1384427	3233327	319211	500468	238306	3401748	2377894	1975470	4549410	7765575	2616417	3852948	4305092	10490655	4749418
w/o MS2:2-Methyl-3-hydroxy-5-formylpyridine-4-carboxylate_BMDB0006954_ms_ms_324909	MS	C8H7NO4	182.03348:199854 183.03683:0 184.04019:0		233667	31038	280998	166455	102864	53988	228255	77123	135415	318340	63001	40391	31945	43806	342716	126537	186512	91044	95996	173080	128350	23705	25921	187183	158077	18742	76894	102064	48864	89534	39857	82996	308404	47130	95055	49059	117433	165571	64602	163709	19368	366025	37234	167731	23660
w/o MS2:2-Methyl-3-hydroxybutyric acid_BMDB0000354_ms_ms_8062	MS	C5H10O3	119.06867:2203062 120.07202:72023 121.07538:162618		1751025	1059586	5695705	4803740	6020041	4720392	8310696	15424001	1486176	2135104	2514421	2453111	7007149	11864470	8646871	3209002	3378394	8680672	4455140	7373930	3180406	7120114	8297212	7607588	6584242	1975986	2022510	8580935	9339559	1995685	5253488	4811258	16007769	13261082	7116740	3812090	4320268	4738197	5448918	6266540	15381204	3108753	2086305	1900548	1607662
w/o MS2:2-Methyl-3-hydroxybutyryl-CoA_BMDB0001356_ms_ms_59948	MS	C26H44N7O18P3S	868.19098:114151 869.19433:90122 870.19769:0		38598	255989	17370	51935	65209	179157	198589	140480	41939	47380	70783	64646	71893	137046	31236	1598.02	1598.02	64935	82916	49253	281175	252870	196567	150000	91434	72955	94446	28469	68563	49220	36925	33886	80663	157360	109851	136217	89775	94534	18927	66296	31365	27461	21347	32033	121544
w/o MS2:2-Methylacetoacetic acid_BMDB0003771_ms_ms_125686	MS	C5H8O3	115.03919:289891 116.04254:33601 117.0459:0		1752977	1459989	3499262	2261183	2083565	1002191	3344423	1630842	1434186	275888	478753	1863089	1951974	622126	941034	1942044	985666	797346	1892252	103430	762211	2586254	1299784	607109	1127466	126572	1115057	1283086	1220783	1565671	46174	1497820	807692	1399468	1737629	33244	1533816	980039	78316	581012	42119	1204278	651830	1966290	1383722
w/o MS2:2-Methylacetoacetyl-CoA_BMDB0001157_ms_ms_28417	MS	C26H42N7O18P3S	866.14795:195107 867.1513:93545 868.15466:0		581043	425696	202266	441161	276678	317332	240224	606.599	606.599	606.599	291664	606.599	606.599	60701	332594	144785	606.599	215384	261277	606.599	606.599	606.599	606.599	606.599	379038	606.599	6423	271793	606.599	350526	606.599	6750	383715	606.599	142021	606.599	606.599	247299	538256	225778	175668	355709	606.599	133240	231698
w/o MS2:2-Methylbutyroylcarnitine_BMDB0000378_ms_ms_591	MS	C12H23NO4	246.17023:1118146 247.17358:143229 248.17694:46150		322149	19702	12818	26407	67919	213549	14288	17621	9426	15535	163564	51606	92389	26714	296707	18915	125168	84771	60175	64713	67464	44882	57650	60570	84698	49070	185497	11104	363643	12669	145538	83422	170806	230083	9758	71056	42153	92910	56551	33845	95345	12108	14364	183397	36291
w/o MS2:2-Methylglutaric acid_BMDB0000422_ms_ms_178375	MS	C6H10O4	147.06537:196432 148.06872:19315 149.07208:91804		2011600	218347	1355926	918533	1002203	436038	1766111	795517	1134338	285842	439804	131081	342344	145592	411556	160763	346933	95859	288090	241994	382539	117189	233414	157196	112296	220669	224711	133992	137371	108105	125300	129328	153938	192822	239715	158247	242153	244667	147945	121544	161090	120598	194697	363323	165995
w/o MS2:2-naphthol_BMDB0012322_ms_ms_78410	MS	C10H8O	145.06891:1851895 146.07226:236887 147.07562:0		1965647	1703040	583867	278215	1788775	2070696	2142050	292024	430467	424552	411552	2878648	2540066	2511027	303733	1659827	2410614	3265000	166240	261341	1976781	283454	3554286	175581	2965978	2655962	282523	3176727	3617912	2372552	2678313	2486159	479735	579804	471972	378808	642612	422898	262801	345967	2397072	2180239	1923194	2241788	1641054
w/o MS2:2-O-a-L-Fucopyranosyl-galactose_BMDB0006590_ms_ms_292573	MS	C12H22O10	327.11755:850756 328.1209:0 329.12426:0		53027	39229	87148	187348	48294	130952	73651	40160	155239	433232	64562	86360	230764	378859	13325	60846	98848	61625	206125	324772	59163	37096	200907	99311	220460	192284	424525	419710	65491	80586	18619	158181	11584	6401	45550	189728	106958	89956	151833	163888	196977	24176	36593	55963	48591
w/o MS2:2-Octaprenyl-3-methyl-6-methoxy-1,4-benzoquinol_BMDB0011661_ms_ms_178704	MS	C38H60O3	565.44482:58167 566.44817:20690 567.45153:0		5328	118782	337.909	337.909	337.909	90521	129448	337.909	4538	337.909	337.909	337.909	3379	4864	19861	337.909	337.909	4392	337.909	337.909	337.909	337.909	337.909	337.909	337.909	337.909	175307	247029	337.909	166345	116888	185079	82019	337.909	337.909	337.909	337.909	3567	337.909	337.909	337.909	337.909	200757	106303	5868
w/o MS2:2-Octenedioic acid_BMDB0000341_ms_ms_294252	MS	C8H12O4	173.07829:2118235 174.08164:166847 175.085:295491		1994810	741892	778994	2518468	3431422	452942	1646983	2118452	2671478	768169	355085	363344	322233	1803987	2831978	1243774	1467393	9015689	1510205	2695987	1513096	2312034	684145	557371	221802	610662	853443	5942524	1017989	367845	536413	1759766	898127	1903840	1703280	512528	4425619	410354	9398995	10435468	473316	1495687	477223	475349	1963094
w/o MS2:2-Oxo-3-hydroxy-4-phosphobutanoic acid_BMDB0006801_ms_ms_25572	MS	C4H7O8P	214.98657:64617 215.98992:60472 216.99328:51732		177.253	3525	5073	177.253	6670	3868	83433	10731	3570	1969	3040	2564	3444	177.253	177.253	2222	2504	3250	3910	4483	2607	4187	2462	44678	177.253	2883	2448	4116	2789	177.253	6242	5507	5507	106461	130094	3722	2170	177.253	177.253	177.253	177.253	3705	6011	2149	8429
w/o MS2:2-Phenylaminoadenosine_BMDB0001069_ms_ms_356833	MS	C16H18N6O4	357.12067:107971 358.12402:27820 359.12738:56820		7289	276.918	276.918	227623	157986	5815	4697	171409	13204	12514	4681	234689	3637	188906	9257	3657	4130	3665	3201	4335	4092	250435	5277	4553	217090	276.918	276.918	276.918	3019	276.918	3142	4080	3149	3214	3180	276534	304855	529708	382838	603999	3161	276.918	276.918	276.918	686961
w/o MS2:2-Phenylbutyric acid_BMDB0000329_ms_ms_301701	MS	C10H12O2	165.09062:391444 166.09397:84147 167.09733:147338		3442556	5383113	2430638	611040	547068	1008204	5841350	424767	1035024	535192	966463	927122	1261416	1548017	1877792	2938111	1430473	1830609	846916	1687778	1497051	2187345	1816460	1887082	637415	969521	710461	1415600	721656	555030	777918	867389	1108807	2098427	2222253	427802	867368	2758375	2447282	923617	959721	1415431	709305	1021267	2824405
w/o MS2:2-Phenylethanol glucuronide_BMDB0010350_ms_ms_290362	MS	C14H18O7	299.09842:405838 300.10177:661243 301.10513:920179		416015	572626	466043	429704	324904	375067	8256	2805	334664	469581	4302	2550	1899	3263	138518	908838	702840	647443	795720	759906	487865	797296	515387	525464	461979	2080	905777	515612	394630	1283028	534632	643190	510636	410342	181325	722460	759827	495369	733026	1876	561196	893591	341007	329528	2177
w/o MS2:2-Phospho-D-glyceric acid_BMDB0003391_ms_ms_29197	MS	C3H7O7P	186.9809:10600114 187.98425:563309 188.98761:1569615		3828252	3902342	1682565	1209128	1935068	3071251	768281	1914922	62494572	58628364	61218492	64059044	63675312	1201977	70798600	69047200	69618568	65286500	68223136	67282176	66383888	69885568	62354976	72458888	79647152	91149296	84671768	85532464	71438736	67668848	66344572	71130432	2213288	706998	2099308	65596016	84386480	92666264	71613608	79693936	67326104	65847484	71415160	68084160	201480880
w/o MS2:2-Piperidinone_BMDB0011749_ms_ms_54461	MS	C5H9NO	100.07611:657936 101.07946:71041 102.08282:95933		1936404	1873607	1493890	1718848	1806041	2095797	1789536	1740231	1514669	1329403	1177094	730495	787595	1092466	1819114	1804377	1757600	1852352	2303448	1875210	1625093	1749123	1657422	1389834	1390500	1458043	1577802	789813	648542	1715552	1507127	1583779	1857291	1846229	1566633	1259156	1348244	1231282	1611328	1785927	2107390	1873135	2126286	2553025	1059262
w/o MS2:2-Thiothiazolidine-4-carboxylic acid_BMDB0096130_ms_ms_300280	MS	C4H5NO2S2	163.96484:292293 164.96819:196895 165.97155:429708		2272171	1522631	1730334	1132915	912015	1161909	1098542	84651	48641	25910	527450	135549	42766	37728	38905	54200	37808	74929	494238	161265	607197	70972	990680	2471989	68877	97498	781898	57587	91202	1960256	39939	83607	57133	121342	74674	728944	1322820	75565	88327	72982	2578912	823308	127249	66567	72601
w/o MS2:2-Thiouracil_BMDB0062540_ms_ms_157030	MS	C4H4N2OS	126.98981:1464598 127.99316:1374680 128.99652:0		132377	194487	305830	354284	235512	414595	193670	181351	125857	150065	182398	270968	131114	141158	267431	199421	228996	192632	329626	195392	299738	326251	6575824	258218	333040	339733	108360	278163	157060	335211	209039	249570	224445	73668	211327	239587	274850	235264	226497	218064	7349742	94204	204404	202035	587421
w/o MS2:2-trans,4-cis-Decadienoylcarnitine_BMDB0063653_ms_ms_1218397	MS	C17H29NO4	312.21579:477204 313.21914:250497 314.2225:61237		2973305	2827241	2550781	2621212	3281840	3230830	1737210	1521648	4222224	4284454	4239454	4071673	3778816	4136262	1770114	1735917	1858116	1384863	1763640	2922412	2813297	1482770	1393631	3595908	3550004	3448176	3434459	3399966	3114178	2826957	2817449	2764759	3007256	2933259	2919604	2823721	2779017	839426	1688948	2864456	2783776	2956494	1274663	2993278	2717522
w/o MS2:2-Undecyne_BMDB0063703_ms_ms_1440773	MS	C11H20	151.14417:4010487 152.14752:233959 153.15088:271901		17375576	17182568	17153942	17398232	19024738	18462438	18198762	17570028	23721858	23609816	23658550	12129669	12176011	11312090	9125136	9590729	9225097	20632120	20505600	20401764	21195366	21230302	21933766	7726475	7847828	8061176	16351753	16252261	16810850	63199184	64167928	63155820	10168610	9452305	10573904	54613120	58100896	56553792	2689752	3842830	3714597	9760592	9542934	9730997	27169292
w/o MS2:2,3-Diaminopropionic acid_BMDB0002006_ms_ms_291918	MS	C3H8N2O2	105.07037:192436 106.07372:46780 107.07708:157661		1559392	1633752	1595592	1521443	1782559	1674383	1720092	1650766	176683	47109	86693	54382	58093	181537	189680	31500	46531	214497	51598	56108	54164	70662	62095	56787	50734	71602	47102	51554	11277	59512	71073	82853	76623	71258	35161	48707	51271	53411	37032	47576	85834	77679	96739	54159	58326
w/o MS2:2,3-Dinor-6-keto-prostaglandin F1 a_BMDB0002277_ms_ms_293500	MS	C18H30O6	343.20969:127732 344.21304:18869 345.2164:20071		833314	393127	640685	326942	1132355	488615	1110354	605607	607396	3125	248965	324449	351467	495840	337560	48512	57899	9924	755006	434662	3787	516943	871487	104434	454564	261556	487761	467445	367761	11883	686510	285187	376371	304977	562730	240903	800262	534534	290908	81536	101544	596710	442130	57577	597229
w/o MS2:2,3-Diphosphoglyceric acid_BMDB0001294_ms_ms_177963	MS	C3H8O10P2	266.98447:86468 267.98782:0 268.99118:288103		429865	264324	240202	481255	217203	461639	438591	474414	159620	90015	112543	664771	717911	361267	201553	231271	445026	348723	340401	346677	532829	560385	361408	487145	494528	311048	260071	299849	264106	395117	287948	488719	302081	143520	210184	578285	327890	604320	284231	533321	257772	166137	236642	145563	404318
w/o MS2:2,4-Dichlorophenol_BMDB0004811_ms_ms_178676	MS	C6H4Cl2O	162.96674:1701820 163.97009:279673 164.97345:94193		11481967	10691362	9442740	7481488	8472424	8674756	9822683	11736294	12239755	13445590	9561983	9920503	10830875	11580151	8850736	12247633	10898873	10795285	9027088	9375808	11012101	8416075	10731801	13152754	8804001	9982978	11833426	7597024	9667609	12148741	8254555	7505856	11949613	8711322	7453606	4076389	11723209	6094606	8445886	12212290	13295033	8578308	6474982	5330198	4584690
w/o MS2:2,4-Dichlorophenoxyacetic acid_BMDB0096128_ms_ms_110671	MS	C8H6Cl2O3	218.9483:465381 219.95165:0 220.95501:156200		165.191	17265	165.191	2723	165.191	165.191	3190	3389	165.191	2941	2870	2641	165.191	165.191	2675	2771	12295	29715	715436	2031	21426	200309	547239	396285	1963	2417	165.191	2463	2274	17366	2490	165.191	2368	2393	2414	3331	2152	165.191	905768	932146	610416	27812	16727	3317	165.191
w/o MS2:2,5-Dimethylpyrazine_BMDB0063679_ms_ms_16245	MS	C6H8N2	107.07059:530022 108.07394:179487 109.0773:134883		3390436	6204713	3384178	1607951	3675771	2357533	2714896	1687133	1135348	1890565	2612461	1585897	1612919	889567	1645936	2667761	1677424	1117933	941566	1785381	1892218	990544	1196762	925600	2091894	2305099	3086880	1759706	1412297	2313915	1280540	2154017	333161	1325448	1112007	2331432	3423096	1992568	823613	1071681	1866107	2653294	1394370	2747475	2153890
w/o MS2:2,6-Di-tert-butylbenzoquinone_BMDB0096105_ms_ms_11461	MS	C14H20O2	221.15291:525091 222.15626:73440 223.15962:113966		1444225	2534375	3498153	1650893	1486712	1920358	1686051	482881	4194084	1343193	2909742	838903	258373	687157	4088207	232457	2298436	1367584	271123	1542671	346562	2424666	1339860	200681	177368	281764	1593076	1107882	1435065	3416485	801435	1310842	997338	1695074	549396	909229	857429	230451	982647	1258315	426839	683979	1159238	4509051	1358203
w/o MS2:2,6-Diamino-4-hydroxy-5-N-methylformamidopyrimidine_BMDB0011657_ms_ms_299163	MS	C6H9N5O2	184.07347:16918310 185.07682:859749 186.08018:540013		88814784	90402960	88204776	88557416	90135432	92041768	90991216	91439696	30601894	29868104	29621310	139965120	141428000	133648720	41286508	41639544	40338360	257400016	251271088	250995216	119213344	117292952	119586456	89792208	89929528	90245696	77749912	78328712	76151888	124425112	125520352	127389392	25095940	25118648	25711868	94114120	93036152	92696152	154211248	152822656	150077312	94137880	93196224	94042640	227368608
w/o MS2:2,6-Dihydroxybenzoic acid_BMDB0096085_ms_ms_15639	MS	C7H6O4	153.01236:217815 154.01571:96960 155.01907:1332999		419148	278959	571689	427340	357091	331290	181222	233195	354408	536116	531798	339907	631112	140520	308918	361040	466147	401398	406322	380103	762602	789607	290092	924919	268973	437633	468139	709256	273000	79617	200784	411333	269272	303581	307727	119179	349000	265567	647924	488564	698006	982398	408048	517973	367957
w/o MS2:2,8-Dihydroxyquinoline-beta-D-glucuronide_BMDB0011658_ms_ms_287075	MS	C15H15NO8	338.08737:24678 339.09072:0 340.09408:0		45104	34194	61265	73045	38419	39186	51332	53594	4021	22890	20346	97018	76421	79504	8450	6570	2178	74653	23349	38087	72533	63287	94739	15599	11025	46753	11443	11928	3893	33981	29389	18665	12289	5123	8001	25574	67370	49839	28891	24461	24128	16036	27493	22987	19498
w/o MS2:2'-Deoxyinosine triphosphate_BMDB0003537_ms_ms_24402	MS	C10H15N4O13P3	492.98441:18584 493.98776:0 494.99112:0		25468	35370	8099	5432	48892	9160	4636	7092	5327	8015	6010	21900	40419	5624	12690	24271	15566	4049	36140	5333	5847	3813	3970	7299	37249	37757	21993	16059	7941	7046	13617	7209	274.182	9992	13063	16470	5405	12745	3253	17210	8942	6984	4151	5858	4541
w/o MS2:2'-Hydroxynicotine_BMDB0001329_ms_ms_1319482	MS	C10H14N2O	179.12607:361296 180.12942:37751 181.13278:153811		369536	963575	715431	364954	488881	500600	446094	498792	271547	413137	351943	345227	306582	373833	330704	262270	618123	597226	335572	495630	272192	481760	417040	385020	170809	325329	192658	287457	159239	412312	302252	161406	326606	274669	181977	378077	397580	383461	476508	407272	904216	224618	376945	438431	411423
w/o MS2:2',3'-Dihydro-phytomenadione_BMDB0062202_ms_ms_138786	MS	C31H48O2	451.36301:83474 452.36636:0 453.36972:0		123.154	123.154	2065	1730	123.154	123.154	123.154	2134	2256	14435	17606	123.154	123.154	123.154	1652	123.154	123.154	2645	1804	123.154	1508	123.154	123.154	123.154	123.154	1622	18848	123.154	123.154	123.154	1587	1552	1449	1401	123.154	123.154	123.154	123.154	123.154	1644	1469	123.154	3079	1475	123.154
w/o MS2:2(N)-Methyl-norsalsolinol_BMDB0001189_ms_ms_309874	MS	C10H13NO2	180.10194:388629 181.10529:125321 182.10865:24303		313228	261676	37265	155054	439604	231126	250960	81570	24227	10137	315464	499922	485259	136219	57201	45083	243591	133846	178874	316665	163387	95822	265921	64108	75724	149492	58327	28139	35405	275480	155854	121932	14648	13153	10337	63705	100365	195505	119078	118835	141803	28029	68818	33134	169576
w/o MS2:20-Carboxyleukotriene B4_BMDB0006059_ms_ms_91187	MS	C20H30O6	367.18732:4439647 368.19067:698283 369.19403:77472		8876359	8558996	8773201	8716962	8831886	9037995	8621596	8624232	11067959	10796449	10855460	19605090	19286550	16460856	8923291	9336741	9040003	5792396	5597550	5741213	11066350	10524040	10763725	13872166	13983303	14044810	16881068	16445214	16190450	8647641	8449287	8696646	2703093	2807244	2959841	5480725	5527628	5268670	8284630	8257161	8209895	11015127	11356140	10774133	6106677
w/o MS2:25-Azacholesterol_BMDB0001028_ms_ms_304025	MS	C26H45NO	388.34235:1428292 389.3457:398432 390.34906:46855		6966255	6922536	10560363	12976909	12233549	3253954	13369921	13620240	4414625	5791934	5057273	5111512	5268045	5250583	5077592	5132263	5211806	5369764	5227372	5391056	5430794	3322343	5526580	6435426	6519302	3399848	7429444	7949482	7109496	6820153	7140596	3874673	7342476	7276725	8597754	4654522	8305458	7208848	6961010	7371770	8730441	7884646	7839221	7983813	9220950
w/o MS2:25-Hydroxyvitamin D2 25-(beta-glucuronide)_BMDB0010360_ms_ms_125104	MS	C34H52O8	587.34265:194233 588.346:35436 589.34936:0		203774	270094	276278	274607	285771	271648	254989	276732	331270	439533	212925	857957	908265	870373	133933	86045	154423	185997	222940	245390	155368	327512	130470	338796	298313	191648	602266	539479	658831	413162	331548	396648	739139	736683	388675	474009	471858	497785	436228	260142	410681	436780	441596	262347	70916
w/o MS2:27-Nor-5b-cholestane-3a,7a,12a,24,25-pentol_BMDB0002126_ms_ms_304609	MS	C26H46O5	439.31992:78059 440.32327:0 441.32663:1765054		188.574	188.574	50825	188.574	188.574	188.574	188.574	188.574	188.574	188.574	20685	30150	188.574	188.574	69793	188.574	188.574	33693	352618	188.574	188.574	188.574	188.574	188.574	188.574	165298	188.574	188.574	188.574	14699	188.574	188.574	134420	188.574	188.574	188.574	1985	36855	37868	188.574	52944	188.574	188.574	188.574	30139
w/o MS2:2b,3a,7a,12a-Tetrahydroxy-5b-cholanoic acid_BMDB0000316_ms_ms_25927	MS	C24H40O6	425.27588:142547 426.27923:32984 427.28259:0		345395	726813	727257	696456	326552	723733	742957	337421	191267	200558	183819	191597	60681	461302	9942	21769	76711	384288	287545	148754	436623	266653	301352	371178	510970	473907	144416	199602	89831	137692	573133	831205	168436	501615	901263	362532	434561	443547	636299	411834	427553	285962	403515	252550	324537
w/o MS2:3 Hydroxycoumarin_BMDB0002149_ms_ms_10449	MS	C9H6O3	163.03896:317403 164.04231:257548 165.04567:65706		190449	344343	517075	1277472	1663780	1565628	780664	1131683	100913	217974	257383	2741045	2234873	1426627	243085	207915	200854	962331	1106769	1176162	457370	1412130	1126618	783951	231589	918070	160344	142310	100476	167548	61277	144832	160986	218854	153047	1127017	1252304	485812	1673802	2459214	1051228	306841	207081	406032	487572
w/o MS2:3-(3,5-dihydroxyphenyl)-4-(2-{3-[6-hydroxy-3-(3-hydroxyphenyl)-2-phenyl-2,3-dihydro-1-benzofuran-4-yl]-2-phenyl-2,3-dihydro-1-benzofuran-5-yl}ethenyl)-2-(4-hydroxyphenyl)-2,3-dihydro-1-benzofuran-5,6-diol_BMDB0096263_ms_ms_1306097	MS	C56H42O10	875.26764:322356 876.27099:0 877.27435:0		164.381	164.381	164.381	1884	2121	164.381	164.381	164.381	1831	164.381	164.381	164.381	164.381	164.381	164.381	164.381	116296	164.381	164.381	164.381	160017	164.381	319932	164.381	164.381	164.381	164.381	164.381	164.381	2015	164.381	164.381	164.381	164.381	178878	164.381	164.381	164.381	164.381	164.381	154694	1644	164.381	164.381	164.381
w/o MS2:3-alpha-androstanediol glucuronide_BMDB0010339_ms_ms_104274	MS	C25H40O8	469.27597:85890 470.27932:19515 471.28268:0		55041	82958	23519	14452	19863	18734	15396	13337	541589	504634	421313	369583	279115	293607	279056	239601	208171	110586	108853	148675	67634	139902	77061	64696	62395	103770	26981	51048	60332	99898	69048	51472	56033	13010	41377	36692	17942	27880	57821	43458	21465	49078	32590	15956	32753
w/o MS2:3-beta-Hydroxy-4-beta-methyl-5-alpha-cholest-7-ene-4-alpha-carboxylate_BMDB0011662_ms_ms_178252	MS	C29H48O3	445.36804:216555 446.37139:79632 447.37475:113212		638439	680902	587631	354364	510510	405306	515319	304884	6125	16469	12350	870621	1644909	833145	22724	6155	24304	911700	660240	405605	529106	545865	1441168	1722758	1746809	1793707	5845	3551	35033	7414	8666	6490	12531	5823	29221	1698882	964615	852612	1002485	1685195	615902	3198	5165	36704	923352
w/o MS2:3-Bromotyrosine_BMDB0095937_ms_ms_302843	MS	C9H10BrNO3	259.97443:2169808 260.97778:99852 261.98114:370835		2213501	2328366	2253980	2312954	2418554	2334658	2451391	2710565	72866	38036	2109	5633201	6110768	5685256	155618	162213	70364	4377718	4150711	4113404	2977110	2749066	1522672	1482878	956551	1583784	3319	45780	25468	675087	1359451	874129	1775	4015	14371	1550447	1563295	841351	2775809	2878814	2976482	266207	166428	114049	3522307
w/o MS2:3-cis-Hydroxy-b,e-Caroten-3'-one_BMDB0002890_ms_ms_330403	MS	C40H54O	549.41321:4620394 550.41656:1664292 551.41992:324367		97373	7947	1363654	1181865	240717	306812	882789	493253	238092	177863	195829	210545	241013	209215	212094	326795	323836	388227	260381	179495	318576	417933	229791	324703	170014	203008	107095	20082	40208	3886	28750	5295	121345	108478	400653	251244	8273134	1718484	1745045	10181726	8818192	6438658	10702424	10701690	1378563
w/o MS2:3-Dehydrosphinganine_BMDB0001480_ms_ms_179052	MS	C18H37NO2	300.28955:1387203 301.2929:205175 302.29626:71302		3337748	1859117	1845453	78570	74688	127997	1287164	151044	1444396	1412944	1411214	2180970	727976	7900254	1017601	621352	968056	5073197	5028994	2053743	5645346	1943463	5699272	7316443	7273855	7647114	78146	58420	32060	117977	1903400	1779528	465648	117727	456547	59526	31213	66440	62819	72534	31660	77315	1370635	104454	7793388
w/o MS2:3-Dehydroxycarnitine_BMDB0006831_ms_ms_316008	MS	C7H15NO2	146.11763:51635068 147.12098:4447007 148.12434:382453		564489	1236103	55273	30209	1599367	354808416	1913707	1864229	801377	844692	1115720	33398	17789	892607	8666	29906	765667	46386	50648	21309	40699	14933	854902	44855	3071992	3013274	3416908	3463148	677610	553945	1147880	1462568	35704	570993	901596	21940	41335	974814	95977	29353	3418286	18160	2998381	2238630	3779036
w/o MS2:3-Deoxy-D-glycero-D-galacto-2-nonulosonic acid_BMDB0000425_ms_ms_304515	MS	C9H16O9	269.08704:2590147 270.09039:352528 271.09375:372928		2437694	2503961	2517330	2559560	2475044	2585216	2517575	2547106	56244	176840	175030	2748642	3407964	3394069	9808923	9630909	9822647	8787864	8078438	8355313	5239392	4862378	4878886	5844878	5827981	5541945	5358004	5205043	5167422	4999924	5101108	4714995	3961531	3976076	3938485	4765016	5115640	4804618	6808740	6702504	6696116	6243284	6111460	5933104	1448875
w/o MS2:3-ethylphenyl Sulfate_BMDB0096245_ms_ms_900264	MS	C8H10O4S	203.01392:91297 204.01727:0 205.02063:0		65911	96678	113169	5905	148965	117472	140749	46815	34794	72404	19505	154747	60644	94800	123836	63734	19044	74269	27371	68805	156866	89262	75416	134433	135841	145197	154834	104642	41432	281458	212989	81021	160663	7698	6939	86479	137836	89919	192789	149260	177185	128746	109898	213096	131511
w/o MS2:3-Furoic acid_BMDB0000444_ms_ms_292134	MS	C5H4O3	113.01692:23526032 114.02027:6234119 115.02363:0		2082560	112217	326969	115340	249224	220652	174533	362239	890100	1877613	2000344	90155840	84405640	4211656	1624004	2517148	2264675	93948360	89721152	97657752	97420768	2233813	93376808	2115584	109829208	113160400	2276383	1195339	861806	2455993	2652435	97461000	3566591	1455348	320532	100092872	109278424	122770808	98988584	106226856	2869755	3532164	1276759	1147932	197611488
w/o MS2:3-Hexaprenyl-4,5-Dihydroxybenzoic acid_BMDB0001063_ms_ms_180702	MS	C37H54O4	561.39056:68257 562.39391:21410 563.39727:22040		37350	95613	78340	214776	29805	81290	55599	41719	6921	104604	20415	84446	63241	24235	19956	39393	27931	27629	18198	33408	30331	9135	50213	16724	61881	83167	48521	76096	20735	35352	75555	33046	216706	60432	326439	138230	141270	25294	53901	119054	150540	163842	192018	115853	101923
w/o MS2:3-Hydroxy-2-methylpyridine-4,5-dicarboxylate_BMDB0006955_ms_ms_309342	MS	C8H7NO5	198.05273:536612 199.05608:210601 200.05944:273599		2285	2547	746068	230307	1157889	2716	1243028	1214436	1802	1612	1750	2232	783004	3489	2237	1669	1774	2098	6635	710664	2208	1954	499513	132.164	1493	5313	1629	582278	2408	1815	857616	2187	373846	418050	384956	2039	1957	1583	3011	3022	5266	1852	1989	1509	1418
w/o MS2:3-hydroxy-3-(3-hydroxyphenyl)propanoic acid-O-sulphate_BMDB0096166_ms_ms_937584	MS	C9H10O7S	261.00854:133983 262.01189:0 263.01525:189229		5353	3342	6653	32952	2661	30845	48366	18430	1857	10611	2471	273358	724395	400136	651703	2329	553478	352806	387882	393275	434115	259689	4973	3814	251491	336597	376392	1750	296869	6266	4438	394927	1690	1426	73913	5119	5980	598358	322505	228466	217697	403885	233346	336942	184600
w/o MS2:3-Hydroxy-9-hexadecenoylcarnitine_BMDB0063645_ms_ms_1231864	MS	C23H43NO5	414.33676:69722 415.34011:23484 416.34347:0		103412	102555	78533	81827	75280	60982	93977	78694	61545	6766	279.041	33675	25474	55442	63540	64709	66121	119686	40489	57822	96067	19509	76839	54801	4885	60603	70273	4738	78476	409855	115920	116547	2844	20878	29483	33427	67137	115210	81206	91192	80869	101014	78270	33743	135347
w/o MS2:3-Hydroxy-b,e-caroten-3'-one_BMDB0003448_ms_ms_306205	MS	C40H54O2	567.4129:104285 568.41625:32950 569.41961:0		270362	181594	254146	131218	204717	156349	257109	168844	250120	152022	279442	309.771	309.771	309.771	221951	195945	179954	309.771	309.771	309.771	3138	309.771	309.771	309.771	309.771	309.771	344115	98950	416581	330800	256347	551516	143067	225351	331361	309.771	3098	4038	309.771	309.771	309.771	205342	444290	232714	309.771
w/o MS2:3-Hydroxy-cis-5-tetradecenoylcarnitine_BMDB0063644_ms_ms_1447761	MS	C21H39NO5	384.28885:397966 385.2922:130028 386.29556:15028		798465	784020	781013	783922	819490	813694	782455	810630	2235306	2256618	2260124	2022228	2042742	1988188	121821	89530	197446	461416	425952	427206	655059	673610	680152	603203	588237	548491	1206308	1210721	1217158	206995	330328	324855	1031125	1074229	1097939	555870	568752	553292	618914	620093	93438	761598	790874	772184	595858
w/o MS2:3-Hydroxyadipic acid 3,6-lactone_BMDB0096110_ms_ms_305454	MS	C6H8O4	145.04933:883244 146.05268:54851 147.05604:402845		4654429	4056725	141630	24161	131837	78255	122133	96321	6035751	35292612	34882952	87456680	2570437	8164813	58058708	61640332	1514434	3651075	6054859	4452510	5491896	3709385	9339947	1998013	4129109	3214250	258777	64983	267614	66012	508688	71735	90234224	93038	5015670	851866	192179	518980	6943280	132425	34620	80791	259000	4440790	1223006
w/o MS2:3-Hydroxyanthranilic acid_BMDB0001476_ms_ms_181318	MS	C7H7NO3	152.03586:8516461 153.03921:7479125 154.04257:661751		176000	241390	154409	130210	267868	337149	317648	219119	180695	112839	195900	43763504	140391	160745	458929	247370	105393	123704	200149	150022	69566	200740	129633	102977	56951	86299	125402	95424	165204	106182	15625241	15523824	140780	107007	239571	96488	90601	134348	191106	172677	137844	120044	107201	201585	73250
w/o MS2:3-hydroxybenzoic acid-3-O-sulphate_BMDB0096167_ms_ms_911426	MS	C7H6O6S	218.98334:951014 219.98669:217727 220.99005:192598		1744257	1384232	1880179	1644134	1878792	1768158	2034707	2056291	135697	150428	16976	2943228	3338147	3638983	229745	373045	188099	2255229	18308	1833308	1009295	1278120	4363	91196	271619	82251	128898	189716	161037	1489138	1307829	669647	163214	57125	66365	599435	451676	551562	54785	2110	51766	398793	366036	277371	623124
w/o MS2:3-Hydroxydodecanedioic acid_BMDB0000413_ms_ms_307687	MS	C12H22O5	247.15372:5845384 248.15707:777336 249.16043:139960		89951400	83518392	8616362	36135172	20330464	61870544	22083474	33685976	83053	75220	69644	256281104	25866972	64510812	50685	69601	63866	69741800	113125448	150951424	152705264	15988683	176847232	200713824	188834144	64948676	74102	47935	97876	66372	94028	36125	57708	146815	80876	134905360	11614046	136053904	234966816	226353184	237221536	116052	42526	60828	154833888
w/o MS2:3-Hydroxyhippuric acid_BMDB0006116_ms_ms_95504	MS	C9H9NO4	196.06055:1000539 197.0639:109485 198.06726:8115		3051529	3018192	2955666	3214277	2237134	2997325	1427565	2985670	1148230	2442	1824737	5918	5211	1848	2425120	2460020	1003239	5517052	5445424	5550362	12947	11936	28652	1321076	2594218	1840154	5958	10775	4227	6531	355391	21690	9511487	9608705	9739341	1096152	2019894	2213350	3226	5694	7589	342830	100093	536992	516605
w/o MS2:3-Hydroxypropionyl-CoA_BMDB0006807_ms_ms_312303	MS	C24H40N7O18P3S	840.13989:206179 841.14324:118994 842.1466:0		142639	253120	310073	31052	74152	219883	130358	142810	1326.06	77252	23649	139642	288890	39675	286056	257393	1326.06	35897	246916	104765	85463	189105	112633	49096	175367	131065	129070	98225	118755	90171	287639	231397	21918	135439	19330	35958	288818	30572	46601	1326.06	220626	250982	210746	438602	191473
w/o MS2:3-Hydroxyquinine_BMDB0001091_ms_ms_343578	MS	C20H24N2O3	339.17853:62999 340.18188:0 341.18524:0		256386	338360	167490	388362	323666	225066	321155	201969	11526	3167	4104	42879	243640	2872	47221	16008	195136	196039	249972	150014	146749	252486	5683	158521	195588	8531	13061	223366	23401	5459	219392	226401	4501	114110	3254	214994	220894	176663	160418	231190	283136	3449	6429	179949	8662
w/o MS2:3-Hydroxytetradecanedioic acid_BMDB0000394_ms_ms_162376	MS	C14H26O5	273.16733:2983962 274.17068:426556 275.17404:62751		2793001	3574128	1381843	557412	4170561	4377223	3124143	2466227	517320	917554	607022	519451	501689	589833	12578054	392016	1358800	1940414	595917	481823	517797	868239	1468883	1632951	511569	2395426	826331	1181876	767086	514129	367760	12058242	581374	4885538	4722336	5171786	2469506	882347	595828	406098	414704	469911	670229	10918009	1995099
w/o MS2:3-Indoleacetonitrile_BMDB0006524_ms_ms_21473	MS	C10H8N2	155.08133:531254 156.08468:294092 157.08804:190385		3088421	2781608	2667502	2436326	2390327	2715477	2582917	2609261	3299491	3264860	3604419	3156766	9533737	1814117	1054856	1884266	2244248	2495999	2513033	2390859	3132665	1187568	513564	2761060	2974384	2872646	3091740	3220852	2585757	4674854	4307379	4572420	93143	329746	795978	2696460	2897193	3398988	3966498	3570098	3556466	4964116	4546139	4961224	2268500
w/o MS2:3-Iodothyronamine_BMDB0096229_ms_ms_884658	MS	C14H14INO2	356.02133:244760 357.02468:0 358.02804:0		1307.26	37845	85088	35924	64583	1307.26	26796	1307.26	1307.26	19264	22896	52860	64050	189287	26584	31040	17163	80071	119317	1307.26	1307.26	27751	21612	1307.26	36923	26198	30255	22571	27350	36652	1307.26	19998	1307.26	1307.26	28641	28455	26307	13837	1307.26	19968	1307.26	22371	13324	18392	305078
w/o MS2:3-Mercaptolactate-cysteine disulfide_BMDB0006512_ms_ms_125482	MS	C6H11NO5S2	240.00284:223519 241.00619:36718 242.00955:0		553389	521199	686662	335384	703844	211035	837746	6769	262042	540351	397423	61771	576967	485958	383164	3674	26535	2379	470575	12120	2450	517065	283680	10801	2978	22180	6692	394907	250068	4724	243330	263816	63402	333566	56066	8324	497879	31437	479033	2043	394799	10204	7400	420391	467935
w/o MS2:3-Mercaptopyruvic acid_BMDB0001368_ms_ms_294095	MS	C3H4O3S	120.98091:378274 121.98426:0 122.98762:0		56954	18882	680512	41362	160248	971667	410718	25324	22568	20567	25786	1175118	1102232	560005	87224	12584	70674	729517	770291	1505368	18267	698110	1182835	41311	10865	18651	91126	143302	49633	452796	184501	89151	114213	199485	39055	13380	695680	14002	400300	369034	37116	51128	18003	7502	548297
w/o MS2:3-Methoxy-4-hydroxyphenylglycol glucuronide_BMDB0000496_ms_ms_141066	MS	C15H20O10	359.08997:63799 360.09332:258202 361.09668:0		152.184	152.184	152.184	152.184	152.184	152.184	37607	152.184	83904	152.184	152.184	58869	152.184	152.184	152.184	152.184	152.184	152.184	152.184	152.184	33945	152.184	152.184	112386	170904	152.184	111667	152.184	152.184	152.184	1839	152.184	152.184	152.184	28471	37993	41857	23648	1522	1866	152.184	152.184	86299	152.184	25842
w/o MS2:3-Methoxytyrosine_BMDB0001434_ms_ms_122727	MS	C10H13NO4	210.08672:940660 211.09007:86990 212.09343:0		2272688	3599353	1578246	2618725	1165790	2186452	1802298	1741119	6865036	6919998	6965719	4900228	7281619	7121818	6838232	6534246	6482784	3030142	2652104	4198525	2476012	3513369	1715702	2384900	4058871	2930059	5164844	5227432	5054678	3863416	1921001	3617712	840566	387711	583204	1203072	1718467	1969870	2364160	2830153	2943164	2170350	3606750	2223622	3768758
w/o MS2:3-Methyldioxyindole_BMDB0004186_ms_ms_291505	MS	C9H9NO2	164.06651:16871880 165.06986:2926910 166.07322:2774205		2400052	1474352	2487578	836855	816309	2044262	936671	1251540	57038216	60017056	56642680	61036196	56185504	1275313	61698540	62258568	57765356	59044756	58213728	59800552	59575744	59599212	59509244	56399156	59451904	55449688	55271364	54921852	59596988	59258288	60336276	59240140	1582255	2040532	1364223	60342748	57619296	55578392	57076360	59819652	59047292	55979344	60884096	60075604	49753012
w/o MS2:3-Methylene-indolenine_BMDB0011664_ms_ms_347299	MS	C9H7N	128.04565:2127244 129.049:249740 130.05236:136132		192095	634605	2641358	327531	214953	2144764	219226	1696579	116042	1436662	497012	179518	2108233	1416551	123560	81287	153414	2688110	155637	108468	297539	319060	233057	165186	146986	201167	110067	54842	179441	2765736	168466	88603	2949080	2134376	58155	157263	233195	231857	181251	167264	152960	123001	36690	44770	121828
w/o MS2:3-Methylsulfinylpropyl isothiocyanate_BMDB0006095_ms_ms_145463	MS	C5H9NOS2	162.00711:1836556 163.01046:303834 164.01382:0		4791833	16359	4644492	4904120	4415083	4631578	2382579	4725018	172696	32664	124592	7948012	7806894	7659244	176197	17894	59741	7100008	7271840	6935134	6034430	5730584	6084189	30064	4258496	3788164	20201	11968	12077	26769	8124	1058215	7957	47122	18385	4047918	10282	4129510	5939291	3363484	5669955	25932	13963	33125	6011800
w/o MS2:3-Methylthiopropionic acid_BMDB0001527_ms_ms_168726	MS	C4H8O2S	119.01384:1327792 120.01719:5733512 121.02055:2081368		192945	181062	352742	255449	213259	156862	194834	194145	699182	1245971	996694	562230	1262027	172354	440079	1155378	1298088	215643	522746	2209643	1584773	4107771	1920680	1370084	4937275	1804335	5396240	581587	1702713	396697	1074009	664269	229271	370193	373978	856036	1562099	2696157	328603	2031581	2257719	1727324	2814001	2046990	6061378
w/o MS2:3-Nitrotyrosine_BMDB0001904_ms_ms_257159	MS	C9H10N2O5	227.06659:69206 228.06994:0 229.0733:0		77149	60913	96015	54774	138407	167081	121807	124815	14356	35239	35218	50515	175299	115411	18168	50501	53878	179464	26670	288302	127813	65309	47137	80504	11075	51417	68819	39495	59326	98722	78028	129362	20061	19655	37348	110865	125568	122663	64923	90436	40992	46925	82264	107698	84435
w/o MS2:3-O-Sulfogalactosylceramide (d18:1/16:0)_BMDB0012313_ms_ms_1383497	MS	C40H77NO11S	778.51715:168187 779.5205:47276 780.52386:0		272.766	3923	272.766	272.766	5334	272.766	5284	4303	272.766	2875	3280	5352	272.766	272.766	4789	272.766	272.766	272.766	272.766	272.766	272.766	4076	272.766	3779	272.766	272.766	272.766	3399	272.766	272.766	3865	3515	272.766	3807	3319	4831	272.766	272.766	272.766	3035	272.766	3504	272.766	2728	3258
w/o MS2:3-O-Sulfogalactosylceramide (d18:1/20:0)_BMDB0012315_ms_ms_1261046	MS	C44H85NO11S	836.59796:112445 837.60131:0 838.60467:101659		274.114	38073	5415	4151	3563	34625	274.114	274.114	3503	44855	274.114	66359	26447	274.114	54597	74299	19680	274.114	34066	16458	274.114	17236	18899	24430	274.114	35943	274.114	274.114	19186	30523	3573	274.114	25263	23803	274.114	15781	3265	4280	274.114	17504	4267	274.114	30084	274.114	2889
w/o MS2:3-O-Sulfogalactosylceramide (d18:1/22:0)_BMDB0012316_ms_ms_1308063	MS	C46H89NO11S	864.60028:1034916 865.60363:0 866.60699:275126		123.496	123.496	123.496	2109	3807543	123.496	123.496	3468652	123.496	2080	1449	123.496	3524618	3519424	123.496	1929	123.496	123.496	27276	4217544	2869788	3177653	3039821	355479	123.496	123.496	1553	1605	27415	26282	123.496	1813	2515130	2498274	2042688	3427140	123.496	3650667	123.496	3669350	123.496	1267	13518	1414	32712
w/o MS2:3-O-Sulfogalactosylceramide (d18:1/24:1(15Z))_BMDB0012318_ms_ms_1340127	MS	C48H91NO11S	888.6106:398321 889.61395:385855 890.61731:370709		672424	711204	707280	422259	171105	719773	672959	248095	452108	218393	556978	331617	554096	658917	863091	1267406	1132667	732882	869104	633181	603291	606886	392581	271245	408078	403484	692282	847479	563968	857253	806798	791539	367929	295224	364261	413660	545996	127784	468651	604827	382868	361903	1043718	737042	186840
w/o MS2:3-O-Sulfogalactosylceramide (d18:1/26:1(17Z))_BMDB0012319_ms_ms_1345400	MS	C50H95NO11S	916.65936:451754 917.66271:229805 918.66607:0		2206.07	1165357	1918906	955380	1245388	1959002	1918322	2206.07	2206.07	2206.07	2206.07	2409464	1766662	2206.07	2206.07	2206.07	417777	851674	2206.07	588346	766733	2252258	2206.07	747648	2206.07	2206.07	667969	2206.07	374923	608491	689989	2206.07	2181885	2206.07	684808	613482	1145332	716660	1907121	962864	2206.07	869002	2206.07	850054	2613688
w/o MS2:3-Oxo-4,6-choladienoic acid_BMDB0000476_ms_ms_320572	MS	C24H34O3	371.25809:69386 372.26144:30180 373.2648:0		5137	155065	4377	174928	6256	4596	125143	119862	3126	4390	3168	3591	6375	2714	3001	3508	3805	9263	3636	4226	36315	3917	7740	15148	4982	4470	3261	5332	6472	8128	3361	3863	283635	185036	207638	4775	107682	172603	3196	8261	3737	4332	160814	31722	3870
w/o MS2:3-Oxoadipic acid_BMDB0000398_ms_ms_351218	MS	C6H8O5	159.02388:510210 160.02723:0 161.03059:144692		86903	88245	65361	86275	1490406	151257	153868	3176434	62871	55406	97459	1475298	2387000	76161	138740	33645	120029	2270810	68995	108415	57290	846574	1510881	42522	1527785	91729	90860	45670	120185	87974	82976	58611	80728	53208	717050	33418	61017	32284	70961	54647	911046	130868	1456925	63914	33624
w/o MS2:3-Oxodecanoic acid_BMDB0010724_ms_ms_183014	MS	C10H18O3	185.11478:5511347 186.11813:528422 187.12149:678954		46808828	94225232	101800752	111067544	102388952	99103656	102560576	102062480	1720984	847211	2440263	4750176	891072	2040224	3308830	3853924	3259764	2908139	78367000	4656842	81651272	79205096	82227040	80210136	78216192	41895848	41166252	53956412	54878952	92838136	94772024	49743992	48787024	56282820	41607824	43954532	47982644	48154236	50747636	82959024	85131824	93827272	90088224	5383555	49979332
w/o MS2:3-Oxododecanoic acid_BMDB0010727_ms_ms_182765	MS	C12H22O3	215.15738:1412441 216.16073:337817 217.16409:234650		3121551	3044119	5894282	1767305	1019918	2218559	427785	2465926	2001410	129642	2233952	4177350	1349279	511364	2284192	1164016	1900862	304382	4083663	1475242	1792635	230947	2858506	1357148	1249981	5636682	1313999	884174	1103762	3497852	1714291	2166371	3797702	4679630	3474455	906646	2097962	1560032	318779	1858008	2544817	3911334	3116611	2081983	3877942
w/o MS2:3-Oxohexadecanoic acid_BMDB0010733_ms_ms_182719	MS	C16H30O3	271.22668:571753 272.23003:138082 273.23339:42273		2305772	1919164	583005	2181458	3635136	1166350	3001679	1417714	1117004	538596	682254	469691	1898791	578340	649787	405444	568161	826671	397516	788996	748330	707094	802731	4165228	1601363	5705408	874628	1437524	1290152	1756120	1476683	1413608	450360	909090	552879	636996	1565321	689555	387639	465782	427245	587748	764983	311921	318567
w/o MS2:3-Oxooctadecanoic acid_BMDB0010736_ms_ms_319713	MS	C18H34O3	299.23618:351443 300.23953:131449 301.24289:396084		246351	371047	157397	292855	140624	62510	276921	580670	107810	206231	73908	603663	83457	87464	215487	130444	91184	686772	138664	87637	69251	87872	160709	127963	100453	144192	50588	169225	185271	109124	148532	192923	101934	468135	519039	80521	63606	92912	166288	104293	102418	215636	126799	161257	90566
w/o MS2:3-Oxooctanoyl-CoA_BMDB0003941_ms_ms_30809	MS	C29H48N7O18P3S	906.18188:94189 907.18523:0 908.18859:0		155908	60502	76720	97407	146279	205212	98292	139446	11578	18359	10404	6107	2709	4160	8302	49683	47934	2722	214.764	2736	2641	214.764	2444	214.764	3144	214.764	27795	71521	66080	434346	514034	400480	16170	28088	19641	214.764	3773	214.764	214.764	2512	214.764	426244	189539	283308	3608
w/o MS2:3-Oxotetradecanoic acid_BMDB0010730_ms_ms_182711	MS	C14H26O3	243.1955:392579 244.19885:186206 245.20221:55498		493576	810113	483021	964445	902113	384079	633811	756596	2263596	841355	1006662	1222737	1301372	796294	69684	116449	60151	85801	82543	60026	75991	75657	43003	540004	684794	1288557	1593771	1699105	98887	86157	49387	77780	551359	30751	94534	1033360	78561	385468	65568	450560	64942	380514	31902	148593	62291
w/o MS2:3-Pyridylacetic acid_BMDB0001538_ms_ms_288250	MS	C7H7NO2	138.05505:1006933 139.0584:426347 140.06176:37596		5538790	5373850	5635108	5507034	5577106	5715205	2703912	5487472	4552393	4377980	4388838	7858137	8171964	8009329	408046208	4418510	59476	560288448	2138993	2174981	612937536	6323032	6360199	600926464	5557852	5390063	5654452	5704037	5981820	6810192	3232281	6632844	3515732	3739739	3687136	5056616	5197247	5169538	5015186	5119065	1706769	5555230	1056636	5584468	1560226
w/o MS2:3-Sulfinoalanine_BMDB0000996_ms_ms_263425	MS	C3H7NO4S	154.02625:361486 155.0296:66132 156.03296:0		1934559	1797449	1928843	1508214	718388	1682313	1925922	1045743	419891	425347	694682	949140	2084175	1225555	1590618	1510685	548154	1863638	1533179	436377	1709856	683080	955970	779296	1071679	1530179	1684459	1777594	1040360	1319373	1114112	1257111	587136	912259	1315464	1370925	1359826	1953904	762277	1456573	992250	1145664	765992	772259	1067720
w/o MS2:3-Sulfinylpyruvic acid_BMDB0001405_ms_ms_353771	MS	C3H4O5S	150.97635:36277 151.9797:0 152.98306:133540		28146	84079	11616	30230	8158	16978	25580	33952	30250	65175	16667	84496	71015	47610	47514	32188	15420	54975	92727	41717	64477	35763	132991	41976	53399	21958	11858	20099	14431	7878	13846	7676	15041	10890	24829	15277	21490	13770	34675	62981	17872	41380	11172	17491	17764
w/o MS2:3-Sulfodeoxycholic acid_BMDB0002504_ms_ms_1245960	MS	C23H38O7S	459.25681:65981 460.26016:0 461.26352:0		85652	24208	52636	5570	20669	10480	5727	4365	2678	2939	3211	180498	42810	13189	3669	3132	248.32	17580	22033	11378	92717	103442	22076	152999	20066	231291	2817	5891	3239	3097	3383	248.32	3240	9765	10740	11540	35426	364657	384989	85901	204660	2749	3200	5961	284829
w/o MS2:3-Sulfopyruvic acid_BMDB0004045_ms_ms_32620	MS	C3H4O6S	166.9543:754018 167.95765:220686 168.96101:52651		29875	182473	15230	10136	31198	16579	18853	17543	31316	29432	11787	13467	14086	9944	6378	3717	31325	29909	16357	11826	31677	9287	22485	40924	25890	20286	40198	27241	74731	15969	12722	30980	17697	4207	2969	17443	11046	17228	10067	17529	15580	13401	74784	23222	1333554
w/o MS2:3,3',4'5-Tetrahydroxystilbene_BMDB0004215_ms_ms_179992	MS	C14H12O4	245.08258:2148337 246.08593:297785 247.08929:221027		1023743	443438	47162	2092341	50736	29704	45091	54588	3353448	1117119	3199253	1067691	1513175	1020571	752973	520012	51781	957008	957442	753474	1265025	1457459	1930560	1632801	2671426	2677616	496505	53457	1029521	620379	1404487	19699	2240929	1365756	2336931	793819	742564	1737417	525049	1387117	434077	3474299	3590394	71640	76890
w/o MS2:3,4-Dihydroxybenzylamine_BMDB0012153_ms_ms_294190	MS	C7H9NO2	140.07062:182640 141.07397:384468 142.07733:1043147		77004	164404	164661	75818	94505	151101	77612	152950	39152	73471	106525	26515	66862	71676	57273	76332	128487	121037	91134	124300	75462	123996	70560	88391	55351	67742	63114	132802	46856	80425	89682	119564	119263	76236	125476	29531	66045	49371	32366	77543	76772	24477	87785	53318	43295
w/o MS2:3,4-Dihydroxyphenylglycol_BMDB0000318_ms_ms_12798	MS	C8H10O4	171.06451:226655 172.06786:0 173.07122:664624		17599	9689	13808	19057	12233	4905	19475	13728	6516	23238	14481	1017812	45538	975485	10374	15859	7678	24682	45963	33671	25348	16640	29481	26662	60139	9837	11117	10524	17369	6572	15665	6685	22832	7154	8590	21713	12365	20033	16448	8007	12019	24515	381628	7249	28509
w/o MS2:3,4-Dihydroxyphenylvaleric acid_BMDB0096123_ms_ms_241312	MS	C11H14O4	211.09665:1010701 212.1:420359 213.10336:397601		193004	470660	192924	184957	153695	33556	204667	42087	103261	172085	56963	28816	56371	48433	20750	41123	45733	510061	774245	599987	44690	32887	35126	41077	24165	109451	297012	28153	58723	36483	41572	23988	16946	14540	38706	26195	11891	58528	17713	15645	44905	32798	31657	46234	30955
w/o MS2:3,4-Dimethoxyphenylethylamine_BMDB0096131_ms_ms_319330	MS	C10H15NO2	182.11725:353591 183.1206:93313 184.12396:0		861118	905186	754451	935492	902497	920368	621304	990666	1013228	883615	942880	1086523	1085470	848682	460196	147910	170613	599506	391110	471378	682677	354668	438198	359762	912843	366746	930717	298059	561459	389926	391205	538706	746044	565207	229506	468675	258664	427043	756056	554295	889551	492839	835038	801728	1276961
w/o MS2:3,4,5-trihydroxy-6-({2-[3-(7-methoxy-2-oxo-2H-chromen-6-yl)oxiran-2-yl]propan-2-yl}oxy)oxane-2-carboxylic acid_BMDB0096260_ms_ms_1441398	MS	C21H24O11	451.10077:78922 452.10412:13943 453.10748:0		105985	141565	129824	193393	156811	181139	130018	120464	132886	225032	189277	53674	12247	60366	293914	219642	247332	4277	20999	4408	5384	11076	5112	13092	20801	54577	510970	286132	163277	291614	507346	325325	108122	248587	236012	50044	16347	23702	43275	29010	21385	250235	228868	290641	6870
w/o MS2:3,4,5-Trimethoxycinnamic acid_BMDB0002511_ms_ms_318929	MS	C12H14O5	239.08897:8363637 240.09232:889287 241.09568:79048		11673268	58538444	236505728	4849087	226051200	83259552	91107456	106451616	61428560	133292896	54904028	263071200	259219296	286160000	71285448	142452832	153939568	16783442	21161754	25479552	18418088	48703028	72595168	275956096	2410277	284130368	7219380	7321149	580372	6506978	37526284	41246940	43425776	6980388	3964926	270502048	274969952	165347824	159455984	134199168	153884288	146206368	45563700	66170208	98681168
w/o MS2:3,5-Diiodothyronine_BMDB0000582_ms_ms_332482	MS	C15H13I2NO4	523.88397:224368 524.88732:96987 525.89068:0		476.495	5687	476.495	955666	61087	476.495	476.495	476.495	476.495	476.495	476.495	476.495	476.495	476.495	23388	476.495	476.495	476.495	50086	476.495	476.495	476.495	476.495	476.495	5604	476.495	476.495	476.495	4855	6554	22171	16346	476.495	476.495	476.495	476.495	476.495	27368	476.495	6638	31119	476.495	476.495	476.495	476.495
w/o MS2:3'-AMP_BMDB0003540_ms_ms_25917	MS	C10H14N5O7P	348.05325:245279 349.0566:0 350.05996:54806		303368	288123	763356	460522	841258	801960	779751	870783	608496	489114	1102114	706232	586454	629540	397067	1130268	1153720	709070	471754	571356	760753	638574	438340	392103	705055	718694	433957	726313	607274	506608	590183	513117	265385	253155	168033	420804	937275	1026294	645155	921546	888786	873841	923343	672226	786467
w/o MS2:3'-Ketolactose_BMDB0001030_ms_ms_318553	MS	C12H20O11	341.09372:356960 342.09707:74478 343.10043:0		1858948	3322799	3436984	27352	3551302	3337727	2083916	1889178	1798685	1102814	1759675	3475700	2799591	1171612	1879950	2266071	3378137	1794802	1922377	1146523	564667	3481223	1651961	2204501	3415614	2244024	3172030	1532808	2196780	1954101	1925374	3392872	1568432	1594402	3132944	1642853	2110251	1672306	1732679	1689415	1336811	1881787	1744938	1512832	1315516
w/o MS2:3'-O-Methylguanosine_BMDB0006038_ms_ms_312267	MS	C11H15N5O5	298.11487:2736730 299.11822:403056 300.12158:568585		9909343	9760988	10052225	10167861	430732	394192	411794	245120	10433790	10490989	10519258	10335147	10061906	10861714	12884843	12686214	12628552	11592713	11504273	11468187	11234934	11333271	11424356	10342634	10355781	10528327	10963214	10794452	10628443	9871534	9813851	10048143	10950490	10913866	10542791	10226555	9855442	10335658	10080417	10408855	10301820	10122903	10106013	10121206	8981823
w/o MS2:3a,11b,21-Trihydroxy-20-oxo-5b-pregnan-18-al_BMDB0006753_ms_ms_311574	MS	C21H32O5	365.23041:109635 366.23376:15503 367.23712:70691		6130	9080	28679	28935	4692	24730	28331	31884	2851	3010	6124	17318	176037	3641	3479	3836	3174	4210	13478	3911	26122	3929	3976	201568	4015	142318	3148	3450	2885	2823	3711	3079	3222	2906	2957	17456	8931	25408	147640	173449	132342	3010	2896	2585	223374
w/o MS2:3a,16b-Dihydroxyandrostenone_BMDB0000309_ms_ms_353153	MS	C19H28O3	303.1991:566853 304.20245:111449 305.20581:59198		998930	971699	989338	954473	1037362	1034788	1021883	986169	3362421	3369179	3313041	2746796	2731214	1473298	574966	400079	7044	270126	124438	4193	16735	3189	255924	3277640	3324950	1851855	1612478	2743345	2672874	170584	185759	6360	3025453	3085465	3077546	715024	948549	447430	698103	785079	748910	627579	1099464	1122883	65107
w/o MS2:3a,4b,7a-Trihydroxy-5b-cholanoic acid_BMDB0000320_ms_ms_23915	MS	C24H40O5	409.27982:231162 410.28317:34146 411.28653:0		4757	326886	3744	607022	3375	36630	4027	597377	11498	3238	3030	605574	397612	33501	4262	8011	2774	6342	670691	424603	894523	423810	1277256	455849	960010	728417	3389	2891	3259	5655	7458	8123	3504	3748	4136	568780	1388270	1142434	1499422	1126222	1130484	3350	3216	2735	1302581
w/o MS2:3a,7a-Dihydroxy-5b-cholestanoyl-CoA_BMDB0002159_ms_ms_24364	MS	C48H80N7O19P3S	1184.47473:219478 1185.47808:0 1186.48144:0		137798	150229	162107	148688	84193	100968	123200	125399	40208	136944	67331	59770	158686	34468	451290	594379	222009	148390	120529	106355	31010	118865	183215	35807	188948	211781	297939	122925	224711	208758	376237	168576	65326	99537	44900	199081	47452	108386	185268	109300	146285	309445	376287	474679	21638
w/o MS2:3a,7a,12a-Trihydroxy-5b-cholestanoic acid_BMDB0003873_ms_ms_137202	MS	C27H46O5	449.32349:226191 450.32684:66778 451.3302:0		159208	88544	122445	125500	96388	115451	96834	6378	329046	651363	413068	375691	65143	15467	152812	124914	80242	89303	106869	4654	51022	107748	83853	3226	230168	19264	15847	1043630	76867	80944	309947	63202	19871	3328	13852	69181	23774	22899	32079	3717	3291	3721	7413	146677	92468
w/o MS2:3a,7b,12a-Trihydroxyoxocholanyl-Glycine_BMDB0000331_ms_ms_1248241	MS	C26H43NO6	466.31717:885317 467.32052:242992 468.32388:43628		2796500	2794010	2889410	2801940	2709577	2741682	2723045	2692591	2005317	2036104	2044761	2048007	2189952	2059616	2836395	2808075	2815940	2243823	2199584	2237935	2276268	2365368	2264626	1753182	1700751	1685830	2973978	2969166	2849243	2564460	2598386	2619840	3457093	3478535	3438691	2069301	2055795	2136682	2218290	2436479	2302571	2246048	2323907	2318657	2356510
w/o MS2:3b,17a,21-Trihydroxypregnenone_BMDB0000382_ms_ms_301529	MS	C21H32O4	349.22147:74541 350.22482:0 351.22818:0		3838	11834	10157	5756	6915	3145	10842	3211	56439	3325	9045	55119	3763	15460	6680	3350	7435	5218	13179	5777	7873	4741	3506	7987	19281	5446	10507	11180	18401	3541	17348	30215	14782	7795	21537	5926	8237	6686	13880	13059	6863	14394	2366	11369	15013
w/o MS2:3beta,17alpha-Dihydroxy-5alpha-androstane_BMDB0109614_ms_ms_263322	MS	C19H32O2	293.24701:496525 294.25036:107899 295.25372:1008166		24115	60841	849561	74834	73642	82235	112858	86602	170174	73799	195534	790319	111311	571104	785210	20387	1038124	549856	650000	43765	132011	92302	279038	105831	79465	1365532	26959	218910	61006	36705	80864	67994	40598	64601	218209	46499	40545	36997	36925	49063	97405	40793	52132	48376	475362
w/o MS2:3beta,7alpha-Dihydroxy-5-cholestenoate_BMDB0109594_ms_ms_906366	MS	C27H44O4	433.33154:5132746 434.33489:1865674 435.33825:249037		429192	919930	9654246	273244	998136	418279	525523	1187638	247845	92302	106790	1453998	279360	185391	3098200	126805	5616044	1406575	11946615	2976466	361585	228720	1462530	232678	220149	14233051	179611	740811	1081059	1664015	479560	510830	1451427	1513947	261841	259254	486277	243926	247012	316758	548399	789383	955694	587987	2456654
w/o MS2:3D,7D,11D-Phytanic acid_BMDB0000417_ms_ms_128800	MS	C20H40O2	311.31299:532384 312.31634:479453 313.3197:63417		171381	149106	123083	161462	229750	102852	191319	105126	117617	123356	155207	81137	120327	107809	53412	68086	70034	108095	1144109	103173	92731	126332	46547	144698	193103	1722078	70640	169829	107525	114101	173411	83938	108503	92163	69893	167003	54446	113363	71021	73914	71348	87339	60727	178103	128932
w/o MS2:4-(1,1,3,3-Tetramethylbutyl)-phenol_BMDB0096109_ms_ms_49829	MS	C14H22O	207.15906:954099 208.16241:144891 209.16577:135840		4334480	3978784	1271344	1639260	4379166	2605080	1296071	1844296	942301	5521448	2506516	6809860	1846533	7741970	845094	1112506	462838	3715686	3138350	4542494	5235010	2368966	4487341	7753950	9056981	15053512	851186	666293	787046	471182	657049	461273	895506	579284	439726	7002252	1235230	2778043	11121835	5116070	3292129	622531	1041915	699008	1224883
w/o MS2:4-(2-Amino-3-hydroxyphenyl)-2,4-dioxobutanoic acid_BMDB0004083_ms_ms_300408	MS	C10H9NO5	224.06302:508999 225.06637:487160 226.06973:47562		510306	12815	26322	27052	34222	38244	34469	29568	56858	36131	51820	22263	35336	34601	18233	18334	49252	19081	42130	10878	8947	14454	14123	16021	15427	26573	22387	642366	33319	17414	26588	18694	28995	14398	17007	21173	9394	16153	2720028	32271	28420	42845	10294	23521	23398
w/o MS2:4-(2-Aminophenyl)-2,4-dioxobutanoic acid_BMDB0000978_ms_ms_27834	MS	C10H9NO4	208.03911:1493786 209.04246:0 210.04582:0		3092508	3217388	3356438	3471099	3318761	2072381	3334484	3715190	536092	95558	628122	3872972	7178196	3682172	682390	1001719	723034	6430308	6001581	5997969	2879266	5114490	5029270	3555788	3449079	3262659	147107	112715	98908	1278426	2322805	2088752	71054	202680	193540	3401834	1841565	3245255	4818799	2842850	4808970	803552	330250	266993	5279938
w/o MS2:4-(Methylnitrosamino)-1-(3-pyridyl)-1-butanol glucuronide_BMDB0096225_ms_ms_916980	MS	C16H23N3O8	386.1564:113599 387.15975:15565 388.16311:0		197697	172763	121823	159897	115444	93616	345009	91002	127661	144142	24323	142525	3196	268.716	136813	3751	116189	588248	302904	179427	146589	333034	203965	235439	182414	117096	179984	3159	268.716	3037	131593	181307	268.716	268.716	3347	3378	268.716	268.716	268.716	142211	123750	27539	195401	43333	366850
w/o MS2:4-(Methylnitrosamino)-1-(3-pyridyl)-1-butanone_BMDB0011603_ms_ms_122467	MS	C10H13N3O2	206.0905:1467380 207.09385:131545 208.09721:0		781865	654154	2350189	1050439	1404577	524835	316097	1369367	2370884	319328	311754	582238	305259	477385	304581	475264	552948	1461231	421608	301025	217188	308732	1436930	839114	822407	605402	528710	515746	1189402	1999772	2690553	373603	3007664	1130269	428787	426436	1133776	1233771	631103	1073743	520513	620530	992900	1090305	206931
w/o MS2:4-Aminobiphenyl_BMDB0096032_ms_ms_93240	MS	C12H11N	170.09644:1250588 171.09979:118926 172.10315:296320		6253548	5428073	2140924	2913074	5438372	9120089	4093542	3505833	2986243	4335488	4810758	2523493	2639480	1344712	4143632	1088350	3951574	3418139	2203836	4288851	3370111	4936319	3731833	4528648	4101377	3802716	1039386	2966841	1264076	4985458	1130405	2444896	1617162	4373435	2947785	5136015	3751747	5081698	1214127	2917545	1786540	4624981	1214509	4499578	4299322
w/o MS2:4-Aminophenol_BMDB0001169_ms_ms_313519	MS	C6H7NO	110.06023:647232 111.06358:181572 112.06694:2372991		2162665	2438282	850223	2170891	1197082	1371048	2544668	2433877	1227077	1695806	1734824	2189186	2603116	3206364	1273760	2051495	923980	1420549	2684102	1359596	952227	2648757	955430	2810312	2843878	2363117	985231	1408507	2207974	2878042	2500122	706554	1478448	1746716	1847506	2524706	2597220	2555074	1209910	923073	1582470	1419973	1126981	1002392	1128551
w/o MS2:4-Chloromethandienone_BMDB0004634_ms_ms_293382	MS	C20H27ClO2	335.16779:225197 336.17114:0 337.1745:0		194078	2802	153.774	130630	153.774	153.774	160540	1888	153.774	153.774	2295	153.774	153.774	1794	153.774	153.774	153.774	153.774	1973	153.774	55985	153.774	136648	176915	231641	167619	1731	2066	180502	158781	294625	120598	153.774	153.774	153.774	2065	97582	1723	137326	2487	153.774	153.774	153.774	153.774	1591
w/o MS2:4-Fumarylacetoacetic acid_BMDB0001268_ms_ms_118519	MS	C8H8O6	199.03238:925077 200.03573:57670 201.03909:38166		3285698	3193996	3330640	3336678	3359875	3484463	3401034	3503430	994944	1624276	1723970	4298389	1812600	4408404	1636268	720811	1048319	2737643	3238227	3304946	1220440	3191764	3125920	2801182	1971855	1357659	1568133	1448381	2264199	3422698	3584781	3628045	480395	674883	349637	1596652	1608296	2007902	2149560	2224173	1596620	3491008	3510943	3606342	4286886
w/o MS2:4-Hydroxy-5-(3',4'-dihydroxyphenyl)-valeric acid-O-glucuronide_BMDB0096169_ms_ms_913972	MS	C17H22O11	403.13834:232656 404.14169:37716 405.14505:0		37719	18077	17300	4082	31115	18880	14529	7832	237.509	3087	2957	3517	237.509	2870	4493	3044	3955	13165	4934	21830	1863547	964083	967394	3197	4364	3816	237.509	3351	2884	2871	3378	3275	3736	3991	2942	3428	8831	237.509	7579	3668	3318	3016	3381	237.509	408973
w/o MS2:4-Hydroxy-5-(3',4'-dihydroxyphenyl)-valeric acid-O-methyl-O-glucuronide_BMDB0096170_ms_ms_916088	MS	C18H26O12	435.14786:386421 436.15121:56078 437.15457:0		988048	1088854	1171962	1149380	1301773	1207357	1272693	1175355	1184912	1237540	1233036	901955	929275	1102376	1524329	1529531	1439723	1173305	1257416	1046539	1174562	1246619	1216592	1222191	1158694	1294316	1139087	1176097	1248675	1091388	970073	1115173	846159	877126	843857	1022913	880323	936479	1167724	992443	1066950	1090158	1116160	1116979	1177056
w/o MS2:4-Hydroxy-5-(3',4',5'-trihydroxyphenyl)-valeric acid-O-methyl-O-glucuronide_BMDB0096168_ms_ms_947370	MS	C18H24O13	447.11823:74912 448.12158:0 449.12494:0		78586	35667	69162	13781	77937	105863	120862	109245	35779	64372	76679	75536	21593	75832	37189	23632	38852	148901	64977	145233	578536	27562	264812	41329	48513	37027	96431	358046	356211	161706	166597	152650	16015	23847	45332	27414	25208	42418	63981	72221	28285	30129	44982	24954	16538
w/o MS2:4-Hydroxy-5-(4'-hydroxyphenyl)-valeric acid-4'-O-sulphate_BMDB0096174_ms_ms_915009	MS	C11H14O7S	291.06476:76506 292.06811:0 293.07147:0		213105	218725	246081	150952	184732	162584	182229	128254	71054	99575	72390	256509	471632	291925	129379	63041	30298	129597	107801	85830	144921	153981	22076	142633	107246	153860	142911	98500	59693	96107	92148	124892	38897	24451	39794	101672	315655	305933	61942	282775	244128	125181	89087	156039	80479
w/o MS2:4-Hydroxy-5-(dihydroxyphenyl)-valeric acid-O-sulphate III_BMDB0096177_ms_ms_881504	MS	C11H14O8S	307.04745:99638 308.0508:0 309.05416:0		125474	137638	44798	160540	80964	124162	172135	107059	7274	61200	39166	275727	109304	3017	3692	29905	45964	9675	147900	102471	9325	5945	267342	8880	112227	117483	120599	135534	3513	127117	207156	198055	23218	52299	85586	5186	171353	23337	110163	156091	3580	189433	105548	113994	117494
w/o MS2:4-Hydroxy-5-(phenyl)-valeric acid-O-glucuronide_BMDB0096178_ms_ms_896984	MS	C17H22O9	371.11829:363334 372.12164:60733 373.125:46933		857386	769920	230432	457067	578420	513590	705715	771392	594287	246312	518227	474646	424494	1728815	250646	713273	526320	210968	150092	197471	291554	267882	216731	308494	240865	257898	350411	450652	467946	829180	832421	839441	229136	160904	151632	242119	354345	311458	620196	1215272	660862	809194	948406	472368	912099
w/o MS2:4-Hydroxy-5-(phenyl)-valeric acid-O-sulphate_BMDB0096179_ms_ms_896032	MS	C11H14O6S	275.04291:137403 276.04626:0 277.04962:0		2198	2223	119.586	119.586	119.586	119.586	119.586	119.586	1885	119.586	119.586	1605	119.586	46104	156318	119.586	119.586	24966	29647	119.586	119.586	119.586	1606	119.586	119.586	1699	81822	15412	119.586	119.586	119.586	119.586	119.586	119.586	119.586	119.586	119.586	119.586	1309	119.586	119.586	1438	119.586	119.586	119.586
w/o MS2:4-Hydroxycrotonic acid_BMDB0003381_ms_ms_310911	MS	C4H6O3	103.03215:452039 104.0355:1303551 105.03886:0		1012772	58945	31023	532082	46728	24034	252019	748231	409774	610562	370788	1476404	39763	705998	485223	528201	18645	1293524	953494	938818	700899	16856	398144	64491	1166883	743506	448038	540338	26635	41669	669377	48643	1388716	930001	741779	981692	1116936	549346	823893	58405	1003389	119945	13897	380247	30729
w/o MS2:4-Hydroxycyclohexylcarboxylic acid_BMDB0001988_ms_ms_10793	MS	C7H12O3	145.08601:1023156 146.08936:88760 147.09272:67456		3689070	2595152	3139785	2226336	3292259	1864189	3378223	3275516	9006695	8142949	6353466	5091718	7127810	2349004	506694	1408979	3206422	458282	439688	895868	412891	431828	1034929	8077732	6533544	2303274	6123236	8992983	7564472	314091	457041	468586	9545558	6795185	9920620	1037116	1825694	1444490	2135318	2721873	3153554	1647720	3619056	1861886	177038
w/o MS2:4-Hydroxydebrisoquine_BMDB0006468_ms_ms_364371	MS	C10H13N3O	190.10751:998413 191.11086:74097 192.11422:18482		4784904	4769900	4720986	2884550	4819348	4822144	4727278	4880752	385536	3674446	2390436	5495263	5646543	5468597	161930	4954168	423806	1918226	2145662	1853298	5835676	295365	2968891	177251	314494	3571920	3719915	2229124	3647115	4873063	4962224	4957876	352555	600739	621475	3723117	2148242	2014400	691783	4591931	4715616	1883864	3765710	1012545	6572186
w/o MS2:4-Hydroxyestrone_BMDB0005895_ms_ms_114222	MS	C18H22O3	285.16626:131749 286.16961:0 287.17297:0		9874	25564	2452	10476	11669	29223	7225	9678	797964	1012169	459414	548015	9890	402015	5131	4161	10329	18139	9942	12436	5730	14314	13854	7649	1016035	9911	6616	22520	406258	8356	6863	9543	18738	13566	9457	6463	8980	5470	12018	64487	8880	11293	12544	12791	11299
w/o MS2:4-Hydroxynonenal_BMDB0004362_ms_ms_131198	MS	C9H16O2	155.10611:374236 156.10946:114050 157.11282:185446		3051772	400576	2993459	2757706	3160001	1945167	498584	3151402	1048126	931111	937742	1361253	206979	1473044	814788	334114	349281	497182	454777	1234124	1091053	248106	1598249	584470	209359	679262	152207	458562	149304	5947106	110299	6025856	1541487	378298	361301	369091	153241	274190	2957669	1894178	559786	224682	504712	3030972	440507
w/o MS2:4-Hydroxyphenylacetyl-CoA_BMDB0003967_ms_ms_335504	MS	C29H42N7O18P3S	900.14282:210453 901.14617:0 902.14953:0		367419	390229	423647	634821	182460	235834	87009	416862	196001	485484	311480	448794	263403	421956	119624	167275	123042	370313	128838	318807	199037	99362	185134	396934	257055	20324	300617	164856	98436	290974	181425	284380	264783	71657	159568	375331	198100	88460	226617	127298	26786	351641	97740	11280	155741
w/o MS2:4-Hydroxyphenylacetylglutamic acid_BMDB0006061_ms_ms_1311559	MS	C13H15NO6	282.10205:44567 283.1054:0 284.10876:0		90069	41887	4166	79157	96258	108776	6516	4139	48024	86900	10477	3515	34618	110114	24341	6321	3298	2829	2955	53011	41669	38991	80701	3001	83603	6249	44269	242.26	94581	5596	86876	7780	150631	4074	239510	29726	3422	2671	28577	3690	41660	37942	7300	30205	2669
w/o MS2:4-Hydroxyretinoic acid glucuronide_BMDB0096231_ms_ms_965387	MS	C26H36O9	491.2326:798253 492.23595:214976 493.23931:0		2010272	2286022	4371906	5307910	4693686	2263557	3894166	2433352	1247589	1059962	1167902	1324528	3872768	3120543	453785	1781839	1643263	3481182	3611561	3487558	7035620	7061564	4801306	1380684	2957283	2736218	1554183	1227137	1083043	1254794	3417954	1098898	2229132	722419	2748586	2523153	2704090	1759184	6043696	6136336	3313774	2468001	979071	2836260	3875067
w/o MS2:4-Methoxyphenylacetic acid_BMDB0002072_ms_ms_298265	MS	C9H10O3	167.07368:393841 168.07703:95342 169.08039:107608		36709	50521	43162	24164	24818	36420	26463	64901	79969	1296186	866538	877424	77160	958905	346734	446956	54061	29219	25029	71796	123350	202367	50155	61085	19395	56361	15140	397577	23077	19427	1292599	19129	16956	16366	19424	13247	55661	30827	103028	147404	53123	18709	55681	68140	19803
w/o MS2:4-Methoxytyramine_BMDB0012162_ms_ms_309252	MS	C9H13NO2	168.10204:172868 169.10539:166873 170.10875:883744		49134	58538	83095	96661	82737	79154	15464	95112	78980	175286	61351	40392	56827	96447	28401	63038	87550	857482	95316	56699	1164531	46109	1022538	84541	63334	60224	70743	61077	88739	53548	75356	77879	45335	62853	57597	59340	86293	63960	23701	76487	67308	63755	54003	50359	40618
w/o MS2:4-Nitrophenyl sulfate_BMDB0006492_ms_ms_288603	MS	C6H5NO6S	219.96672:190961 220.97007:0 221.97343:0		6635	8138	24434	614357	3993	740942	2871	354561	2219	2458	2443	3077	19434	20026	4451	25101	345843	2632	72779	128105	17286	12774	4869	132411	4307	51180	132932	5192	2770	2691	2911	305415	3060	2584	2210	6495	492779	5945	90268	28690	3480	3700	20305	632119	278809
w/o MS2:4-Oxo-9-cis-retinoyl-beta-glucuronide_BMDB0096219_ms_ms_956011	MS	C26H34O9	489.21646:70760 490.21981:39490 491.22317:0		280.984	5218	34559	39005	280.984	280.984	57985	3886	37262	59081	52053	42058	79922	54179	33218	280.984	40908	123312	3886	82003	72317	43315	31027	280.984	4027	3800	280.984	3607	280.984	81771	88892	104225	280.984	280.984	280.984	59660	65459	24136	280.984	46779	86659	51646	86286	6688	30928
w/o MS2:4-oxo-Retinoic acid_BMDB0006285_ms_ms_158882	MS	C20H26O3	313.1806:389808 314.18395:76360 315.18731:36740		640560	776457	972670	1136923	968493	666976	700598	1061887	3109913	3110628	3022127	2481890	2492445	2586337	18276	298493	3720	570692	352530	436913	17735	55066	196095	2992916	1746173	3038842	3040179	1937586	1606162	200716	16554	255353	1201278	1327758	785519	686793	738691	746065	1200179	1327312	682371	1400471	1472423	1544704	23082
w/o MS2:4-Oxoretinal_BMDB0109600_ms_ms_296293	MS	C20H26O2	299.18332:375865 300.18667:58190 301.19003:21166		1859414	3485433	3580142	3915764	960883	3439867	2000443	1909321	3299703	1824756	2995520	641709	1629579	888257	1770830	1369291	1559408	2927737	511796	849639	3348955	1697534	1700387	3099664	858638	2994261	2818455	3027370	1492682	1943525	1810948	2161834	2204558	1548930	2033709	3081048	3019892	2936689	3440815	2017810	3519078	1764267	3277332	1857967	3413404
w/o MS2:4-phenylbutanic acid-O-sulphate_BMDB0096181_ms_ms_923109	MS	C10H12O5S	243.04416:82548 244.04751:10517 245.05087:19189		56873	48337	60022	24824	58278	39143	58779	40798	40349	14503	22648	19281	8375	13707	7530	21488	15778	17151	6801	29959	92616	54601	39049	15788	3130	9353	42901	23191	37815	32454	26282	38183	123301	109533	68336	16050	26060	36551	18246	19429	18510	3743	7066	28335	3372
w/o MS2:4-Phosphopantothenoylcysteine_BMDB0001117_ms_ms_23056	MS	C12H23N2O9PS	403.08752:956912 404.09087:163655 405.09423:0		4090778	2830031	3528875	5192361	5351715	1285412	1929352	3582294	3392988	4924819	5095880	5443020	3087196	2404512	3409024	2701213	3332279	2132161	4205724	2155829	1196431	5848726	4996595	1327079	2134	3896416	3565744	3000904	2794333	2735787	1371595	2604366	8287888	5787608	8328056	2399026	97088	1497074	3650782	5022004	3378456	666169	4158822	1896770	2313145
w/o MS2:4-Pyridoxic acid_BMDB0000017_ms_ms_305958	MS	C8H9NO4	184.0466:164531 185.04995:43591 186.05331:935321		447970	425898	474849	460619	444258	454561	445760	460012	5791	12083	10369	26507	351357	362269	25041	437852	16137	502804	471206	32753	35002	411166	7273	13880	8363	19460	432461	406082	23200	446611	8060	444929	156800	14675	18518	507638	527042	513051	368074	6205	34586	285740	314942	218711	767933
w/o MS2:4-Vinylphenol sulfate_BMDB0096246_ms_ms_965880	MS	C8H8O4S	199.01492:1528192 200.01827:861047 201.02163:0		1150575	195037	791349	870617	661044	681148	186167	1160696	843894	912876	1369453	31040	50011	363151	1907039	1303191	1790351	550674	570096	520622	947346	385114	680810	821468	528454	1166877	865368	1190974	627847	2165965	868375	690922	789946	636144	708348	961040	970640	1362602	9450944	896710	871827	1255225	659619	1047113	394282
w/o MS2:4,4-Dimethyl-14a-formyl-5a-cholesta-8,24-dien-3b-ol_BMDB0001421_ms_ms_290768	MS	C30H48O2	441.37143:60400 442.37478:17859 443.37814:19961		6279	46661	39058	11622	25426	5212	42438	51174	3726	8401	5489	212853	37997	16759	18436	3970	4336	59957	61966	4801	3442	10237	6873	4303	144629	3881	3907	9489	8385	3558	16295	3823	4518	3385	24802	201163	4052	4211	174567	7153	28638	3635	9166	7363	61419
w/o MS2:4,4-Dimethyl-5a-cholesta-8,24-dien-3-b-ol_BMDB0001286_ms_ms_178921	MS	C29H48O	413.37399:39789 414.37734:0 415.3807:0		3725	4845	234155	114440	263.562	4785	40125	4166	26968	134407	42558	3791	3152	29911	3689	24443	27032	55741	263.562	2930	24366	2868	3460	46421	3278	29503	3332	2941	29432	47717	2670	99660	2843	32502	3244	8657	19741	3045	149860	21514	3686	121687	2833	62054	133371
w/o MS2:4,6-Dideoxy-4-oxo-dTDP-D-glucose_BMDB0001399_ms_ms_34136	MS	C16H24N2O15P2	545.04126:96544 546.04461:13256 547.04797:0		162.187	162.187	162.187	3112	162.187	21567	162.187	162.187	2716	2945	162.187	143758	175478	200261	17307	3431	162.187	162.187	162.187	28744	162.187	162.187	162.187	162.187	162.187	162.187	162.187	162.187	162.187	100875	83412	90720	2276	162.187	162.187	2186	1622	162.187	162.187	162.187	17812	162.187	162.187	162.187	162.187
w/o MS2:4,6-Dihydroxyquinoline_BMDB0004077_ms_ms_317925	MS	C9H7NO2	162.05499:864793 163.05834:134108 164.0617:681889		2304938	2556122	2416385	2233836	2337496	2265903	2507792	2317146	1506098	842684	1414278	1921800	1974124	2166945	1665625	1492276	1837347	1581821	2467943	2362088	1877613	1315372	1782110	1770275	2188460	2161463	1312785	2297658	2046151	3858564	3712950	3899713	1901385	1688767	1693498	1689782	1845022	1949464	1501017	1422586	1530040	1396026	1458650	1271786	2348014
w/o MS2:4,6-Dimethylnonanoic acid_BMDB0002373_ms_ms_292530	MS	C11H22O2	187.18053:998133 188.18388:104758 189.18724:27765		13307480	7841158	10409655	14129707	12781204	14156143	13046829	13233710	13381816	13652019	11593702	12897980	5506877	12611446	13496639	12444712	12186417	12345963	6330275	12839344	7344542	10467431	12276465	10999473	12799794	13118399	7035982	13256982	11527835	12972828	6382506	12041549	11167856	13294327	11967568	12682780	10013516	12087297	6950788	7014526	3512107	11311401	12423694	13162379	11539704
w/o MS2:4,8 dimethylnonanoyl carnitine_BMDB0006202_ms_ms_304300	MS	C18H35NO4	330.26407:88205 331.26742:41968 332.27078:0		5101	4503	5714	10226	4738	4322	3887	4148	6288	8335	32179	12375	7417	7583	2857	4532	44612	6478	50907	7941	10275	5286	3040	5639	4257	24037	3809	8905	3948	26814	4272	7685	7512	10111	7048	11246	4141	34654	14147	7917	3998	3284	3032	4892	7114
w/o MS2:4a-Formyl-5a-cholesta-8,24-dien-3b-ol_BMDB0001203_ms_ms_336246	MS	C28H44O2	411.32779:320075 412.33114:38405 413.3345:0		662247	1546976	2367690	2628500	2867322	2797893	2859216	3071235	273878	813821	333317	267682	733092	586801	532838	474319	288750	278122	1049364	302232	87001	432532	373254	563435	827010	496628	2002324	820649	1368306	1129499	940080	526897	295397	1748084	1293180	492582	1837938	974006	72344	498743	187274	1232781	219080	1497997	852594
w/o MS2:4a-Methylzymosterol-4-carboxylic acid_BMDB0006927_ms_ms_316095	MS	C29H46O3	443.34042:427521 444.34377:62580 445.34713:0		96067	40998	4326	1524022	89703	15190	140969	950900	7909	3808	3699	106844	167998	14649	28819	4145	2970	4083	20132	122863	224165	172559	135047	46991	22852	24642	50435	30686	173207	7590	3661	3596	40816	6820	2986	41150	93612	321340	198052	250584	42479	23253	3639	4222	188261
w/o MS2:4alpha-carboxy-5alpha-cholesta-8-en-3beta-ol_BMDB0012166_ms_ms_307030	MS	C28H46O3	431.35196:59249 432.35531:24728 433.35867:68641		84320	33497	6656	7556	30860	19014	6690	26683	41545	50642	141647	121609	14876	25573	5448	16771	9744	12194	4899	25744	122721	75570	17595	15184	18931	151321	6412	4973	16374	6119	14087	25844	14804	20269	28340	11480	11593	5711	9662	25662	32430	9021	10156	14922	121792
w/o MS2:4alpha-formyl-4beta-methyl-5alpha-cholesta-8-en-3beta-ol_BMDB0012168_ms_ms_346352	MS	C29H48O2	427.35776:243754 428.36111:58586 429.36447:0		755200	490807	419618	604337	463243	412425	698653	420114	82816	487906	130586	1497197	1285811	2083407	73229	48244	58902	347591	623373	224042	876352	1590286	1751010	1113445	1625914	1366339	21237	75699	45226	82751	24270	27878	3419	3621	10911	574461	1240298	1228073	1018409	2017551	1157319	11550	20365	5237	997359
w/o MS2:4alpha-hydroxymethyl-4beta-methyl-5alpha-cholesta-8-en-3beta-ol_BMDB0012171_ms_ms_291695	MS	C29H50O2	431.38815:50256 432.3915:142010 433.39486:105095		293.415	293.415	18050	293.415	293.415	293.415	293.415	293.415	293.415	4042	293.415	3467	4642	293.415	293.415	19451	3334	293.415	293.415	293.415	293.415	293.415	2934	293.415	293.415	293.415	29314	3375	293.415	293.415	293.415	293.415	293.415	3143	293.415	23721	3840	293.415	293.415	293.415	293.415	293.415	293.415	293.415	3050
w/o MS2:4b-Hydroxystanozolol_BMDB0003318_ms_ms_321874	MS	C21H32N2O2	345.25784:200035 346.26119:26443 347.26455:17185		16556	17822	49115	19170	18965	25611	23934	39078	310992	201462	233354	188790	324783	300405	16317	8817	25041	12470	3147	74004	25314	13701	29949	203440	104833	278906	97761	324787	605871	32100	15475	5456	20197	558531	130416	64012	7632	21832	5489	17629	19286	19257	6326	24046	10215
w/o MS2:5-(2'-Carboxyethyl)-4,6-Dihydroxypicolinate_BMDB0006794_ms_ms_312379	MS	C9H9NO6	228.06302:137512 229.06637:33871 230.06973:0		2388011	2518713	2507188	2488690	2522244	2411612	2497084	2479493	504754	304196	1573717	6139970	6258466	216437	6524981	6342637	6446629	4661462	4701240	4605338	286079	416660	2409178	647707	647282	411587	83469	1418223	1459021	1772187	1744775	47554	1051722	689201	986423	2364000	2392336	2230912	2045027	2062332	2097074	5366004	5492597	5387222	1224684
w/o MS2:5-(3'-Hydroxyphenyl)-gamma-valerolactone-3'-O-glucuronide_BMDB0096189_ms_ms_939547	MS	C20H26O6	361.17734:84273 362.18069:27938 363.18405:0		632256	201502	715502	319665	376814	324201	211431	263138	47571	87165	102395	155940	180750	8108	139500	233649	196701	48867	174886	5631	3920	3586	4028	325855	176976	317553	5170	407353	199692	246736	392093	4747	416034	138797	230752	299563	146238	112427	159867	15247	395634	11565	4813	294198	5045
w/o MS2:5-(3',4'-dihydroxyphenyl)-gamma-valerolactone-3'-O-glucuronide_BMDB0096112_ms_ms_320420	MS	C18H22O10	399.12689:456111 400.13024:81518 401.1336:19662		1195879	1207109	1096633	1163987	1152271	1161347	4499320	1207216	987545	1596210	999578	2543352	5664683	1478478	1099211	1217154	1049514	1407088	3212846	1400814	2901661	2234896	5553514	22599	2761179	1374490	1085541	3090659	1100072	2360584	3379242	3197752	1917611	1888656	1868862	1118844	1134058	2208832	1064895	1101684	1123021	4024591	1072070	1080873	1057992
w/o MS2:5-(3',4'-Dihydroxyphenyl)-gamma-valerolactone-4'-O-glucuronide_BMDB0096187_ms_ms_888471	MS	C17H20O10	385.09201:185993 386.09536:0 387.09872:0		279.712	279.712	279.712	279.712	279.712	60863	41041	4187	279.712	3524	279.712	279.712	23889	279.712	21441	2859	37285	279.712	279.712	279.712	279.712	279.712	279.712	279.712	3023	3675	43257	55686	279.712	279.712	31905	42090	3494	279.712	53297	2797	24736	279.712	279.712	279.712	31676	279.712	279.712	279.712	61086
w/o MS2:5-(3',4',5'-trihydroxyphenyl)-gamma-valerolactone-O-methyl-5'-O-glucuronide_BMDB0096212_ms_ms_918410	MS	C18H22O11	415.13635:40702 416.1397:0 417.14306:0		2559	162.896	162.896	87036	3125	162.896	162.896	162.896	1893	51070	47582	128399	162.896	100631	162.896	15415	162.896	137157	2614	63880	162.896	1854	2420	107476	92054	162.896	57596	79392	162.896	162.896	162.896	76666	162.896	2364	162.896	1753	162.896	33250	162.896	162.896	162.896	64803	162.896	110322	162.896
w/o MS2:5-(3',4',5'-Trihydroxyphenyl)-gamma-valerolactone-O-methyl-O-sulphate_BMDB0096213_ms_ms_954158	MS	C12H14O9S	333.01645:173076 334.0198:0 335.02316:282095		7328	210.525	20934	210.525	11003	210.525	210.525	210.525	210.525	210.525	210.525	1061438	2582	6039	210.525	210.525	210.525	32384	254706	3585	2306	6611	4623	5344	3205	6868	4579	4341	210.525	210.525	210.525	2303	210.525	210.525	210.525	5956	210.525	6910	2280	210.525	210.525	210.525	210.525	210.525	210.525
w/o MS2:5-(3',5'-Dihydroxyphenyl)-gamma-valerolactone-O-sulphate-O-methyl_BMDB0096215_ms_ms_910464	MS	C12H14O7S	303.05258:45199 304.05593:0 305.05929:0		212355	147742	131855	287782	102585	86074	88891	124261	2988	225.521	225.521	471767	158924	378350	225.521	225.521	225.521	157346	252159	187938	459894	264214	489862	313280	675909	567342	225.521	225.521	225.521	3102	225.521	225.521	225.521	2832	2853	932216	502192	499615	721793	369085	425551	225.521	225.521	225.521	344091
w/o MS2:5-(4'-Hydroxyphenyl)-gamma-valerolactone-4'-O-glucuronide_BMDB0096190_ms_ms_909042	MS	C20H28O6	365.17154:64220 366.17489:1293118 367.17825:3995464		43253	1979	124.026	124.026	15759	89885	124.026	124.026	124.026	2438	124.026	118564	112517	82744	1416	124.026	62293	124.026	124.026	58550	124.026	1769	124.026	82976	124.026	1888	1640	124.026	124.026	124.026	100369	107980	124.026	124.026	124.026	68305	124.026	1240	32402	117217	99595	124.026	124.026	87433	124.026
w/o MS2:5-(Hydroxyphenyl)-gamma-valerolactone-O-sulphate_BMDB0096191_ms_ms_914780	MS	C11H12O6S	273.03299:37417 274.03634:0 275.0397:0		269.152	269.152	269.152	269.152	269.152	269.152	269.152	269.152	269.152	2986	269.152	269.152	269.152	269.152	269.152	5376	3369	269.152	269.152	269.152	3762	269.152	269.152	269.152	269.152	3206	3465	269.152	269.152	269.152	3128	3218	3658	269.152	269.152	269.152	3410	4569	269.152	4077	269.152	269.152	269.152	269.152	269.152
w/o MS2:5-Acetylamino-6-formylamino-3-methyluracil_BMDB0011105_ms_ms_154726	MS	C8H10N4O4	225.05992:495680 226.06327:22286 227.06663:12757		60345	51783	783667	922160	71361	508791	392704	1288708	4881471	5254662	620659	2306980	39179	5076472	37817	29143	43097	39857	47676	59749	51036	56948	72476	313641	22432	4772385	57571	91791	188573	37617	588165	42015	177468	4172539	51149	68747	40761	43242	73952	5389494	32945	64847	25776	696359	22809
w/o MS2:5-Amino-6-(5'-phosphoribitylamino)uracil_BMDB0003841_ms_ms_181421	MS	C9H17N4O9P	355.06958:188867 356.07293:35082 357.07629:0		23256	33341	14162	601265	748835	12416	478524	250250	249657	564391	705329	141631	472517	304144	22697	47637	22868	517941	73180	30510	28268	28915	16303	376039	314929	34864	32547	387240	1006455	25931	385380	51210	32436	35131	255397	10446	12906	53967	5917	118393	21132	18021	70513	290661	35711
w/o MS2:5-Amino-6-ribitylamino uracil_BMDB0011106_ms_ms_30947	MS	C9H16N4O6	275.09515:189951 276.0985:0 277.10186:0		210216	361083	177301	335419	150469	288025	99992	174779	82152	65683	2471	4436	5888	2580	3211	94486	3592	3252	3322	92756	4049	205870	3171	2836	3119	7300	81016	2913	3194	2547	125928	6089	103295	3530	52727	84583	3490	6551	3334	2899	133972	4171	281552	3234	7526
w/o MS2:5-Aminoimidazole ribonucleotide_BMDB0001235_ms_ms_23300	MS	C8H14N3O7P	296.06604:22319622 297.06939:1860125 298.07275:1762736		77297968	76520952	80313560	79622232	85468544	86311352	82644688	83123248	31796882	31526230	32798230	205103056	205332800	182709968	38899544	37026108	37543840	157745888	156535472	154125392	96865384	98146448	98259424	83946200	82836712	82778472	78005736	76875888	78384200	115309472	118616880	113155672	18720898	18714202	19341850	80971992	82668616	81561960	64304508	66522400	65067080	58475620	58681476	61116044	192045456
w/o MS2:5-Aminoimidazole-4-carboxamide_BMDB0003192_ms_ms_23194	MS	C4H6N4O	127.07561:114211 128.07896:36855 129.08232:294319		222533	170381	199888	376054	348075	412180	556298	345981	248113	222956	122058	300741	382914	340974	288019	110515	138691	78654	44928	84131	140132	68276	42132	155598	118432	77617	189180	203743	70984	67902	69596	219895	160505	255453	135928	115137	47620	68713	41283	103140	103301	123975	51272	82945	38129
w/o MS2:5-Dehydroepisterol_BMDB0006848_ms_ms_181350	MS	C28H44O	395.33273:423708 396.33608:83367 397.33944:22340		54258	1378336	79668	80624	47555	43361	83890	2045203	1525647	38119	65321	1529998	1658262	1430810	18681	13087	41643	27080	13604	866992	3477	20344	23921	1346135	275602	27218	46910	46001	1033793	1150610	11877	464814	65051	50332	1437119	40669	1499511	44217	402495	14913	47923	43486	22003	53014	560268
w/o MS2:5-Diphosphoinositol pentakisphosphate_BMDB0006229_ms_ms_182307	MS	C6H19O27P7	738.81067:129290 739.81402:0 740.81738:0		3982	5576	213.694	2507	2927	213.694	213.694	213.694	213.694	213.694	213.694	5791	2656	2892	3269	2562	3024	21509	119411	4020	25331	38558	3647	65271	2266	2329	213.694	213.694	2622	213.694	213.694	2823	2243	7890	213.694	213.694	213.694	2263	213.694	2369	213.694	213.694	2412	213.694	213.694
w/o MS2:5-Dodecenoic acid_BMDB0000529_ms_ms_1375677	MS	C12H22O2	197.15373:611315 198.15708:97710 199.16044:1701126		8617410	8270296	5020055	3756834	9033940	5205063	5009584	8669905	4932448	4414043	5267894	4028694	8280798	4979097	4716398	4323206	4469918	4065328	3806815	8391698	4502302	4215529	3832682	3727592	7675586	4100122	855928	4055341	4178404	2948514	4111963	8219076	4364936	4279769	1058768	4080081	4914102	3763810	3827162	3110332	5494275	3936519	998260	1257744	5688224
w/o MS2:5-Formiminotetrahydrofolic acid_BMDB0001534_ms_ms_357630	MS	C20H24N8O6	471.16684:97982 472.17019:99140 473.17355:337490		210844	241477	271578	197016	260850	222575	232278	254838	348.565	99409	348.565	348.565	117006	281428	259333	167268	161221	348.565	348.565	5640	5251	75563	142972	77104	348.565	348.565	7329	131057	93835	101519	348.565	348.565	188951	21365	5655	6657	100865	348.565	91145	348.565	141565	107512	202269	142466	348.565
w/o MS2:5-Hydroxy-N-formylkynurenine_BMDB0004086_ms_ms_305552	MS	C11H12N2O5	253.08194:346085 254.08529:41737 255.08865:44804		15840	96990	141021	55821	95580	71725	35039	26759	4070	5166	77244	78474	407852	14468	6835	98895	6856	8164	70925	407.029	236566	469304	344973	143063	407.029	136864	94502	407.029	244064	83448	105679	103445	407.029	121260	54308	8670	18141	88529	46358	70917	86546	64666	8596	26045	425028
w/o MS2:5-Hydroxyindoleacetic acid_BMDB0000763_ms_ms_20578	MS	C10H9NO3	192.06142:922061 193.06477:90566 194.06813:114953		2787361	1830085	2806442	2705758	2788037	2933828	3124110	1843854	1270461	1239546	1114765	5700766	6064375	3005138	1505697	1948598	1940250	4192225	2107196	2260280	1302090	2840555	2905190	1982234	2105583	1210624	1416498	1322080	1363316	3269074	3166616	1651086	615122	492462	417918	1241203	987142	1723582	2557470	2736516	2809338	1599744	1552415	797687	1921720
w/o MS2:5-Hydroxyindoleacetylglycine_BMDB0004185_ms_ms_286844	MS	C12H12N2O4	249.08482:218056 250.08817:196061 251.09153:0		2366	146260	2275	84599	2932	278460	114538	2291	407301	240846	361059	67663	1453	1580	82678	244038	2695	71665	35391	1835	198289	35353	303843	284588	50733	134000	533372	530861	443492	343359	2047	360081	2065	114557	1755	386742	408357	404850	461741	377596	601842	603362	461512	478744	43335
w/o MS2:5-Hydroxypyrazinamide_BMDB0001978_ms_ms_320637	MS	C5H5N3O2	140.05316:586915 141.05651:115777 142.05987:0		181786	447478	130872	427678	327340	220592	262723	242549	103521	103891	176885	1542867	67918	388108	47744	1220560	85989	85521	2324606	3699453	1212635	96914	84396	633651	137280	127381	51647	128026	43465	1637426	1308867	207107	53099	48618	25537	92679	137511	168657	533773	232770	257538	59671	77849	56712	58139
w/o MS2:5-Hydroxytryptophol glucuronide_BMDB0096034_ms_ms_299178	MS	C16H21NO7	340.13531:386637 341.13866:0 342.14202:0		5096	175.221	175.221	175.221	175.221	5157	175.221	175.221	41809	175.221	3734	175.221	13949	2428	175.221	175.221	175.221	175.221	2074	175.221	175.221	2009	2402	34990	175.221	175.221	6527	5981	31075	10850	175.221	175.221	175.221	175.221	175.221	2604	175.221	175.221	175.221	2373	18410	175.221	175.221	175.221	175.221
w/o MS2:5-Hydroxytryptophol_BMDB0001855_ms_ms_21303	MS	C10H11NO2	178.08624:1040462 179.08959:406582 180.09295:43744		1343604	1298602	1296484	1371597	1317620	1267177	1359187	1284903	845853	954623	355818	1464611	1390906	1331856	784701	777453	765561	600200	1175398	1166077	1420972	1488910	1370917	758588	810300	769798	940416	1261724	905506	1132112	1031546	1065620	2306870	2200516	2263576	831282	855051	1244411	1264871	1231351	1333065	1056193	1226556	329737	2368776
w/o MS2:5-L-Glutamyl-taurine_BMDB0004195_ms_ms_29563	MS	C7H14N2O6S	255.06236:786878 256.06571:69294 257.06907:112382		4229284	2241126	2034014	1730672	1846910	4224192	1824354	1683973	3531767	3702387	858680	9186456	4741240	5959966	3577400	1414581	2416794	1515833	2284758	873097	1358134	3814665	3668206	4703758	4641603	4762910	1591213	1080876	1719744	1697327	729095	963276	1511566	4010449	2683560	4637144	5173168	4593371	5623550	5391012	832132	1236276	457261	4108874	1300924
w/o MS2:5-Methoxydimethyltryptamine_BMDB0002004_ms_ms_308845	MS	C13H18N2O	219.15919:2439210 220.16254:371701 221.1659:153016		6390237	3664859	2968970	5182072	6804936	2159004	4602302	3110950	2432362	9034125	8937644	2712415	6430435	3376211	546023	331096	514372	528659	1557906	877467	1053899	793624	417588	1273981	9000235	4059570	2766844	3900651	5251120	785163	598597	952053	2525340	2068337	3219837	1077856	593145	865346	715547	2975061	891438	957162	496030	870939	1337132
w/o MS2:5-Methoxytryptamine_BMDB0004095_ms_ms_310731	MS	C11H14N2O	191.12788:785727 192.13123:107956 193.13459:215941		1546493	353961	745453	997709	1043470	1075236	1429967	814112	1342897	4030942	1816952	1719897	2874504	1406364	245821	614460	213130	1328515	289779	180204	71990	340727	522642	1483256	3164240	3015614	1283904	2092292	3236488	804989	286260	139898	1157316	1103454	995763	1059967	144097	116565	185759	267276	132157	618236	1814327	1557920	130677
w/o MS2:5-Methoxytryptophan_BMDB0002339_ms_ms_335966	MS	C12H14N2O3	233.09201:987999 234.09536:130852 235.09872:15601		4528370	4541320	4487430	4443992	4472241	4568332	4537670	4521306	2192093	4609272	4690227	5219340	5411606	5310650	3531332	1829595	3524704	4178835	2124568	4095797	4614096	4525240	4626040	3365655	2125098	3596447	3698685	1513612	1528921	3769532	3822413	3886062	6193634	6158954	6075586	502249	5627960	5667742	1643795	1800789	3024678	2746007	1364577	1535456	3082005
w/o MS2:5-Methoxytryptophol_BMDB0001896_ms_ms_300143	MS	C11H13NO2	192.10202:452474 193.10537:202385 194.10873:1790756		12918	386970	780980	265932	4036	24828	11705	6286	503958	213459	238964	863560	11103	218325	17259	3991	4154	20369	4970	213886	227257	22985	7186	348649	296059	189725	576922	532484	325904	849168	8310	9974	3236	242323	101397	201119	5907	108780	733433	110565	91206	4894	145229	5455	109591
w/o MS2:5-Methylcytidine_BMDB0000982_ms_ms_345366	MS	C10H15N3O5	256.0813:467599 257.08465:0 258.08801:786486		362866	686109	688277	268194	651072	286421	253586	497151	267301	377212	376551	739312	825524	327774	752095	820733	454831	1241532	1220362	325120	172174	443829	328536	249690	297768	236790	262578	953742	965905	1084822	1121620	1002873	389279	207702	25625	420589	196462	322434	120563	218598	611125	442275	577006	496550	968002
w/o MS2:5-Methyldeoxycytidine_BMDB0002224_ms_ms_367408	MS	C10H15N3O4	240.10187:1092219 241.10522:171841 242.10858:12775273		4607585	4402980	4569390	4517080	4720294	4600328	4541826	4545332	3559950	3355584	3425208	4046369	3982639	4208520	5216894	5206352	5430500	9929005	10294073	10123905	4475350	4540313	4303472	2569094	2443833	2460874	6883074	6705655	6783430	5650779	5656938	5561054	4447452	4710642	4573616	3419128	3471574	3450774	2555067	2439685	2543604	3137505	3035038	3068581	6503080
w/o MS2:5-Methyldihydrofolic acid_BMDB0006486_ms_ms_370001	MS	C20H23N7O6	456.16843:111102 457.17178:0 458.17514:0		278394	648939	670673	479152	477329	321267	668529	479317	37927	41733	99957	304725	148179	412007	74482	24991	65334	78048	237464	360329	485625	274370	190492	426430	211627	291313	71532	129783	80445	70466	57604	85723	139516	63919	114645	546563	265992	221802	145998	182088	206893	141825	98098	159067	627105
w/o MS2:5-Methyltetrahydrofolic acid_BMDB0001396_ms_ms_162879	MS	C20H25N7O6	458.18726:288005 459.19061:0 460.19397:0		184.517	184.517	184.517	63871	8306	184.517	184.517	184.517	184.517	184.517	10396	106877	104644	2281	451156	184.517	184.517	2544	92396	65612	80717	184.517	83280	690387	120866	110833	184.517	383592	184.517	3218	7750	184.517	184.517	184.517	861883	170754	203243	574444	259942	185910	845320	184.517	487519	184.517	118066
w/o MS2:5-Methyltetrahydropteroyltri-L-glutamate_BMDB0012177_ms_ms_39587	MS	C30H39N9O12	716.24255:90610 717.2459:0 718.24926:0		31125	73761	114059	69662	28036	56375	40350	96573	26424	112011	17824	64173	17432	124684	11435	18053	19448	75689	20492	20371	94316	73063	56467	68068	120245	53374	46175	20587	29729	20893	72967	16948	56375	68727	94770	55537	33995	18165	52124	71513	115918	80219	38546	66352	54219
w/o MS2:5-Methylthioribulose 1-phosphate_BMDB0001299_ms_ms_182050	MS	C6H13O7PS	258.9873:94108 259.99065:0 260.99401:0		389645	103735	225015	4775	238911	329922	46513	175154	281127	129447	224838	16183	8370	13845	6968	216840	3833	14302	4285	8638	3749	21878	8823	238650	212386	10424	7373	166101	4358	258475	8303	10224	6968	108114	14460	7997	116340	150705	7868	2514	42546	172648	8292	5880	2491
w/o MS2:5-Phenylvaleric acid_BMDB0002043_ms_ms_263926	MS	C11H14O2	179.10616:267217 180.10951:81450 181.11287:187796		516237	544484	649233	394594	586864	244125	681390	1634250	1158830	241274	225216	358710	163075	212565	217309	913830	169075	1169293	263114	419795	176499	171274	164079	260440	678716	532613	471547	741578	455626	334893	340692	555058	1128847	295331	152847	214241	230574	549410	211674	460128	692562	499788	1679505	544589	186426
w/o MS2:5-Phosphoribosylamine_BMDB0001128_ms_ms_178614	MS	C5H12NO7P	230.04747:32950 231.05082:0 232.05418:0		29162	240.708	240.708	240.708	240.708	240.708	4581	4579	240.708	240.708	83662	240.708	240.708	240.708	240.708	240.708	240.708	240.708	240.708	240.708	240.708	240.708	6177	240.708	240.708	240.708	41204	3138	89503	43367	240.708	3045	240.708	52986	41533	240.708	240.708	240.708	240.708	240.708	240.708	240.708	38238	240.708	3016
w/o MS2:5-Taurinomethyl-2-thiouridine_BMDB0011610_ms_ms_310250	MS	C12H19N3O8S2	398.08444:468155 399.08779:0 400.09115:0		60379	78626	41599	138705	135683	192.596	136880	2678	22327	192.596	26609	236331	19969	154836	43967	6839	4073	75934	2899	17538	192.596	31537	42207	6667	1926	73142	75174	107937	132904	41746	50470	5071	192.596	89935	3878	192.596	158574	192.596	70048	101709	36944	16893	154315	106234	88547
w/o MS2:5-Thymidylic acid_BMDB0001227_ms_ms_178533	MS	C10H15N2O8P	323.08084:47954 324.08419:0 325.08755:0		162.432	51551	162.432	60676	56228	65934	35503	162.432	2077	162.432	162.432	33965	162.432	54767	162.432	97523	54462	69536	73958	58651	162.432	162.432	59610	92513	86081	72498	87755	79664	162.432	1965	45128	2473	162.432	162.432	162.432	73620	2352	2642	19373	162.432	35502	162.432	5692	2470	162.432
w/o MS2:5,10-Methenyltetrahydrofolic acid_BMDB0001354_ms_ms_30968	MS	C20H21N7O6	454.13184:90076 455.13519:0 456.13855:0		102038	196780	96264	97298	122580	104680	46145	160292	17708	64949	26746	18121	19246	36870	97203	132496	59681	13433	17126	12900	28153	34498	35874	22226	7044	8155	24673	33362	151957	26895	21466	13809	330994	210498	93218	14955	17437	5930	13495	8702	6384	10753	6791	34538	48331
w/o MS2:5,6-Dihydro-5,6-dihydroxy-y,y-carotene_BMDB0003071_ms_ms_346103	MS	C40H60O2	571.47656:111502 572.47991:188303 573.48327:72770		26296	4662	277948	323578	33059	48095	88419	73669	90444	87152	72677	25381	15308	18727	16188	9864	6393	23508	18197	19238	31106	35149	22127	6936	44033	43588	36817	22403	22102	7441	15462	14681	18381	3550	25314	18258	18367	34281	83723	211666	126826	137417	309248	281340	185900
w/o MS2:5,6-Dihydroxyprostaglandin F1a_BMDB0012109_ms_ms_292634	MS	C20H36O7	389.25098:1105471 390.25433:218619 391.25769:86052		4248859	3731109	4182924	2591088	4643776	3488432	3445538	7748834	30434	16635	45437	2484140	12235136	2274540	585605	770973	59453	1672872	2879058	5952618	14462899	8972537	7525868	3280366	8068698	3529063	54571	434923	289705	247392	99514	393037	123256	39287	107169	16793250	8163726	2363696	10425104	10908431	8725126	189316	425220	451870	9049353
w/o MS2:5,8-Tetradecadienoic acid_BMDB0000560_ms_ms_1371544	MS	C14H24O2	223.15364:218570 224.15699:0 225.16035:145606		324865	371203	708904	99168	520827	933924	460923	509084	796560	281699	310514	204391	210474	341658	332263	219074	76226	1067744	158498	241150	112445	179440	181916	1274686	166426	157000	218349	250693	162208	100121	214483	126549	200975	644898	215746	179644	1407304	53337	953397	90376	79402	81543	157673	103878	119539
w/o MS2:5'-(3'-Methoxy-4'-hydroxyphenyl)-gamma-valerolactone_BMDB0096121_ms_ms_310115	MS	C12H14O4	223.09647:972175 224.09982:131407 225.10318:92454		8030394	7919700	7575328	7188646	8020330	7563922	7330918	7346120	2843383	2849490	3426473	10826440	6102494	10642543	3008645	4167560	1830485	3961414	5094027	8084861	8007368	9394195	5048250	5365141	10029263	5017944	2109712	3213505	2795446	1017007	2208396	2816846	4587410	5573690	5565666	10841756	10978824	10790196	5572622	4915825	5347464	2904774	2978180	5621362	9273832
w/o MS2:5'-Carboxy-alpha-chromanol_BMDB0095950_ms_ms_320063	MS	C19H28O4	321.1926:259420 322.19595:333872 323.19931:74616		33082	42409	24156	165437	159625	186124	110687	215859	11307	14847	10966	425976	422684	83728	9473	3464	8564	165645	93052	285115	290430	73779	85735	201756	647261	507536	4929	3952	8621	7734	3408	4717	4327	12585	3291	410643	281641	362631	343761	73034	312946	14560	3588	8184	197245
w/o MS2:5'-Carboxy-gamma-chromanol_BMDB0095951_ms_ms_1259435	MS	C18H26O4	307.18753:285572 308.19088:37346 309.19424:46963		14257	13980	15639	1158770	9711	23438	16169	17456	2051511	9344	14177	52945	506893	1171806	22393	1119954	608631	30717	250341	36255	885167	1039455	86337	22168	1011139	525408	9826	23768	11849	22763	8792	16752	184523	2033540	13622	25404	348861	461300	202478	19295	328042	15977	11115	13220	51231
w/o MS2:5'-Deoxyadenosine_BMDB0001983_ms_ms_27502	MS	C10H13N5O3	252.12314:509077 253.12649:189793 254.12985:15337		6461785	6669694	7298456	6896418	3636161	6771042	4014092	6800239	3465855	3859990	3843576	3460424	5253130	1107229	3160278	1304129	3531917	4427100	2198076	4804636	5911897	5867538	4488091	4493336	6242429	843413	3488966	3243001	3228614	3239778	3076494	2916689	6399754	6101378	3736072	3109494	3385655	3910036	3112496	3391905	3299394	967645	2877826	6356139	6502188
w/o MS2:5'-Methylthioadenosine_BMDB0001173_ms_ms_178997	MS	C11H15N5O3S	298.09729:110437 299.10064:59218 300.104:0		255.009	111528	186611	330274	75504	167146	242253	4822	450922	149482	444302	255.009	233020	295733	6477	255.009	2667	102871	4240	4346	3357	51338	255.009	41816	120515	564360	3501	2999	180483	255.009	2787	78244	128272	124284	202990	123987	94385	255.009	60723	7950	65328	47824	155748	99055	255.009
w/o MS2:5'-phosphoribosyl-a-N-formylglycineamidine_BMDB0002305_ms_ms_27653	MS	C8H16N3O8P	314.08395:913451 315.0873:91269 316.09066:0		2695242	2656588	2752206	2906340	2849677	2869683	2876460	2934078	75301	1193661	1363253	5017070	4968948	4890510	1441197	1403593	1354009	5424443	5423526	5456418	3641650	3453233	3806082	3325029	3129033	3131048	3085002	3061744	2996102	3125499	3291552	157241	2019347	1169828	2103134	3752304	3949244	3879386	2999591	2921032	2926199	1957365	1961039	1934818	4344556
w/o MS2:5'-Phosphoribosyl-N-formylglycinamide_BMDB0001308_ms_ms_28784	MS	C8H15N2O9P	315.04114:127898 316.04449:0 317.04785:0		151925	148633	106799	83217	106127	98105	127003	112271	128734	22518	172838	69192	62856	40745	54425	169311	138118	91993	128655	216756	70105	163468	166518	65948	89950	61835	155897	158943	261202	90424	164717	155816	210589	130141	82715	44564	73454	61838	240737	270155	181167	214838	195620	169709	333769
w/o MS2:5a-Androst-3-en-17-one_BMDB0006046_ms_ms_288646	MS	C19H28O	273.2207:365384 274.22405:97740 275.22741:609858		114786	94158	59628	32315	72849	101027	135977	218324	72782	142160	120303	627583	187340	77969	286270	206038	257990	603355	198375	123791	200760	181912	260693	145609	234922	1225303	122474	88929	92188	373856	253347	256463	39552	447954	296738	127966	235916	43992	184713	89150	439596	454635	28991	72952	598134
w/o MS2:5a-Androstan-3b-ol_BMDB0005830_ms_ms_119178	MS	C19H32O	275.25818:737783 276.26153:235156 277.26489:0		103675	247540	203757	251026	373288	212797	225674	171987	87876	67510	139866	146836	160506	1039466	186861	69372	174054	163260	153728	233233	245393	206081	72475	154219	231260	165332	225310	314400	235230	193125	129734	140975	904450	918826	876576	160392	1755382	95172	150999	157632	217282	150662	191767	153515	194749
w/o MS2:5a-Cholesta-8,24-dien-3-one_BMDB0001093_ms_ms_339745	MS	C27H42O	381.33963:65158 382.34298:0 383.34634:44726		3477	8076	61781	4552	4510	35576	4008	18805	10740	2886	23331	16385	3022	8758	19017	45004	15124	13614	5588	4365	19743	16763	3532	3506	3280	5886	2890	4404	20939	3100	26587	4051	28078	3876	3483	36685	16348	67565	3852	39620	21282	2569	124997	30097	2939
w/o MS2:5alpha-Androstan-3alpha,17beta-diol disulfate_BMDB0096249_ms_ms_454638	MS	C19H32O8S2	453.1673:4069447 454.17065:961698 455.17401:265155		38185192	256929	780984	1257276	674759	44199480	46307300	1029539	80948	166937	70345	665320	371356	295268	11658790	13194402	13946251	312987	1570144	263464	712033	1195688	50018492	4297792	684672	60640976	15160021	15268843	43370	15166238	16596862	18108018	44497	171416	20919994	203055	55918528	55346436	479427	61159552	33351794	92401	19697854	19092884	37752924
w/o MS2:5Alpha-cholesta-8-en-3-one_BMDB0012178_ms_ms_361776	MS	C27H44O	383.35117:96934 384.35452:24627 385.35788:73542		18105	2683	4872	3786	7954	3365	3031	3362	51727	1968	2232	1395	2061	1407	131940	1614	117885	5304	231563	1548	1879	3773	1905	8154	4038	241849	1341	4285	21336	4606	1549	6042	199218	7202	67882	3882	3568	9748	4125	4770	10321	11372	23327	3830	3810
w/o MS2:5b-Cholestane-3a,7a,12a,23R,25-pentol_BMDB0000513_ms_ms_298855	MS	C27H48O5	453.34335:34355820 454.3467:8976658 455.35006:1350928		278518400	137844272	288450656	2322335	293784096	2855562	2893197	4720268	2252363	2061500	2532970	2501	24110	8424	3124389	2061469	2856783	34714	9053	2197	11402	8003	18394	41736	21374	8578	521505536	3665632	1102898	511464576	3559056	262564656	537567680	4032914	1376212	3879	105482	4630	51391	2524	8544	2309919	2391042	3877602	52024
w/o MS2:5b-Cholestane-3a,7a,12a,25-tetrol_BMDB0000524_ms_ms_1249101	MS	C27H48O4	437.37372:254552 438.37707:99189 439.38043:112965		1232819	598257	76696	862285	475071	602174	293232	658671	25072	90071	227157	692989	596989	543953	27056	10785	23032	296715	832867	53612	954680	1506621	1737625	1273892	904952	1270891	51854	13933	38839	40246	537838	46280	28037	53405	62352	53035	180690	27606	854212	1757908	1085293	46563	139371	66993	79912
w/o MS2:5b-Cyprinol sulfate_BMDB0006888_ms_ms_315383	MS	C27H48O8S	533.30768:73311 534.31103:0 535.31439:0		13031	44051	68018	56224	5577	52394	11831	6573	3611	2706	9836	26905	72337	67377	5701	18044	27083	12066	6083	20837	8461	4663	7074	3564	22250	2956	32760	33527	35566	8755	35819	3956	9208	84280	79204	36688	16546	13965	5491	23494	43808	8536	14194	27948	2740
[truncated: 1,432 more rows]
[truncated: 98 more columns]

## Sheet: dataset classified
Metabolite name	Class	Sample1_rep1	Sample1_rep2	Sample1_rep3	Sample2_rep1	Sample2_rep2	Sample2_rep3	Sample3_rep1	Sample3_rep2	Sample3_rep3	Sample4_rep1	Sample4_rep2	Sample4_rep3	Sample5_rep1	Sample5_rep2	Sample5_rep3	Sample6_rep1	Sample6_rep2	Sample6_rep3	Sample7_rep1	Sample7_rep2	Sample7_rep3	Sample8_rep1	Sample8_rep2	Sample8_rep3	Sample9_rep1	Sample9_rep2	Sample9_rep3	Sample10_rep1	Sample10_rep2	Sample10_rep3	Sample11_rep1	Sample11_rep2	Sample11_rep3	Sample12_rep1	Sample12_rep2	Sample12_rep3	Sample13_rep1	Sample13_rep2	Sample13_rep3	Sample14_rep1	Sample14_rep2	Sample14_rep3	Sample15_rep1	Sample15_rep2	Sample15_rep3	Sample16_rep1	Sample16_rep2	Sample16_rep3
[truncated: 1,922 more rows]
[truncated: 87 more columns]

[truncated: 2 more sheets: LogFC variations discriminants, validation OPLSDA + VIP]
